# Supplementary material for: Acetyltransferase Enok regulates transposon silencing and piRNA cluster transcription
Source: PLoS Genet. 2021 Feb 1;17(2):e1009349. doi: 10.1371/journal.pgen.1009349 (PMC7877743; doi:10.1371/journal.pgen.1009349)
Supplement: S6 Table — Unique mappers from the H3K23ac and H3 ChIP-seq analyses of two replicates of the control (GFP_KD) or the enok knockdown (enok_KD) ovaries mapping to each piRNA cluster or transposon were analyzed using DESeq2. The H3 ChIP-seq data were used as the normalization control for the H3K23ac ChIP-seq data. The results of differential analysis of H3K23ac levels in enok_KD compared with GFP_KD are shown. Transposons or piRNA clusters with decreased H3K23ac levels upon enok knockdown were defined as log2FoldChange < -1 and adjusted p-value < 0.05. Genotypes are as follows: tj-GAL4/+; P{w[+mC] = GAL4::VP16-nos.UTR}CG6325MVD1 / P{VALIUM20-EGFP.shRNA.1}attP2 (GFP_KD); tj-GAL4/+; P{w[+mC] = GAL4::VP16-nos.UTR}CG6325MVD1/P{TRiP.HMS02634}attP2 (enok_KD). (XLSX) [file pgen.1009349.s022.xlsx]

## Sheet: piRNA clusters
cluster	baseMean	log2FoldChange	lfcSE	stat	p_value	adjusted p_value
1	646.166	0.292948	0.134004	2.18612	0.0288072	0.0979444
2	545.824	0.209968	0.127158	1.65124	0.0986898	0.201327
3	3526.86	-0.0498966	0.112446	-0.443739	0.657232	0.72867
4	2699.3	0.431085	0.11291	3.81796	0.00013456	0.00114376
5	321.602	-0.373776	0.157316	-2.37596	0.0175035	0.0637626
6	314.088	-0.165393	0.185264	-0.892742	0.371995	0.499257
7	0	NA	NA	NA	NA	NA
8	312.96	0.123743	0.171359	0.722131	0.470214	0.557696
9	2862.92	-0.149496	0.130581	-1.14486	0.252268	0.402052
10	0	NA	NA	NA	NA	NA
11	47.3734	0.0597749	0.336973	0.177387	0.859204	0.9424
12	344.539	0.291912	0.1732	1.68541	0.0919101	0.195309
13	270.83	-0.136321	0.177407	-0.768407	0.442245	0.537012
14	0	NA	NA	NA	NA	NA
15	211.582	-0.282751	0.192086	-1.472	0.141021	0.266374
16	136.803	-0.0347799	0.289951	-0.119951	0.904522	0.922613
17	0	NA	NA	NA	NA	NA
18	0	NA	NA	NA	NA	NA
19	139.483	0.728445	0.388451	1.87526	0.0607574	0.182272
20	253.509	-0.0635746	0.183286	-0.34686	0.728696	0.786514
21	430.716	0.192856	0.151273	1.27489	0.202349	0.342252
22	3284.59	-0.0100699	0.120644	-0.083468	0.933479	0.933479
23	140.147	-0.159774	0.250372	-0.638146	0.523379	0.606644
24	178.451	-0.441389	0.246785	-1.78856	0.0736859	0.185768
25	155.334	0.312666	0.220793	1.41611	0.156744	0.285499
26	659.842	0.572229	0.132961	4.30375	1.67929e-05	0.000285479
27	208.745	-0.748303	0.188534	-3.96905	7.21588e-05	0.000743749
28	574.691	0.386824	0.150534	2.56968	0.0101793	0.0432619
29	1062.82	0.119921	0.125291	0.957144	0.338494	0.485196
30	146.488	-0.220023	0.227199	-0.968416	0.332837	0.485196
31	200.447	-0.0511215	0.227325	-0.224883	0.82207	0.855624
32	131.56	0.131365	0.270803	0.485094	0.62761	0.860722
33	106.761	-0.469218	0.240995	-1.947	0.0515343	0.291017
34	72.7222	0.0764859	0.329653	0.232019	0.816523	0.928455
35	449.907	0.426374	0.15833	2.69295	0.00708227	0.0361196
36	151.503	-0.0723488	0.218231	-0.331524	0.740249	0.786514
37	209.908	0.194576	0.230672	0.843521	0.398937	0.508645
38	50.5431	0.0995931	0.387423	0.257066	0.797128	0.928455
39	160.154	0.300298	0.238524	1.25899	0.208036	0.342252
40	445.067	0.411811	0.160126	2.57179	0.0101175	0.0432619
41	79.3806	0.216435	0.279411	0.774611	0.43857	0.731992
42	481.787	-0.22098	0.137461	-1.60757	0.107928	0.211706
43	0	NA	NA	NA	NA	NA
44	119.724	0.00614359	0.252029	0.0243766	0.980552	0.990002
45	567.128	-0.123386	0.129982	-0.949255	0.342491	0.485196
46	0	NA	NA	NA	NA	NA
47	229.448	0.340519	0.194593	1.7499	0.0801351	0.185768
48	592.711	0.414261	0.141924	2.91889	0.00351279	0.0199058
49	62.7991	0.410007	0.368657	1.11216	0.266068	0.594012
50	141.502	0.139394	0.23364	0.596616	0.550763	0.624199
51	107.995	-0.454898	0.286432	-1.58816	0.112251	0.359203
52	0	NA	NA	NA	NA	NA
53	623.873	-0.171068	0.184982	-0.924782	0.35508	0.489434
54	0	NA	NA	NA	NA	NA
55	143.011	-0.456997	0.267655	-1.70741	0.0877454	0.194566
56	66.0065	-0.201371	0.376965	-0.534189	0.593211	0.835518
57	125.957	-0.0539264	0.2333	-0.231146	0.817201	0.928455
58	58.7203	0.105174	0.33716	0.31194	0.755086	0.928455
59	51.4528	-0.622341	0.398097	-1.56329	0.117985	0.365372
60	44.7806	-0.066073	0.398863	-0.165653	0.86843	0.9424
61	0	NA	NA	NA	NA	NA
62	247.417	0.449213	0.185786	2.4179	0.0156102	0.0612402
63	0	NA	NA	NA	NA	NA
64	0	NA	NA	NA	NA	NA
65	145.929	0.283377	0.251867	1.1251	0.260545	0.40266
66	0	NA	NA	NA	NA	NA
67	56.7285	0.0402351	0.359725	0.11185	0.910943	0.9424
68	0	NA	NA	NA	NA	NA
69	87.6134	0.00380175	0.303386	0.0125311	0.990002	0.990002
70	21.0539	-1.17223	0.80397	-1.45805	0.144826	0.408922
71	29.2682	0.163766	0.582545	0.281122	0.778617	0.928455
72	26.335	-0.0854776	0.479877	-0.178124	0.858626	0.9424
73	224.035	0.283887	0.207201	1.3701	0.170655	0.300117
74	0	NA	NA	NA	NA	NA
75	167.417	0.168221	0.197574	0.851435	0.394528	0.508645
76	0	NA	NA	NA	NA	NA
77	0	NA	NA	NA	NA	NA
78	182.553	-0.328919	0.187413	-1.75505	0.0792505	0.185768
79	857.507	0.676825	0.119838	5.64782	1.62499e-08	4.14373e-07
80	0	NA	NA	NA	NA	NA
81	24.209	-0.33995	0.542866	-0.626213	0.531175	0.809409
82	0	NA	NA	NA	NA	NA
83	130.628	-0.107333	0.237133	-0.452628	0.650817	0.876309
84	12.0819	0.520576	0.718053	0.724982	0.468463	0.740009
85	0	NA	NA	NA	NA	NA
86	107.24	0.140583	0.249156	0.564236	0.572593	0.820432
87	0	NA	NA	NA	NA	NA
88	76.0685	0.0424691	0.283012	0.150061	0.880716	0.9424
89	37.9671	-0.207326	0.395933	-0.523641	0.600528	0.835518
90	12.5771	1.01053	0.734684	1.37546	0.168988	0.44278
91	54.7517	0.134591	0.324783	0.414401	0.67858	0.89238
92	12291	1.15496	0.107026	10.7914	3.77933e-27	1.92746e-25
93	61.6786	-0.578061	0.349996	-1.65162	0.098612	0.338365
94	0	NA	NA	NA	NA	NA
95	0	NA	NA	NA	NA	NA
96	34.1716	-0.0493662	0.451583	-0.109318	0.91295	0.9424
97	134.109	-0.0760417	0.2115	-0.359535	0.719195	0.928455
98	33.7895	-0.31824	0.404247	-0.787242	0.43114	0.731992
99	0	NA	NA	NA	NA	NA
100	487.325	0.275955	0.154419	1.78705	0.0739289	0.185768
101	0	NA	NA	NA	NA	NA
102	0	NA	NA	NA	NA	NA
103	0	NA	NA	NA	NA	NA
104	21.0845	0.85774	0.581877	1.47409	0.140457	0.408922
105	0	NA	NA	NA	NA	NA
106	157.414	-0.376123	0.209571	-1.79473	0.0726965	0.185768
107	430.656	0.515459	0.169497	3.04111	0.00235707	0.0150263
108	0	NA	NA	NA	NA	NA
109	0	NA	NA	NA	NA	NA
110	13.1453	-1.1526	0.640586	-1.79928	0.0719737	0.32054
111	128.954	0.228983	0.22988	0.996098	0.319202	0.680965
112	18.8632	-0.381088	0.652264	-0.584254	0.559049	0.813162
113	0	NA	NA	NA	NA	NA
114	6.39574	0.884807	0.833779	1.0612	0.288598	0.629669
115	0	NA	NA	NA	NA	NA
116	0	NA	NA	NA	NA	NA
117	0	NA	NA	NA	NA	NA
118	0	NA	NA	NA	NA	NA
119	0	NA	NA	NA	NA	NA
120	0	NA	NA	NA	NA	NA
121	0	NA	NA	NA	NA	NA
122	0	NA	NA	NA	NA	NA
123	0	NA	NA	NA	NA	NA
124	0	NA	NA	NA	NA	NA
125	0	NA	NA	NA	NA	NA
126	0	NA	NA	NA	NA	NA
127	0	NA	NA	NA	NA	NA
128	253.631	0.552668	0.170808	3.2356	0.00121385	0.0088438
129	0	NA	NA	NA	NA	NA
130	62.0769	0.0432304	0.317721	0.136064	0.891771	0.9424
131	194.645	0.165325	0.202246	0.817445	0.413674	0.514571
132	0	NA	NA	NA	NA	NA
133	5.26081	-1.34765	1.67715	-0.803535	0.421665	0.731992
134	14.7373	0.737324	0.635719	1.15983	0.246119	0.590676
135	170.855	0.402119	0.196765	2.04365	0.0409883	0.13065
136	27.198	-0.154276	0.536664	-0.287472	0.773751	0.928455
137	61.3797	-0.0773859	0.303378	-0.255081	0.798661	0.928455
138	8.54155	0.226691	0.91486	0.247788	0.804298	0.928455
139	65.1007	0.188883	0.312551	0.604329	0.545625	0.813162
140	3.24473	1.26474	1.53184	0.825637	0.40901	0.731992
141	257.775	0.647133	0.163147	3.96656	7.29166e-05	0.000743749
142	52.6116	-0.264218	0.364241	-0.725394	0.46821	0.740009

## Sheet: Transposons
Transposon	baseMean	log2FoldChange	lfcSE	stat	p_value	adjusted p_value
5S_DM:RNA:RNA	2778.83	0.610113	0.211913	2.87907	0.00398851	0.11285
ACCORD2_I:Gypsy:LTR	569.698	0.127077	0.188377	0.67459	0.499937	0.932977
ACCORD_I:Gypsy:LTR	435.632	-0.437678	0.183923	-2.37968	0.0173278	0.259916
ALA_DM:ALA_DM:Unknown	13.2038	-0.779825	0.655989	-1.18878	0.234527	0.79183
ALUII_DM:ALUII_DM:Unknown	372.388	0.640184	0.259066	2.47113	0.0134688	0.217574
ARS406_DM:ARS406_DM:Unknown	31.8643	0.125569	0.390788	0.321322	0.747966	0.958175
BARI_DM:Tc1:DNA	832.255	-0.595733	0.167037	-3.56647	0.000361817	0.0336777
BATUMI_I:Pao:LTR/GATE	3583.75	0.407996	0.201107	2.02876	0.0424832	0.429828
BEL_I:Pao:LTR	3459	-0.324804	0.233249	-1.39252	0.163765	0.675179
BLASTOPIA_I:Gypsy:LTR	2384.75	-0.353365	0.141782	-2.4923	0.0126919	0.217574
BLOOD_I:Gypsy:LTR	2024.42	0.283803	0.153447	1.84952	0.0643824	0.484168
BS2:Jockey:LINE	3885.3	0.0423266	0.208137	0.20336	0.838854	0.962619
BS3_DM:Jockey:LINE	863.809	-0.00454099	0.248365	-0.0182835	0.985413	0.999082
BS:Jockey:LINE	1804.1	0.137798	0.157077	0.877264	0.380344	0.921963
BURDOCK_I:Gypsy:LTR	1435.54	-0.2087	0.161034	-1.296	0.194975	0.68203
Baggins1:LOA:LINE	3011.64	0.0426405	0.222301	0.191815	0.847887	0.967698
CIRCE:Composite:LINE	1346.25	-0.202859	0.15338	-1.32259	0.185973	0.675179
Copia2_I:Copia:LTR	1796.07	-0.0631121	0.165359	-0.381667	0.702708	0.957483
Copia_I:Copia:LTR	2882.9	0.0862432	0.230485	0.374182	0.708269	0.957483
DIVER2_I:Pao:LTR	2558.06	0.0550489	0.212055	0.259597	0.795174	0.962619
DIVER_I:Pao:LTR	2125.3	-0.735805	0.213334	-3.44908	0.000562499	0.0336777
DM1731_I:Copia:LTR	1110.18	0.145742	0.230105	0.633374	0.526489	0.944997
DM176_I:Gypsy:LTR	3526.59	0.162092	0.190117	0.852593	0.393885	0.921963
DM297_I:Gypsy:LTR	3667.29	0.180193	0.24039	0.749585	0.453505	0.929139
DM412:Gypsy:LTR	5345.96	0.51814	0.151794	3.41344	0.00064148	0.0336777
DMCR1A:CR1:LINE	6379.14	-0.105531	0.158218	-0.667001	0.504772	0.932977
DMRP1:DMRP1:Unknown	456.177	0.21214	0.24126	0.879302	0.379238	0.921963
DMRPR:DMRPR:Unknown	121.114	-0.0185807	0.242954	-0.0764783	0.939039	0.999082
DMRT1A:R1:LINE	4578.26	0.0871982	0.249107	0.350043	0.726306	0.957483
DMRT1B:R1:LINE	9337.79	0.110245	0.23932	0.460658	0.645044	0.957483
DMRT1C:R1:LINE	2882.46	0.405334	0.241738	1.67675	0.0935917	0.533127
DMSAT6:Satellite:Satellite	3776.96	-0.172909	0.227744	-0.759225	0.447718	0.929139
DNAREP1_DM:Penelope:LINE	25857.2	0.130832	0.162507	0.805083	0.420772	0.921963
DOC2_DM:Jockey:LINE	1009.5	-0.046587	0.194894	-0.239038	0.811076	0.962619
DOC3_DM:Jockey:LINE	1666.31	-0.068121	0.182832	-0.372587	0.709456	0.957483
DOC4_DM:Jockey:LINE	465.799	-0.0240702	0.202303	-0.118981	0.905291	0.999082
DOC5_DM:Jockey:LINE	441.825	-0.036481	0.201664	-0.1809	0.856446	0.972182
DOC6_DM:Jockey:LINE	672.72	0.133413	0.256954	0.51921	0.603614	0.957483
DOC:Jockey:LINE	7543.07	0.131591	0.170479	0.771888	0.440181	0.924379
FB4_DM:Tc1:DNA	8923.43	0.424313	0.156351	2.71385	0.00665054	0.155179
FROGGER_I:Copia:LTR	601.285	0.00824199	0.171269	0.0481231	0.961618	0.999082
FW2_DM:Jockey:LINE	301.665	-0.178309	0.189808	-0.939421	0.347515	0.921963
FW3_DM:Jockey:LINE	221.074	-0.263418	0.223021	-1.18114	0.237549	0.79183
FW_DM:Jockey:LINE	11332.2	0.018622	0.197568	0.0942564	0.924905	0.999082
G2_DM:Jockey:LINE	1261.98	-0.207177	0.233665	-0.886641	0.375272	0.921963
G3_DM:Jockey:LINE	227.889	0.0457365	0.218145	0.209661	0.833932	0.962619
G4_DM:Jockey:LINE	507.65	-0.0511865	0.198725	-0.257574	0.796735	0.962619
G5A_DM:Jockey:LINE	718.191	0.1189	0.177465	0.669991	0.502864	0.932977
G5_DM:Jockey:LINE	1299.18	0.17587	0.242449	0.72539	0.468213	0.929139
G6_DM:Jockey:LINE	929.576	-0.366893	0.251288	-1.46005	0.144277	0.675179
G7_DM:Jockey:LINE	50.7136	-0.0920915	0.40789	-0.225775	0.821376	0.962619
GTWIN_I:Gypsy:LTR	997.921	0.147074	0.17834	0.824683	0.409552	0.921963
G_DM:Jockey:LINE	998.616	-0.160442	0.226821	-0.707351	0.479348	0.932066
Gypsy10_I:Gypsy:LTR	484.54	-0.0714612	0.190241	-0.375634	0.707189	0.957483
Gypsy11_I:Gypsy:LTR	221.873	0.106697	0.244527	0.436339	0.66259	0.957483
Gypsy12_I:Gypsy:LTR	1043.32	0.0103849	0.159351	0.0651701	0.948039	0.999082
Gypsy2_I:Gypsy:LTR	2838.62	0.122227	0.233436	0.5236	0.600557	0.957483
Gypsy3_I:Gypsy:LTR	1371.66	0.0781154	0.205018	0.381017	0.703191	0.957483
Gypsy4_I:Gypsy:LTR	2211.05	-0.120007	0.144573	-0.830079	0.406494	0.921963
Gypsy5_I:Gypsy:LTR	608.941	0.0988122	0.240727	0.410474	0.681459	0.957483
Gypsy6_I:Gypsy:LTR	4339.61	0.356259	0.216833	1.64301	0.100381	0.554737
Gypsy7_I:Gypsy:LTR	355.314	-0.318922	0.22742	-1.40235	0.160811	0.675179
Gypsy8_I:Gypsy:LTR	2683.35	0.507428	0.252554	2.00919	0.0445172	0.429828
Gypsy9_I:Gypsy:LTR	135.895	-0.498813	0.28229	-1.76702	0.0772246	0.484168
Gypsy_DS:Gypsy:LTR	80.4367	0.0779771	0.281025	0.277474	0.781416	0.962619
Gypsy_I:Gypsy:LTR	2237.82	0.366693	0.200924	1.82503	0.067996	0.484168
HELENA_RT:Jockey:LINE	205.795	-0.0666803	0.215879	-0.308878	0.757415	0.958175
HETA:telomeric:LINE	14608	-0.155656	0.189033	-0.823437	0.41026	0.921963
HETRP_DM:Satellite:Satellite	1279.23	-0.339841	0.17201	-1.9757	0.048189	0.439987
HMSBEAGLE_I:Gypsy:LTR	4267.67	-0.196419	0.148987	-1.31836	0.187382	0.675179
HOBO:hAT:DNA	4858.01	0.255294	0.169101	1.50971	0.131117	0.675179
IDEFIX_I:Gypsy:LTR	1505.77	0.137182	0.258119	0.531468	0.595095	0.957483
IVK_DM:I:LINE	2243.51	0.0134751	0.153524	0.0877715	0.930058	0.999082
I_DM:I:LINE	4398.2	0.110395	0.166172	0.664339	0.506473	0.932977
Invader1_I:Gypsy:LTR	978.649	-0.232078	0.160412	-1.44676	0.147964	0.675179
Invader2_I:Gypsy:LTR	972.962	-0.0409909	0.167694	-0.244439	0.806891	0.962619
Invader3_I:Gypsy:LTR	861.287	-0.13385	0.164214	-0.815099	0.415016	0.921963
Invader4_I:Gypsy:LTR	639.275	0.00871669	0.198927	0.0438185	0.965049	0.999082
Invader5_I:Gypsy:LTR	141.727	0.0252362	0.240168	0.105077	0.916315	0.999082
Invader6_I:Gypsy:LTR	610.459	0.0373535	0.171079	0.21834	0.827164	0.962619
Jockey2:Jockey:LINE	457.098	-0.0137555	0.17443	-0.0788596	0.937144	0.999082
LINEJ1_DM:Jockey:LINE	5771.2	-0.288046	0.191373	-1.50516	0.132283	0.675179
LOOPER1_DM:PiggyBac:DNA	93.28	0.102027	0.29776	0.342648	0.731863	0.957483
M4DM:Transib:DNA	1052.49	-0.139043	0.193453	-0.718743	0.472299	0.929139
MARINA:Mariner:DNA	57.6588	0.212703	0.296686	0.716928	0.473419	0.929139
MAX_I:Pao:LTR	6133.55	0.116789	0.218634	0.534178	0.593218	0.957483
MDG1_I:Gypsy:LTR	2647.15	0.413023	0.157406	2.62394	0.00869191	0.179264
MDG3_I:Gypsy:LTR	2386.71	-0.258166	0.152084	-1.69752	0.0895987	0.533127
MICROPIA_I:Gypsy:LTR	1665.21	-0.310291	0.144159	-2.15242	0.0313643	0.387441
MINOS:Tc1:DNA	72.596	0.107363	0.295423	0.363423	0.716289	0.957483
Mariner2_DM:Tc1:DNA	645.292	0.109358	0.18293	0.597812	0.549965	0.954485
NINJA_I:Pao:LTR	2644.24	0.284969	0.257939	1.10479	0.26925	0.841091
NOF_FB:MuDR:DNA	43.4562	0.188884	0.364327	0.518446	0.604147	0.957483
NOMAD_I:Gypsy:LTR	7187.55	0.0183346	0.209104	0.0876817	0.93013	0.999082
OSVALDO_I:Gypsy:LTR	270.946	0.145124	0.289532	0.501235	0.616206	0.957483
PENELOPE:Penelope:LINE	84.6107	0.0258589	0.275267	0.0939413	0.925156	0.999082
PLACW_DM:P:DNA	34.5848	0.138986	0.426802	0.325645	0.744693	0.958175
POGO:Pogo:DNA	802.691	0.0590781	0.15548	0.379971	0.703967	0.957483
POGON1:Pogo:DNA	206.16	0.2243	0.217802	1.02983	0.303088	0.866275
PROTOP:P:DNA	2157.54	0.207792	0.185107	1.12255	0.261629	0.841091
PROTOP_A:P:DNA	3349.13	0.261252	0.14424	1.81123	0.0701055	0.484168
PROTOP_B:P:DNA	2140.32	0.209257	0.156114	1.34042	0.18011	0.675179
P_DG:P:DNA	108.257	0.352655	0.243638	1.44746	0.147769	0.675179
QUASIMODO_I:Gypsy:LTR	1908.38	0.0988828	0.24814	0.398495	0.690265	0.957483
R1-2_DM:R1:LINE	274.101	0.373916	0.360872	1.03614	0.300135	0.866275
R1_DM:R1:LINE	16181.5	0.388454	0.249243	1.55854	0.119106	0.64134
R2_DM:R2:LINE	1872.99	1.04925	0.226028	4.64212	3.44845e-06	0.000724174
ROOA_I:Pao:LTR	929.97	-0.326631	0.169066	-1.93197	0.0533634	0.46693
ROO_I:Pao:LTR	42972.5	0.248798	0.138428	1.79731	0.0722865	0.484168
ROVER-I_DM:Gypsy:LTR	4788.13	0.00426733	0.194626	0.0219258	0.982507	0.999082
RSP:Satellite:Satellite	318.398	-0.848022	0.271056	-3.12859	0.00175648	0.0737721
Rehavkus-1_DY:MuDR:DNA	26.8699	-0.242064	0.454483	-0.532614	0.594301	0.957483
Rehavkus-1_DY:Tc1:DNA	39.0925	0.291388	0.340596	0.855524	0.392261	0.921963
S2_DM:Tc1:DNA	313.695	0.116371	0.190933	0.609485	0.542203	0.954485
SAR_DM:Satellite:Satellite	19846.8	-0.202429	0.211893	-0.955333	0.33941	0.913795
STALKER4_I:Gypsy:LTR	2148.58	0.0455321	0.220143	0.20683	0.836142	0.962619
S_DM:Tc1:DNA	2288.41	0.468689	0.164144	2.85534	0.00429904	0.11285
Stalker2_I:Gypsy:LTR	1254.82	0.293762	0.166367	1.76575	0.0774385	0.484168
TABOR_I:Gypsy:LTR	540.697	0.288056	0.206404	1.39559	0.162837	0.675179
TAHRE:telomeric:LINE	941.868	-0.112428	0.186067	-0.604236	0.545687	0.954485
TART:telomeric:LINE	4454.68	0.14528	0.20062	0.724155	0.468971	0.929139
TART_B1:telomeric:LINE	322.62	0.162737	0.264769	0.614638	0.538794	0.954485
TC1-2_DM:Tc1:DNA	599.368	0.318761	0.220002	1.4489	0.147366	0.675179
TC1_DM:Tc1:DNA	1302.83	0.167554	0.16007	1.04675	0.295213	0.866275
TIRANT_I:Gypsy:LTR	539.209	0.518372	0.176074	2.94405	0.00323948	0.11285
TOM_I:Gypsy:LTR	232.026	0.337614	0.309135	1.09212	0.274779	0.841091
TRANSIB1:Transib:DNA	124.29	-0.184749	0.282272	-0.654509	0.512784	0.936388
TRANSIB2:Transib:DNA	681.001	-0.00041632	0.225905	-0.0018429	0.99853	0.999082
TRANSIB3:Transib:DNA	272.005	-0.307502	0.227616	-1.35097	0.176705	0.675179
TRANSIB4:Transib:DNA	172.681	0.371093	0.271197	1.36835	0.171202	0.675179
TRANSPAC_I:Gypsy:LTR	1307.17	0.0157199	0.256	0.0614059	0.951036	0.999082
TV1I:Gypsy:LTR	153.815	-0.0106917	0.302427	-0.0353532	0.971798	0.999082
Transib-N1_DM:Transib:DNA	332.882	0.18638	0.216994	0.858918	0.390386	0.921963
Transib5:Transib:DNA	232.69	-0.458562	0.25228	-1.81767	0.0691142	0.484168
Ulysses_I:Gypsy:LTR	261.004	0.0141027	0.275818	0.0511304	0.959222	0.999082
XDMR:XDMR:Unknown	1135.98	0.0926799	0.234146	0.39582	0.692238	0.957483
XDMR_DM:XDMR_DM:Unknown	292.89	0.196025	0.248253	0.789617	0.429751	0.924379
ZAM_I:Gypsy:LTR	502.503	0.139602	0.192388	0.725629	0.468066	0.929139
