# Supplementary material for: Acetyltransferase Enok regulates transposon silencing and piRNA cluster transcription
Source: PLoS Genet. 2021 Feb 1;17(2):e1009349. doi: 10.1371/journal.pgen.1009349 (PMC7877743; doi:10.1371/journal.pgen.1009349)
Supplement: S7 Table — Data used in box plots or bar charts that are not presented in S1–S6 Tables are shown. (XLSX) [file pgen.1009349.s023.xlsx]

## Sheet: Fig2B
RD-SL			RI-SL			SO-SL			het non-SL
WT	enok1	enok2	WT	enok1	enok2	WT	enok1	enok2	WT	enok1	enok2
-0.542277	-2.61171	-2.15102	-2.15392	0.265568	-2.1336	0.479276	-0.639317	-1.83174	-2.15392	0.265568	-2.1336
1.22487	-2.61171	-2.15102	1.71038	0.464249	-2.13214	1.23758	0.33718	-1.79751	1.71038	0.464249	-2.13214
1.92614	-2.61171	-2.15102	2.84971	-2.61171	-1.83174	1.15504	-0.546286	-1.53129	2.84971	-2.61171	-1.83174
2.29986	-2.61171	-2.15102	-2.04289	-1.31183	-1.83174	1.51343	0.819088	-1.38823	-2.04289	-1.31183	-1.83174
2.92043	-2.61171	-2.15102	-1.05653	0.72746	-1.83174	1.15111	0.439599	-1.33152	-1.05653	0.72746	-1.83174
-0.508832	-2.12764	-2.15102	-1.0703	0.523325	-1.79751	-2.16411	0.752658	-1.14378	-1.0703	0.523325	-1.79751
0.223388	-2.12764	-2.15102	2.12485	0.121346	-1.53129	-0.164889	0.579818	-0.905868	2.12485	0.121346	-1.53129
0.231977	-2.12764	-2.15102	1.08874	-0.725759	-1.52731	0.49985	-1.60303	-0.788828	1.08874	-0.725759	-1.52731
3.83081	-1.61171	-2.15102	0.492611	-2.61027	-1.14957	-0.48534	-2.12764	-0.566054	0.492611	-2.61027	-1.14957
1.08711	-1.34947	-2.15102	-0.0605594	1.07783	-1.13068	1.36849	-0.0349589	-0.555919	-0.0605594	1.07783	-1.13068
-1.11994	-0.846735	-2.15102	1.52472	-2.08815	-1.11153	-0.508832	0.587356	-0.451597	1.52472	-2.08815	-1.11153
-0.508832	-0.686712	-2.15102	1.24263	0.0886451	-1.08028	0.246258	-0.445307	-0.442914	1.24263	0.0886451	-1.08028
3.96968	-0.686712	-2.15102	1.01331	-0.958979	-1.04632	0.237576	-0.846735	-0.438349	1.01331	-0.958979	-1.04632
1.79602	-0.66282	-2.15102	-0.112793	0.512874	-0.982565	1.0597	1.38662	-0.432567	-0.112793	0.512874	-0.982565
1.098	-0.639317	-2.15102	1.49708	-1.02675	-0.963463	-1.04289	0.166662	-0.345557	1.49708	-1.02675	-0.963463
0.268134	-0.474638	-2.15102	0.428689	0.0486527	-0.919941	0.9191	0.502347	-0.345557	0.428689	0.0486527	-0.919941
4.37209	-0.199507	-2.15102	-0.466839	-0.635313	-0.912064	1.37636	0.736471	-0.333244	-0.466839	-0.635313	-0.912064
2.80175	-0.0794039	-2.15102	3.22683	-1.16781	-0.838555	1.99227	0.800493	-0.333244	3.22683	-1.16781	-0.838555
3.03481	-0.0450933	-2.15102	-0.496599	1.29012	-0.828854	0.479276	1.73197	-0.333244	-0.496599	1.29012	-0.828854
-0.0565322	0.995163	-2.15102	-1.11994	0.0343271	-0.814525	-0.0949058	0.639086	-0.235279	-1.11994	0.0343271	-0.814525
-0.0780116	-0.636429	-2.14813	1.60083	0.502347	-0.814525	1.05074	0.434337	-0.0643334	1.60083	0.502347	-0.814525
-2.06597	-2.05934	-2.14668	1.543	-0.169954	-0.783948	0.197614	-0.216797	-0.0541939	1.543	-0.169954	-0.783948
3.08023	0.594587	-2.14378	-0.00168479	-2.04144	-0.71131	1.61458	1.55707	-0.0426059	-0.00168479	-2.04144	-0.71131
0.958986	-0.630635	-2.14233	2.4191	0.899677	-0.689707	1.50996	-0.196672	-0.0233118	2.4191	0.899677	-0.689707
-2.03276	-2.60157	-2.14088	-0.977519	1.25966	-0.672108	-0.0808999	0.810731	0.0174349	-0.977519	1.25966	-0.672108
3.70474	-2.05209	-2.13943	0.612724	0.184911	-0.618552	0.702734	-0.66282	0.0270176	0.612724	0.184911	-0.618552
1.48284	-1.1146	-2.13797	-0.707391	0.418854	-0.499516	2.78248	0.534598	0.0333797	-0.707391	0.418854	-0.499516
-1.10106	-2.59283	-2.13214	2.13286	0.123408	-0.438349	1.07925	-0.521041	0.0948163	2.13286	0.123408	-0.438349
0.216594	-0.265044	-2.12628	2.00985	0.775605	-0.387899	0.71694	-0.216797	0.0948163	2.00985	0.775605	-0.387899
3.01409	0.675268	-2.12628	2.26697	1.7392	-0.34447	0.212056	-0.0636762	0.1039	2.26697	1.7392	-0.34447
2.2091	-2.5483	-2.08761	1.6578	1.26643	-0.331572	1.92783	0.613398	0.117262	1.6578	1.26643	-0.331572
4.97318	-0.566835	-2.07853	-1.05653	-0.0763129	-0.321036	1.48882	0.639086	0.185475	-1.05653	-0.0763129	-0.321036
1.67105	-1.01522	-2.07093	-0.0634009	0.609064	-0.321036	1.09	1.35888	0.205378	-0.0634009	0.609064	-0.321036
1.89777	-2.52704	-2.06635	3.80431	0.447816	-0.295238	0.71694	0.745427	0.30721	3.80431	0.447816	-0.295238
3.60302	-1.46929	-2.0086	2.22166	-0.630821	-0.277353	1.36859	0.871608	0.315053	2.22166	-0.630821	-0.277353
2.58467	-1.16142	-2.00062	2.34795	2.4056	-0.267172	0.936599	2.17297	0.315053	2.34795	2.4056	-0.267172
0.401583	-1.1534	-1.99259	1.63224	-0.0466257	-0.15869	0.452917	0.747173	0.378322	1.63224	-0.0466257	-0.15869
1.52742	-0.287487	-1.98451	2.53214	-0.0227044	-0.110044	0.891854	0.544741	0.384453	2.53214	-0.0227044	-0.110044
5.3576	-0.257047	-1.93342	2.59476	1.2382	-0.0871454	0.507604	-0.330524	0.385789	2.59476	1.2382	-0.0871454
2.63571	-2.61171	-1.83174	2.87139	1.21555	-0.0860987	-0.499487	-0.0763129	0.385789	2.87139	1.21555	-0.0860987
1.27087	-2.12764	-1.83174	3.90658	-0.330524	-0.0541939	0.684293	0.491742	0.385789	3.90658	-0.330524	-0.0541939
2.89706	-2.06368	-1.83174	-0.0565322	0.235494	0.0174349	0.903241	1.19369	0.385789	-0.0565322	0.235494	0.0174349
3.18762	-1.61171	-1.83174	0.88364	2.86154	0.0365371	-0.48534	0.434337	0.393218	0.88364	2.86154	0.0365371
1.23758	-1.34947	-1.83174	1.36949	0.566496	0.0465792	-0.145408	-2.61171	0.446092	1.36949	0.566496	0.0465792
1.78741	-1.12764	-1.83174	3.34693	-0.6383	0.0658471	-0.48534	-0.686712	0.446092	3.34693	-0.6383	0.0658471
1.04269	-1.09531	-1.83174	-0.21016	-1.31304	0.074804	1.07925	1.10065	0.446092	-0.21016	-1.31304	0.074804
1.80458	-1.09531	-1.83174	2.36949	0.266612	0.0808108	0.452917	1.41653	0.446092	2.36949	0.266612	0.0808108
3.73113	-1.09531	-1.83174	-0.113712	1.58051	0.0953219	0.71694	-0.199507	0.453218	-0.113712	1.58051	0.0953219
0.727031	-0.521041	-1.83174	0.887207	0.109603	0.1039	2.15468	2.14858	0.460309	0.887207	0.109603	0.1039
1.50528	-0.499722	-1.83174	0.702734	-1.12764	0.112927	1.06154	0.491843	0.467687	0.702734	-1.12764	0.112927
3.19597	0.235494	-1.83174	-1.0703	0.678856	0.112927	2.69601	1.2041	0.491524	-1.0703	0.678856	0.112927
4.88507	0.313288	-1.83174	2.2642	-0.252507	0.114397	1.21195	0.908296	0.493592	2.2642	-0.252507	0.114397
4.35784	0.660035	-1.83174	2.15715	0.450073	0.188447	1.3503	0.390432	0.522952	2.15715	0.450073	0.188447
1.20733	1.0276	-1.83089	1.43225	1.90321	0.1956	0.523855	1.13841	0.555042	1.43225	1.90321	0.1956
1.82114	-2.06223	-1.8303	2.8221	0.461239	0.203879	1.10397	0.803381	0.55793	2.8221	0.461239	0.203879
1.049	-0.685269	-1.8303	2.38434	0.81336	0.253021	1.45898	-0.111383	0.561651	2.38434	0.81336	0.253021
-0.473257	-2.12475	-1.82885	2.93625	1.26792	0.268917	1.26154	1.2281	0.602622	2.93625	1.26792	0.268917
-0.459777	-2.60448	-1.82451	1.68011	1.38561	0.283387	0.368303	1.28355	0.613685	1.68011	1.38561	0.283387
1.59819	-1.12041	-1.82451	2.75518	0.960472	0.289732	1.24332	0.600774	0.655129	2.75518	0.960472	0.289732
0.717582	-2.60303	-1.82306	-0.353824	0.103292	0.314515	2.07695	0.978582	0.660613	-0.353824	0.103292	0.314515
2.60604	-0.532546	-1.82161	1.06399	1.58773	0.344263	1.24315	0.0488686	0.666756	1.06399	1.58773	0.344263
1.59066	-2.59429	-1.81433	-0.86019	-0.03832	0.347685	0.69868	1.10201	0.666756	-0.86019	-0.03832	0.347685
1.21074	-2.0448	-1.81286	-1.74665	0.225181	0.360354	0.733895	-0.496834	0.669644	-1.74665	0.225181	0.360354
1.08874	-0.667834	-1.81286	2.60682	1.4277	0.438932	0.900599	1.10282	0.67488	2.60682	1.4277	0.438932
1.92557	0.155502	-1.79965	2.41223	-0.845291	0.440375	1.26466	1.29682	0.719298	2.41223	-0.845291	0.440375
-0.0565322	-2.61171	-1.79751	1.42353	0.887268	0.480765	0.734698	1.81224	0.722352	1.42353	0.887268	0.480765
-1.0703	-2.12764	-1.79751	0.261794	-0.0311424	0.486584	0.513674	0.689618	0.723923	0.261794	-0.0311424	0.486584
0.212056	-2.12764	-1.79751	-0.551905	0.660035	0.503976	1.47346	0.465336	0.743317	-0.551905	0.660035	0.503976
-2.04289	-2.06368	-1.79751	2.68803	1.69696	0.515579	1.06192	0.523325	0.760745	2.68803	1.69696	0.515579
-2.0703	-1.34947	-1.79751	1.63706	0.455147	0.515636	1.49474	1.61492	0.760745	1.63706	0.455147	0.515636
3.14679	-1.31183	-1.79751	3.20199	0.710219	0.524417	1.20914	1.70063	0.763917	3.20199	0.710219	0.524417
-2.17134	-1.12764	-1.79751	2.53613	1.08082	0.548304	1.80835	0.137083	0.807468	2.53613	1.08082	0.548304
-0.105686	-1.09531	-1.79751	1.07925	-0.111383	0.555042	1.36994	1.29945	0.807468	1.07925	-0.111383	0.555042
-1.10569	-1.06368	-1.79751	1.72094	1.50762	0.555042	-0.346235	1.56666	0.809585	1.72094	1.50762	0.555042
2.41638	-0.66282	-1.79751	2.93049	0.571709	0.559378	-0.0920175	0.874496	0.810356	2.93049	0.571709	0.559378
2.07695	-0.521041	-1.79751	0.852693	-1.70932	0.569145	-1.05653	-0.0763129	0.852724	0.852693	-1.70932	0.569145
4.96506	0.718392	-1.79751	2.98453	2.54496	0.576363	1.08711	1.54088	0.852724	2.98453	2.54496	0.576363
0.734971	0.89825	-1.79751	2.12525	1.89845	0.596698	0.223388	1.15063	0.858103	2.12525	1.89845	0.596698
-2.16989	1.24328	-1.79607	2.15538	0.791874	0.602397	0.197614	0.810731	0.863462	2.15538	0.791874	0.602397
1.49929	-0.605927	-1.79173	0.214945	-0.659932	0.618049	0.724935	1.5506	0.863462	0.214945	-0.659932	0.618049
2.30452	-1.60303	-1.78883	2.68662	2.31918	0.644843	1.61604	1.39962	0.871146	2.68662	2.31918	0.644843
-0.141101	-0.106907	-1.78328	3.01939	2.33732	0.665021	2.8149	0.652925	0.873904	3.01939	2.33732	0.665021
1.5803	-1.04908	-1.75318	2.88785	-0.790583	0.67011	0.63749	1.86032	0.882871	2.88785	-0.790583	0.67011
2.48228	-1.29657	-1.74462	1.35578	-0.216797	0.672873	1.37248	1.60415	0.898207	1.35578	-0.216797	0.672873
1.48804	-0.22428	-1.73598	1.50406	2.20735	0.678964	1.88721	1.9545	0.901822	1.50406	2.20735	0.678964
1.33731	-1.98206	-1.7159	1.86888	1.29185	0.679759	0.927782	0.85649	0.904082	1.86888	1.29185	0.679759
4.73173	0.898465	-1.70978	1.22497	1.59459	0.680105	1.05876	1.43986	0.912202	1.22497	1.59459	0.680105
2.90653	-0.122918	-1.70363	2.5346	1.16524	0.694009	1.2309	0.36932	0.927362	2.5346	1.16524	0.694009
2.55847	-2.13175	-1.67106	1.22621	0.445371	0.72248	2.62744	1.32031	0.927937	1.22621	0.445371	0.72248
4.21024	1.13956	-1.65549	1.32527	0.920126	0.745247	1.51575	1.98993	0.940745	1.32527	0.920126	0.745247
2.09593	1.1994	-1.62751	3.69641	0.94102	0.772098	2.74176	2.60137	0.961165	3.69641	0.94102	0.772098
2.07776	1.02294	-1.61145	2.71212	2.33942	0.789646	1.06434	2.07937	0.962559	2.71212	2.33942	0.789646
2.32286	-0.939936	-1.6098	3.35639	1.5506	0.807468	1.50063	1.40365	0.986983	3.35639	1.5506	0.807468
2.42284	0.696985	-1.6073	3.11833	1.00814	0.811655	1.24037	1.49602	0.986983	3.11833	1.00814	0.811655
1.90652	-0.494067	-1.60487	3.15201	1.60768	0.823576	2.06507	2.027	0.991885	3.15201	1.60768	0.823576
2.85861	1.301	-1.58824	4.36099	3.56586	0.837488	1.11267	1.48033	0.993653	4.36099	3.56586	0.837488
0.484813	-0.419633	-1.53043	0.968696	1.69976	0.860572	1.07085	1.2527	0.997667	0.968696	1.69976	0.860572
4.68373	0.577227	-1.51521	1.06507	1.05608	0.863462	1.68692	1.99633	1.01395	1.06507	1.05608	0.863462
2.61845	-0.215332	-1.50439	2.86286	0.998489	0.874464	0.537538	1.0101	1.02223	2.86286	0.998489	0.874464
1.34299	0.69724	-1.50264	3.01282	1.74665	0.89862	1.50174	1.29826	1.02223	3.01282	1.74665	0.89862
0.256169	-0.776568	-1.48067	3.81811	2.42032	0.932125	1.59166	1.54323	1.02991	3.81811	2.42032	0.932125
0.605063	0.196815	-1.43316	-2.0703	0.179934	0.940745	1.51049	1.73936	1.02991	-2.0703	0.179934	0.940745
3.12501	-1.7241	-1.4282	1.8027	0.810731	0.944255	-0.0634009	-0.499722	1.03179	1.8027	0.810731	0.944255
1.04248	-0.588123	-1.29222	2.10457	1.90344	0.94604	1.08237	1.65436	1.03179	2.10457	1.90344	0.94604
2.45222	2.25213	-1.24324	2.87952	1.43722	0.950006	2.80835	1.7697	1.06132	2.87952	1.43722	0.950006
1.71678	1.81285	-1.2191	0.35407	0.847387	0.958241	1.20901	1.33123	1.06162	0.35407	0.847387	0.958241
0.0725063	-0.72108	-1.20677	2.24316	1.48704	0.971939	-0.986959	0.354221	1.06453	2.24316	1.48704	0.971939
1.8548	0.471555	-1.20482	0.481761	0.512874	0.985476	2.36543	1.74988	1.06597	0.481761	0.512874	0.985476
3.31504	0.797611	-1.1539	1.69354	1.76884	0.986983	-0.518239	1.78755	1.06597	1.69354	1.76884	0.986983
4.10633	-2.06368	-1.15102	3.54893	0.197896	0.992295	1.2305	2.24031	1.06597	3.54893	0.197896	0.992295
-1.02401	-1.29295	-1.13214	3.13269	1.66203	0.992413	1.23643	1.27374	1.06969	3.13269	1.66203	0.992413
2.40897	0.339493	-1.12481	0.874305	1.45156	1.03078	1.87279	2.40446	1.07061	0.874305	1.45156	1.03078
2.57499	0.786112	-1.09962	1.62036	2.05281	1.03179	2.13643	2.89379	1.0733	1.62036	2.05281	1.03179
-0.442405	-0.57289	-1.08459	0.989237	3.50608	1.03304	1.77268	1.86587	1.10102	0.989237	3.50608	1.03304
-0.0347197	1.7386	-1.08005	3.34402	2.15047	1.03726	1.23331	1.4277	1.1039	3.34402	2.15047	1.03726
0.987049	-1.84805	-1.06808	1.88969	0.785412	1.04033	0.94689	2.23077	1.1039	1.88969	0.785412	1.04033
-0.38297	0.0502535	-1.06055	3.10171	1.5665	1.04658	1.09	2.07113	1.11131	3.10171	1.5665	1.04658
2.11162	-0.710707	-1.04166	2.294	0.274289	1.04856	1.22487	2.23077	1.11293	2.294	0.274289	1.04856
0.348587	-1.22975	-0.997815	2.38731	1.92075	1.05469	1.39901	2.15605	1.11554	2.38731	1.92075	1.05469
2.99936	-2.61171	-0.982565	1.61174	2.3105	1.06732	2.56258	2.87529	1.11682	1.61174	2.3105	1.06732
-2.04289	-1.61171	-0.982565	0.727031	4.88373	1.07061	2.00784	1.79296	1.1273	0.727031	4.88373	1.07061
-1.05653	-1.61171	-0.982565	2.70608	3.6925	1.0733	-0.542277	-1.02675	1.14221	2.70608	3.6925	1.0733
4.71085	-1.34947	-0.982565	-0.752448	0.0694216	1.08565	0.714369	1.42805	1.1423	-0.752448	0.0694216	1.08565
0.720943	-1.31183	-0.982565	1.63677	0.928809	1.09141	1.58658	1.1924	1.14661	1.63677	0.928809	1.09141
1.71894	-1.31183	-0.982565	-0.0893168	1.18257	1.09193	2.08866	2.5478	1.14966	-0.0893168	1.18257	1.09193
0.720943	-1.12764	-0.982565	0.448095	0.791874	1.10076	1.38528	0.986157	1.1584	0.448095	0.791874	1.10076
4.25468	-1.12764	-0.982565	0.395688	1.60516	1.12092	2.20704	2.7357	1.16492	0.395688	1.60516	1.12092
0.237576	-0.349468	-0.982565	-0.0995542	-0.654398	1.12585	1.23331	0.351277	1.17391	-0.0995542	-0.654398	1.12585
-1.05653	-0.199507	-0.982565	3.19838	3.09686	1.12827	1.81871	1.16666	1.17391	3.19838	3.09686	1.12827
1.97129	0.980067	-0.982565	0.942697	2.77407	1.13147	2.16353	1.80133	1.17391	0.942697	2.77407	1.13147
1.10489	-2.60012	-0.970977	2.42352	2.11989	1.13465	2.15686	1.99516	1.17391	2.42352	2.11989	1.13465
1.3809	1.10404	-0.965148	1.50374	1.79621	1.1377	1.22642	1.84097	1.18689	1.50374	1.79621	1.1377
-2.04289	-2.61171	-0.963463	3.75574	2.06728	1.14808	1.31363	1.35827	1.20578	3.75574	2.06728	1.14808
-2.17134	-2.12764	-0.963463	0.539459	1.5326	1.17784	1.73892	1.36296	1.21334	0.539459	1.5326	1.17784
1.18455	-2.12764	-0.963463	1.65605	2.56338	1.20142	0.720943	1.46226	1.21334	1.65605	2.56338	1.20142
2.91165	-2.12764	-0.963463	-1.10569	0.445371	1.20492	1.88721	2.00299	1.21334	-1.10569	0.445371	1.20492
2.56397	-1.61171	-0.963463	1.26057	0.170683	1.21142	0.180099	0.966997	1.21622	1.26057	0.170683	1.21142
5.42753	-1.61171	-0.963463	1.23135	-0.0416334	1.22452	0.402604	0.71213	1.22149	1.23135	-0.0416334	1.22452
1.22621	-1.34947	-0.963463	2.36559	2.12395	1.23141	1.91758	3.98658	1.22576	2.36559	2.12395	1.23141
3.3693	-1.34947	-0.963463	1.22887	1.04577	1.23618	0.465027	2.14181	1.24352	1.22887	1.04577	1.23618
3.38637	-1.12764	-0.963463	0.744345	1.91467	1.2477	1.40933	2.10553	1.26175	0.744345	1.91467	1.2477
-1.10569	-1.06368	-0.963463	2.20189	1.56202	1.25131	-0.0951993	0.470107	1.26826	2.20189	1.56202	1.25131
3.05807	-0.453989	-0.963463	2.5649	2.42032	1.2514	2.06187	1.71182	1.28128	2.5649	2.42032	1.2514
2.80076	-0.349468	-0.963463	1.70778	1.82723	1.26618	1.084	2.03726	1.28235	1.70778	1.82723	1.26618
2.54591	0.40981	-0.963463	2.82568	0.762671	1.26653	2.39887	1.59922	1.28911	2.82568	0.762671	1.26653
2.00679	-2.12475	-0.960575	0.625977	-0.949761	1.28178	0.526561	2.043	1.2938	0.625977	-0.949761	1.28178
3.8464	-0.342237	-0.956231	2.06726	-1.59175	1.28495	1.50406	0.855154	1.29705	2.06726	-1.59175	1.28495
2.32615	-0.144055	-0.947518	2.04999	1.80847	1.28855	0.650345	2.06074	1.30346	2.04999	1.80847	1.28855
2.82024	-1.58844	-0.940193	2.2557	1.15063	1.28911	1.10271	1.01796	1.31386	2.2557	1.15063	1.28911
4.8041	-0.660507	-0.937258	-0.02616	1.68576	1.29955	0.90676	0.745427	1.31505	-0.02616	1.68576	1.29955
2.13669	0.153915	-0.933425	2.08929	0.833322	1.30361	2.95829	2.38315	1.31505	2.08929	0.833322	1.30361
2.04358	-1.06469	-0.932844	0.788881	1.80397	1.30381	1.25184	0.678158	1.33034	0.788881	1.80397	1.30381
1.81628	-0.805796	-0.930066	3.18676	2.27324	1.3103	2.31895	1.94841	1.33388	3.18676	2.27324	1.3103
2.02101	-0.448323	-0.912064	4.28251	0.677811	1.31426	1.24315	1.22787	1.34703	4.28251	0.677811	1.31426
4.69566	-0.772734	-0.908565	2.42698	1.30526	1.31483	1.24037	1.89349	1.34703	2.42698	1.30526	1.31483
2.63677	0.260022	-0.902477	1.06507	0.72746	1.33936	1.47691	2.29335	1.34703	1.06507	0.72746	1.33936
1.76209	0.230071	-0.900054	5.25144	3.76865	1.33963	1.62651	0.702127	1.35755	5.25144	3.76865	1.33963
3.29393	-0.718467	-0.861865	0.273625	1.957	1.34897	1.72217	1.75886	1.35809	0.273625	1.957	1.34897
0.793872	-0.834284	-0.857657	0.92258	0.745427	1.35466	2.69292	2.06201	1.36208	0.92258	0.745427	1.35466
1.94856	1.15411	-0.848088	2.48406	1.19369	1.38206	1.4964	1.2031	1.37861	2.48406	1.19369	1.38206
-1.21957	-0.360061	-0.845747	2.1052	1.72084	1.38798	2.5135	2.32046	1.37993	2.1052	1.72084	1.38798
2.11701	1.22793	-0.845228	4.73025	-2.11314	1.38907	-0.476145	1.71887	1.38206	4.73025	-2.11314	1.38907
2.21982	-1.12764	-0.831742	1.25519	1.0503	1.39208	-2.04289	0.783203	1.38579	1.25519	1.0503	1.39208
3.72914	-0.66282	-0.831742	3.92625	2.39113	1.40612	1.58877	1.19369	1.38579	3.92625	2.39113	1.40612
0.915611	-0.639317	-0.831742	3.07531	2.75761	1.4064	1.48647	1.43434	1.38951	3.07531	2.75761	1.4064
1.60083	-0.453989	-0.831742	2.80979	0.791874	1.40894	2.71616	2.76854	1.39053	2.80979	0.791874	1.40894
4.02854	0.0196375	-0.831742	0.896178	1.91422	1.4126	1.17265	-0.728008	1.39584	0.896178	1.91422	1.4126
3.73136	0.434337	-0.831742	3.67866	1.98211	1.41337	1.35473	1.79004	1.39611	3.67866	1.98211	1.41337
1.6132	0.050312	-0.830299	2.72556	2.11559	1.41339	0.491168	0.963311	1.4064	2.72556	2.11559	1.41339
1.26874	0.794791	-0.820154	1.20344	2.65559	1.41405	1.2305	0.650532	1.40894	1.20344	2.65559	1.41405
3.62253	-2.06368	-0.814525	-0.138139	1.96296	1.41626	1.71388	1.73197	1.4126	-0.138139	1.96296	1.41626
3.92211	-1.09531	-0.814525	2.47237	1.66486	1.41863	1.24315	2.16899	1.4126	2.47237	1.66486	1.41863
2.30527	0.194285	-0.814525	2.42193	1.64156	1.42272	1.20443	0.406863	1.42309	2.42193	1.64156	1.42272
0.508585	1.60477	-0.814325	2.90473	2.14009	1.43122	1.61604	2.58968	1.42311	2.90473	2.14009	1.43122
-1.10424	-0.329081	-0.813082	4.12358	3.52604	1.4336	1.51801	1.34296	1.42568	4.12358	3.52604	1.4336
5.05305	-0.585504	-0.805537	3.57352	2.11015	1.43443	2.79089	1.60399	1.43277	3.57352	2.11015	1.43443
1.09705	-2.59867	-0.801482	2.91815	0.738451	1.47072	1.19764	2.06327	1.43752	2.91815	0.738451	1.47072
1.84184	-0.789446	-0.801123	2.62936	-0.15372	1.47542	2.38396	2.35363	1.43893	2.62936	-0.15372	1.47542
3.4418	1.50794	-0.800393	0.23727	0.695864	1.47583	0.512231	1.2737	1.44003	0.23727	0.695864	1.47583
3.81097	-1.09531	-0.797511	3.71761	2.06684	1.48258	1.58611	2.12665	1.44292	3.71761	2.06684	1.48258
2.49413	1.5557	-0.797511	3.14115	2.37432	1.50442	1.24315	1.48001	1.44966	3.14115	2.37432	1.50442
1.27674	1.16531	-0.796695	2.23388	2.01761	1.50806	2.2945	2.11621	1.45322	2.23388	2.01761	1.50806
1.25804	-0.20956	-0.789788	2.10917	3.14002	1.50826	2.61917	2.20054	1.46335	2.10917	3.14002	1.50826
0.298332	0.723016	-0.789788	1.51026	1.00015	1.50867	1.80934	1.56631	1.46479	1.51026	1.00015	1.50867
2.8199	0.791885	-0.788828	1.60013	1.64046	1.52402	1.91386	1.54034	1.46587	1.60013	1.64046	1.52402
2.05959	-0.299563	-0.781837	2.15627	1.90462	1.52754	0.7089	2.35013	1.46831	2.15627	1.90462	1.52754
1.06246	-1.40748	-0.778332	2.17097	1.41034	1.5278	1.60083	1.4907	1.47182	2.17097	1.41034	1.5278
2.20737	-2.39914	-0.769998	1.63095	1.93176	1.53182	1.90324	1.629	1.4729	1.63095	1.93176	1.53182
1.78431	-0.245854	-0.729855	1.70965	1.76748	1.53222	1.36994	1.32432	1.48097	1.70965	1.76748	1.53222
2.47751	2.30289	-0.728264	1.36311	0.333966	1.53842	0.723674	0.955663	1.48534	1.36311	0.333966	1.53842
-0.377741	-2.52244	-0.725258	3.17924	2.41823	1.53842	0.894314	1.08662	1.49471	3.17924	2.41823	1.53842
1.63814	-1.23855	-0.720826	0.00105111	1.81056	1.54792	2.23124	1.67886	1.49471	0.00105111	1.81056	1.54792
2.5118	1.06639	-0.719105	-0.181334	0.577144	1.55572	1.81408	1.52333	1.49815	-0.181334	0.577144	1.55572
2.56061	1.86329	-0.717423	2.43856	0.0343271	1.55835	0.498305	-2.61171	1.50503	2.43856	0.0343271	1.55835
2.21219	0.545872	-0.695681	2.9193	0.46324	1.55938	1.65082	2.18047	1.51996	2.9193	0.46324	1.55938
2.50174	-1.92285	-0.690917	3.24975	0.6684	1.56134	2.13894	1.76444	1.52636	3.24975	0.6684	1.56134
3.01447	0.177025	-0.686369	4.70199	2.52434	1.56165	2.07202	0.688254	1.52797	4.70199	2.52434	1.56165
2.09601	-1.03079	-0.682427	4.51364	2.31117	1.56984	1.2005	2.60947	1.52925	4.51364	2.31117	1.56984
1.0035	-1.00421	-0.674077	2.5342	2.29459	1.57687	1.59315	1.5506	1.52974	2.5342	2.29459	1.57687
2.53388	1.13397	-0.667833	0.702734	1.3067	1.58217	1.2361	1.7653	1.52974	0.702734	1.3067	1.58217
2.12413	-1.56957	-0.656907	1.2305	1.80133	1.58766	2.05876	2.08731	1.52974	1.2305	1.80133	1.58766
2.12961	0.22055	-0.63083	0.268195	1.69538	1.58796	1.61607	-0.478714	1.53981	0.268195	1.69538	1.58796
3.08263	0.78319	-0.620407	1.94995	1.4602	1.59084	1.084	0.914222	1.55835	1.94995	1.4602	1.59084
3.05877	-0.0366964	-0.616925	0.850614	2.38755	1.59835	2.21915	2.17659	1.55835	0.850614	2.38755	1.59835
2.29848	1.05534	-0.614151	2.84935	2.56152	1.60387	1.36994	1.17331	1.56064	2.84935	2.56152	1.60387
2.02619	0.206925	-0.594623	1.80534	2.08199	1.61744	1.51887	1.1133	1.56167	1.80534	2.08199	1.61744
4.31931	-1.04253	-0.581837	1.94829	1.70336	1.61833	1.39283	1.57234	1.56722	1.94829	1.70336	1.61833
2.96341	2.25419	-0.580204	2.08474	1.2737	1.64119	3.14285	2.98631	1.57866	2.08474	1.2737	1.64119
1.84309	0.499141	-0.571507	1.69043	2.18648	1.64119	1.82156	2.51236	1.57891	1.69043	2.18648	1.64119
1.90324	-2.61171	-0.566054	1.97044	-0.14178	1.64682	1.36739	1.29945	1.58217	1.97044	-0.14178	1.64682
2.41703	-1.34947	-0.566054	2.36671	2.1347	1.64742	1.4924	2.12585	1.58541	2.36671	2.1347	1.64742
3.61487	-0.521041	-0.566054	2.4356	1.2927	1.64889	1.823	1.58381	1.59234	2.4356	1.2927	1.64889
3.0561	1.1916	-0.563733	1.81674	1.35222	1.65394	1.7045	1.69706	1.59891	1.81674	1.35222	1.65394
1.74442	-0.433455	-0.561268	1.22902	3.00336	1.66676	0.744112	0.558306	1.60607	1.22902	3.00336	1.66676
1.13245	2.03163	-0.551554	1.71293	3.27712	1.66982	1.63467	1.42418	1.60837	1.71293	3.27712	1.66982
0.95966	-1.67559	-0.511406	2.75112	2.27153	1.67019	1.81497	0.348979	1.60879	2.75112	2.27153	1.67019
2.34951	-0.555142	-0.505919	1.80923	2.35305	1.67331	1.69702	2.98608	1.61342	1.80923	2.35305	1.67331
1.20729	0.956238	-0.489938	3.61161	2.06857	1.68886	1.49708	1.29945	1.61833	3.61161	2.06857	1.68886
1.00153	-1.60065	-0.455573	3.66244	1.45682	1.69489	2.04399	2.02549	1.61856	3.66244	1.45682	1.69489
2.07143	-2.61171	-0.451597	3.41544	2.4854	1.69499	1.38396	1.59922	1.6215	3.41544	2.4854	1.69499
2.35055	-2.61171	-0.451597	2.35952	0.670298	1.7018	1.56063	1.60437	1.62283	2.35952	0.670298	1.7018
1.64896	0.317146	-0.450921	1.5815	1.39605	1.71111	1.69868	1.93938	1.6318	1.5815	1.39605	1.71111
4.03502	-2.06368	-0.438349	1.63933	2.76943	1.71212	1.72094	1.91819	1.63494	1.63933	2.76943	1.71212
0.931335	-1.34947	-0.438349	1.94662	1.13611	1.7283	1.82997	1.33124	1.63807	1.94662	1.13611	1.7283
1.36092	1.027	-0.438349	2.1171	1.95122	1.72983	1.91561	1.85848	1.63807	2.1171	1.95122	1.72983
1.24037	1.38546	-0.438349	1.55087	1.68908	1.73575	1.90944	2.36209	1.63807	1.55087	1.68908	1.73575
-0.458219	0.363651	-0.437897	3.90016	1.66291	1.74174	1.97297	2.06141	1.64119	3.90016	1.66291	1.74174
4.93579	1.55644	-0.435353	1.43646	-0.0553159	1.74187	1.72199	2.36209	1.64431	1.43646	-0.0553159	1.74187
2.44542	1.08612	-0.429779	1.69543	1.86603	1.7438	0.715193	1.73957	1.65422	1.69543	1.86603	1.7438
1.65779	2.20403	-0.4282	5.51251	3.3012	1.74487	2.07061	2.27712	1.66156	5.51251	3.3012	1.74487
1.62151	-0.486679	-0.425306	1.45736	1.0081	1.75449	0.551739	1.97803	1.66468	1.45736	1.0081	1.75449
5.40831	0.762507	-0.41655	2.66858	2.28069	1.75494	1.50174	1.29335	1.66982	2.66858	2.28069	1.75494
1.97932	0.209253	-0.409155	2.35418	2.78704	1.75916	1.71871	1.67526	1.67254	2.35418	2.78704	1.75916
3.47484	0.713419	-0.407653	3.38796	1.70795	1.76273	2.96555	3.30408	1.68092	3.38796	1.70795	1.76273
2.3451	1.08161	-0.394685	1.79312	2.52356	1.7656	3.53924	2.31546	1.68549	1.79312	2.52356	1.7656
3.64511	0.422773	-0.391432	2.3736	3.16594	1.77304	2.12305	2.50593	1.68811	2.3736	3.16594	1.77304
1.50524	0.198241	-0.382473	1.24037	2.16899	1.78147	2.91432	2.45437	1.6886	1.24037	2.16899	1.78147
2.53264	2.11314	-0.375056	2.88861	2.50434	1.78502	1.32828	2.12309	1.68886	2.88861	2.50434	1.78502
-1.74471	-1.63705	-0.370885	3.72398	3.25752	1.78799	1.70784	2.2802	1.69188	3.72398	3.25752	1.78799
1.70297	1.83973	-0.360158	1.91036	2.26722	1.78907	2.20267	2.38658	1.69789	1.91036	2.26722	1.78907
2.22198	-1.31183	-0.345557	2.10662	1.79134	1.79168	1.50758	2.06803	1.69829	2.10662	1.79134	1.79168
0.495848	0.0343271	-0.345557	4.92184	3.02609	1.7924	0.974017	2.13689	1.69997	4.92184	3.02609	1.7924
2.06349	0.153265	-0.345557	2.16948	1.97518	1.79469	2.21415	1.95911	1.71155	2.16948	1.97518	1.79469
3.10529	0.801036	-0.345454	1.90513	0.346488	1.80811	-0.0634009	2.27403	1.71155	1.90513	0.346488	1.80811
1.86521	0.574177	-0.344192	1.09638	1.68951	1.80939	1.26265	1.97932	1.71452	1.09638	1.68951	1.80939
-1.05653	-2.61171	-0.333244	2.14362	2.70348	1.81776	1.63003	2.29945	1.71452	2.14362	2.70348	1.81776
0.217734	-2.06368	-0.333244	2.46827	3.3756	1.82608	1.9772	2.34309	1.71452	2.46827	3.3756	1.82608
1.46138	-0.521041	-0.333244	2.62132	2.12505	1.84051	2.61062	2.60143	1.71452	2.62132	2.12505	1.84051
1.8131	0.325283	-0.333244	1.47217	1.58334	1.84118	1.75173	2.17164	1.71692	1.47217	1.58334	1.84118
4.41684	1.31812	-0.333244	1.97169	1.4199	1.84156	1.49941	1.86751	1.71953	1.97169	1.4199	1.84156
3.18361	1.70885	-0.333244	3.16204	2.70801	1.84708	2.1632	2.00303	1.72538	3.16204	2.70801	1.84708
2.5663	-0.673669	-0.332514	2.90527	1.95636	1.85039	1.06987	2.01044	1.73591	2.90527	1.95636	1.85039
-0.516795	-0.329081	-0.331801	3.24224	2.9305	1.85175	2.69456	2.41907	1.73591	3.24224	2.9305	1.85175
1.26598	-0.672213	-0.331057	1.89795	2.85249	1.85272	0.469792	2.02299	1.73883	1.89795	2.85249	1.85272
0.870635	-1.95881	-0.329664	1.55374	1.45149	1.8568	2.36288	2.70357	1.73883	1.55374	1.45149	1.8568
2.3174	0.730928	-0.324783	0.86159	1.7445	1.85719	2.60248	2.04596	1.74174	0.86159	1.7445	1.85719
2.42196	0.660035	-0.321036	2.2695	1.92122	1.86314	-0.558701	2.11713	1.74424	2.2695	1.92122	1.86314
0.406223	0.915141	-0.320416	1.34533	0.110927	1.86884	3.23619	1.986	1.74463	1.34533	0.110927	1.86884
1.37004	-0.186464	-0.320201	1.8328	2.48993	1.88541	1.92957	2.76357	1.74603	1.8328	2.48993	1.88541
4.90941	-0.215353	-0.319592	1.90758	2.31072	1.8871	2.13224	1.95323	1.77095	1.90758	2.31072	1.8871
1.61498	-1.5855	-0.319352	4.76913	2.34079	1.88756	1.9948	2.55669	1.77131	4.76913	2.34079	1.88756
-0.452509	-1.11314	-0.318744	1.4519	1.90138	1.88912	0.574696	2.722	1.78428	1.4519	1.90138	1.88912
1.23538	0.584833	-0.317882	1.56834	1.8035	1.89365	1.82827	1.96468	1.7874	1.56834	1.8035	1.89365
2.47966	-0.811383	-0.312353	2.34951	1.91662	1.89477	1.62835	2.79336	1.79443	2.34951	1.91662	1.89477
4.7502	0.644178	-0.310973	2.56508	2.52356	1.90002	-2.03276	0.981101	1.80483	2.56508	2.52356	1.90002
2.03632	-2.4804	-0.307036	2.06034	2.72972	1.90522	1.22769	1.24692	1.80661	2.06034	2.72972	1.90522
2.97558	-1.5716	-0.305432	3.29276	2.26795	1.90644	1.6225	1.96714	1.80661	3.29276	2.26795	1.90644
2.87272	0.898643	-0.302158	1.36604	2.19369	1.90961	3.52011	1.89153	1.80666	1.36604	2.19369	1.90961
3.61862	0.989845	-0.302158	3.35876	4.06159	1.92551	1.084	2.30882	1.80747	3.35876	4.06159	1.92551
1.92048	-0.705909	-0.297524	4.46545	3.2515	1.92961	1.07925	2.52927	1.81302	4.46545	3.2515	1.92961
2.54666	0.25572	-0.297144	2.26296	1.8203	1.93422	1.89971	1.91422	1.8177	2.26296	1.8203	1.93422
2.40344	0.615366	-0.295238	3.68538	3.38898	1.93453	1.06599	2.21748	1.82217	3.68538	3.38898	1.93453
5.69414	1.16476	-0.293361	0.559772	2.48181	1.94007	2.52501	1.53138	1.82586	0.559772	2.48181	1.94007
1.02076	0.464296	-0.28961	2.29718	1.8502	1.9425	1.51454	2.0119	1.83027	2.29718	1.8502	1.9425
-0.522371	-1.06378	-0.283811	2.95395	2.69571	1.95882	2.24315	2.18977	1.83217	2.95395	2.69571	1.95882
2.72198	-0.976842	-0.283339	0.804976	2.47791	1.96749	2.94714	2.06569	1.83301	0.804976	2.47791	1.96749
4.7933	-0.387562	-0.266817	2.75651	2.4277	1.97075	1.8027	2.11621	1.83301	2.75651	2.4277	1.97075
2.31669	0.914947	-0.253975	-0.483897	0.974697	1.97219	2.86255	2.33097	1.83301	-0.483897	0.974697	1.97219
3.82584	1.48925	-0.248595	3.88653	2.42507	1.97433	1.50528	2.46254	1.83301	3.88653	2.42507	1.97433
2.58328	1.19381	-0.247043	2.69893	2.2225	1.97712	1.38115	1.14914	1.83658	2.69893	2.2225	1.97712
-2.0703	-0.639317	-0.24678	2.34987	2.0409	1.97884	1.22487	1.80478	1.83763	2.34987	2.0409	1.97884
1.31871	-0.222555	-0.245928	4.19213	2.86401	1.97995	1.72199	3.0548	1.83846	4.19213	2.86401	1.97995
2.1784	-2.01828	-0.236198	2.55597	2.31988	1.98544	2.99767	2.82808	1.85272	2.55597	2.31988	1.98544
1.71694	-1.31183	-0.235279	1.79412	1.86671	1.98623	2.96639	1.27435	1.85542	1.79412	1.86671	1.98623
1.82058	-1.09531	-0.235279	3.90401	2.32651	1.99449	1.23331	2.06787	1.85542	3.90401	2.32651	1.99449
2.21557	-0.686712	-0.235279	3.82624	1.01733	1.99592	2.11259	2.13129	1.85542	3.82624	1.01733	1.99592
4.36542	-0.686712	-0.235279	3.19604	2.06931	1.99767	2.35846	1.96932	1.86058	3.19604	2.06931	1.99767
1.70678	-0.330524	-0.235279	1.90925	0.354075	2.00232	1.90324	1.65436	1.86078	1.90925	0.354075	2.00232
0.52843	-0.199507	-0.235279	2.81276	2.54357	2.00502	2.44405	2.95506	1.86078	2.81276	2.54357	2.00502
2.64261	1.55669	-0.235279	1.33805	2.47763	2.01964	2.36402	1.86213	1.86164	1.33805	2.47763	2.01964
2.18724	0.0610385	-0.232445	2.52713	0.582692	2.02164	2.65016	2.82123	1.86244	2.52713	0.582692	2.02164
2.60516	-1.09097	-0.230944	2.36092	2.09365	2.02389	2.76143	2.4277	1.86613	2.36092	2.09365	2.02389
2.40246	-0.747819	-0.230093	-0.0565322	1.79272	2.02463	0.619357	2.84293	1.87513	-0.0565322	1.79272	2.02463
1.48866	0.0254199	-0.229496	1.80458	1.31211	2.02867	2.37524	2.14024	1.8765	1.80458	1.31211	2.02867
1.47816	-1.09531	-0.223869	1.89165	1.66212	2.02902	2.89483	2.87384	1.87748	1.89165	1.66212	2.02902
2.41638	-0.846735	-0.223869	2.95004	2.84674	2.03197	1.49941	1.2406	1.88013	2.95004	2.84674	2.03197
2.93829	-1.32766	-0.213474	2.13815	3.90896	2.03416	1.89971	1.47847	1.88013	2.13815	3.90896	2.03416
2.78272	0.670469	-0.213474	1.90632	-0.238382	2.04008	1.64665	2.32486	1.88145	1.90632	-0.238382	2.04008
2.15561	2.06129	-0.213138	1.78829	2.23438	2.05721	0.720943	0.930019	1.88277	1.78829	2.23438	2.05721
1.3983	-0.307254	-0.212009	2.00928	2.15183	2.0612	1.72399	2.40108	1.88277	2.00928	2.15183	2.0612
2.96323	-0.536898	-0.206766	1.22077	2.49962	2.06169	2.31395	2.61859	1.88277	1.22077	2.49962	2.06169
0.232495	-2.0985	-0.206132	4.33004	3.2035	2.06916	2.67207	3.11932	1.88277	4.33004	3.2035	2.06916
3.19048	-0.470757	-0.204591	1.88091	2.88075	2.07061	2.22928	2.52773	1.88312	1.88091	2.88075	2.07061
2.8434	-1.31442	-0.200232	0.863709	2.70452	2.07158	1.2305	1.88093	1.88541	0.863709	2.70452	2.07158
1.67482	1.19212	-0.199859	2.46165	2.97259	2.0726	1.74688	2.24123	1.88631	2.46165	2.97259	2.0726
2.85974	2.08024	-0.196875	2.43427	2.55669	2.07524	1.42283	1.7415	1.88779	2.43427	2.55669	2.07524
1.6434	-1.28121	-0.193249	2.81492	2.92719	2.08081	0.720943	2.11621	1.88804	2.81492	2.92719	2.08081
2.01877	-0.0368858	-0.188591	0.254245	1.87161	2.08735	1.91223	2.60993	1.89	0.254245	1.87161	2.08735
0.449153	1.1987	-0.186811	2.29986	3.20912	2.09779	1.65622	2.31761	1.89879	2.29986	3.20912	2.09779
3.11617	0.20317	-0.173964	3.04711	2.31414	2.09825	2.55806	2.75217	1.90327	3.04711	2.31414	2.09825
2.42665	0.087222	-0.170974	2.2319	2.38944	2.1039	2.60624	2.41487	1.90531	2.2319	2.38944	2.1039
1.31725	-0.119407	-0.164419	2.9909	1.57939	2.10406	0.523837	2.43107	1.90605	2.9909	1.57939	2.10406
3.50664	1.35738	-0.158888	1.69761	1.66476	2.11068	2.01152	2.19802	1.90696	1.69761	1.66476	2.11068
0.537509	0.72071	-0.15708	0.872618	2.2358	2.11896	2.80458	2.67045	1.90702	0.872618	2.2358	2.11896
2.05049	0.444349	-0.153654	4.18409	3.35667	2.12187	1.89252	1.88976	1.90859	4.18409	3.35667	2.12187
1.90593	-0.66282	-0.151016	-2.17134	1.21445	2.1225	2.44289	2.20519	1.90876	-2.17134	1.21445	2.1225
-0.0371099	-0.0578938	-0.145234	1.73299	2.40728	2.1225	1.06507	2.45139	1.9122	1.73299	2.40728	2.1225
0.93548	1.80628	-0.145234	2.54989	2.78343	2.12602	1.59096	0.273137	1.92398	2.54989	2.78343	2.12602
1.95543	1.86849	-0.113886	1.04121	1.86396	2.13446	0.92258	1.56078	1.92398	1.04121	1.86396	2.13446
1.95683	-0.721728	-0.110272	1.92506	2.50271	2.13452	1.97888	2.24753	1.92654	1.92506	2.50271	2.13452
-0.379098	-0.717001	-0.105545	1.69231	1.96889	2.13634	1.51339	2.78921	1.92976	1.69231	1.96889	2.13634
2.26339	0.370755	-0.101922	1.74281	2.6361	2.14115	0.932211	2.00023	1.93088	1.74281	2.6361	2.14115
4.09599	-0.244008	-0.0989299	1.71694	2.68606	2.14374	2.05586	2.00701	1.93156	1.71694	2.68606	2.14374
1.5909	0.354221	-0.0938212	1.59271	2.61999	2.14653	1.54742	2.70589	1.93746	1.59271	2.61999	2.14653
2.28733	0.566482	-0.0855591	2.30993	1.71051	2.14946	2.84049	3.51867	1.93883	2.30993	1.71051	2.14946
3.09327	1.90851	-0.0782695	2.22792	3.27959	2.14946	2.08581	1.53357	1.9399	2.22792	3.27959	2.14946
1.67333	0.885517	-0.0705291	1.69594	2.28168	2.15834	1.58877	1.81499	1.9425	1.69594	2.28168	2.15834
1.87279	-1.09531	-0.0643334	3.4926	1.56446	2.16091	1.72797	2.19011	1.9425	3.4926	1.56446	2.16091
3.67326	-0.54268	-0.0643334	4.24331	2.55567	2.16644	2.37823	2.09784	1.94503	4.24331	2.55567	2.16644
5.68868	-0.499722	-0.0643334	2.76207	1.90501	2.16827	1.68946	2.32618	1.94503	2.76207	1.90501	2.16827
1.69761	0.0488686	-0.0643334	0.262652	2.09014	2.1797	-0.982288	1.89854	1.94512	0.262652	2.09014	2.1797
1.59315	0.906258	-0.0643334	-0.42837	1.51678	2.1855	2.00062	1.8099	1.94756	-0.42837	1.51678	2.1855
2.71605	0.433692	-0.0622848	2.46085	2.41977	2.1856	0.702734	2.88441	1.95182	2.46085	2.41977	2.1856
4.37465	-0.0450933	-0.0541939	2.66684	3.45928	2.18613	2.28905	1.74096	1.95259	2.66684	3.45928	2.18613
2.00182	-1.28524	-0.0533101	2.81991	2.64962	2.18613	2.10801	2.73039	1.96079	2.81991	2.64962	2.18613
2.28315	1.92477	-0.0502467	3.15015	2.72392	2.18719	2.10297	1.57311	1.96245	3.15015	2.72392	2.18719
4.09946	1.47676	-0.0498339	0.712925	2.32411	2.19947	2.38336	2.11275	1.96328	0.712925	2.32411	2.19947
2.10883	-0.478396	-0.0394441	2.2199	1.11843	2.20756	1.69017	1.70055	1.96412	2.2199	1.11843	2.20756
1.49136	1.55291	-0.0360927	1.14164	1.89577	2.21581	1.09393	1.00987	1.96488	1.14164	1.89577	2.21581
-0.963777	-0.335119	-0.0163076	3.30803	2.93639	2.22182	2.01707	2.24815	1.96578	3.30803	2.93639	2.22182
2.65681	1.75971	-0.0144869	2.61819	2.10084	2.22703	1.6063	1.6198	1.96827	2.61819	2.10084	2.22703
3.65535	0.313593	-0.0114385	2.67681	2.17213	2.2289	2.30591	2.46874	1.96827	2.67681	2.17213	2.2289
1.81216	0.242715	0.00387298	1.51992	1.50305	2.23077	1.35835	2.6012	1.96827	1.51992	1.50305	2.23077
1.48294	0.281638	0.00890026	4.02627	2.33517	2.23211	2.5917	3.3716	1.96989	4.02627	2.33517	2.23211
1.08585	0.383481	0.0122518	1.94556	2.34647	2.2324	1.49941	1.91782	1.97075	1.94556	2.34647	2.2324
3.19233	-0.846735	0.0174349	2.93888	2.2124	2.2333	2.43183	2.32443	1.97075	2.93888	2.2124	2.2333
1.48288	0.754327	0.0174349	3.85001	3.01509	2.23342	3.02489	2.35517	1.97188	3.85001	3.01509	2.23342
1.58542	-1.61171	0.0270176	3.32293	3.90873	2.23753	1.9981	2.60072	1.97323	3.32293	3.90873	2.23753
2.36671	-0.846735	0.0270176	3.47811	3.40105	2.25263	2.15478	2.08088	1.97402	3.47811	3.40105	2.25263
-0.508832	-0.199507	0.0270176	4.93654	1.8884	2.2553	2.52092	3.24476	1.97712	4.93654	1.8884	2.2553
2.6658	-0.0763129	0.0270176	2.22056	2.23425	2.2558	2.37161	2.95785	1.97785	2.22056	2.23425	2.2558
2.52877	1.19369	0.0270176	4.09876	1.74947	2.26985	1.28636	2.28271	1.97789	4.09876	1.74947	2.26985
1.23758	1.29335	0.0270176	1.67261	2.60572	2.27337	2.5212	2.20017	1.98131	1.67261	2.60572	2.27337
0.57574	-0.241257	0.0350735	3.83164	2.61644	2.28086	0.742867	2.58036	1.98377	3.83164	2.61644	2.28086
-0.467009	0.374553	0.0365371	3.52	3.51319	2.28145	1.52035	2.47092	1.98453	3.52	3.51319	2.28145
2.20192	1.83314	0.0384542	2.79834	1.20167	2.28278	2.23471	2.53495	1.98868	2.79834	1.20167	2.28278
3.84811	0.327787	0.0415172	0.448095	2.08662	2.29819	0.478877	2.01478	1.99056	0.448095	2.08662	2.29819
0.809596	-0.388806	0.0465825	1.0985	2.10149	2.29823	2.06507	2.42437	1.99113	1.0985	2.10149	2.29823
2.01412	0.0824381	0.0510044	1.97976	2.26098	2.30016	2.08474	2.80837	1.99113	1.97976	2.26098	2.30016
4.29636	-0.451369	0.0598069	2.54601	2.29987	2.30327	2.57011	3.11965	1.99358	2.54601	2.29987	2.30327
1.65416	1.60567	0.0598948	2.42629	2.77405	2.30917	2.08626	2.66212	1.99636	2.42629	2.77405	2.30917
3.18744	0.0589895	0.0632381	3.59229	2.06547	2.3112	0.62761	1.73621	1.99721	3.59229	2.06547	2.3112
1.05298	1.09667	0.0733012	1.33799	1.45322	2.32071	1.26714	2.14612	1.99737	1.33799	1.45322	2.32071
2.68214	0.396958	0.0781612	2.80722	2.60537	2.33078	2.45193	2.76884	2.00154	2.80722	2.60537	2.33078
4.43496	0.15063	0.0948163	2.95368	2.50899	2.34571	2.37121	2.64699	2.00229	2.95368	2.50899	2.34571
0.237576	0.362962	0.0948163	1.41504	2.28081	2.34953	2.65003	2.88643	2.00472	1.41504	2.28081	2.34953
1.72239	-0.818622	0.0962597	4.09177	3.0265	2.35541	1.10564	3.0667	2.00533	4.09177	3.0265	2.35541
3.53149	0.942188	0.0991509	2.06568	3.8314	2.35684	1.99393	2.43325	2.0064	2.06568	3.8314	2.35684
3.86526	-0.846735	0.1039	3.28004	2.42826	2.35924	2.3551	2.46498	2.00882	3.28004	2.42826	2.35924
-1.04289	0.57736	0.1039	3.08808	1.56459	2.38362	2.77697	3.01921	2.01557	3.08808	1.56459	2.38362
1.49941	0.620749	0.1039	2.24014	3.04467	2.38377	2.60531	2.93883	2.0163	2.24014	3.04467	2.38377
3.32775	1.27988	0.1039	4.65172	3.20422	2.38639	1.0757	1.99914	2.01845	4.65172	3.20422	2.38639
2.16358	-1.17485	0.110288	2.28681	2.4042	2.39071	1.38541	2.15666	2.0198	2.28681	2.4042	2.39071
2.77699	-1.61171	0.112927	2.11757	2.41755	2.39319	3.00055	2.67611	2.02282	2.11757	2.41755	2.39319
1.22769	-0.0606187	0.112927	1.14059	3.11559	2.39637	2.47517	1.69505	2.02463	1.14059	3.11559	2.39637
2.16816	1.22326	0.118034	3.68955	2.92502	2.39718	1.90768	2.69324	2.02463	3.68955	2.92502	2.39718
2.7725	-0.832235	0.1184	3.52294	2.62375	2.40027	2.14271	2.79272	2.02628	3.52294	2.62375	2.40027
4.64889	0.915167	0.123374	1.38396	2.23425	2.4126	2.82391	2.26722	2.02702	1.38396	2.23425	2.4126
0.54293	-0.485223	0.127427	3.30416	2.0681	2.41408	1.99645	1.13026	2.0294	3.30416	2.0681	2.41408
1.36708	-0.547223	0.133032	2.24315	2.91621	2.41443	2.06507	2.32501	2.03179	2.24315	2.91621	2.41443
-0.563106	-1.07204	0.136197	3.14496	2.4406	2.4146	2.89748	2.65627	2.03179	3.14496	2.4406	2.4146
1.42833	-0.161501	0.141907	2.80979	2.96104	2.41912	2.37376	2.52356	2.03343	2.80979	2.96104	2.41912
2.40886	0.0987735	0.144721	2.39554	2.50229	2.42419	4.28667	3.29405	2.03587	2.39554	2.50229	2.42419
-0.126886	2.20411	0.145906	2.41763	2.37548	2.42572	2.10053	1.59956	2.03663	2.41763	2.37548	2.42572
3.18062	1.66379	0.147423	3.8865	2.68654	2.42822	1.66516	3.17368	2.03899	3.8865	2.68654	2.42822
4.21005	0.662804	0.150586	2.22496	1.843	2.42883	2.06904	2.36847	2.04191	2.22496	1.843	2.42883
3.10365	1.10864	0.154966	3.89422	3.04221	2.43323	1.9981	2.99084	2.04427	3.89422	3.04221	2.43323
2.48179	1.63631	0.159971	0.60271	2.02168	2.43676	1.59315	1.6886	2.0459	0.60271	2.02168	2.43676
3.58598	-0.0177538	0.160933	5.99709	3.77142	2.43722	2.18398	2.21326	2.04648	5.99709	3.77142	2.43722
1.16896	1.99529	0.162575	3.15696	3.511	2.44035	2.37121	3.30233	2.04663	3.15696	3.511	2.44035
3.88179	-0.413018	0.16287	0.279036	2.35626	2.44383	1.65824	1.20067	2.04666	0.279036	2.35626	2.44383
4.33377	2.389	0.168274	2.4988	2.67137	2.45779	2.61007	1.87265	2.05331	2.4988	2.67137	2.45779
1.8827	-2.12764	0.170912	3.78514	2.25576	2.45966	2.73523	3.19715	2.0607	3.78514	2.25576	2.45966
1.80478	0.769799	0.17404	3.66155	2.00677	2.46083	2.43798	1.83567	2.06203	3.66155	2.00677	2.46083
3.37244	3.39923	0.179589	2.52622	2.71512	2.4625	1.73046	2.39658	2.06347	2.52622	2.71512	2.4625
1.39686	1.52557	0.182319	3.66095	2.55661	2.46327	3.02622	2.66432	2.06783	3.66095	2.55661	2.46327
1.27148	-0.00234041	0.185457	2.37569	2.3067	2.47114	2.49529	2.35626	2.06829	2.37569	2.3067	2.47114
4.8583	-0.499722	0.185475	2.41638	3.52598	2.47279	2.31395	2.67673	2.06829	2.41638	3.52598	2.47279
1.57882	1.04887	0.185475	3.54166	2.91853	2.47866	2.40955	2.47414	2.07293	3.54166	2.91853	2.47866
2.32357	-0.470304	0.18981	1.60083	2.44562	2.48036	2.31728	2.54668	2.07343	1.60083	2.44562	2.48036
2.16058	0.922142	0.194007	2.29022	1.47046	2.48509	1.38323	1.81423	2.07726	2.29022	1.47046	2.48509
2.56154	0.425367	0.198342	1.70071	2.73779	2.49025	1.80934	2.11898	2.08506	1.70071	2.73779	2.49025
1.73144	0.702674	0.199975	4.74133	4.55197	2.49182	1.2134	2.45438	2.08506	4.74133	4.55197	2.49182
1.2632	2.09514	0.200012	4.461	2.39531	2.49357	1.38698	2.70587	2.08511	4.461	2.39531	2.49357
3.47557	2.71326	0.208272	3.9684	3.3623	2.50286	2.75897	2.84463	2.08735	3.9684	3.3623	2.50286
1.64183	-0.223936	0.211453	1.85429	2.43261	2.50497	2.72147	2.96121	2.08735	1.85429	2.43261	2.50497
1.32426	-0.577353	0.213259	1.95939	2.50847	2.51393	2.81595	2.69137	2.08964	1.95939	2.50847	2.51393
2.92731	1.26958	0.214816	3.10197	2.82596	2.51505	2.43232	2.39474	2.09046	3.10197	2.82596	2.51505
5.12614	1.10842	0.215812	2.89948	3.4119	2.51685	1.48882	1.46768	2.09192	2.89948	3.4119	2.51685
6.28452	1.16884	0.222323	2.65901	3.41305	2.51743	1.83649	1.78715	2.09192	2.65901	3.41305	2.51743
4.91087	3.28677	0.227151	4.16429	2.7649	2.51814	1.40612	1.77108	2.09313	4.16429	2.7649	2.51814
1.74079	1.26236	0.230089	3.23437	3.13759	2.52083	2.52181	2.71061	2.09479	3.23437	3.13759	2.52083
1.73108	-0.849436	0.231675	2.37121	3.75782	2.52083	1.22632	1.39942	2.09565	2.37121	3.75782	2.52083
2.24834	0.212028	0.234583	2.93039	2.35349	2.52291	0.738744	2.04775	2.09704	2.93039	2.35349	2.52291
2.76872	-0.199507	0.248883	3.3622	1.88499	2.52636	3.02212	1.74735	2.09797	3.3622	1.88499	2.52636
2.3622	0.15063	0.248883	3.18245	3.017	2.52637	1.603	2.42546	2.10459	3.18245	3.017	2.52637
2.47697	0.260698	0.248883	2.2305	3.01822	2.53742	1.74338	2.22965	2.10534	2.2305	3.01822	2.53742
2.45678	0.720732	0.249984	3.95998	2.22967	2.54037	2.08792	2.76927	2.10616	3.95998	2.22967	2.54037
3.19958	0.0955384	0.256347	1.61176	2.04162	2.54694	1.7439	2.43656	2.11068	1.61176	2.04162	2.54694
3.3422	3.12216	0.257525	1.29133	2.56158	2.55299	2.8667	2.62697	2.11339	1.29133	2.56158	2.55299
3.26122	1.1742	0.260129	1.99975	3.43918	2.55734	3.25209	2.76871	2.11884	1.99975	3.43918	2.55734
2.44717	0.813549	0.268785	1.78885	3.18957	2.56208	2.02357	2.8169	2.12473	1.78885	3.18957	2.56208
1.88678	0.73418	0.269747	3.31067	2.75765	2.56609	2.54591	1.52954	2.12764	3.31067	2.75765	2.56609
3.09853	0.381768	0.271703	2.25853	3.90831	2.57081	0.510193	2.04449	2.12818	2.25853	3.90831	2.57081
3.86128	1.31824	0.272413	2.06192	2.62298	2.58492	2.94029	2.01858	2.12987	2.06192	2.62298	2.58492
-0.919799	1.79702	0.278556	3.00929	3.75075	2.58557	2.0466	2.8536	2.13372	3.00929	3.75075	2.58557
3.67033	1.11498	0.279393	1.89694	2.70175	2.58774	2.88945	2.03471	2.13933	1.89694	2.70175	2.58774
0.221814	0.307861	0.280413	1.08237	2.76947	2.59505	1.71894	2.32528	2.13933	1.08237	2.76947	2.59505
2.86069	-0.699188	0.291602	2.54988	3.68128	2.60468	2.07613	1.76135	2.14153	2.54988	3.68128	2.60468
2.26721	1.69499	0.296545	3.1668	3.17891	2.61017	2.37587	2.57054	2.14298	3.1668	3.17891	2.61017
1.46717	-0.224274	0.300257	2.01068	2.63827	2.61081	3.11256	2.82001	2.14441	2.01068	2.63827	2.61081
1.91338	0.112256	0.302377	2.36799	2.95488	2.61357	1.82626	2.53702	2.14746	2.36799	2.95488	2.61357
4.18795	0.330347	0.306974	2.27886	2.73892	2.61626	2.00495	2.85353	2.15027	2.27886	2.73892	2.61626
1.40146	2.78327	0.306974	3.91929	3.36966	2.61857	2.52445	2.11282	2.15385	3.91929	3.36966	2.61857
1.49117	-2.61171	0.30721	2.35039	2.72255	2.61983	2.88151	2.66972	2.15746	2.35039	2.72255	2.61983
5.63382	-0.66282	0.30721	2.20531	1.98725	2.61989	2.00391	1.96714	2.15748	2.20531	1.98725	2.61989
3.32145	1.30607	0.30721	2.91349	2.39607	2.62054	1.68634	2.36443	2.15815	2.91349	2.39607	2.62054
2.26682	0.70177	0.307345	3.35551	3.46855	2.62237	1.71894	1.93938	2.15966	3.35551	3.46855	2.62237
1.0524	0.303395	0.30982	4.56377	3.88127	2.62238	0.934786	2.37972	2.15966	4.56377	3.88127	2.62238
1.82067	-0.0763129	0.315053	2.73405	3.83448	2.62297	2.41326	1.58833	2.16032	2.73405	3.83448	2.62297
3.00352	0.939381	0.315053	2.17356	2.61927	2.62385	2.77167	2.17327	2.16183	2.17356	2.61927	2.62385
1.52593	0.627007	0.316845	2.89812	2.01756	2.62619	2.70093	2.52514	2.16732	2.89812	2.01756	2.62619
1.07925	-1.61171	0.322855	2.7058	3.16261	2.62621	2.92465	2.40718	2.1781	2.7058	3.16261	2.62621
4.99911	1.08662	0.322855	3.09835	1.74401	2.62728	0.912114	1.8188	2.17821	3.09835	1.74401	2.62728
2.01465	1.4851	0.324627	2.1	3.13347	2.63174	2.66213	2.71273	2.17821	2.1	3.13347	2.63174
2.6442	0.959667	0.327167	5.32341	3.07445	2.63679	1.07275	1.34713	2.18259	5.32341	3.07445	2.63679
0.916574	0.523139	0.345536	3.29831	2.83727	2.63836	2.08319	3.0625	2.19376	3.29831	2.83727	2.63836
1.77452	0.885774	0.345673	0.560524	2.34452	2.64407	3.00136	3.25275	2.1942	0.560524	2.34452	2.64407
2.24188	0.820404	0.347143	1.99215	1.42334	2.64409	1.99975	2.07568	2.19588	1.99215	1.42334	2.64409
2.34322	1.01796	0.348095	3.71517	3.2322	2.64938	2.56697	2.46104	2.19781	3.71517	3.2322	2.64938
5.84363	1.0591	0.34906	2.60248	3.4507	2.64938	2.2911	2.23077	2.198	2.60248	3.4507	2.64938
2.73652	0.982582	0.35053	1.58323	2.19759	2.65403	1.98896	2.98501	2.19947	1.58323	2.19759	2.65403
0.43605	0.37871	0.355337	0.89575	1.89998	2.65753	2.64793	1.5557	2.20012	0.89575	1.89998	2.65753
-0.503493	0.793839	0.355622	2.33551	2.35265	2.66316	2.30324	2.61371	2.20012	2.33551	2.35265	2.66316
2.41439	0.579288	0.359255	1.96235	3.59198	2.6632	-1.24447	2.37822	2.20119	1.96235	3.59198	2.6632
2.9163	0.582938	0.361077	1.83465	3.41445	2.66569	2.11536	2.24815	2.20582	1.83465	3.41445	2.66569
1.07747	0.943671	0.361625	1.36348	3.053	2.66829	2.09	2.68384	2.20659	1.36348	3.053	2.66829
1.37039	-0.30998	0.362343	2.73776	2.77669	2.6707	1.56476	1.06033	2.21033	2.73776	2.77669	2.6707
2.24017	-0.272124	0.365372	1.69572	1.41841	2.67385	2.93329	2.84582	2.21077	1.69572	1.41841	2.67385
3.28781	1.53478	0.365858	3.03889	2.63039	2.67452	2.16058	2.46604	2.21543	3.03889	2.63039	2.67452
2.89986	2.96538	0.367374	2.27055	2.68811	2.67648	2.06349	2.5511	2.21543	2.27055	2.68811	2.67648
3.04233	1.62734	0.367562	3.14114	2.97191	2.67726	2.98769	2.61174	2.21543	3.14114	2.97191	2.67726
3.8203	2.54141	0.372491	3.49306	1.95959	2.67771	2.08506	2.98269	2.21653	3.49306	1.95959	2.67771
1.89969	0.618242	0.373974	2.01132	2.14115	2.67937	2.41326	1.97062	2.21753	2.01132	2.14115	2.67937
2.23907	0.981642	0.375157	1.61062	2.43434	2.68089	2.29316	2.04596	2.21753	1.61062	2.43434	2.68089
3.85775	0.123408	0.378322	4.1369	3.11448	2.69384	2.00969	1.42213	2.21962	4.1369	3.11448	2.69384
2.63327	0.137083	0.378322	3.60269	3.70019	2.69454	2.34858	1.89307	2.22171	3.60269	3.70019	2.69454
2.91474	0.791874	0.378322	2.97506	2.34249	2.70614	1.21056	2.48831	2.22171	2.97506	2.34249	2.70614
4.49405	1.48557	0.379593	4.56759	1.33091	2.7074	2.29678	2.29709	2.22186	4.56759	1.33091	2.7074
1.88508	0.728903	0.379765	3.9799	3.60304	2.71058	1.22925	2.0503	2.22202	3.9799	3.60304	2.71058
2.41575	0.906166	0.380007	4.50111	1.92792	2.71264	2.72394	2.7673	2.22379	4.50111	1.92792	2.71264
2.09257	-0.474638	0.385789	2.79891	2.3974	2.71699	2.55213	2.69137	2.22851	2.79891	2.3974	2.71699
-1.41026	-0.187437	0.385849	4.24379	2.07923	2.7185	1.81223	1.64247	2.22996	4.24379	2.07923	2.7185
1.29852	1.41821	0.387528	0.541582	2.26697	2.72335	2.49708	1.15867	2.23058	0.541582	2.26697	2.72335
2.99244	1.71945	0.388503	2.01459	2.00338	2.72627	1.48882	1.82808	2.23058	2.01459	2.00338	2.72627
2.93565	1.51353	0.392211	2.08474	3.29016	2.72774	2.70932	2.94734	2.23058	2.08474	3.29016	2.72774
1.24334	0.870636	0.393021	2.54663	2.50286	2.73187	2.62036	2.82619	2.23472	2.54663	2.50286	2.73187
4.26816	0.182823	0.396106	3.01499	2.60339	2.73232	2.96466	3.26752	2.23472	3.01499	2.60339	2.73232
2.4013	1.22202	0.400126	4.33619	3.24474	2.73581	1.81497	1.99443	2.23679	4.33619	3.24474	2.73581
3.4542	0.970542	0.40045	1.38396	1.93317	2.73838	2.15164	3.04126	2.23679	1.38396	1.93317	2.73838
0.802197	0.784445	0.402629	2.39409	3.07372	2.73838	4.64548	3.38901	2.23704	2.39409	3.07372	2.73838
2.89303	0.892551	0.407468	1.23478	2.49046	2.73984	2.38016	2.04887	2.24297	1.23478	2.49046	2.73984
1.45405	1.0408	0.409572	1.12703	2.42892	2.75131	2.33812	2.76003	2.24415	1.12703	2.42892	2.75131
2.69585	1.34371	0.409753	4.40875	4.14146	2.75677	-0.112444	2.70756	2.24437	4.40875	4.14146	2.75677
1.58596	0.777279	0.415013	2.22476	3.20369	2.75726	2.55892	2.32143	2.2462	2.22476	3.20369	2.75726
3.06517	-0.667969	0.419987	3.44092	2.83695	2.76213	1.03948	1.95947	2.24763	3.44092	2.83695	2.76213
-1.92665	1.03656	0.421577	1.8027	3.06285	2.76317	1.38298	2.3164	2.24777	1.8027	3.06285	2.76317
3.87527	0.0841035	0.422946	4.1322	2.44233	2.77088	1.99393	2.38259	2.24967	4.1322	2.44233	2.77088
2.71999	1.64796	0.424798	2.45545	2.85095	2.77314	2.09257	2.3351	2.25376	2.45545	2.85095	2.77314
1.66572	1.49204	0.42558	1.92523	3.19205	2.77596	1.34667	2.16263	2.25721	1.92523	3.19205	2.77596
-0.488222	0.270255	0.431064	2.61714	2.94308	2.77738	0.627298	1.77466	2.25953	2.61714	2.94308	2.77738
1.73101	-1.34947	0.431735	5.13181	2.79654	2.78066	2.75514	1.78016	2.25955	5.13181	2.79654	2.78066
2.69799	1.0589	0.437783	3.04008	2.90236	2.78345	0.477024	1.58459	2.26099	3.04008	2.90236	2.78345
4.99753	-0.833691	0.444778	2.92699	2.93465	2.78723	0.436894	1.48059	2.26268	2.92699	2.93465	2.78723
5.51015	-0.846735	0.446092	2.36024	2.96505	2.79232	3.5289	3.20865	2.26307	2.36024	2.96505	2.79232
2.37442	0.137083	0.446092	2.34224	2.43192	2.79694	2.48052	2.6539	2.26447	2.34224	2.43192	2.79694
3.49413	0.912667	0.446092	0.94689	3.1675	2.7983	1.71588	2.26471	2.26509	0.94689	3.1675	2.7983
3.28427	0.536523	0.449652	2.54079	2.59007	2.80249	1.91561	2.2768	2.26851	2.54079	2.59007	2.80249
-0.6359	1.4526	0.451838	2.18076	4.32315	2.8029	2.0933	3.10705	2.26851	2.18076	4.32315	2.8029
3.47875	0.587356	0.453218	3.146	2.91202	2.80714	1.9112	2.76735	2.27176	3.146	2.91202	2.80714
2.43305	0.716611	0.453218	1.54988	3.14836	2.80892	2.68699	2.29556	2.27699	1.54988	3.14836	2.80892
1.36127	1.32869	0.454889	2.34822	2.42405	2.81052	2.29655	2.07143	2.28573	2.34822	2.42405	2.81052
3.51147	2.10851	0.457216	2.43235	2.9926	2.81283	2.01785	1.98764	2.28772	2.43235	2.9926	2.81283
2.38486	-1.29878	0.459135	3.53031	2.42546	2.82263	2.31395	2.54804	2.28772	3.53031	2.42546	2.82263
2.47165	3.19442	0.46604	2.58987	3.25615	2.82263	2.89212	2.86506	2.2911	2.58987	3.25615	2.82263
3.4944	0.448836	0.467718	2.96008	3.5989	2.82994	2.52056	2.59346	2.29236	2.96008	3.5989	2.82994
2.30467	2.13878	0.467943	0.968692	3.35113	2.83235	1.71588	2.41682	2.30016	0.968692	3.35113	2.83235
2.31615	-0.782059	0.469741	2.61442	2.73241	2.83846	2.19262	1.93316	2.30017	2.61442	2.73241	2.83846
2.66209	0.370727	0.47094	3.3274	2.97932	2.8394	0.268134	1.73285	2.30077	3.3274	2.97932	2.8394
1.85496	0.805869	0.474918	2.94903	2.73844	2.84624	2.47517	2.66384	2.30153	2.94903	2.73844	2.84624
2.26777	-1.50079	0.481731	1.24394	2.73505	2.85648	3.6117	3.01858	2.30153	1.24394	2.73505	2.85648
3.40494	0.965264	0.48299	3.55069	3.06332	2.85761	3.03764	2.81753	2.30214	3.55069	3.06332	2.85761
1.92734	-0.787972	0.485312	1.87638	1.78639	2.86037	2.31192	2.1415	2.30744	1.87638	1.78639	2.86037
2.75538	0.824175	0.487064	2.45936	2.87189	2.86047	3.18906	2.81264	2.31054	2.45936	2.87189	2.86047
3.08128	0.62652	0.488359	3.72868	2.68291	2.86077	2.15735	1.87949	2.31082	3.72868	2.68291	2.86077
1.64454	-0.635313	0.490331	5.8781	2.92463	2.86508	1.71987	1.71453	2.31239	5.8781	2.92463	2.86508
3.55564	2.79724	0.495379	3.39497	3.27331	2.87055	2.06657	3.05174	2.3156	3.39497	3.27331	2.87055
2.67207	0.669476	0.499211	3.7108	2.70702	2.87428	2.15312	2.81328	2.31641	3.7108	2.70702	2.87428
2.2149	1.33718	0.499211	4.50875	3.09763	2.87501	2.85709	2.56937	2.31832	4.50875	3.09763	2.87501
1.97499	-0.274633	0.501984	4.10847	3.6862	2.87639	2.15164	2.63671	2.31836	4.10847	3.6862	2.87639
1.19476	-0.311261	0.502938	3.28141	3.35106	2.87789	2.54822	2.8369	2.31836	3.28141	3.35106	2.87789
1.85109	1.67361	0.504685	2.74634	3.01425	2.87867	2.71086	2.96084	2.32031	2.74634	3.01425	2.87867
2.46621	0.840904	0.506482	3.24889	3.3651	2.88736	0.940348	2.73519	2.32429	3.24889	3.3651	2.88736
1.08978	-0.892733	0.509782	3.27258	3.23661	2.89307	3.42941	3.45533	2.32931	3.27258	3.23661	2.89307
2.82471	-1.29878	0.51014	2.53673	2.81765	2.89543	2.4348	2.71638	2.32984	2.53673	2.81765	2.89543
2.29245	1.48432	0.510822	3.02832	2.16601	2.90352	1.35442	2.14924	2.33113	3.02832	2.16601	2.90352
2.5811	0.598327	0.510987	2.81413	3.09102	2.9058	2.54817	2.80175	2.33247	2.81413	3.09102	2.9058
1.96922	1.4473	0.511002	3.02994	2.79834	2.90702	2.85887	2.67091	2.33307	3.02994	2.79834	2.90702
5.00928	-2.06079	0.51371	2.91648	2.85168	2.90702	2.76337	3.38602	2.3344	2.91648	2.85168	2.90702
1.76491	0.374617	0.519695	3.60765	3.01756	2.90844	1.80458	1.65911	2.33633	3.60765	3.01756	2.90844
1.94176	0.191829	0.521405	2.00304	3.14825	2.90906	2.09175	2.70566	2.33633	2.00304	3.14825	2.90906
1.55756	0.674324	0.523133	1.05074	2.62415	2.91384	2.31924	3.12891	2.33633	1.05074	2.62415	2.91384
0.251626	-0.289781	0.524417	2.37376	3.0436	2.91463	1.63327	2.59503	2.33692	2.37376	3.0436	2.91463
1.66093	-1.30246	0.525934	2.00883	2.53777	2.91974	1.91119	2.32443	2.33826	2.00883	2.53777	2.91974
0.680313	0.6849	0.525934	4.74583	3.0442	2.92448	2.42918	1.96585	2.34115	4.74583	3.0442	2.92448
2.17155	-1.03222	0.529366	2.55102	2.85664	2.92661	1.84848	2.52333	2.3421	2.55102	2.85664	2.92661
4.6739	-2.04144	0.532293	2.88858	2.81797	2.93374	2.54876	1.47952	2.34512	2.88858	2.81797	2.93374
2.4199	2.43344	0.535278	2.77187	3.13091	2.93599	1.71799	2.18024	2.34645	2.77187	3.13091	2.93599
5.3434	0.489183	0.537792	1.47157	2.76132	2.94184	2.61391	2.24753	2.34645	1.47157	2.76132	2.94184
1.23074	-0.275282	0.538917	4.45412	2.93176	2.94187	2.37569	2.92253	2.34703	4.45412	2.93176	2.94187
2.41635	-0.146184	0.543653	3.04907	2.92243	2.94371	2.8483	2.24564	2.34993	3.04907	2.92243	2.94371
1.45323	1.90209	0.543653	3.66619	3.15768	2.94915	2.50174	2.73647	2.35408	3.66619	3.15768	2.94915
0.355654	1.02727	0.544427	5.76075	1.54034	2.95293	2.16551	2.69641	2.35525	5.76075	1.54034	2.95293
3.7541	0.423381	0.54651	2.7344	1.83231	2.95918	2.85207	2.6127	2.35552	2.7344	1.83231	2.95918
1.72797	0.583444	0.549519	-0.355301	2.47422	2.9613	1.61567	2.5453	2.35887	-0.355301	2.47422	2.9613
2.39302	0.0193667	0.551217	2.60465	2.52978	2.96328	1.62576	2.60833	2.36087	2.60465	2.52978	2.96328
3.17629	-0.0413976	0.555642	1.93743	2.99277	2.96459	2.28172	2.44793	2.36153	1.93743	2.99277	2.96459
2.95708	0.0824292	0.559738	3.94861	3.97012	2.96473	2.22272	1.46226	2.36276	3.94861	3.97012	2.96473
0.491168	0.800493	0.561651	2.70327	2.82978	2.96578	2.77116	1.65436	2.36276	2.70327	2.82978	2.96578
0.647554	2.62255	0.566841	5.15028	4.63401	2.96591	2.4835	2.8348	2.36276	5.15028	4.63401	2.96591
4.1517	0.22349	0.567839	4.38105	3.22744	2.96796	2.76633	2.96159	2.36596	4.38105	3.22744	2.96796
0.894438	-0.535449	0.568882	3.4267	3.74971	2.97274	2.0659	2.34014	2.36654	3.4267	3.74971	2.97274
0.330435	0.761618	0.575817	2.66003	3.25936	2.98421	1.71902	2.90148	2.36737	2.66003	3.25936	2.98421
0.940552	-0.113143	0.57615	4.94381	3.09996	2.98995	2.30613	2.41635	2.37132	4.94381	3.09996	2.98995
3.22924	1.09285	0.581148	2.5368	2.66923	2.99588	2.07401	2.74987	2.37809	2.5368	2.66923	2.99588
5.81235	0.917019	0.581991	2.07403	1.53063	2.99675	2.82249	2.69645	2.37832	2.07403	1.53063	2.99675
1.17309	1.0826	0.582692	3.25452	3.4192	2.99916	1.59647	2.57713	2.3789	3.25452	3.4192	2.99916
3.26446	0.253179	0.583311	2.88219	3.82233	3.00412	2.36159	2.74586	2.37962	2.88219	3.82233	3.00412
1.87199	1.56076	0.583311	3.29347	2.94198	3.00593	0.498736	1.95815	2.38064	3.29347	2.94198	3.00593
1.16499	0.0693098	0.58387	2.47695	2.74329	3.01258	2.06891	3.05048	2.38164	2.47695	2.74329	3.01258
2.75984	-0.617389	0.593835	2.37983	2.78622	3.0151	3.46812	2.61358	2.38368	2.37983	2.78622	3.0151
1.9274	-0.208167	0.606031	3.11927	3.47894	3.01512	2.41202	2.59082	2.38393	3.11927	3.47894	3.01512
3.55308	1.32163	0.607746	1.5925	2.90764	3.01772	2.15538	2.63599	2.38522	1.5925	2.90764	3.01772
5.85276	-0.453989	0.608793	2.2911	2.54548	3.01795	2.21699	3.27218	2.38579	2.2911	2.54548	3.01795
2.9037	0.0802918	0.608793	3.4306	3.12291	3.01831	2.39593	2.17073	2.38695	3.4306	3.12291	3.01831
2.21777	-0.0507955	0.613726	3.66161	3.19759	3.02071	2.07061	2.22118	2.39186	3.66161	3.19759	3.02071
2.66043	1.41664	0.615096	2.77314	3.5706	3.02155	2.048	2.14748	2.39293	2.77314	3.5706	3.02155
2.17338	2.23268	0.615984	2.91672	3.04676	3.02255	2.54591	2.55365	2.39371	2.91672	3.04676	3.02255
3.2948	1.8337	0.616214	4.31169	3.04011	3.02322	1.91211	2.18713	2.39428	4.31169	3.04011	3.02322
3.33729	2.10062	0.618342	2.7134	3.40418	3.02702	2.00969	3.29275	2.39428	2.7134	3.40418	3.02702
2.43163	0.944682	0.61996	2.61305	2.56092	3.0336	2.56227	2.13062	2.39557	2.61305	2.56092	3.0336
2.73406	-0.627729	0.620381	3.74944	3.81782	3.03747	1.8131	2.38602	2.39557	3.74944	3.81782	3.03747
1.41321	0.977744	0.622381	1.81283	1.74836	3.04119	0.889857	-0.651549	2.39909	1.81283	1.74836	3.04119
2.3023	0.249427	0.625952	3.47242	2.86744	3.04208	2.1539	2.68673	2.39926	3.47242	2.86744	3.04208
4.92354	0.134996	0.626748	2.84346	3.27727	3.05158	2.56508	2.31844	2.4011	2.84346	3.27727	3.05158
5.64329	-2.09702	0.633017	0.720547	2.64381	3.05211	0.512231	1.82808	2.40294	0.720547	2.64381	3.05211
3.08607	1.18287	0.6338	2.65481	2.81513	3.05845	2.40889	3.18666	2.40294	2.65481	2.81513	3.05845
2.26228	0.961568	0.643369	4.80706	3.88465	3.06039	2.55084	3.18723	2.40722	4.80706	3.88465	3.06039
2.11299	0.0664207	0.647254	2.69354	2.52616	3.06284	2.37823	2.70816	2.40951	2.69354	2.52616	3.06284
-1.17598	-1.71739	0.647542	4.66596	3.81505	3.06287	2.40202	1.9545	2.41078	4.66596	3.81505	3.06287
2.35017	-0.629251	0.64873	3.49996	1.57586	3.06345	2.29584	2.50395	2.41134	3.49996	1.57586	3.06345
0.97329	-0.250485	0.648878	1.92788	3.0305	3.06945	2.15156	2.64702	2.41183	1.92788	3.0305	3.06945
1.82395	-0.44187	0.652685	0.703724	2.65131	3.06947	2.12985	1.51287	2.4126	0.703724	2.65131	3.06947
0.56242	-1.02295	0.653101	3.74788	3.65299	3.06962	2.30296	2.11128	2.41529	3.74788	3.65299	3.06962
2.75585	1.49669	0.654606	2.35055	3.45806	3.07061	2.17017	2.92609	2.41626	2.35055	3.45806	3.07061
5.58292	0.961631	0.654649	2.54365	2.61078	3.07555	1.71388	2.82072	2.41808	2.54365	2.61078	3.07555
5.43781	1.1509	0.655578	2.71842	3.03615	3.08051	2.00226	2.82155	2.4199	2.71842	3.03615	3.08051
1.87834	1.05605	0.657632	4.13876	4.61836	3.08092	1.95074	2.59422	2.42138	4.13876	4.61836	3.08092
2.38329	-1.61171	0.660613	2.77915	2.62347	3.08184	2.60738	2.07568	2.42276	2.77915	2.62347	3.08184
2.5362	0.783203	0.660613	2.88332	2.8803	3.0827	2.37569	2.02666	2.42457	2.88332	2.8803	3.0827
1.72224	1.04865	0.665021	2.80175	3.34027	3.08361	3.61363	2.95315	2.42457	2.80175	3.34027	3.08361
3.06766	1.50421	0.665021	3.94905	2.36037	3.08421	2.5368	3.00858	2.42945	3.94905	2.36037	3.08421
1.74179	1.08523	0.666035	3.39063	2.94999	3.08538	2.32458	3.58909	2.42945	3.39063	2.94999	3.08538
2.61715	1.61627	0.669295	2.54988	2.79661	3.0877	1.72094	2.96313	2.43305	2.54988	2.79661	3.0877
1.23619	1.08951	0.669644	2.06747	3.1989	3.08964	2.15586	2.75877	2.43507	2.06747	3.1989	3.08964
-0.145408	1.57834	0.672873	3.55291	3.90985	3.09525	2.23684	2.05712	2.43665	3.55291	3.90985	3.09525
1.03084	0.696087	0.673769	3.85257	3.46901	3.09976	2.66372	2.58535	2.43714	3.85257	3.46901	3.09976
2.32961	1.63963	0.674784	4.29206	2.90493	3.10021	2.21557	2.49336	2.43769	4.29206	2.90493	3.10021
0.818258	1.00644	0.675616	3.9013	3.69415	3.10424	2.00555	2.15597	2.44307	3.9013	3.69415	3.10424
3.4612	-0.216797	0.678964	2.55272	3.13452	3.10425	1.82626	2.39229	2.44307	2.55272	3.13452	3.10425
2.43619	1.27668	0.679067	1.07135	2.45356	3.10764	2.16283	2.8677	2.44307	1.07135	2.45356	3.10764
2.32395	1.35823	0.680175	3.66936	3.86566	3.10798	2.54419	3.11793	2.44307	3.66936	3.86566	3.10798
3.92344	1.28696	0.681945	3.08371	3.74724	3.11088	1.58391	2.78807	2.44416	3.08371	3.74724	3.11088
2.09521	-0.314566	0.682714	3.91679	3.46707	3.11504	3.06337	2.71932	2.44436	3.91679	3.46707	3.11504
1.73762	1.02077	0.686355	1.52044	2.31907	3.1232	2.68915	3.05066	2.44469	1.52044	2.31907	3.1232
3.43812	0.199765	0.68947	2.16145	2.74278	3.13019	2.67468	3.30624	2.44485	2.16145	2.74278	3.13019
2.05583	1.88352	0.691099	2.61227	3.74417	3.13427	2.48052	2.56151	2.44664	2.61227	3.74417	3.13427
2.7332	-0.121658	0.69254	2.71923	4.54532	3.14129	1.89748	2.64705	2.44706	2.71923	4.54532	3.14129
2.71344	3.51561	0.69254	2.2113	2.37223	3.14131	2.72123	2.9188	2.44856	2.2113	2.37223	3.14131
2.13548	0.40807	0.695244	2.6051	3.54876	3.1418	2.44684	2.62628	2.45141	2.6051	3.54876	3.1418
2.88614	1.04056	0.697169	2.38396	2.93097	3.14657	1.7556	3.25753	2.45166	2.38396	2.93097	3.14657
2.14916	1.41894	0.706112	3.42812	2.79446	3.1478	1.36348	1.92214	2.45322	3.42812	2.79446	3.1478
6.33527	1.60099	0.7075	1.88542	2.86791	3.14953	2.37188	3.63526	2.45424	1.88542	2.86791	3.14953
2.12149	0.893778	0.707534	2.6218	3.09415	3.15609	2.64525	2.79215	2.45803	2.6218	3.09415	3.15609
3.60143	1.85281	0.707777	2.65821	2.58762	3.15838	1.84184	2.80513	2.45826	2.65821	2.58762	3.15838
3.41636	1.8106	0.709399	4.19235	3.35889	3.16542	2.41491	3.01426	2.45953	4.19235	3.35889	3.16542
1.31422	-0.429469	0.710205	2.99645	3.41753	3.16651	2.65218	3.08293	2.46255	2.99645	3.41753	3.16651
2.85432	1.46768	0.710636	4.2044	3.2803	3.16744	3.07929	2.04596	2.46309	4.2044	3.2803	3.16744
2.49827	1.62576	0.713204	1.41563	3.33661	3.16784	1.38432	2.95777	2.46367	1.41563	3.33661	3.16784
0.52766	0.635322	0.716433	2.34986	3.5691	3.16853	1.24037	2.07992	2.46608	2.34986	3.5691	3.16853
4.79736	1.74011	0.716736	1.81969	3.48378	3.16896	2.42442	1.97136	2.4706	1.81969	3.48378	3.16896
3.32534	1.34986	0.716919	3.21193	1.84493	3.17176	2.67	3.27046	2.47114	3.21193	1.84493	3.17176
1.39464	2.18405	0.717062	2.41876	3.8172	3.17223	3.21467	3.36047	2.47203	2.41876	3.8172	3.17223
1.54393	-0.286059	0.717853	2.41326	3.48912	3.17329	0.25715	1.91819	2.4729	2.41326	3.48912	3.17329
3.15449	1.09962	0.719176	2.89259	3.8993	3.17755	0.920933	0.931556	2.47411	2.89259	3.8993	3.17755
3.20775	2.4384	0.721124	1.86093	3.46713	3.18026	2.42751	2.08662	2.4764	1.86093	3.46713	3.18026
1.3878	-1.31183	0.72248	1.81782	3.38728	3.18493	2.42138	2.09715	2.47936	1.81782	3.38728	3.18493
2.05634	2.95526	0.72248	5.75156	4.68457	3.18634	1.99062	2.72928	2.48384	5.75156	4.68457	3.18634
3.24478	2.70702	0.724651	3.04009	3.37307	3.18781	2.23404	2.26098	2.48505	3.04009	3.37307	3.18781
3.27494	1.76897	0.725885	3.55006	3.39134	3.18845	2.87839	3.05551	2.48558	3.55006	3.39134	3.18845
3.9446	0.264109	0.726593	2.28841	3.18533	3.19707	2.3012	1.57736	2.48852	2.28841	3.18533	3.19707
1.80906	-0.63082	0.726737	4.41205	3.84278	3.19724	2.07519	2.87509	2.48876	4.41205	3.84278	3.19724
1.67562	1.67712	0.728097	2.6788	3.09958	3.19874	1.72986	2.77278	2.49047	2.6788	3.09958	3.19874
0.727031	1.42213	0.728366	5.84815	5.16375	3.20186	2.94459	2.70466	2.49058	5.84815	5.16375	3.20186
3.32805	2.14746	0.730554	3.47555	3.58733	3.20496	2.06904	2.88296	2.49198	3.47555	3.58733	3.20496
1.74921	1.63221	0.731673	2.2319	3.48805	3.20537	2.6279	1.51287	2.49544	2.2319	3.48805	3.20537
1.70188	1.02514	0.732416	4.13277	3.48684	3.20853	3.0778	2.02377	2.49608	4.13277	3.48684	3.20853
2.18173	0.790438	0.732528	2.83909	3.26597	3.21124	1.99975	2.88604	2.49815	2.83909	3.26597	3.21124
2.56517	1.12287	0.740757	4.19214	3.71816	3.21257	2.44032	1.99775	2.50064	4.19214	3.71816	3.21257
1.50316	1.224	0.741725	4.93495	2.92862	3.21334	2.02313	1.90176	2.50091	4.93495	2.92862	3.21334
2.16119	0.563913	0.742395	2.85978	2.9015	3.21543	2.73398	3.17809	2.50107	2.85978	2.9015	3.21543
2.12743	1.4199	0.742938	2.35055	3.39527	3.21753	2.57565	2.45142	2.50222	2.35055	3.39527	3.21753
0.627497	1.22127	0.744934	2.02186	5.09921	3.22973	1.35835	2.15531	2.50331	2.02186	5.09921	3.22973
2.33397	0.880606	0.746053	3.94638	4.17162	3.2308	1.97465	2.24815	2.50331	3.94638	4.17162	3.2308
3.26287	0.728605	0.746504	2.4882	3.11621	3.23544	2.2446	2.80982	2.50423	2.4882	3.11621	3.23544
2.84969	2.35417	0.746613	2.8469	3.02533	3.2357	2.99014	2.63694	2.50448	2.8469	3.02533	3.2357
-0.137804	1.80978	0.754072	3.65953	3.74917	3.24119	2.22695	1.5557	2.51233	3.65953	3.74917	3.24119
0.877456	1.16207	0.754539	2.60024	3.27874	3.24224	2.67207	2.92647	2.51573	2.60024	3.27874	3.24224
1.81742	-0.173302	0.754571	2.7624	3.16584	3.24325	4.03377	2.6956	2.51634	2.7624	3.16584	3.24325
2.35252	-0.54268	0.75499	1.80809	4.32984	3.24676	1.03948	1.91896	2.51743	1.80809	4.32984	3.24676
3.54142	0.323807	0.757559	4.11417	3.18589	3.25208	3.14193	3.62125	2.51743	4.11417	3.18589	3.25208
2.74764	1.36389	0.757577	3.43457	2.68666	3.25428	1.82011	1.79587	2.5202	3.43457	2.68666	3.25428
2.96491	1.68789	0.757577	2.11232	3.37294	3.25435	2.30324	2.93255	2.52083	2.11232	3.37294	3.25435
0.191857	0.502347	0.758982	2.87603	3.22928	3.25607	2.85336	2.95719	2.52083	2.87603	3.22928	3.25607
4.79438	1.11207	0.760635	2.17163	2.60786	3.25761	2.05059	3.02536	2.52345	2.17163	2.60786	3.25761
2.42687	0.57736	0.760745	1.0985	2.75053	3.25846	2.41261	2.73936	2.52467	1.0985	2.75053	3.25846
0.887207	-1.06368	0.764721	2.66294	2.83998	3.261	1.91211	3.62307	2.52467	2.66294	2.83998	3.261
-2.17134	-0.499722	0.764721	1.47217	3.55987	3.27084	2.21415	2.58263	2.52636	1.47217	3.55987	3.27084
2.01245	1.7936	0.767797	2.82997	3.62766	3.27185	2.66476	2.70771	2.52974	2.82997	3.62766	3.27185
3.14271	0.699909	0.769354	3.1167	4.13231	3.27284	2.36092	2.86094	2.52974	3.1167	4.13231	3.27284
2.75247	1.12423	0.769825	3.61629	3.48507	3.27293	2.4145	2.8188	2.5331	3.61629	3.48507	3.27293
3.16454	2.74229	0.770374	3.12038	2.96826	3.27541	2.59974	3.01415	2.53362	3.12038	2.96826	3.27541
1.2615	-0.272851	0.771331	2.7624	3.57624	3.27985	1.60733	2.53569	2.53407	2.7624	3.57624	3.27985
3.64674	2.07606	0.771881	4.37984	3.42541	3.28208	2.42831	2.78052	2.53454	4.37984	3.42541	3.28208
2.39629	1.26564	0.772353	2.44964	3.64947	3.28325	2.70172	2.32827	2.53478	2.44964	3.64947	3.28325
2.05422	1.10062	0.772939	3.16991	3.65307	3.28368	2.77699	2.73936	2.53742	3.16991	3.65307	3.28368
2.6543	0.899881	0.773633	3.97243	3.33273	3.28443	1.89076	2.36847	2.54193	3.97243	3.33273	3.28443
4.21755	0.587494	0.774856	3.63049	4.1092	3.28631	2.58877	2.82978	2.54244	3.63049	4.1092	3.28631
0.259283	0.0959499	0.776205	1.19504	2.91588	3.29236	2.49351	2.8626	2.54244	1.19504	2.91588	3.29236
2.32522	-0.977218	0.7807	4.27734	3.35316	3.29365	1.76817	2.64729	2.543	4.27734	3.35316	3.29365
-0.394797	-2.01361	0.780791	2.71287	2.88662	3.29887	1.39688	3.13294	2.54353	2.71287	2.88662	3.29887
3.32008	1.08033	0.782232	3.93591	3.77634	3.30473	2.23203	1.97054	2.54369	3.93591	3.77634	3.30473
3.48373	0.866057	0.786926	3.77747	1.93684	3.30854	2.30794	3.16965	2.54745	3.77747	1.93684	3.30854
2.72924	1.37797	0.790315	4.41737	3.88707	3.30961	2.59383	2.24566	2.54801	4.41737	3.88707	3.30961
3.2944	-0.991581	0.790505	3.50006	3.8397	3.30994	3.07773	2.8306	2.5486	3.50006	3.8397	3.30994
2.57701	2.54311	0.79099	3.84917	3.63252	3.31167	2.3622	2.87384	2.5486	3.84917	3.63252	3.31167
3.12888	1.60558	0.793042	3.84797	3.85055	3.31442	2.62557	2.61318	2.54889	3.84797	3.85055	3.31442
3.45375	0.271086	0.793491	2.79909	3.77685	3.31494	3.11133	2.75805	2.55192	2.79909	3.77685	3.31494
0.241966	0.294141	0.793691	2.74871	3.49541	3.31641	3.03117	2.10133	2.55358	2.74871	3.49541	3.31641
1.25248	1.14973	0.795328	3.52259	3.25481	3.31753	1.91561	2.18289	2.55619	3.52259	3.25481	3.31753
2.07068	0.0315011	0.798221	4.47029	4.31551	3.31815	2.98182	3.33201	2.55619	4.47029	4.31551	3.31815
1.12995	1.46127	0.800047	2.23331	3.40842	3.3267	0.71694	3.59044	2.55619	2.23331	3.40842	3.3267
3.01482	0.670807	0.802649	2.98194	2.81738	3.32793	2.90779	2.35393	2.55763	2.98194	2.81738	3.32793
1.94805	1.81863	0.802921	3.63742	3.13282	3.33729	2.07769	3.22278	2.55784	3.63742	3.13282	3.33729
3.86317	3.75505	0.803541	2.14193	3.11086	3.33796	1.25027	2.25502	2.55887	2.14193	3.11086	3.33796
4.03814	-0.0659519	0.806177	4.27404	3.68374	3.34211	1.86424	2.86599	2.56074	4.27404	3.68374	3.34211
4.38902	1.96204	0.806393	3.61924	3.23215	3.34411	2.89525	3.13352	2.56114	3.61924	3.23215	3.34411
2.82156	1.21318	0.807468	4.37157	3.16445	3.34481	3.03412	1.95648	2.56624	4.37157	3.16445	3.34481
1.25635	1.12294	0.808048	2.38542	3.30704	3.34526	2.4306	2.86956	2.57144	2.38542	3.30704	3.34526
5.20366	0.369274	0.808225	4.01029	4.32466	3.34762	1.97684	2.48915	2.58031	4.01029	4.32466	3.34762
2.69057	0.44139	0.808293	2.33307	2.82358	3.34875	2.41013	2.85826	2.58329	2.33307	2.82358	3.34875
2.37774	0.234448	0.808911	4.39436	3.01069	3.35156	0.385055	3.29286	2.58341	4.39436	3.01069	3.35156
1.97555	0.406913	0.809185	3.25898	2.4076	3.35413	2.65268	2.71318	2.58977	3.25898	2.4076	3.35413
5.20544	1.59314	0.81325	2.44311	3.87731	3.35444	2.23824	2.90967	2.59666	2.44311	3.87731	3.35444
2.61075	0.616021	0.813783	4.65063	3.84615	3.3609	2.44998	3.27065	2.59779	4.65063	3.84615	3.3609
0.922892	2.30296	0.814768	2.66572	3.50268	3.36178	2.91862	3.65504	2.60104	2.66572	3.50268	3.36178
1.1098	0.478511	0.814999	3.82547	4.06881	3.36534	2.66891	2.76927	2.60308	3.82547	4.06881	3.36534
4.38804	1.64917	0.815333	3.37569	3.50804	3.37965	2.09609	1.88853	2.60581	3.37569	3.50804	3.37965
2.67097	0.966949	0.82095	2.29718	3.06822	3.38206	2.80603	2.53959	2.60765	2.29718	3.06822	3.38206
1.55911	0.247873	0.821159	4.24857	2.68841	3.38427	2.0187	2.66666	2.61039	4.24857	2.68841	3.38427
3.46123	2.5809	0.829894	2.49674	3.82151	3.38444	3.5069	3.44227	2.6105	2.49674	3.82151	3.38444
3.39834	1.53233	0.832396	4.17392	2.8671	3.38951	3.03344	2.23775	2.61251	4.17392	2.8671	3.38951
2.28308	1.05201	0.832576	2.72797	3.87344	3.39215	1.70582	2.36209	2.61357	2.72797	3.87344	3.39215
1.90713	-0.954264	0.83896	2.30238	3.20986	3.3923	2.13965	2.58013	2.61357	2.30238	3.20986	3.3923
3.25726	1.02726	0.839561	2.81733	3.0852	3.40411	2.75209	3.11225	2.61357	2.81733	3.0852	3.40411
3.19993	1.50315	0.840004	2.49234	3.69369	3.40503	2.01297	3.33034	2.61458	2.49234	3.69369	3.40503
2.47035	1.78336	0.841562	3.29785	3.50209	3.40898	1.72797	2.69645	2.61467	3.29785	3.50209	3.40898
2.6238	1.16662	0.841576	2.78689	4.39549	3.41129	2.84971	3.31557	2.61626	2.78689	4.39549	3.41129
1.792	-1.52244	0.842488	2.80567	3.62559	3.41627	2.61714	3.21365	2.61675	2.80567	3.62559	3.41627
2.14994	1.62447	0.842812	2.64346	3.50522	3.41705	3.33006	2.83731	2.61785	2.64346	3.50522	3.41705
1.89431	1.65053	0.848984	2.44394	3.55397	3.41833	2.07613	2.69324	2.61943	2.44394	3.55397	3.41833
1.89431	1.93632	0.848984	5.06709	3.80047	3.41923	2.16128	2.51601	2.62101	5.06709	3.80047	3.41923
2.40129	0.62583	0.849543	1.74783	3.9173	3.42042	2.58877	3.33153	2.62302	1.74783	3.9173	3.42042
3.65382	-2.12764	0.852724	2.97314	4.05933	3.42116	2.1464	2.60315	2.6246	2.97314	4.05933	3.42116
1.6279	-0.521041	0.852724	3.60028	3.48218	3.42314	2.00226	1.79619	2.62775	3.60028	3.48218	3.42314
0.744937	0.123408	0.852724	3.72534	4.17181	3.42341	1.99645	2.29885	2.62932	3.72534	4.17181	3.42341
0.505982	0.359114	0.85746	3.30412	3.75915	3.42492	2.06978	2.76684	2.62981	3.30412	3.75915	3.42492
3.29919	0.313288	0.858103	3.17876	2.95546	3.42694	2.43427	2.91027	2.62981	3.17876	2.95546	3.42694
4.80281	2.46891	0.860572	0.92791	2.98133	3.43162	2.22769	2.80754	2.6309	0.92791	2.98133	3.43162
4.16387	0.381046	0.86126	3.52255	3.72768	3.43655	3.80808	2.26308	2.63154	3.52255	3.72768	3.43655
3.23568	1.06096	0.86175	4.46305	3.87738	3.43945	2.44475	3.32098	2.63414	4.46305	3.87738	3.43945
0.269578	0.873051	0.864905	3.04611	3.81519	3.44076	2.86479	2.72951	2.63542	3.04611	3.81519	3.44076
2.71141	0.839303	0.866348	2.37315	4.01303	3.44245	2.23655	2.1406	2.63636	2.37315	4.01303	3.44245
2.67046	-0.673669	0.871146	1.98239	3.15289	3.44493	2.60083	2.863	2.6365	1.98239	3.15289	3.44493
2.72387	1.68516	0.872525	3.0945	3.36584	3.44941	1.98143	2.97307	2.6365	3.0945	3.36584	3.44941
2.65186	0.64472	0.876654	1.91006	2.6391	3.45068	2.50756	2.9664	2.63782	1.91006	2.6391	3.45068
1.76845	0.59072	0.879248	3.7145	3.14141	3.45075	2.4835	2.98915	2.63807	3.7145	3.14141	3.45075
1.24082	-0.906856	0.8793	0.435842	3.37884	3.45195	2.9506	3.29458	2.63807	0.435842	3.37884	3.45195
3.78454	0.0998338	0.879801	1.91659	3.49645	3.45734	0.704178	2.94608	2.63951	1.91659	3.49645	3.45734
2.18674	1.06189	0.881342	3.10843	3.48179	3.45984	3.34023	3.01894	2.63963	3.10843	3.48179	3.45984
2.0276	0.932463	0.884308	4.63656	3.88119	3.46207	2.50967	2.17706	2.64064	4.63656	3.88119	3.46207
2.33015	-1.08519	0.889782	3.11209	3.93058	3.47125	2.66364	2.79639	2.64258	3.11209	3.93058	3.47125
2.18223	1.52697	0.893293	2.06081	3.67705	3.47315	2.7022	2.72455	2.64275	2.06081	3.67705	3.47315
0.428518	0.629822	0.893848	3.58225	4.31251	3.47871	3.33729	3.32537	2.6453	3.58225	4.31251	3.47871
2.31192	1.0329	0.896604	2.94919	3.48561	3.48159	1.07613	1.86831	2.64831	2.94919	3.48561	3.48159
2.4013	0.482785	0.898826	3.82448	3.53883	3.48411	2.49646	2.39824	2.65093	3.82448	3.53883	3.48411
3.47856	1.22318	0.899034	2.09646	3.73545	3.48531	2.14867	2.67112	2.65248	2.09646	3.73545	3.48531
1.61916	1.65108	0.900607	3.54468	3.74261	3.49262	2.22275	2.71735	2.65393	3.54468	3.74261	3.49262
3.79661	0.896678	0.907021	3.14605	3.46105	3.49361	2.13262	3.04628	2.65395	3.14605	3.46105	3.49361
1.98859	0.931251	0.907878	3.07163	3.5216	3.49948	1.69354	2.30335	2.65403	3.07163	3.5216	3.49948
1.8775	1.67254	0.909929	4.69357	3.29872	3.50268	3.39397	3.17493	2.65403	4.69357	3.29872	3.50268
0.707363	1.28856	0.910504	3.63127	3.59689	3.50417	1.99393	2.91641	2.6545	3.63127	3.59689	3.50417
-0.315513	0.907314	0.912855	3.82662	3.69991	3.50562	2.69584	3.43573	2.65502	3.82662	3.69991	3.50562
2.74378	0.210522	0.916644	2.8757	3.33541	3.50733	2.66684	2.75761	2.65557	2.8757	3.33541	3.50733
2.72745	0.445371	0.917363	1.24037	3.4277	3.51184	2.89837	3.31183	2.65557	1.24037	3.4277	3.51184
3.58239	2.14807	0.925309	4.19199	4.62962	3.51419	2.5111	2.62414	2.66001	4.19199	4.62962	3.51419
0.536968	1.32418	0.926559	0.267024	2.409	3.51578	2.61462	3.24672	2.66019	0.267024	2.409	3.51578
3.80829	1.35548	0.927555	3.0033	3.8656	3.51582	2.42751	2.21411	2.66108	3.0033	3.8656	3.51582
3.01035	1.03588	0.928379	4.12594	3.74262	3.51632	1.91386	2.68561	2.66215	4.12594	3.74262	3.51632
2.42281	1.85851	0.92907	4.0089	4.00179	3.51961	2.08629	2.49681	2.66262	4.0089	4.00179	3.51961
1.28924	0.802425	0.932595	2.3795	3.68767	3.5208	2.37248	2.73241	2.66676	2.3795	3.68767	3.5208
6.92033	1.28172	0.935392	2.4921	2.87818	3.52083	2.50445	3.62056	2.66714	2.4921	2.87818	3.52083
3.6	0.718392	0.935667	2.83537	3.6345	3.52085	2.36799	3.09277	2.66782	2.83537	3.6345	3.52085
2.54825	1.55084	0.93579	4.30056	3.60917	3.52792	2.20753	2.47467	2.66787	4.30056	3.60917	3.52792
4.25357	3.06933	0.938251	2.81896	4.12781	3.52863	2.60682	2.00299	2.67375	2.81896	4.12781	3.52863
1.43287	0.869404	0.938925	2.80364	3.90777	3.52889	1.88701	2.79825	2.67515	2.80364	3.90777	3.52889
3.41555	0.879765	0.940745	4.02559	4.83683	3.52927	1.97976	2.88217	2.67832	4.02559	4.83683	3.52927
1.48668	0.980025	0.942189	2.93095	3.88882	3.53032	2.66094	2.28217	2.67915	2.93095	3.88882	3.53032
1.6883	0.577867	0.944321	3.82349	4.0746	3.53125	2.13136	2.32799	2.67984	3.82349	4.0746	3.53125
4.35112	2.4326	0.944403	2.44618	3.09896	3.5316	2.08474	3.0548	2.68241	2.44618	3.09896	3.5316
0.790566	2.70238	0.947039	2.15833	3.55326	3.53333	1.90944	2.13677	2.6863	2.15833	3.55326	3.53333
2.44041	0.587356	0.949304	0.31063	4.02845	3.54328	2.7624	2.40673	2.68782	0.31063	4.02845	3.54328
2.06192	0.736471	0.949304	2.94246	3.63413	3.5484	2.49234	2.54804	2.68933	2.94246	3.63413	3.5484
2.92387	2.39892	0.950999	4.9254	3.74486	3.55046	2.22976	2.69161	2.68933	4.9254	3.74486	3.55046
3.70966	1.15137	0.951982	3.55595	3.58418	3.55226	2.30661	2.54625	2.69083	3.55595	3.58418	3.55226
2.21773	1.32411	0.954335	3.27179	4.74328	3.55924	2.94759	2.76444	2.69234	3.27179	4.74328	3.55924
0.751194	0.887948	0.960978	2.25844	3.42162	3.56141	1.59533	1.69414	2.69338	2.25844	3.42162	3.56141
3.20535	1.34441	0.961567	3.1359	3.2785	3.56662	3.65765	2.90394	2.69579	3.1359	3.2785	3.56662
3.31032	0.526196	0.961658	2.0498	3.955	3.56733	2.36092	3.25772	2.70071	2.0498	3.955	3.56733
1.82904	2.53633	0.966411	2.89678	4.06817	3.56755	1.40794	2.35344	2.70169	2.89678	4.06817	3.56755
2.51453	1.58022	0.966624	2.22712	4.39877	3.57372	2.78131	2.25873	2.7022	2.22712	4.39877	3.57372
2.62587	1.48296	0.96825	3.28997	4.27373	3.57913	2.60522	2.76664	2.70324	3.28997	4.27373	3.57913
4.82505	2.56351	0.969278	2.5385	3.44338	3.58069	1.60703	2.61415	2.7036	2.5385	3.44338	3.58069
1.67517	0.484442	0.97043	4.10345	3.04112	3.58643	1.7113	2.63838	2.70468	4.10345	3.04112	3.58643
3.02906	0.0732842	0.971156	2.77552	3.94608	3.58816	2.16724	3.37382	2.70772	2.77552	3.94608	3.58816
1.9492	-0.601311	0.972111	2.5811	3.01869	3.58845	3.11057	3.46512	2.70772	2.5811	3.01869	3.58845
0.151029	1.35819	0.972282	2.99012	4.161	3.59099	0.875711	2.23542	2.70803	2.99012	4.161	3.59099
2.9045	-0.72644	0.973019	3.12125	4.21653	3.59185	1.70582	2.97989	2.70875	3.12125	4.21653	3.59185
1.52529	1.06191	0.975345	2.02191	3.11343	3.59354	2.54763	2.76707	2.71155	2.02191	3.11343	3.59354
2.23971	0.0660652	0.982065	3.41576	4.03597	3.5969	1.98476	2.06108	2.71258	3.41576	4.03597	3.5969
2.40161	0.955939	0.985066	1.91293	2.15809	3.5984	1.81969	3.03344	2.71406	1.91293	2.15809	3.5984
3.98079	1.35023	0.986091	2.78363	3.36074	3.60454	1.51619	2.62423	2.71419	2.78363	3.36074	3.60454
4.00361	1.96581	0.988365	3.84253	3.07121	3.6073	1.70273	3.01303	2.71554	3.84253	3.07121	3.6073
2.9906	1.08423	0.99065	4.21081	4.17918	3.62263	2.43305	1.25321	2.71702	4.21081	4.17918	3.62263
0.763021	2.38327	0.991388	3.43333	4.08478	3.62484	2.55609	3.25584	2.71702	3.43333	4.08478	3.62484
3.35163	1.76197	0.993572	4.67798	4.08232	3.62801	2.88547	3.05269	2.71708	4.67798	4.08232	3.62801
2.78362	1.37839	0.993893	2.30356	3.39011	3.62994	0.904976	2.29048	2.71784	2.30356	3.39011	3.62994
1.04753	0.857933	0.99522	1.52176	3.54638	3.63343	2.72598	2.89509	2.71805	1.52176	3.54638	3.63343
1.7864	1.31812	0.995273	2.87748	3.35281	3.63574	2.72299	2.13129	2.7185	2.87748	3.35281	3.63574
4.50105	0.874496	0.998161	3.66014	3.79665	3.63784	3.09474	3.82556	2.7185	3.66014	3.79665	3.63784
4.10786	-0.095305	1.00015	3.6603	3.89428	3.63915	1.70985	2.70816	2.72146	3.6603	3.89428	3.63915
1.79686	1.89875	1.00741	2.86617	3.36063	3.64017	2.67256	3.07727	2.72231	2.86617	3.36063	3.64017
3.07405	0.67827	1.0084	2.85658	3.82175	3.64505	2.50074	2.7069	2.72273	2.85658	3.82175	3.64505
2.20902	0.721212	1.01109	2.8488	4.16516	3.64553	1.8349	2.56141	2.72355	2.8488	4.16516	3.64553
2.96339	1.81745	1.01171	3.40871	3.82195	3.65302	1.81595	2.40784	2.72627	3.40871	3.82195	3.65302
3.00495	2.13947	1.01226	2.74938	2.84024	3.65324	2.90194	3.04324	2.72627	2.74938	2.84024	3.65324
3.15009	1.38348	1.01231	4.40466	4.68111	3.65557	2.35964	3.22232	2.72774	4.40466	4.68111	3.65557
2.49912	1.15759	1.02027	0.686028	3.84998	3.65815	2.56003	2.39229	2.72921	0.686028	3.84998	3.65815
3.18679	2.14192	1.02061	3.44941	3.87384	3.6591	2.78758	3.18204	2.73298	3.44941	3.87384	3.6591
2.60465	0.15063	1.02223	5.71547	4.99182	3.66519	1.93714	3.75916	2.73589	5.71547	4.99182	3.66519
2.20628	1.24815	1.02702	3.12316	4.02629	3.67255	3.07654	3.07762	2.73782	3.12316	4.02629	3.67255
3.49705	1.81073	1.02702	3.748	3.42706	3.67564	3.1159	3.29945	2.73838	3.748	3.42706	3.67564
2.5334	1.5907	1.02991	3.18651	4.01367	3.67732	2.27191	3.55681	2.74009	3.18651	4.01367	3.67732
0.664162	0.772212	1.0311	4.26085	0.411561	3.67771	3.0014	3.01247	2.74319	4.26085	0.411561	3.67771
1.91984	-0.764866	1.03232	1.23391	3.34164	3.67869	2.86526	3.56012	2.74319	1.23391	3.34164	3.67869
3.17938	0.813812	1.03616	2.31503	3.69233	3.67966	3.07259	2.80837	2.7442	2.31503	3.69233	3.67966
3.53924	3.18548	1.03899	2.77552	3.99413	3.68036	1.99062	2.18977	2.74649	2.77552	3.99413	3.68036
1.04456	0.516028	1.03956	3.64963	3.90861	3.6809	2.45867	3.39003	2.74664	3.64963	3.90861	3.6809
3.44631	1.84813	1.04658	3.75931	2.92293	3.68487	2.99602	2.64652	2.74794	3.75931	2.92293	3.68487
3.39521	4.28284	1.04658	4.04843	3.86372	3.68663	2.4263	2.81181	2.75041	4.04843	3.86372	3.68663
3.05726	1.67978	1.04743	4.30437	3.22955	3.69096	2.25761	3.29634	2.75165	4.30437	3.22955	3.69096
2.23165	1.02126	1.04793	3.12044	3.67005	3.69182	2.29584	1.79788	2.75372	3.12044	3.67005	3.69182
1.99282	-0.557324	1.05476	4.15588	4.05756	3.69242	2.71894	2.04887	2.75372	4.15588	4.05756	3.69242
2.64428	1.70313	1.05502	2.89081	3.88247	3.69607	2.85111	2.86935	2.75472	2.89081	3.88247	3.69607
1.78508	1.90388	1.05521	2.89971	3.33244	3.6978	1.2447	1.91778	2.75617	2.89971	3.33244	3.6978
3.89294	1.0395	1.05611	3.36334	5.4804	3.70065	2.84971	2.66101	2.75804	3.36334	5.4804	3.70065
2.70002	0.241286	1.05799	2.43362	3.83958	3.70286	2.5979	2.85891	2.75837	2.43362	3.83958	3.70286
2.59757	2.39833	1.05886	3.30773	3.3918	3.71124	2.81689	2.75761	2.76273	3.30773	3.3918	3.71124
4.60241	2.88037	1.05988	3.0469	4.16324	3.71944	2.45072	3.53223	2.76273	3.0469	4.16324	3.71944
2.47877	1.99131	1.06079	3.85912	3.22283	3.72704	3.221	2.63436	2.76317	3.85912	3.22283	3.72704
2.04104	0.986294	1.06284	3.16651	4.12317	3.72898	2.7624	2.77451	2.76417	3.16651	4.12317	3.72898
2.89347	2.25104	1.06298	3.57119	3.9833	3.72936	2.24037	3.63407	2.76417	3.57119	3.9833	3.72936
4.43553	1.35728	1.0638	4.21164	4.15479	3.74048	2.2312	2.36431	2.76554	4.21164	4.15479	3.74048
0.507604	0.791874	1.06597	2.5029	3.5329	3.74202	2.56338	2.94714	2.7656	2.5029	3.5329	3.74202
3.57337	1.3193	1.06597	1.50884	3.61291	3.74374	2.3795	3.29153	2.76604	1.50884	3.61291	3.74374
6.40009	1.49548	1.06797	4.21296	4.13885	3.74752	3.63797	3.20912	2.76703	4.21296	4.13885	3.74752
3.04365	0.822672	1.06827	4.03083	3.37373	3.74784	3.26918	2.70417	2.76719	4.03083	3.37373	3.74784
2.94087	1.99163	1.06969	3.25488	3.71796	3.74875	2.92523	2.81924	2.76846	3.25488	3.71796	3.74875
0.79745	0.740109	1.07024	2.85887	4.00886	3.75055	2.5516	2.42213	2.77498	2.85887	4.00886	3.75055
1.21489	-0.516707	1.07031	3.23153	3.72396	3.75228	1.7697	1.00617	2.77554	3.23153	3.72396	3.75228
4.32071	1.8358	1.07031	2.02263	4.1216	3.75465	2.03085	2.3739	2.77554	2.02263	4.1216	3.75465
2.18433	0.530427	1.07157	1.59865	4.6311	3.75494	2.44952	2.18024	2.77596	1.59865	4.6311	3.75494
3.01033	1.87993	1.07318	2.35787	2.71758	3.75523	2.77795	3.18533	2.77596	2.35787	2.71758	3.75523
2.47509	1.80283	1.07627	3.13064	3.4379	3.76091	2.96466	2.94308	2.77738	3.13064	3.4379	3.76091
4.12239	2.42186	1.07633	3.04956	3.51243	3.76294	2.89429	2.87507	2.77866	3.04956	3.51243	3.76294
1.841	0.457633	1.07925	3.02391	3.36014	3.76414	2.43305	2.18713	2.78022	3.02391	3.36014	3.76414
1.79502	1.43325	1.07985	3.71163	4.07648	3.76439	2.65901	2.58486	2.78022	3.71163	4.07648	3.76439
0.381586	-0.951295	1.08476	2.81806	2.68865	3.76957	2.30394	3.00432	2.78022	2.81806	2.68865	3.76957
2.4476	1.92598	1.08585	2.69558	4.02978	3.77293	1.89076	2.73422	2.78164	2.69558	4.02978	3.77293
4.55917	2.13423	1.0884	2.92027	3.41485	3.77506	2.17163	2.24438	2.78305	2.92027	3.41485	3.77506
2.15729	1.40663	1.09169	2.75608	3.68122	3.78179	3.27383	2.48779	2.78386	2.75608	3.68122	3.78179
3.86251	0.75491	1.09183	3.51504	4.59113	3.78226	2.77987	3.36775	2.78386	3.51504	4.59113	3.78226
3.33656	1.6433	1.0932	0.99175	3.78935	3.78371	2.9037	3.33718	2.78484	0.99175	3.78935	3.78371
1.74387	1.76104	1.09526	1.35134	3.18609	3.78854	2.4367	3.23712	2.78527	1.35134	3.18609	3.78854
3.76212	2.22935	1.10059	2.64737	3.87275	3.79723	1.89971	2.51287	2.78625	2.64737	3.87275	3.79723
3.2654	0.715449	1.10145	4.98422	3.98166	3.79849	2.55609	2.24093	2.78669	4.98422	3.98166	3.79849
0.0220252	2.29792	1.10145	3.13152	3.86358	3.80551	2.36994	2.49339	2.78669	3.13152	3.86358	3.80551
3.60198	1.92072	1.1029	1.69964	2.34661	3.80942	1.97976	2.97932	2.79091	1.69964	2.34661	3.80942
1.70985	-0.127643	1.1039	2.28844	3.84183	3.81017	2.03072	2.69077	2.79188	2.28844	3.84183	3.81017
1.05709	1.05608	1.1039	3.41713	4.00252	3.81165	2.01382	2.32202	2.79232	3.41713	4.00252	3.81165
4.12437	0.313622	1.10448	3.07153	3.2917	3.81264	3.15534	3.75916	2.79235	3.07153	3.2917	3.81264
1.68702	2.53196	1.10506	3.41235	4.19516	3.81783	3.39806	3.40882	2.79275	3.41235	4.19516	3.81783
3.3353	2.07795	1.10598	3.07704	3.84479	3.82541	2.36977	2.83682	2.79384	3.07704	3.84479	3.82541
3.33374	2.37888	1.10702	3.29748	3.77192	3.82885	2.25221	3.03762	2.79609	3.29748	3.77192	3.82885
3.80118	1.94457	1.10898	4.39071	2.9233	3.82971	3.60328	3.18518	2.7983	4.39071	2.9233	3.82971
3.05361	1.86667	1.10938	4.40584	4.53629	3.8328	2.02604	2.86956	2.7997	4.40584	4.53629	3.8328
3.20213	1.60683	1.10942	3.39146	3.73723	3.84115	2.0193	2.54905	2.79985	3.39146	3.73723	3.84115
0.449153	1.03474	1.10964	4.58387	4.00245	3.84354	2.44526	2.63405	2.80109	4.58387	4.00245	3.84354
1.19504	2.44528	1.11433	2.2911	3.69265	3.84561	2.13515	2.91404	2.80249	2.2911	3.69265	3.84561
3.77524	2.91229	1.11723	4.2209	4.44611	3.85006	2.8164	3.02023	2.80485	4.2209	4.44611	3.85006
2.55733	0.87595	1.11774	3.16171	3.95612	3.85275	1.94684	2.8836	2.80805	3.16171	3.95612	3.85275
4.08302	2.53377	1.11903	3.84368	3.98516	3.85476	2.07769	2.96276	2.80843	3.84368	3.98516	3.85476
5.32131	1.32164	1.12031	3.90811	3.68456	3.85688	2.49529	3.29488	2.80843	3.90811	3.68456	3.85688
1.07613	1.37455	1.1219	1.92239	4.65195	3.85714	3.16562	2.25027	2.81036	1.92239	4.65195	3.85714
3.84176	0.826914	1.12281	3.70134	3.80775	3.85773	0.934786	1.99999	2.81078	3.70134	3.80775	3.85773
3.57587	2.72164	1.12617	2.49	3.54445	3.86562	2.43183	2.60143	2.81121	2.49	3.54445	3.86562
2.82135	2.75824	1.12827	2.86117	3.90948	3.86783	1.72094	3.09014	2.81121	2.86117	3.90948	3.86783
2.58385	1.10127	1.13084	4.81951	4.08431	3.86944	2.5555	2.96084	2.81355	4.81951	4.08431	3.86944
3.31889	2.00265	1.13147	2.8416	3.7362	3.8703	2.569	2.86281	2.81398	2.8416	3.7362	3.8703
3.02385	1.73109	1.132	2.29584	3.82703	3.87598	3.15085	2.94219	2.81404	2.29584	3.82703	3.87598
1.80835	-0.216797	1.13337	3.95046	3.70706	3.87717	1.8101	2.94299	2.81858	3.95046	3.70706	3.87717
2.88639	2.60314	1.13351	3.99726	3.714	3.87747	1.76696	2.35941	2.82261	3.99726	3.714	3.87747
2.31949	0.655295	1.13391	2.85063	4.53373	3.87947	2.67674	2.78797	2.82263	2.85063	4.53373	3.87947
0.327527	-0.118291	1.13504	2.18519	3.83009	3.88437	2.75456	3.01027	2.82263	2.18519	3.83009	3.88437
1.95546	0.9742	1.1368	3.03845	4.08987	3.8871	2.54704	3.35409	2.824	3.03845	4.08987	3.8871
2.16643	0.894055	1.13856	3.81923	3.71524	3.89364	2.94719	3.629	2.82442	3.81923	3.71524	3.89364
1.82156	1.66384	1.14086	5.21763	5.01731	3.89625	3.24805	2.7556	2.82812	5.21763	5.01731	3.89625
2.41197	0.626667	1.14139	2.16206	3.99008	3.89645	2.18659	2.99396	2.82925	2.16206	3.99008	3.89645
2.24393	2.22071	1.14215	2.85397	2.8311	3.89749	2.61006	2.72455	2.83027	2.85397	2.8311	3.89749
2.77512	-0.31835	1.14234	2.22976	3.92843	3.89831	2.61227	2.91858	2.83301	2.22976	3.92843	3.89831
2.25047	2.79364	1.14234	2.43369	2.91978	3.89836	2.45144	3.12932	2.83614	2.43369	2.91978	3.89836
2.63525	0.488971	1.14318	3.98162	3.7362	3.89857	3.95096	3.1133	2.83733	3.98162	3.7362	3.89857
2.7149	2.98305	1.14573	3.36546	3.27142	3.90012	3.67559	4.23329	2.83887	3.36546	3.27142	3.90012
3.65155	1.03314	1.14829	2.80885	4.2473	3.90572	1.71694	2.6624	2.8417	2.80885	4.2473	3.90572
2.62491	0.490472	1.15158	4.62718	4.36368	3.90661	2.76388	3.23077	2.8429	4.62718	4.36368	3.90661
2.18764	0.695864	1.15656	2.90148	3.92234	3.91332	2.90194	3.44837	2.8429	2.90148	3.92234	3.91332
3.52531	2.9581	1.15656	3.88191	3.76199	3.91709	2.76531	2.92196	2.84426	3.88191	3.76199	3.91709
0.918202	1.67668	1.15676	4.2281	3.9396	3.92134	1.83095	2.94113	2.84467	4.2281	3.9396	3.92134
0.808052	0.958629	1.15855	3.1696	3.86884	3.92831	2.92176	3.06592	2.84519	3.1696	3.86884	3.92831
2.51188	0.982459	1.1586	4.67864	3.80994	3.92856	3.15464	3.37093	2.84519	4.67864	3.80994	3.92856
4.52566	2.1215	1.15988	3.25452	4.53275	3.92952	3.37218	3.11834	2.84537	3.25452	4.53275	3.92952
2.372	1.8403	1.1627	2.92701	4.26907	3.92972	2.1539	3.32157	2.84696	2.92701	4.26907	3.92972
1.2924	2.07111	1.16811	3.67757	4.28217	3.93401	3.48793	3.62404	2.8479	3.67757	4.28217	3.93401
1.26745	1.33104	1.16963	5.52669	4.0378	3.93538	2.35799	3.24396	2.84808	5.52669	4.0378	3.93538
1.75396	0.950974	1.17103	5.07789	4.02651	3.93892	2.62148	3.31208	2.84869	5.07789	4.02651	3.93892
3.53027	1.40101	1.17142	3.29308	3.79416	3.94283	3.35427	3.3419	2.84884	3.29308	3.79416	3.94283
4.43016	0.421462	1.17185	4.26808	4.0939	3.9433	1.73393	2.30248	2.8506	4.26808	4.0939	3.9433
2.81619	1.97516	1.17349	3.15425	4.01523	3.95032	2.18046	2.45111	2.85179	3.15425	4.01523	3.95032
1.81122	1.94676	1.17391	4.16916	3.22774	3.95252	2.23963	2.6662	2.8533	4.16916	3.22774	3.95252
1.27964	2.60224	1.17483	3.3988	3.53238	3.95312	1.14978	2.07238	2.85348	3.3988	3.53238	3.95312
2.28565	0.699338	1.17518	2.34858	4.14487	3.95356	2.08629	2.14924	2.855	2.34858	4.14487	3.95356
3.10917	1.55936	1.17573	3.32726	4.22466	3.95596	2.79267	3.00246	2.85542	3.32726	4.22466	3.95596
2.79245	-0.444	1.17641	3.78055	3.52828	3.95788	3.35848	3.37611	2.85727	3.78055	3.52828	3.95788
3.62662	1.01973	1.17736	3.41794	3.86403	3.95857	1.9191	2.56683	2.8581	3.41794	3.86403	3.95857
3.43158	1.62792	1.17877	3.42658	4.30526	3.95893	3.72718	2.80797	2.86257	3.42658	4.30526	3.95893
2.89188	1.66772	1.18027	5.14629	4.27647	3.96011	3.22753	3.04737	2.86294	5.14629	4.27647	3.96011
0.678031	0.655159	1.18066	3.69135	3.67311	3.96187	2.72698	3.19532	2.86346	3.69135	3.67311	3.96187
1.22935	-0.130914	1.18128	2.5034	3.97473	3.96349	2.99163	3.28438	2.86512	2.5034	3.97473	3.96349
2.58077	1.53976	1.18227	2.99788	3.81016	3.96479	3.24106	3.22887	2.86649	2.99788	3.81016	3.96479
3.31652	2.3651	1.18232	3.28588	4.41898	3.97394	2.07218	3.49483	2.86649	3.28588	4.41898	3.97394
3.39225	1.83291	1.18263	4.55116	3.73337	3.97547	2.45778	1.96949	2.86791	4.55116	3.73337	3.97547
3.14638	3.08806	1.18367	3.73957	3.57315	3.97586	3.40809	3.23061	2.86916	3.73957	3.57315	3.97586
2.96907	2.01011	1.18399	5.25416	3.67167	3.97713	2.15962	2.37782	2.86931	5.25416	3.67167	3.97713
1.89647	1.89223	1.18539	2.92464	4.51443	3.97866	3.11588	2.90226	2.87055	2.92464	4.51443	3.97866
1.65712	1.1552	1.18706	2.37681	3.1102	3.97958	2.66317	3.54126	2.87182	2.37681	3.1102	3.97958
5.14151	1.38378	1.19156	2.98548	3.47532	3.98641	2.50174	3.27032	2.87315	2.98548	3.47532	3.98641
4.24945	3.35212	1.19497	5.67153	4.72293	3.98698	1.23483	2.86939	2.87575	5.67153	4.72293	3.98698
2.31254	2.58314	1.19625	2.36452	4.67161	3.99172	3.10171	3.2175	2.87616	2.36452	4.67161	3.99172
1.09647	1.43157	1.19677	3.35737	3.85486	3.99428	2.31001	2.46371	2.87668	3.35737	3.85486	3.99428
1.53875	2.42861	1.19839	2.49296	4.2874	3.99935	3.62495	3.70336	2.88185	2.49296	4.2874	3.99935
2.95855	1.9005	1.20203	2.81957	3.65075	4.00297	2.48882	3.05894	2.88277	2.81957	3.65075	4.00297
3.74287	1.90469	1.20249	2.63364	3.89431	4.00665	2.29986	3.19322	2.88409	2.63364	3.89431	4.00665
2.53299	1.93632	1.20249	5.08823	4.08628	4.00962	2.22976	3.48805	2.88449	5.08823	4.08628	4.00962
1.67679	1.6545	1.20276	3.29043	4.11173	4.01003	3.07123	2.3204	2.88566	3.29043	4.11173	4.01003
2.318	1.74872	1.2046	4.35034	4.00284	4.01049	2.90659	2.98674	2.88566	4.35034	4.00284	4.01049
2.8131	1.69324	1.20492	3.11587	4.2835	4.02284	2.37076	3.11276	2.8876	3.11587	4.2835	4.02284
2.70423	0.456597	1.20655	3.99769	3.67945	4.02495	2.66946	1.95911	2.88879	3.99769	3.67945	4.02495
1.03448	0.73259	1.20705	3.71213	4.35531	4.02642	2.36416	3.33747	2.88879	3.71213	4.35531	4.02642
4.50486	1.59979	1.21104	3.77461	3.06144	4.0265	2.8757	3.44194	2.88879	3.77461	3.06144	4.0265
1.44937	0.00426264	1.2132	4.32931	3.08053	4.04634	3.08003	3.46983	2.88895	4.32931	3.08053	4.04634
1.82812	-0.330524	1.21334	2.3166	3.90549	4.04703	3.07024	3.56959	2.89011	2.3166	3.90549	4.04703
4.09559	3.52446	1.21408	4.71401	4.26652	4.04834	2.48703	3.31801	2.89051	4.71401	4.26652	4.04834
2.72257	-0.282767	1.21486	3.97937	4.41037	4.05031	2.76045	2.41292	2.89102	3.97937	4.41037	4.05031
3.54277	3.20019	1.21518	3.02709	4.12506	4.05056	3.09023	3.08391	2.89119	3.02709	4.12506	4.05056
3.25546	1.71884	1.2174	3.56034	4.40843	4.05076	2.48765	3.49326	2.89142	3.56034	4.40843	4.05076
2.85962	1.88789	1.21761	3.10518	3.63043	4.05131	3.74159	3.12515	2.89233	3.10518	3.63043	4.05131
2.36697	1.01873	1.21794	3.33467	3.99974	4.05669	2.43798	2.94482	2.89404	3.33467	3.99974	4.05669
1.56254	1.32692	1.2191	2.84784	3.978	4.05732	3.0477	3.04162	2.89404	2.84784	3.978	4.05732
1.64252	0.709146	1.21913	1.20865	5.14058	4.05901	1.73299	2.16167	2.89585	1.20865	5.14058	4.05901
3.45035	3.37158	1.21941	4.48008	3.74084	4.06893	2.50406	3.17794	2.89831	4.48008	3.74084	4.06893
4.24259	1.04013	1.22057	2.59263	4.17147	4.0725	3.27555	3.29929	2.90092	2.59263	4.17147	4.0725
4.85393	1.60946	1.22244	5.283	4.35794	4.081	2.75753	3.41136	2.90092	5.283	4.35794	4.081
2.22801	0.857007	1.22268	4.08378	4.77418	4.08106	2.66531	3.38773	2.90312	4.08378	4.77418	4.08106
2.36964	0.807109	1.22315	3.81811	4.00802	4.08346	3.16574	3.30253	2.90462	3.81811	4.00802	4.08346
2.21359	1.5301	1.22419	2.94223	4.07009	4.08531	2.9479	2.33788	2.90502	2.94223	4.07009	4.08531
3.5098	0.92581	1.22492	4.34035	4.23598	4.08675	3.25103	3.17478	2.90606	4.34035	4.23598	4.08675
2.29782	1.20021	1.22587	3.48969	4.619	4.093	3.04047	3.37583	2.90612	3.48969	4.619	4.093
3.164	3.14664	1.2269	3.52074	4.49051	4.09316	1.90148	2.18648	2.90702	3.52074	4.49051	4.09316
3.56186	2.03215	1.22715	3.29919	4.02721	4.09339	2.72698	2.35013	2.90702	3.29919	4.02721	4.09339
3.26224	2.97949	1.22715	4.59644	4.26252	4.09471	2.35651	3.64299	2.9097	4.59644	4.26252	4.09471
0.883851	0.176458	1.22743	2.28635	4.01866	4.09622	2.49708	3.00672	2.91076	2.28635	4.01866	4.09622
1.27678	1.60494	1.22979	2.42131	4.4358	4.09729	2.9407	2.85663	2.91126	2.42131	4.4358	4.09729
1.21563	1.44477	1.23086	4.1911	4.72922	4.10301	3.2711	3.8102	2.91165	4.1911	4.72922	4.10301
1.68902	1.42755	1.23256	3.81463	3.98653	4.10371	2.74268	3.55893	2.91181	3.81463	3.98653	4.10371
2.67144	2.19263	1.23342	4.70609	4.66972	4.11068	3.03895	3.11974	2.91294	4.70609	4.66972	4.11068
3.05695	0.858335	1.23479	3.83764	4.4359	4.12154	2.59865	3.27372	2.91513	3.83764	4.4359	4.12154
3.43458	0.915013	1.24196	3.77979	3.5634	4.12619	3.00183	3.46105	2.91553	3.77979	3.5634	4.12619
0.376812	0.768679	1.24314	2.23778	3.61822	4.1324	3.06525	2.31776	2.91623	2.23778	3.61822	4.1324
1.3636	2.12096	1.24607	3.24348	3.81953	4.14209	2.76092	3.26752	2.91756	3.24348	3.81953	4.14209
2.13	2.78826	1.24743	3.32705	2.35754	4.14238	3.1391	3.02079	2.91834	3.32705	2.35754	4.14238
3.42435	2.0238	1.24779	4.29677	3.74066	4.14347	2.55913	2.47352	2.91939	4.29677	3.74066	4.14347
1.42875	2.099	1.25086	2.77213	4.12317	4.14465	3.07535	3.20248	2.92013	2.77213	4.12317	4.14465
2.58392	2.06016	1.25089	3.90812	4.25334	4.14594	2.61047	3.34435	2.92048	3.90812	4.25334	4.14594
3.38065	1.54548	1.25172	2.72751	4.48351	4.14713	2.89347	3.57487	2.92231	2.72751	4.48351	4.14713
3.82319	1.41913	1.25325	4.0335	3.95156	4.14729	1.61493	2.62658	2.92487	4.0335	3.95156	4.14729
3.22283	2.29775	1.25406	3.18506	4.42255	4.1533	2.14043	2.72972	2.92487	3.18506	4.42255	4.1533
2.36383	1.4078	1.25466	3.87181	4.78617	4.15459	2.38522	3.17398	2.92487	3.87181	4.78617	4.15459
0.947209	1.97349	1.25538	3.40951	4.2911	4.15968	1.92773	2.83657	2.92493	3.40951	4.2911	4.15968
3.95383	0.260698	1.2558	2.96342	4.37331	4.15999	2.86255	2.74586	2.92615	2.96342	4.37331	4.15999
5.57339	0.132091	1.25631	3.12662	3.73209	4.16363	2.76969	3.12515	2.92999	3.12662	3.73209	4.16363
2.59871	0.635322	1.26065	4.47726	5.20104	4.16383	2.8111	2.98563	2.93019	4.47726	5.20104	4.16383
3.87011	0.447184	1.26138	3.22702	4.55697	4.16454	3.11973	3.00486	2.93111	3.22702	4.55697	4.16454
2.54066	1.44718	1.26138	4.61132	3.95517	4.1654	2.00477	3.10565	2.93415	4.61132	3.95517	4.1654
1.016	2.03215	1.26138	2.79251	4.42672	4.16671	2.38735	3.52767	2.93641	2.79251	4.42672	4.16671
2.16121	0.893053	1.26152	6.17602	5.04492	4.17103	2.60573	3.22278	2.9367	6.17602	5.04492	4.17103
3.20079	2.02433	1.26175	3.45849	4.23782	4.17258	2.99393	2.97895	2.93797	3.45849	4.23782	4.17258
3.62225	1.11704	1.26212	4.85926	4.49013	4.17492	3.01286	2.82392	2.93897	4.85926	4.49013	4.17492
3.9597	0.427983	1.2677	4.26552	4.53933	4.18237	3.01793	2.71453	2.93952	4.26552	4.53933	4.18237
0.875693	0.656626	1.26878	3.79863	4.4132	4.18322	2.42874	3.19759	2.94051	3.79863	4.4132	4.18322
2.34573	2.35031	1.27561	3.1167	4.48132	4.18393	3.14906	3.59202	2.94077	3.1167	4.48132	4.18393
2.02303	0.438527	1.27699	4.04302	4.31911	4.19076	3.1412	2.8925	2.94203	4.04302	4.31911	4.19076
2.61258	2.36811	1.27929	3.39743	4.31303	4.19138	0.513386	2.86573	2.94336	3.39743	4.31303	4.19138
2.41202	1.66476	1.28112	4.22164	4.27472	4.19504	2.50406	3.10099	2.94415	4.22164	4.27472	4.19504
1.65474	0.200576	1.28131	4.88325	4.31497	4.19571	2.91078	3.29291	2.95095	4.88325	4.31497	4.19571
2.93751	2.39024	1.28426	3.97981	4.70702	4.19904	2.66005	2.30217	2.95506	3.97981	4.70702	4.19904
3.01607	1.94752	1.28512	3.19631	4.19181	4.19943	0.706777	2.54804	2.95544	3.19631	4.19181	4.19943
4.32908	3.60647	1.28563	3.04577	4.01028	4.20552	1.60227	2.75506	2.95563	3.04577	4.01028	4.20552
2.44862	1.48425	1.2869	2.86593	4.43126	4.20739	2.4988	3.13571	2.9567	2.86593	4.43126	4.20739
1.94557	1.75692	1.2882	3.16116	4.6736	4.20829	1.8244	2.79661	2.95882	3.16116	4.6736	4.20829
2.89325	2.49715	1.28972	2.34959	3.08505	4.20922	2.07374	3.56025	2.95882	2.34959	3.08505	4.20922
2.36304	2.39604	1.2907	3.46212	3.82397	4.2158	2.37376	2.33421	2.96007	3.46212	3.82397	4.2158
2.93074	1.70866	1.29093	3.87928	4.01046	4.22155	0.469792	2.15562	2.96079	3.87928	4.01046	4.22155
3.7323	2.43866	1.29269	4.30502	4.8767	4.23542	2.85154	3.2571	2.96132	4.30502	4.8767	4.23542
3.33766	1.74844	1.29408	2.42502	3.72649	4.23847	3.27215	3.39058	2.96242	2.42502	3.72649	4.23847
3.12296	1.76737	1.29772	2.70832	4.40876	4.23929	2.61607	3.38602	2.96328	2.70832	4.40876	4.23929
4.17276	0.810752	1.3	3.3593	4.58591	4.24325	1.90965	1.21607	2.9667	3.3593	4.58591	4.24325
4.45536	0.403628	1.30406	4.72464	4.3808	4.24411	3.03684	3.4514	2.96702	4.72464	4.3808	4.24411
0.698843	1.0083	1.30456	4.03969	4.67252	4.24627	3.27419	2.55365	2.96789	4.03969	4.67252	4.24627
2.67907	2.02015	1.30481	4.13067	4.77751	4.2603	2.73846	2.8842	2.96913	4.13067	4.77751	4.2603
1.86487	1.23703	1.3057	3.42596	4.45894	4.26145	3.66607	3.20943	2.97108	3.42596	4.45894	4.26145
3.07469	2.06135	1.30779	4.52931	3.92922	4.26873	3.77578	3.19695	2.97232	4.52931	3.92922	4.26873
3.17201	2.2272	1.30883	2.50744	4.53775	4.27403	1.95389	3.08108	2.97316	2.50744	4.53775	4.27403
2.01083	0.726405	1.3103	3.13875	4.49969	4.27856	0.614586	1.83635	2.97705	3.13875	4.49969	4.27856
2.35639	-2.06368	1.31114	1.84646	4.53549	4.27913	3.61553	2.97307	2.97975	1.84646	4.53549	4.27913
2.41263	0.774173	1.31383	4.11973	4.40382	4.27964	2.8297	3.28371	2.97997	4.11973	4.40382	4.27964
3.0822	2.5339	1.31386	4.92656	4.01226	4.28086	2.49846	2.85227	2.98037	4.92656	4.01226	4.28086
1.12301	1.25977	1.3148	2.8681	3.50298	4.29125	2.67	3.68916	2.9806	2.8681	3.50298	4.29125
3.38445	2.83415	1.31788	3.56776	4.42325	4.29182	1.86279	2.1486	2.9837	3.56776	4.42325	4.29182
-0.119936	1.61929	1.31896	3.14487	4.7237	4.29823	2.64848	2.93432	2.98377	3.14487	4.7237	4.29823
2.05762	1.0428	1.31913	3.32113	4.43737	4.29868	2.75553	3.39527	2.985	3.32113	4.43737	4.29868
2.75891	1.46867	1.31931	3.41256	4.77573	4.30345	2.75753	3.28482	2.98538	3.41256	4.77573	4.30345
-0.0803189	0.974833	1.32006	2.53801	4.50919	4.30356	3.50204	3.27541	2.98868	2.53801	4.50919	4.30356
3.64935	0.89825	1.32166	4.87171	4.97911	4.30774	2.76872	2.84544	2.98976	4.87171	4.97911	4.30774
1.48523	-2.61171	1.32555	3.70601	4.6695	4.30846	3.64406	3.65211	2.99061	3.70601	4.6695	4.30846
2.7005	1.80896	1.32669	3.72399	4.00987	4.30867	3.54568	3.02661	2.99244	3.72399	4.00987	4.30867
1.9093	0.880027	1.32677	2.78183	4.47968	4.30984	3.31161	3.74618	2.99358	2.78183	4.47968	4.30984
2.61401	0.896274	1.32754	4.39679	4.24659	4.31272	2.56115	2.33718	2.9955	4.39679	4.24659	4.31272
2.25258	3.05946	1.32776	4.12942	4.39232	4.31748	1.6279	2.54804	2.99757	4.12942	4.39232	4.31748
2.39798	1.92745	1.32958	3.33129	4.37759	4.32357	3.04451	2.58584	2.99794	3.33129	4.37759	4.32357
3.90703	2.50062	1.32981	3.5185	4.29069	4.33518	3.00226	2.71045	2.99794	3.5185	4.29069	4.33518
6.36605	2.22021	1.33506	1.69074	4.03276	4.3353	3.21699	3.4525	3.00011	1.69074	4.03276	4.3353
7.43696	1.29317	1.33739	3.08319	4.72657	4.33759	2.94759	3.63538	3.00038	3.08319	4.72657	4.33759
2.24937	1.56466	1.34142	2.96181	3.98346	4.34281	2.29718	3.15026	3.00159	2.96181	3.98346	4.34281
2.78187	1.61099	1.34152	3.06731	4.31855	4.34669	3.29584	3.17974	3.00159	3.06731	4.31855	4.34669
3.85715	0.695183	1.34176	4.16625	4.77407	4.34886	2.29584	3.1484	3.00243	4.16625	4.77407	4.34886
2.31103	1.76302	1.34597	3.48319	4.21933	4.35212	2.56842	3.0123	3.0035	3.48319	4.21933	4.35212
1.67468	0.809527	1.34618	4.2275	4.54822	4.35468	3.54306	3.24942	3.00677	4.2275	4.54822	4.35468
3.22252	1.31043	1.34815	5.02914	3.57823	4.36051	3.69749	3.27387	3.00677	5.02914	3.57823	4.36051
0.740753	0.788986	1.34899	3.07181	4.49164	4.3608	3.68285	3.66712	3.00798	3.07181	4.49164	4.3608
2.40669	-0.00401619	1.34945	5.58762	4.94495	4.36362	2.66413	2.61759	3.00821	5.58762	4.94495	4.36362
2.84918	0.853059	1.35036	3.42946	4.24273	4.36783	2.56003	2.11621	3.01003	3.42946	4.24273	4.36783
1.04468	1.61097	1.35075	3.83592	4.68094	4.36841	3.04531	3.22055	3.01003	3.83592	4.68094	4.36841
1.83668	1.58269	1.35105	4.33832	4.65818	4.37255	2.96342	2.79703	3.0116	4.33832	4.65818	4.37255
3.07768	2.53953	1.35134	4.50145	4.27613	4.37377	1.49708	2.99721	3.01471	4.50145	4.27613	4.37377
4.43525	1.56048	1.35312	3.30794	4.5748	4.37605	2.79837	3.34573	3.01539	3.30794	4.5748	4.37605
2.02901	1.71193	1.35371	2.51631	4.5926	4.37966	3.34187	3.1883	3.01554	2.51631	4.5926	4.37966
-0.705956	1.77481	1.35407	5.17629	5.26611	4.38239	2.64851	3.208	3.0162	5.17629	5.26611	4.38239
3.02029	1.8767	1.35845	3.11506	4.41568	4.38397	3.01382	2.76026	3.01795	3.11506	4.41568	4.38397
1.1381	1.70002	1.35935	5.15123	5.05754	4.38991	2.77745	3.58486	3.01795	5.15123	5.05754	4.38991
2.7005	2.65871	1.36092	5.00412	4.66394	4.39356	1.09401	3.78867	3.01856	5.00412	4.66394	4.39356
1.41685	1.44251	1.3728	4.63889	4.04856	4.39457	2.40468	2.96912	3.01897	4.63889	4.04856	4.39457
2.68156	0.728145	1.37354	3.58141	4.67918	4.39617	2.3019	2.82155	3.01915	3.58141	4.67918	4.39617
3.41237	0.294778	1.37589	5.3849	4.38299	4.39822	3.35197	3.3187	3.02223	5.3849	4.38299	4.39822
2.378	1.59425	1.3761	2.00236	4.30705	4.40593	3.27137	3.44669	3.0226	2.00236	4.30705	4.40593
4.02466	1.66384	1.37832	3.78533	4.85471	4.40805	3.55638	2.8634	3.02343	3.78533	4.85471	4.40805
3.69538	2.41188	1.37987	3.50711	3.65278	4.40895	3.01937	3.23282	3.02665	3.50711	3.65278	4.40895
2.80885	0.819239	1.38206	4.07171	4.48827	4.41203	2.3167	1.98408	3.02759	4.07171	4.48827	4.41203
2.91988	2.18831	1.38575	3.66978	3.67354	4.41531	2.65384	2.64768	3.02905	3.66978	3.67354	4.41531
2.19481	0.861937	1.3862	4.30331	4.28713	4.42346	1.83089	2.79164	3.03098	4.30331	4.28713	4.42346
3.69799	0.677031	1.38891	3.62065	4.00635	4.42574	1.18143	3.09593	3.03178	3.62065	4.00635	4.42574
3.20627	1.86422	1.38937	4.3493	4.49675	4.42644	2.89479	2.98998	3.03265	4.3493	4.49675	4.42644
1.85212	2.31423	1.39536	2.54591	4.22709	4.43102	3.00473	3.34233	3.0338	2.54591	4.22709	4.43102
3.42099	2.37753	1.40009	2.8591	4.17211	4.43106	2.50715	2.5867	3.03432	2.8591	4.17211	4.43106
3.60218	2.09755	1.4001	4.12895	4.65139	4.43377	3.47106	2.82489	3.03524	4.12895	4.65139	4.43377
1.56065	0.510557	1.4003	4.67378	4.2053	4.43378	2.56003	3.17131	3.0353	4.67378	4.2053	4.43378
2.01826	1.5223	1.40182	3.83617	4.33197	4.43747	3.03159	3.16551	3.03567	3.83617	4.33197	4.43747
1.84628	1.17638	1.40541	3.64672	4.60107	4.44141	2.44517	2.91195	3.03766	3.64672	4.60107	4.44141
2.55869	2.48294	1.40598	4.06693	4.07	4.44536	2.95479	2.74248	3.03769	4.06693	4.07	4.44536
2.82407	1.56181	1.4078	3.19538	3.93006	4.44639	3.68953	3.59748	3.03804	3.19538	3.93006	4.44639
1.23461	2.14873	1.40871	4.10704	3.56489	4.4498	2.2291	3.17809	3.03854	4.10704	3.56489	4.4498
3.00326	1.48921	1.41074	3.66005	4.71226	4.45044	2.86736	3.08467	3.03891	3.66005	4.71226	4.45044
1.58075	1.56274	1.41125	3.53289	4.93255	4.45337	2.79059	3.08041	3.04013	3.53289	4.93255	4.45337
3.44202	1.3052	1.41351	3.3768	4.96406	4.45348	3.11782	2.95488	3.04241	3.3768	4.96406	4.45348
2.2189	1.68289	1.4179	3.36446	4.55986	4.46102	1.79891	2.09365	3.04273	3.36446	4.55986	4.46102
3.62647	2.59024	1.4185	3.25801	3.58278	4.46228	2.47753	3.48192	3.04463	3.25801	3.58278	4.46228
3.20833	1.0631	1.41879	2.5959	4.553	4.47018	2.54306	2.98727	3.04545	2.5959	4.553	4.47018
2.39606	0.742232	1.41897	4.11833	4.47005	4.47323	2.32682	2.56512	3.04672	4.11833	4.47005	4.47323
6.58568	0.609064	1.4199	4.03199	4.61101	4.47642	3.12809	3.20362	3.0478	4.03199	4.61101	4.47642
3.26414	1.2832	1.42084	3.32245	4.5861	4.47786	3.53593	3.61504	3.04862	3.32245	4.5861	4.47786
3.6547	2.04649	1.42255	5.07303	4.31368	4.48532	3.61091	3.63383	3.04862	5.07303	4.31368	4.48532
2.51409	1.21941	1.42308	4.30927	4.06043	4.48654	3.20498	3.24753	3.04934	4.30927	4.06043	4.48654
2.80766	0.716596	1.42834	3.23897	4.95714	4.48879	3.58424	3.40212	3.04975	3.23897	4.95714	4.48879
2.78659	2.30394	1.43092	3.99346	4.02941	4.49821	2.73299	3.15969	3.04979	3.99346	4.02941	4.49821
1.55586	3.95276	1.43122	4.40975	4.531	4.50359	1.38294	3.4835	3.05267	4.40975	4.531	4.50359
1.84402	1.87489	1.43247	1.47578	4.07317	4.50467	3.91538	3.1207	3.05354	1.47578	4.07317	4.50467
3.73498	3.23329	1.43305	4.39032	5.35689	4.50656	3.20893	3.18156	3.0575	4.39032	5.35689	4.50656
1.5851	-1.18535	1.43336	3.45651	4.8039	4.51266	3.08437	3.43491	3.05831	3.45651	4.8039	4.51266
2.21019	1.93384	1.43503	3.51765	3.71784	4.51306	2.94588	2.74384	3.05867	3.51765	3.71784	4.51306
2.51209	0.558993	1.43587	3.83521	3.57532	4.5188	3.55438	3.485	3.05867	3.83521	3.57532	4.5188
4.12775	1.77273	1.43722	5.03392	4.7718	4.51916	2.8488	3.30746	3.05984	5.03392	4.7718	4.51916
2.93653	0.648796	1.43849	2.42319	4.80641	4.51938	3.36752	3.15826	3.06011	2.42319	4.80641	4.51938
0.629856	1.10926	1.43912	3.89016	4.87611	4.52042	2.14718	3.30018	3.06064	3.89016	4.87611	4.52042
3.68453	0.977357	1.43951	3.7549	4.26428	4.5283	3.47488	3.05769	3.06075	3.7549	4.26428	4.5283
1.57967	0.113038	1.44107	4.2898	4.23774	4.52889	3.46542	3.41136	3.061	4.2898	4.23774	4.52889
3.12507	1.93079	1.44252	3.32179	4.78332	4.52962	2.93657	3.21136	3.06176	3.32179	4.78332	4.52962
2.48443	1.88359	1.44398	3.62322	4.73814	4.53029	2.42196	3.06234	3.06298	3.62322	4.73814	4.53029
3.06029	0.396074	1.44468	3.52748	4.66646	4.53166	2.56567	3.36817	3.064	3.52748	4.66646	4.53166
1.67807	2.30373	1.4453	4.13709	4.56712	4.54057	1.87099	3.7109	3.064	4.13709	4.56712	4.54057
1.2811	0.709815	1.44636	4.27625	4.71432	4.55074	3.53993	3.04939	3.0645	4.27625	4.71432	4.55074
3.10891	1.94115	1.44669	4.91486	4.56518	4.55679	2.0595	3.16783	3.06713	4.91486	4.56518	4.55679
3.16649	2.18398	1.44754	2.93589	4.07982	4.57534	3.0477	2.77189	3.06749	2.93589	4.07982	4.57534
2.47397	1.37973	1.4483	4.20437	4.85976	4.5822	3.28873	2.84793	3.06829	4.20437	4.85976	4.5822
2.87115	0.685978	1.45013	3.57308	5.13712	4.5829	3.33367	3.1929	3.06829	3.57308	5.13712	4.5829
2.3944	-1.02567	1.45061	5.801	4.11057	4.58311	3.37766	3.39461	3.06909	5.801	4.11057	4.58311
2.58284	2.04526	1.4513	3.1985	4.87404	4.58666	2.55609	3.09715	3.0691	3.1985	4.87404	4.58666
3.73524	1.24541	1.45213	2.77453	3.96993	4.58717	2.77795	2.7554	3.07026	2.77453	3.96993	4.58717
2.34677	1.83992	1.45543	3.48728	4.16398	4.58911	2.66164	3.5933	3.07026	3.48728	4.16398	4.58911
3.13064	2.26197	1.45745	2.29524	4.45411	4.59087	2.43833	3.26877	3.07317	2.29524	4.45411	4.59087
1.70659	2.02349	1.45914	5.02969	4.86528	4.59196	2.77987	3.32173	3.07324	5.02969	4.86528	4.59196
3.36284	1.17834	1.46171	4.38782	4.44591	4.59322	2.94633	3.37093	3.07475	4.38782	4.44591	4.59322
2.74041	-0.00757166	1.46231	2.93653	4.56835	4.59474	1.27904	2.65911	3.07515	2.93653	4.56835	4.59474
3.1568	1.25962	1.4638	1.44225	4.53179	4.59926	2.09889	2.86756	3.07617	1.44225	4.53179	4.59926
2.22959	3.06249	1.46476	3.64793	4.69879	4.60419	2.6658	3.0577	3.07741	3.64793	4.69879	4.60419
5.97705	1.3985	1.46587	2.68693	4.46525	4.60578	3.03604	3.70302	3.07785	2.68693	4.46525	4.60578
1.09401	0.653635	1.46783	3.96949	4.94579	4.60634	2.43427	3.06965	3.08016	3.96949	4.94579	4.60634
2.17889	1.17613	1.46859	5.22599	3.58398	4.60847	3.16206	3.53456	3.08016	5.22599	3.58398	4.60847
1.9838	1.93058	1.47026	3.82825	4.34197	4.61253	2.40051	3.44838	3.0834	3.82825	4.34197	4.61253
3.03047	1.12912	1.47204	4.15847	5.05422	4.62133	2.87933	3.68801	3.08361	4.15847	5.05422	4.62133
2.68415	2.47166	1.47333	3.89085	4.61777	4.62289	2.15833	3.02831	3.08391	3.89085	4.61777	4.62289
1.90526	1.2752	1.47481	3.8467	4.83276	4.62457	1.62363	3.0045	3.08541	3.8467	4.83276	4.62457
3.11759	0.272493	1.47483	5.43345	5.23344	4.62476	2.91087	3.20346	3.08703	5.43345	5.23344	4.62476
4.96907	2.69099	1.47542	3.58167	4.97098	4.62496	1.85746	2.63743	3.08844	3.58167	4.97098	4.62496
3.76263	1.11724	1.4764	3.70583	4.4638	4.62755	2.66317	3.46362	3.0885	3.70583	4.4638	4.62755
5.65937	2.07424	1.4771	4.52741	4.90519	4.62845	3.78725	3.63055	3.0888	4.52741	4.90519	4.62845
4.30219	3.88666	1.47883	2.65332	3.26846	4.62957	2.49646	2.42382	3.09078	2.65332	3.26846	4.62957
2.99017	2.14347	1.47994	3.34201	4.39355	4.63196	2.92027	2.66549	3.0909	3.34201	4.39355	4.63196
1.32737	2.10453	1.48097	4.46522	4.8076	4.6325	3.7663	3.31379	3.09486	4.46522	4.8076	4.6325
4.78335	2.61646	1.48177	3.94513	4.59657	4.63263	3.43398	2.40446	3.096	3.94513	4.59657	4.63263
3.52528	1.51489	1.48295	3.87424	4.78993	4.63417	1.71894	3.01303	3.09635	3.87424	4.78993	4.63417
6.60788	1.24092	1.48594	4.21755	4.83255	4.6351	2.55385	3.40446	3.09679	4.21755	4.83255	4.6351
2.61508	1.33949	1.48848	4.4803	4.47152	4.63576	2.90194	3.29822	3.09714	4.4803	4.47152	4.63576
4.3057	2.04953	1.48924	3.82405	3.56171	4.64135	3.14866	3.30678	3.09722	3.82405	3.56171	4.64135
4.79045	1.40842	1.49209	2.77222	4.01549	4.651	3.07601	3.44721	3.09744	2.77222	4.01549	4.651
2.15433	2.46859	1.49296	2.99763	4.92563	4.65309	4.00391	3.10913	3.09792	2.99763	4.92563	4.65309
3.0851	2.29744	1.49352	4.94489	4.04657	4.65792	2.21131	3.55212	3.09792	4.94489	4.04657	4.65792
3.88661	-2.61171	1.49471	4.46204	4.34948	4.66607	2.67483	3.44253	3.09806	4.46204	4.34948	4.66607
0.592766	1.5001	1.49482	4.87733	4.22979	4.66888	2.67414	3.11587	3.09827	4.87733	4.22979	4.66888
8.11133	3.12802	1.49482	3.60573	4.52933	4.67243	3.0464	2.88075	3.10044	3.60573	4.52933	4.67243
2.82501	1.97969	1.49742	6.21229	4.59733	4.67659	2.63302	3.00226	3.10054	6.21229	4.59733	4.67659
2.76968	2.18525	1.49846	5.46253	4.77772	4.68206	2.48468	3.41023	3.10198	5.46253	4.77772	4.68206
3.20708	1.61827	1.49934	3.73512	5.32257	4.69581	2.1842	2.36515	3.10217	3.73512	5.32257	4.69581
2.88049	0.454602	1.49944	3.98129	4.44886	4.70088	3.073	3.69969	3.10538	3.98129	4.44886	4.70088
3.7462	1.40752	1.49944	3.97053	4.79667	4.70209	3.647	3.87802	3.10651	3.97053	4.79667	4.70209
4.61883	1.82386	1.5016	5.69797	4.61759	4.70416	3.18834	2.80776	3.10764	5.69797	4.61759	4.70416
1.49117	0.836872	1.50503	4.19884	5.52278	4.70882	2.9306	3.31688	3.11056	4.19884	5.52278	4.70882
2.87702	-0.0450933	1.50845	5.71681	5.70737	4.70997	2.307	4.09226	3.1115	5.71681	5.70737	4.70997
3.18038	1.72381	1.50948	4.12272	4.81955	4.71001	1.96961	3.43172	3.1121	4.12272	4.81955	4.71001
3.55438	2.97153	1.51005	5.92132	4.56021	4.71052	3.08788	3.66266	3.11504	5.92132	4.56021	4.71052
3.55628	1.17993	1.51006	3.99407	4.42431	4.71423	3.35349	3.61499	3.11511	3.99407	4.42431	4.71423
3.19006	2.81714	1.51025	3.74864	4.88787	4.71593	2.56174	2.38028	3.11806	3.74864	4.88787	4.71593
4.11324	2.04447	1.51054	4.06861	4.71181	4.7251	3.34091	2.54241	3.12095	4.06861	4.71181	4.7251
2.91071	0.0502943	1.51099	2.74975	4.23138	4.73558	2.70476	2.75116	3.12095	2.74975	4.23138	4.73558
2.57191	1.56093	1.51101	3.58659	5.49705	4.73565	2.66684	3.3774	3.12318	3.58659	5.49705	4.73565
2.34896	1.70896	1.51114	5.19791	4.53909	4.73573	2.85476	2.83918	3.1243	5.19791	4.53909	4.73573
6.12774	2.03882	1.51198	3.75138	4.56959	4.7406	3.12049	2.87831	3.1243	3.75138	4.56959	4.7406
2.80322	0.257354	1.51344	4.76774	4.28372	4.74258	2.6762	3.69257	3.12452	4.76774	4.28372	4.74258
1.2395	1.73281	1.51736	4.96103	4.76575	4.74583	2.85796	3.55771	3.12653	4.96103	4.76575	4.74583
3.68307	1.58665	1.51779	3.82615	4.70724	4.75087	2.75827	3.85304	3.12776	3.82615	4.70724	4.75087
3.24348	1.77599	1.51946	3.95445	4.87158	4.7513	2.59034	3.0929	3.12863	3.95445	4.87158	4.7513
2.22925	1.34586	1.5195	5.01452	4.94173	4.75482	3.64879	3.51879	3.13008	5.01452	4.94173	4.75482
3.80582	2.06227	1.52239	3.44104	5.16054	4.75501	3.19631	3.3573	3.13017	3.44104	5.16054	4.75501
1.31364	1.00528	1.52317	3.71391	4.99619	4.75753	2.59974	3.23805	3.13128	3.71391	4.99619	4.75753
2.84578	2.65911	1.52442	4.57521	4.70197	4.75911	0.895959	3.28545	3.133	4.57521	4.70197	4.75911
3.75334	2.16959	1.52508	5.31369	4.13859	4.76275	2.07531	2.73016	3.13461	5.31369	4.13859	4.76275
2.94029	1.02029	1.52664	4.48851	4.49629	4.76453	3.12165	3.68606	3.13822	4.48851	4.49629	4.76453
1.76926	0.1808	1.52678	4.01692	4.99142	4.76592	3.40026	4.13069	3.13869	4.01692	4.99142	4.76592
2.46875	1.87799	1.52873	3.90391	5.15153	4.77462	2.61062	2.73443	3.14009	3.90391	5.15153	4.77462
4.26631	2.51039	1.52921	4.14198	4.70985	4.77542	3.16064	3.2723	3.14187	4.14198	4.70985	4.77542
2.16719	1.986	1.52925	3.73538	4.96782	4.77916	2.00719	3.49205	3.1434	3.73538	4.96782	4.77916
5.01694	-0.216797	1.52974	4.35169	4.37468	4.78059	2.45851	3.44073	3.14387	4.35169	4.37468	4.78059
3.88123	2.15531	1.52974	3.90923	4.69502	4.78146	2.90282	3.31978	3.14484	3.90923	4.69502	4.78146
2.46371	1.23075	1.52986	4.42285	5.60818	4.78335	3.00762	3.07585	3.14843	4.42285	5.60818	4.78335
3.31215	0.51082	1.5331	3.8514	4.72578	4.7834	2.55101	2.98538	3.14953	3.8514	4.72578	4.7834
1.34073	1.90681	1.53748	5.33902	5.25044	4.79059	2.22198	2.90807	3.15096	5.33902	5.25044	4.79059
0.498154	3.07847	1.53951	3.38206	4.82837	4.79343	2.75897	3.53315	3.15205	3.38206	4.82837	4.79343
2.91595	1.59701	1.54178	3.77295	5.5223	4.79508	3.26285	3.05695	3.15248	3.77295	5.5223	4.79508
1.69013	1.29231	1.54716	4.08359	4.61229	4.80026	3.55355	3.44769	3.15357	4.08359	4.61229	4.80026
4.52743	0.964868	1.54757	4.63436	4.58003	4.80286	3.1862	2.58485	3.15907	4.63436	4.58003	4.80286
5.05092	2.95583	1.54794	0.600964	3.89077	4.8072	2.69715	1.72389	3.15995	0.600964	3.89077	4.8072
2.2038	0.626726	1.54871	4.43922	5.42778	4.81198	2.07613	2.51052	3.16074	4.43922	5.42778	4.81198
2.53917	1.69265	1.55281	4.86702	4.63402	4.81211	2.58026	3.27062	3.16087	4.86702	4.63402	4.81211
3.33568	0.688739	1.55625	4.23948	5.14931	4.81241	2.43247	3.37526	3.16108	4.23948	5.14931	4.81241
1.35719	1.54837	1.55655	5.24972	5.02472	4.81637	2.99188	3.28034	3.16217	5.24972	5.02472	4.81637
3.29821	1.9225	1.55734	3.79767	4.29944	4.82563	2.72737	2.42781	3.16324	3.79767	4.29944	4.82563
4.03427	1.35192	1.55913	3.79421	4.79467	4.82722	2.47098	2.81222	3.16401	3.79421	4.79467	4.82722
1.57252	0.752456	1.56095	5.1523	4.63618	4.8273	1.9744	2.8488	3.1651	5.1523	4.63618	4.8273
1.92708	1.42208	1.56179	4.69411	3.80379	4.82866	2.68626	2.89372	3.16664	4.69411	3.80379	4.82866
1.90782	1.13455	1.56235	3.21486	4.75445	4.83168	2.70428	3.58933	3.16713	3.21486	4.75445	4.83168
3.16998	1.89921	1.56246	3.88843	4.77347	4.83328	3.74185	3.798	3.17038	3.88843	4.77347	4.83328
-0.592808	2.11012	1.56301	4.1353	4.89489	4.83924	2.80696	3.29335	3.17079	4.1353	4.89489	4.83924
1.8871	0.268286	1.56419	4.4921	4.63954	4.8462	2.71293	3.97819	3.17262	4.4921	4.63954	4.8462
2.92844	2.33482	1.56466	3.26765	4.85233	4.85124	3.26876	2.80403	3.17364	3.26765	4.85233	4.85124
3.86617	2.15094	1.56754	5.29003	5.01392	4.85169	1.52442	2.63818	3.17558	5.29003	5.01392	4.85169
0.488264	1.40351	1.56769	4.91254	4.64977	4.85216	2.20913	2.96734	3.17648	4.91254	4.64977	4.85216
2.39664	1.66596	1.56847	2.6224	4.59081	4.8525	2.8966	3.56352	3.17788	2.6224	4.59081	4.8525
2.54532	-0.340892	1.56955	3.34892	5.00333	4.85533	3.85293	3.24091	3.17896	3.34892	5.00333	4.85533
3.78078	1.94561	1.5711	4.58424	5.05709	4.85872	2.76969	3.15897	3.1811	4.58424	5.05709	4.85872
1.29694	0.939518	1.57129	4.49771	4.8814	4.86616	3.41847	2.3312	3.18126	4.49771	4.8814	4.86616
3.00077	1.79509	1.57259	5.79627	4.85877	4.86621	2.35896	3.83175	3.18185	5.79627	4.85877	4.86621
-1.44343	2.87349	1.57659	5.68759	4.93657	4.87037	3.20137	2.6814	3.18292	5.68759	4.93657	4.87037
3.24747	2.53721	1.57753	4.48986	4.99693	4.87575	2.77552	3.17794	3.18354	4.48986	4.99693	4.87575
2.53675	1.85004	1.57755	4.69858	5.28499	4.87598	3.15686	3.56921	3.18568	4.69858	5.28499	4.87598
1.59962	1.50015	1.57848	3.99851	4.81657	4.87924	2.3675	3.42016	3.18602	3.99851	4.81657	4.87924
2.97821	0.964232	1.5814	3.781	5.00901	4.88145	3.68541	3.39824	3.18888	3.781	5.00901	4.88145
3.13397	1.338	1.5867	4.01923	5.10385	4.88391	2.15312	3.57624	3.18962	4.01923	5.10385	4.88391
2.99126	2.42167	1.58815	4.64419	4.81728	4.89075	3.53121	3.46768	3.19236	4.64419	4.81728	4.89075
2.54083	2.90996	1.58866	4.827	4.78301	4.89126	2.29782	2.73936	3.19282	4.827	4.78301	4.89126
1.89352	1.82229	1.593	4.53484	4.91612	4.89415	3.44182	2.81691	3.19324	4.53484	4.91612	4.89415
2.94831	0.553297	1.59349	3.99261	5.07599	4.89556	3.42903	3.2108	3.19449	3.99261	5.07599	4.89556
3.12356	1.60351	1.5962	6.57198	5.25356	4.89686	3.20613	3.59884	3.19682	6.57198	5.25356	4.89686
1.72855	0.67827	1.59927	4.70762	4.96944	4.89924	2.99354	3.6814	3.1998	4.70762	4.96944	4.89924
3.3717	1.36892	1.59987	4.79984	4.35106	4.90771	2.50257	3.12333	3.20018	4.79984	4.35106	4.90771
4.703	1.69688	1.60006	4.49105	5.2539	4.90985	2.52534	3.09784	3.20159	4.49105	5.2539	4.90985
3.02335	1.09906	1.60083	4.64416	5.09254	4.90998	2.31407	3.28684	3.2023	4.64416	5.09254	4.90998
2.71886	2.13283	1.60248	5.19751	4.88445	4.91331	3.10788	3.2428	3.20431	5.19751	4.88445	4.91331
-0.845985	1.00752	1.60264	4.80238	4.74328	4.91509	3.28802	2.53809	3.20805	4.80238	4.74328	4.91509
2.82402	1.23666	1.60366	4.39417	4.96379	4.91893	2.79001	3.35512	3.20993	4.39417	4.96379	4.91893
1.18099	2.96898	1.60403	3.53541	5.2894	4.92005	3.58396	3.53046	3.20997	3.53541	5.2894	4.92005
3.49351	2.00672	1.6056	4.72261	4.83945	4.93951	2.72897	2.72361	3.21019	4.72261	4.83945	4.93951
2.91115	3.52006	1.60603	4.79795	5.24723	4.93986	2.70529	3.07921	3.21124	4.79795	5.24723	4.93986
1.71694	0.765704	1.60879	5.58871	4.89587	4.94878	2.55668	2.96221	3.21334	5.58871	4.89587	4.94878
3.18434	1.07956	1.60879	4.56747	4.53081	4.95275	3.41275	2.95757	3.21753	4.56747	4.53081	4.95275
3.00334	0.554389	1.612	4.95001	6.43119	4.95286	3.30324	3.42519	3.2193	4.95001	6.43119	4.95286
2.31957	1.11702	1.61358	3.87562	4.26404	4.95598	2.57991	3.82369	3.2195	3.87562	4.26404	4.95598
2.26436	-0.503192	1.61414	5.4834	4.51515	4.96019	2.15686	2.23077	3.22271	5.4834	4.51515	4.96019
3.08376	2.04714	1.61644	3.78992	5.27393	4.96536	2.64793	3.33776	3.22347	3.78992	5.27393	4.96536
2.99578	1.76877	1.61949	4.66783	4.8832	4.96912	2.08007	2.65957	3.22375	4.66783	4.8832	4.96912
3.54266	1.07087	1.62054	4.7265	5.61278	4.97758	2.13508	3.38435	3.22529	4.7265	5.61278	4.97758
2.6755	3.1404	1.62131	2.80202	4.78941	4.99104	3.2711	3.77146	3.22791	2.80202	4.78941	4.99104
3.82976	1.87577	1.62334	3.92206	5.40697	4.99258	2.80615	3.75787	3.22798	3.92206	5.40697	4.99258
1.43086	2.07595	1.63022	5.47282	5.21069	5.02883	3.22056	3.54408	3.22851	5.47282	5.21069	5.02883
4.05002	0.260698	1.63494	5.15673	4.90414	5.03637	2.93463	3.2788	3.2309	5.15673	4.90414	5.03637
3.33433	1.75075	1.63494	4.43155	4.76825	5.03669	2.84417	3.92529	3.23337	4.43155	4.76825	5.03669
2.91988	0.838375	1.63556	4.50464	5.03882	5.04573	1.97888	2.57511	3.23369	4.50464	5.03882	5.04573
3.77282	2.27616	1.63929	4.57759	5.03885	5.04959	2.5924	2.9135	3.2341	4.57759	5.03885	5.04959
2.32757	2.08032	1.63966	2.8912	4.66902	5.05757	2.85705	2.93275	3.23576	2.8912	4.66902	5.05757
3.59318	2.54419	1.63966	4.33106	5.00323	5.06062	3.24385	3.46253	3.23842	4.33106	5.00323	5.06062
2.16353	0.745427	1.64119	4.81487	5.15623	5.07097	3.3699	3.19744	3.23885	4.81487	5.15623	5.07097
3.78836	2.52909	1.64216	4.77852	5.42839	5.08484	3.20784	3.83145	3.23945	4.77852	5.42839	5.08484
3.43898	2.034	1.64325	3.61037	5.26017	5.0861	3.19778	3.24391	3.24048	3.61037	5.26017	5.0861
3.27883	2.09365	1.64431	4.18803	4.19786	5.08715	2.67049	2.12377	3.24253	4.18803	4.19786	5.08715
2.54166	1.49828	1.64589	4.39427	5.40027	5.09977	2.07457	3.06573	3.24325	4.39427	5.40027	5.09977
4.21115	1.87151	1.64687	5.24809	6.18282	5.10335	2.87271	3.64486	3.24645	5.24809	6.18282	5.10335
3.82665	3.41941	1.64762	4.45809	4.46581	5.10489	2.72598	3.693	3.24865	4.45809	4.46581	5.10489
4.36016	2.55431	1.652	4.89586	4.92661	5.11487	3.55892	3.8346	3.25172	4.89586	4.92661	5.11487
-0.998949	1.73212	1.65274	7.14792	5.18356	5.11701	3.3019	3.60501	3.25243	7.14792	5.18356	5.11701
2.3538	2.74416	1.6537	4.2236	5.08563	5.11815	3.29059	3.52814	3.25563	4.2236	5.08563	5.11815
2.60085	1.58414	1.65779	3.97932	5.22362	5.12669	3.64981	3.34514	3.2567	3.97932	5.22362	5.12669
2.42001	2.70802	1.65862	5.3812	5.69519	5.14355	2.23383	3.25259	3.25899	5.3812	5.69519	5.14355
5.25537	0.348979	1.66061	5.49564	5.41951	5.15094	2.94975	3.0409	3.25944	5.49564	5.41951	5.15094
2.42506	1.26127	1.66061	4.29278	5.16795	5.15105	2.98787	3.53794	3.26088	4.29278	5.16795	5.15105
-0.835331	3.64685	1.66078	3.55953	5.33952	5.15135	3.66216	3.83574	3.26205	3.55953	5.33952	5.15135
3.86873	1.33203	1.66129	4.6411	5.6434	5.15529	3.15316	3.94191	3.26248	4.6411	5.6434	5.15529
4.26642	2.19211	1.66241	3.06233	4.97748	5.16138	3.14074	2.5093	3.2626	3.06233	4.97748	5.16138
4.54851	3.43667	1.66247	4.95481	5.24468	5.1648	2.21243	2.93024	3.26306	4.95481	5.24468	5.1648
3.34248	1.91262	1.66369	2.79874	4.57572	5.16568	3.12009	3.11068	3.26319	2.79874	4.57572	5.16568
3.66761	1.24527	1.66387	4.41993	5.40485	5.1678	1.72322	2.26639	3.26532	4.41993	5.40485	5.1678
2.04167	1.55184	1.66519	5.60867	5.3126	5.17112	3.56806	3.66925	3.26579	5.60867	5.3126	5.17112
3.38539	1.40287	1.66644	5.60451	5.50795	5.18227	2.81453	3.30233	3.26711	5.60451	5.50795	5.18227
4.24117	1.04887	1.66676	5.29895	5.23605	5.18274	3.12848	3.1625	3.26983	5.29895	5.23605	5.18274
3.88601	1.94736	1.67203	2.63318	4.95299	5.18645	2.36501	3.82727	3.27026	2.63318	4.95299	5.18645
1.90237	0.9821	1.67296	3.84679	5.2854	5.19119	4.04108	3.6717	3.27053	3.84679	5.2854	5.19119
3.6913	1.45009	1.67315	4.1633	5.15366	5.19692	3.32013	2.58535	3.27185	4.1633	5.15366	5.19692
1.30558	2.60984	1.67357	5.51202	5.28225	5.19794	2.73095	3.40673	3.27313	5.51202	5.28225	5.19794
3.13145	1.97818	1.67393	3.72762	5.5732	5.19916	2.55266	3.95382	3.27614	3.72762	5.5732	5.19916
1.87224	0.915744	1.67602	3.74728	5.33839	5.2026	3.46573	2.89289	3.27784	3.74728	5.33839	5.2026
3.61733	1.59331	1.67948	4.02232	4.04403	5.20749	3.59135	3.88339	3.27915	4.02232	4.04403	5.20749
2.13578	1.63297	1.67992	4.61614	4.85806	5.20981	2.92657	3.79554	3.27959	4.61614	4.85806	5.20981
4.55361	3.93282	1.68068	5.27944	5.08974	5.21095	2.89175	3.5452	3.28159	5.27944	5.08974	5.21095
2.51058	2.21721	1.68223	4.11648	5.04325	5.21785	3.36989	4.0564	3.28171	4.11648	5.04325	5.21785
3.71813	0.456905	1.68227	4.06805	5.81771	5.23973	2.99101	3.77397	3.28273	4.06805	5.81771	5.23973
2.6037	1.38509	1.68248	4.42394	5.61546	5.24358	3.43853	2.35834	3.28343	4.42394	5.61546	5.24358
2.04396	0.948072	1.68266	5.06364	5.48246	5.2447	2.9852	3.23728	3.28343	5.06364	5.48246	5.2447
2.84984	1.39908	1.68507	4.24309	5.29011	5.25827	2.75065	3.17794	3.28373	4.24309	5.29011	5.25827
2.86069	0.995163	1.68584	5.85553	5.85487	5.26692	3.22376	3.62368	3.28473	5.85553	5.85487	5.26692
3.32765	2.23818	1.68881	4.26744	4.73876	5.26767	3.28205	3.76838	3.28642	4.26744	4.73876	5.26767
3.60682	0.194285	1.68886	3.68592	5.45281	5.29942	1.03863	3.01495	3.28851	3.68592	5.45281	5.29942
2.30162	2.20267	1.69065	5.72738	5.25319	5.30011	3.40466	3.57926	3.28868	5.72738	5.25319	5.30011
1.36483	1.5238	1.69188	4.87693	5.21632	5.30091	3.21844	3.50039	3.28968	4.87693	5.21632	5.30091
3.82405	2.60293	1.69188	4.50392	4.50134	5.31182	1.98734	3.3173	3.29456	4.50392	4.50134	5.31182
4.98323	1.14387	1.6928	4.64763	5.12437	5.31361	2.35896	3.13181	3.29465	4.64763	5.12437	5.31361
3.05444	0.444743	1.69415	4.10941	5.03712	5.31637	2.99145	3.21073	3.29522	4.10941	5.03712	5.31637
3.31662	2.88166	1.69559	4.75705	5.2191	5.3226	2.36927	2.55365	3.30016	4.75705	5.2191	5.3226
3.43287	2.71124	1.69561	3.79873	4.96212	5.32895	2.81453	3.56544	3.30016	3.79873	4.96212	5.32895
3.50687	0.0689966	1.69588	3.71794	5.48588	5.32899	2.80696	3.79112	3.30115	3.71794	5.48588	5.32899
2.69305	1.9407	1.69654	3.73321	5.27712	5.32955	3.30892	3.82471	3.30184	3.73321	5.27712	5.32955
-0.423278	0.903965	1.6968	5.41431	4.50195	5.34454	3.42257	3.43642	3.30214	5.41431	4.50195	5.34454
3.96361	2.02014	1.69818	4.7714	5.24808	5.35511	3.07865	3.89616	3.30237	4.7714	5.24808	5.35511
3.06282	1.92912	1.69866	3.95173	5.35549	5.36192	3.22765	3.38929	3.30282	3.95173	5.35549	5.36192
2.20032	1.62802	1.69933	4.44551	5.56126	5.36437	2.65637	2.99497	3.30509	4.44551	5.56126	5.36437
1.47462	3.23863	1.69941	5.29879	5.74454	5.36524	3.90136	5.24872	3.30632	5.29879	5.74454	5.36524
2.62008	1.72103	1.70014	4.27891	5.2237	5.36919	2.71994	3.81488	3.30831	4.27891	5.2237	5.36919
2.94796	1.90097	1.70038	4.21231	5.31793	5.37251	3.20065	3.52655	3.30929	4.21231	5.31793	5.37251
2.87251	1.37148	1.70081	3.43757	5.00455	5.38005	2.4835	3.422	3.30997	3.43757	5.00455	5.38005
4.45037	2.75346	1.70096	3.77983	3.21705	5.38071	3.08126	3.48619	3.31223	3.77983	3.21705	5.38071
2.01428	0.756264	1.70328	5.09022	5.3606	5.38247	2.90593	3.77418	3.31223	5.09022	5.3606	5.38247
2.18106	1.39924	1.70447	4.63195	5.65922	5.38567	3.45632	3.37107	3.31331	4.63195	5.65922	5.38567
2.42312	1.52883	1.70574	5.33995	5.4991	5.39038	3.67856	3.6716	3.31377	5.33995	5.4991	5.39038
2.18436	2.0976	1.70646	4.64487	5.0397	5.39134	2.06904	2.81943	3.31543	4.64487	5.0397	5.39134
3.16322	1.71644	1.70737	3.51469	5.27696	5.41144	2.49763	3.02628	3.31641	3.51469	5.27696	5.41144
2.161	1.88895	1.70755	4.91325	5.46936	5.42456	2.77649	3.5653	3.31866	4.91325	5.46936	5.42456
2.83987	1.88756	1.70772	6.75139	4.8428	5.44361	3.97791	3.94918	3.31971	6.75139	4.8428	5.44361
1.59432	0.886086	1.71089	4.79749	5.64081	5.44721	2.60248	3.18533	3.3202	4.79749	5.64081	5.44721
2.5662	2.26009	1.71452	4.05522	5.48842	5.45171	3.06896	2.97035	3.32355	4.05522	5.48842	5.45171
4.56125	1.80646	1.71657	5.07869	5.46365	5.45408	3.24826	3.97715	3.32446	5.07869	5.46365	5.45408
2.78296	2.21299	1.71668	3.57853	5.57762	5.45456	3.04249	3.59206	3.32585	3.57853	5.57762	5.45456
0.486163	1.26144	1.7176	5.34831	4.49088	5.45532	2.72698	3.0625	3.32737	5.34831	4.49088	5.45532
-0.115745	1.31524	1.71928	4.25456	5.25308	5.46661	2.96257	3.64687	3.32987	4.25456	5.25308	5.46661
4.60424	-0.199507	1.71953	5.69031	5.20602	5.46972	1.50778	3.05829	3.33073	5.69031	5.20602	5.46972
2.73209	2.14907	1.7196	3.0947	5.98563	5.47339	3.62805	2.94676	3.33084	3.0947	5.98563	5.47339
1.7497	0.550671	1.7206	5.31234	5.7047	5.4937	2.06034	3.08435	3.33277	5.31234	5.7047	5.4937
2.17901	1.34562	1.72342	5.22725	5.60889	5.49711	2.86479	3.81572	3.33373	5.22725	5.60889	5.49711
0.50504	1.79608	1.72482	6.13353	5.34668	5.51026	3.75613	3.86394	3.3347	6.13353	5.34668	5.51026
3.07909	0.929815	1.72538	5.63206	5.78555	5.52981	2.28022	3.63526	3.33692	5.63206	5.78555	5.52981
3.22231	0.958668	1.72539	4.87339	5.46115	5.53639	3.18727	3.29335	3.33759	4.87339	5.46115	5.53639
3.60457	3.70356	1.72583	4.70296	5.56568	5.53821	2.99808	3.91644	3.33826	4.70296	5.56568	5.53821
2.01195	1.99671	1.72766	4.06072	5.72551	5.53846	3.1539	3.44562	3.33977	4.06072	5.72551	5.53846
3.20302	1.1681	1.7316	5.08251	5.5951	5.54561	2.82812	3.3408	3.34016	5.08251	5.5951	5.54561
4.28832	3.61178	1.73177	4.7866	5.83705	5.55012	2.49061	2.33097	3.34044	4.7866	5.83705	5.55012
2.18248	1.78865	1.7324	5.40137	5.79341	5.55249	3.3648	3.42128	3.3414	5.40137	5.79341	5.55249
1.58219	1.7831	1.73255	4.55482	5.95783	5.55397	3.21915	3.9348	3.34265	4.55482	5.95783	5.55397
3.85331	2.14056	1.73541	4.48497	5.90591	5.55479	3.80743	3.52864	3.34523	4.48497	5.90591	5.55479
3.37852	0.0344289	1.73853	4.84112	5.34403	5.5558	2.76189	3.37555	3.34799	4.84112	5.34403	5.5558
2.70944	2.04263	1.7406	3.83932	5.93893	5.55949	2.91561	2.99346	3.34865	3.83932	5.93893	5.55949
1.25294	2.21411	1.74174	5.89639	6.23962	5.56573	2.48468	3.77068	3.34865	5.89639	6.23962	5.56573
4.36098	2.47699	1.74187	5.11383	5.90549	5.56821	2.67104	3.17297	3.34906	5.11383	5.90549	5.56821
3.08733	1.9567	1.74609	5.17162	5.67578	5.57159	3.60083	3.21765	3.34961	5.17162	5.67578	5.57159
3.51869	1.52479	1.74742	2.38504	5.59168	5.57432	3.53175	3.33082	3.35056	2.38504	5.59168	5.57432
2.92718	0.945018	1.74837	5.28519	5.41212	5.58607	2.73247	3.84013	3.35056	5.28519	5.41212	5.58607
1.11076	1.24724	1.74868	1.53769	2.61996	5.5881	3.4109	3.7207	3.35181	1.53769	2.61996	5.5881
3.4581	2.2685	1.74928	4.82632	5.53276	5.5891	3.17163	2.79639	3.35218	4.82632	5.53276	5.5891
3.80654	2.60003	1.75237	4.73279	5.57335	5.59042	3.30626	3.64041	3.35247	4.73279	5.57335	5.59042
3.40624	2.97856	1.75439	5.29073	6.13916	5.6005	2.71086	3.67907	3.35247	5.29073	6.13916	5.6005
1.74809	2.12767	1.75457	5.39602	5.66742	5.60165	2.90944	3.21056	3.35342	5.39602	5.66742	5.60165
2.24978	1.47799	1.75744	4.26055	5.46908	5.60809	2.51049	3.31005	3.3544	4.26055	5.46908	5.60809
3.48945	1.82448	1.75807	4.28043	5.84717	5.61042	2.89571	3.43945	3.35492	4.28043	5.84717	5.61042
2.89797	1.74168	1.76054	5.22271	5.79009	5.61634	3.07576	3.31782	3.35653	5.22271	5.79009	5.61634
1.54141	1.34073	1.7624	4.11182	5.39439	5.62964	2.99563	3.07587	3.35682	4.11182	5.39439	5.62964
0.738924	-0.311825	1.7656	4.39786	5.5647	5.63528	2.94201	3.89849	3.36116	4.39786	5.5647	5.63528
1.5924	1.09509	1.76704	5.17663	5.66696	5.64157	2.25413	3.3502	3.36249	5.17663	5.66696	5.64157
2.05607	1.87819	1.76739	6.2081	6.18725	5.64278	2.22491	3.47183	3.36392	6.2081	6.18725	5.64278
2.27361	0.89108	1.76852	4.72448	5.89341	5.64857	3.0014	2.59626	3.3656	4.72448	5.89341	5.64857
2.12079	2.03934	1.76866	5.54191	5.75384	5.65523	3.71213	3.68905	3.36625	5.54191	5.75384	5.65523
3.47279	3.1215	1.7688	4.37609	6.01478	5.65632	3.49117	2.57511	3.36814	4.37609	6.01478	5.65632
3.10479	2.27524	1.76994	5.22674	5.67988	5.66683	1.37248	3.3323	3.3715	5.22674	5.67988	5.66683
4.01086	2.2719	1.77046	6.85137	5.76971	5.66773	2.90768	3.51743	3.37244	6.85137	5.76971	5.66773
2.29944	2.6212	1.77055	5.22207	5.82697	5.6799	2.72767	3.44165	3.37283	5.22207	5.82697	5.6799
3.7228	3.08549	1.77254	5.79283	5.50008	5.68431	2.70985	3.93489	3.37309	5.79283	5.50008	5.68431
2.32571	0.309473	1.77373	5.24916	5.60222	5.68907	3.57886	3.72861	3.37392	5.24916	5.60222	5.68907
3.41713	1.31683	1.77469	5.52961	5.34693	5.70065	3.49999	3.32443	3.37497	5.52961	5.34693	5.70065
2.31182	1.41103	1.77651	6.47345	5.71285	5.70268	2.75456	2.99889	3.37591	6.47345	5.71285	5.70268
3.70668	-0.410926	1.77738	5.56191	5.65153	5.71616	3.22836	4.25248	3.3762	5.56191	5.65153	5.71616
2.99358	1.54442	1.77865	2.85684	5.13364	5.71856	3.11471	4.14442	3.3777	2.85684	5.13364	5.71856
1.73192	1.34773	1.77936	5.1091	5.47274	5.72582	2.93812	3.7473	3.37778	5.1091	5.47274	5.72582
1.22708	2.02219	1.77983	5.16273	5.61687	5.7301	3.34614	3.91385	3.37861	5.16273	5.61687	5.7301
4.18495	2.11245	1.78321	4.6855	5.38637	5.73385	3.0324	3.34043	3.37926	4.6855	5.38637	5.73385
1.60987	0.837508	1.78536	4.10139	5.89417	5.75533	3.50156	3.74447	3.38549	4.10139	5.89417	5.75533
4.31662	1.57168	1.78607	5.47303	6.57347	5.75573	3.24491	3.35904	3.38575	5.47303	6.57347	5.75573
3.97916	2.18918	1.78742	4.58343	5.85565	5.76496	3.20137	3.09434	3.38976	4.58343	5.85565	5.76496
3.39575	2.24348	1.78799	4.34999	5.59972	5.76799	3.12842	3.24898	3.38991	4.34999	5.59972	5.76799
3.40991	1.63821	1.78813	4.30399	6.20167	5.77246	3.38321	3.7465	3.39004	4.30399	6.20167	5.77246
2.28854	0.90821	1.78869	4.99567	5.83521	5.78613	2.73095	3.39527	3.39069	4.99567	5.83521	5.78613
1.6997	1.24767	1.78918	4.59048	6.24675	5.7953	2.36799	3.18469	3.39133	4.59048	6.24675	5.7953
3.83994	1.79375	1.78965	5.08783	5.19107	5.79617	3.19305	3.47777	3.39161	5.08783	5.19107	5.79617
2.46317	1.78103	1.79348	5.06255	6.28115	5.79705	3.03637	4.01231	3.39323	5.06255	6.28115	5.79705
2.68841	2.70963	1.79486	3.9574	5.41094	5.79806	3.00183	2.95929	3.39347	3.9574	5.41094	5.79806
3.65899	1.48834	1.79542	5.06537	5.49433	5.79843	2.75948	3.05875	3.39557	5.06537	5.49433	5.79843
3.09151	2.82074	1.79631	5.24821	5.8623	5.79869	2.96426	3.52096	3.39677	5.24821	5.8623	5.79869
2.65044	1.20596	1.80107	4.56846	6.23042	5.8015	2.64898	3.66407	3.39834	4.56846	6.23042	5.8015
2.67823	1.73937	1.80265	6.67887	6.16629	5.80202	3.39743	3.6439	3.39862	6.67887	6.16629	5.80202
0.463529	1.32304	1.80313	4.50607	5.92312	5.80568	2.7063	2.28356	3.40018	4.50607	5.92312	5.80568
1.92104	-0.410775	1.80694	4.82503	5.89302	5.81551	2.55609	3.69957	3.40174	4.82503	5.89302	5.81551
2.4774	1.90676	1.80899	4.26713	5.74422	5.81984	3.61253	3.90359	3.40347	4.26713	5.74422	5.81984
4.10881	4.54016	1.81141	5.45818	5.8262	5.83118	4.23367	3.74362	3.40386	5.45818	5.8262	5.83118
3.59668	2.30333	1.81185	5.37744	6.31771	5.83351	4.67986	3.67683	3.40401	5.37744	6.31771	5.83351
2.37918	1.4822	1.81192	4.12125	5.83911	5.83565	2.95178	3.82301	3.4052	4.12125	5.83911	5.83565
2.9349	0.980055	1.81282	5.62732	5.85756	5.86368	3.52661	3.65425	3.40715	5.62732	5.85756	5.86368
4.07048	3.10662	1.81395	5.63315	5.90584	5.87359	3.42319	3.14792	3.4075	5.63315	5.90584	5.87359
0.595603	0.0455763	1.81682	5.33874	5.84242	5.88172	3.73601	3.5034	3.40901	5.33874	5.84242	5.88172
3.50525	2.2024	1.81839	4.95255	6.63033	5.88197	2.22198	3.50355	3.41169	4.95255	6.63033	5.88197
1.94646	4.2058	1.8191	5.67685	5.8129	5.8824	3.03967	3.90976	3.41734	5.67685	5.8129	5.8824
3.54698	1.41807	1.82034	6.12156	5.20377	5.8878	3.44332	3.83807	3.41772	6.12156	5.20377	5.8878
2.98326	2.18521	1.82141	4.50066	5.97039	5.89286	2.15341	3.72536	3.41938	4.50066	5.97039	5.89286
1.09903	1.64128	1.82432	3.70612	5.60234	5.89566	2.80696	3.5388	3.42042	3.70612	5.60234	5.89566
2.53579	0.381175	1.82435	6.50125	5.6162	5.90292	3.39545	3.44554	3.42044	6.50125	5.6162	5.90292
2.31143	1.97864	1.82671	4.78063	6.02275	5.907	2.81411	3.723	3.42422	4.78063	6.02275	5.907
3.61719	2.11149	1.82742	5.98061	6.21891	5.90897	2.17017	2.94714	3.42429	5.98061	6.21891	5.90897
3.40444	1.81948	1.8284	5.20772	5.89778	5.91318	3.68119	3.51436	3.42438	5.20772	5.89778	5.91318
1.95985	0.869248	1.83153	6.78831	5.94832	5.91469	2.16724	3.74917	3.42492	6.78831	5.94832	5.91469
4.01562	1.86222	1.83355	5.27441	6.00182	5.92232	2.95874	3.42018	3.42559	5.27441	6.00182	5.92232
3.06736	2.22229	1.83373	6.00353	6.41101	5.95375	2.18045	3.49641	3.42602	6.00353	6.41101	5.95375
1.99933	2.1357	1.83395	4.86801	5.13001	5.95616	2.49351	2.92844	3.42729	4.86801	5.13001	5.95616
2.8842	2.03702	1.83445	5.08628	6.14541	5.97277	2.95235	3.75253	3.42882	5.08628	6.14541	5.97277
2.72033	1.17407	1.83445	6.34616	6.11418	5.98177	2.37569	2.81902	3.43385	6.34616	6.11418	5.98177
0.829393	1.05296	1.83536	4.86593	5.96328	5.98329	3.18545	3.9597	3.44038	4.86593	5.96328	5.98329
3.14269	2.08443	1.83554	5.27845	5.95709	5.99224	3.59974	4.14749	3.441	5.27845	5.95709	5.99224
4.65531	1.39373	1.83718	4.7877	6.24867	6.00137	3.56946	3.6331	3.44166	4.7877	6.24867	6.00137
2.15015	1.87161	1.83846	5.08556	5.44943	6.02107	4.29369	3.90961	3.4419	5.08556	5.44943	6.02107
1.76191	1.7109	1.839	3.60167	5.90283	6.02338	3.08947	3.66818	3.44252	3.60167	5.90283	6.02338
2.76252	0.985284	1.84028	4.98522	6.07045	6.02594	3.99871	3.18845	3.44279	4.98522	6.07045	6.02594
3.3489	1.43643	1.84228	6.40614	5.79941	6.02902	3.16132	3.35249	3.44307	6.40614	5.79941	6.02902
3.17114	1.8486	1.84244	4.46607	6.02042	6.04812	3.68466	3.38829	3.44307	4.46607	6.02042	6.04812
3.51053	1.73093	1.84367	5.15619	5.6281	6.04904	2.81453	3.57271	3.44688	5.15619	5.6281	6.04904
3.92206	2.32472	1.84515	3.28042	5.53626	6.05171	2.66788	3.26054	3.44839	3.28042	5.53626	6.05171
4.48589	3.05277	1.84832	5.78123	6.17312	6.05438	3.47635	3.30595	3.44866	5.78123	6.17312	6.05438
2.57755	1.74652	1.85317	3.7951	6.88401	6.05721	2.94838	2.78327	3.44913	3.7951	6.88401	6.05721
1.54317	0.495709	1.85325	5.88363	5.97677	6.07946	2.08711	3.27403	3.44983	5.88363	5.97677	6.07946
2.95903	2.11884	1.8597	5.45184	6.12775	6.08143	2.81827	3.22407	3.45157	5.45184	6.12775	6.08143
3.55395	1.40874	1.85985	5.05605	5.84991	6.08449	3.06782	3.8214	3.4523	5.05605	5.84991	6.08449
0.415397	1.40978	1.86144	3.37121	5.91628	6.10124	3.17233	3.7202	3.4539	3.37121	5.91628	6.10124
0.654895	1.21452	1.86277	5.99598	6.49536	6.10445	3.08726	3.65516	3.45606	5.99598	6.49536	6.10445
2.45405	1.14722	1.86534	6.1224	6.27664	6.1092	3.39806	3.74507	3.4569	6.1224	6.27664	6.1092
2.60102	1.40765	1.86564	5.77242	6.29425	6.11361	3.86481	3.93002	3.4569	5.77242	6.29425	6.11361
3.98703	0.93033	1.8699	5.1725	6.29415	6.11633	2.54365	3.22932	3.45779	5.1725	6.29415	6.11633
3.01073	2.86113	1.87001	5.60039	6.16215	6.13051	3.66946	4.14402	3.45956	5.60039	6.16215	6.13051
2.5154	1.59841	1.87072	4.71625	6.37096	6.13252	3.34465	2.84915	3.46188	4.71625	6.37096	6.13252
4.39321	2.50223	1.87225	5.77	6.26607	6.13546	3.68312	3.76103	3.4621	5.77	6.26607	6.13546
3.34411	2.17368	1.87304	5.83869	6.06351	6.14716	2.49296	3.25584	3.46333	5.83869	6.06351	6.14716
2.50334	2.09186	1.87335	5.74094	6.29623	6.15378	3.04409	3.55631	3.4636	5.74094	6.29623	6.15378
1.51046	1.4136	1.87392	5.96558	6.23228	6.15959	3.45154	3.40391	3.46387	5.96558	6.23228	6.15959
2.27088	1.72962	1.87469	5.63524	6.22224	6.16049	3.1468	4.05091	3.46598	5.63524	6.22224	6.16049
3.72964	1.54948	1.87887	9.62383	6.95679	6.17008	3.74604	3.99761	3.46685	9.62383	6.95679	6.17008
6.94486	2.30218	1.88061	5.27691	5.9049	6.17033	3.96277	3.7366	3.46747	5.27691	5.9049	6.17033
3.03878	1.63076	1.88156	5.43157	6.1728	6.17216	2.53225	3.80348	3.47175	5.43157	6.1728	6.17216
4.0338	3.25195	1.88358	5.22788	5.62472	6.18856	3.57834	4.01312	3.47175	5.22788	5.62472	6.18856
2.65951	1.30616	1.88379	6.5092	6.34153	6.1914	3.77188	3.90915	3.474	6.5092	6.34153	6.1914
3.03272	1.76405	1.88446	6.04349	6.49169	6.19665	3.60548	3.26224	3.47734	6.04349	6.49169	6.19665
2.10148	2.19801	1.88456	5.43804	6.39267	6.19902	2.71441	3.23712	3.47986	5.43804	6.39267	6.19902
0.330922	0.152792	1.88805	1.96162	5.81834	6.20436	2.64953	3.6451	3.4816	1.96162	5.81834	6.20436
2.19562	1.94157	1.88932	5.14744	6.4227	6.20504	2.51031	3.2886	3.48257	5.14744	6.4227	6.20504
3.12495	1.64349	1.89026	5.20481	6.42752	6.21906	2.92594	2.64609	3.4831	5.20481	6.42752	6.21906
2.5722	0.811785	1.89235	5.69362	6.12944	6.21975	2.65203	3.36179	3.48354	5.69362	6.12944	6.21975
1.72285	1.32388	1.89273	5.66019	6.29735	6.22092	2.95535	3.48938	3.48358	5.66019	6.29735	6.22092
3.72933	2.84646	1.89677	6.03018	6.12183	6.22411	3.45274	2.6814	3.48395	6.03018	6.12183	6.22411
2.72091	0.505121	1.89764	6.11067	6.27371	6.23512	2.17487	3.32853	3.48426	6.11067	6.27371	6.23512
3.35107	1.86556	1.89775	6.11857	5.09267	6.25475	3.1044	2.99153	3.48569	6.11857	5.09267	6.25475
4.51666	2.14768	1.89887	6.39971	5.22559	6.27107	2.86955	3.88513	3.4857	6.39971	5.22559	6.27107
3.02788	2.0263	1.89919	5.8961	5.89875	6.29097	2.94719	2.88198	3.48792	5.8961	5.89875	6.29097
2.63096	2.6982	1.8996	6.0779	5.83957	6.29251	3.25525	3.605	3.48879	6.0779	5.83957	6.29251
3.41282	1.31286	1.90001	6.1244	5.67321	6.3275	3.9523	3.5902	3.48955	6.1244	5.67321	6.3275
2.54526	0.701771	1.90294	5.82921	6.29632	6.33086	2.8193	3.58808	3.49052	5.82921	6.29632	6.33086
5.02409	1.55121	1.90308	5.79167	6.28764	6.34208	3.44009	3.86854	3.49052	5.79167	6.28764	6.34208
3.19297	2.47467	1.90368	4.69011	6.38137	6.35686	3.58086	3.70199	3.49421	4.69011	6.38137	6.35686
2.80092	1.28028	1.90408	3.94999	6.21654	6.37056	3.51185	3.39542	3.49507	3.94999	6.21654	6.37056
3.12843	1.91743	1.9055	6.25068	5.64362	6.38688	3.25695	4.29204	3.49875	6.25068	5.64362	6.38688
3.75968	1.23625	1.90721	6.65149	6.53348	6.38856	4.3806	4.28576	3.49909	6.65149	6.53348	6.38856
2.19776	2.21147	1.91159	6.47718	7.06891	6.39059	4.14068	3.93918	3.49988	6.47718	7.06891	6.39059
5.08117	0.943819	1.9119	5.93761	6.16219	6.39193	2.42442	3.64926	3.50047	5.93761	6.16219	6.39193
3.07344	1.18682	1.91332	5.95577	6.31264	6.39822	3.43121	3.68849	3.50305	5.95577	6.31264	6.39822
2.78127	2.03768	1.91365	6.24357	5.75054	6.41153	2.92035	3.61095	3.50376	6.24357	5.75054	6.41153
3.4194	2.06903	1.91375	5.06447	6.25216	6.41605	2.0595	3.24799	3.50391	5.06447	6.25216	6.41605
2.29673	2.18798	1.9138	6.0381	6.34668	6.43014	3.42629	3.18156	3.50697	6.0381	6.34668	6.43014
2.86261	2.1218	1.91398	6.16433	6.10746	6.43412	3.50085	3.58261	3.50733	6.16433	6.10746	6.43412
3.36004	2.46051	1.91465	4.95968	6.536	6.44157	4.01032	3.8933	3.50767	4.95968	6.536	6.44157
1.69817	1.71566	1.91487	5.42371	6.38555	6.45389	2.55721	3.3573	3.50783	5.42371	6.38555	6.45389
3.61421	2.48673	1.91739	5.18467	6.61047	6.45644	3.44163	3.66063	3.50783	5.18467	6.61047	6.45644
2.61572	2.13418	1.91994	5.50738	6.74219	6.46058	3.15872	3.75217	3.51098	5.50738	6.74219	6.46058
3.73278	3.27143	1.92098	6.29218	6.6877	6.46874	3.04971	3.07016	3.51354	6.29218	6.6877	6.46874
2.82394	1.09003	1.9214	4.3845	5.91224	6.47007	2.24528	3.64413	3.51462	4.3845	5.91224	6.47007
3.19933	2.17569	1.92291	6.15239	6.13242	6.47057	3.18231	3.0205	3.51539	6.15239	6.13242	6.47057
3.28539	1.64918	1.92315	6.73484	6.99908	6.47626	3.40717	3.39641	3.51547	6.73484	6.99908	6.47626
5.40299	3.00961	1.9243	6.36924	6.61827	6.49006	4.34251	3.98129	3.51692	6.36924	6.61827	6.49006
1.8453	1.71495	1.9256	5.05672	6.30994	6.49094	3.11822	3.84461	3.51972	5.05672	6.30994	6.49094
1.77753	2.69699	1.9257	6.31942	6.38558	6.49596	3.59054	2.95339	3.52187	6.31942	6.38558	6.49596
0.58485	1.27012	1.92687	4.3823	5.77309	6.49759	3.60274	3.53329	3.5247	4.3823	5.77309	6.49759
3.57801	0.0401094	1.9272	5.19521	6.40248	6.50495	2.30253	3.47657	3.52503	5.19521	6.40248	6.50495
3.85469	1.05405	1.92752	6.21269	6.56954	6.51801	3.14057	3.8104	3.52529	6.21269	6.56954	6.51801
0.969673	1.17683	1.92803	5.26646	6.52725	6.52342	3.98743	3.59942	3.52594	5.26646	6.52725	6.52342
1.55181	2.02621	1.92829	4.96676	6.57478	6.53301	2.62576	3.19532	3.52672	4.96676	6.57478	6.53301
3.17048	1.48348	1.92877	6.84494	5.6337	6.54916	3.41709	3.78839	3.52759	6.84494	5.6337	6.54916
4.26625	3.76628	1.92923	5.98026	6.92229	6.56123	3.23297	2.93803	3.52948	5.98026	6.92229	6.56123
2.62727	1.97728	1.93333	5.45194	6.12189	6.56189	3.37088	3.28693	3.53058	5.45194	6.12189	6.56189
2.94035	3.38069	1.93471	4.1747	6.50562	6.56753	3.91882	3.46362	3.5381	4.1747	6.50562	6.56753
2.58412	2.12176	1.93496	7.41969	6.32438	6.58565	3.57194	4.24494	3.53836	7.41969	6.32438	6.58565
3.50332	2.13599	1.93506	6.21694	6.71344	6.58972	3.68902	3.52797	3.54171	6.21694	6.71344	6.58972
2.66764	1.57541	1.93913	6.19422	7.62969	6.60962	2.37569	3.35451	3.54469	6.19422	7.62969	6.60962
2.72123	2.41046	1.9427	6.36455	6.48873	6.63217	3.97686	3.55326	3.54661	6.36455	6.48873	6.63217
3.77971	4.20303	1.9444	6.38153	6.31568	6.66008	3.30524	3.78007	3.54719	6.38153	6.31568	6.66008
2.48446	1.29345	1.94495	6.34169	6.39422	6.6843	3.01703	3.34955	3.54741	6.34169	6.39422	6.6843
3.4542	0.912859	1.94612	5.74382	6.80394	6.69193	3.19089	4.09075	3.5485	5.74382	6.80394	6.69193
2.87163	1.52852	1.94678	5.22663	6.69916	6.72625	3.73811	3.64043	3.54933	5.22663	6.69916	6.72625
3.00986	0.881739	1.94833	6.38045	6.27278	6.74031	2.67817	3.4755	3.55154	6.38045	6.27278	6.74031
3.01112	0.541832	1.95159	5.61569	7.11782	6.74492	4.02528	3.68047	3.55323	5.61569	7.11782	6.74492
1.06192	1.59825	1.95259	6.98331	6.67475	6.75574	3.2463	3.22215	3.55702	6.98331	6.67475	6.75574
0.742983	3.43454	1.95413	6.4745	7.19182	6.76641	3.15351	3.94085	3.55759	6.4745	7.19182	6.76641
1.97962	1.21092	1.95592	6.56975	7.26212	6.76642	2.76092	3.50644	3.55784	6.56975	7.26212	6.76642
3.61879	2.20205	1.95705	5.28979	6.61845	6.7686	3.25659	3.72929	3.55924	5.28979	6.61845	6.7686
4.01865	1.99262	1.95729	6.56183	6.93312	6.77253	3.53324	3.4212	3.56541	6.56183	6.93312	6.77253
2.46346	0.793747	1.95793	6.67389	6.79788	6.77966	3.3019	3.57073	3.56605	6.67389	6.79788	6.77966
3.93716	2.11863	1.95815	6.79964	6.80356	6.79093	3.51298	3.35568	3.56712	6.79964	6.80356	6.79093
3.44595	2.38673	1.95896	6.17229	7.07796	6.80804	3.08437	3.95748	3.56851	6.17229	7.07796	6.80804
2.7598	2.3117	1.96237	5.88328	6.64977	6.80965	2.82391	3.67896	3.57226	5.88328	6.64977	6.80965
5.89028	1.30281	1.96291	6.44347	6.25843	6.81271	4.74226	4.23207	3.57589	6.44347	6.25843	6.81271
3.74762	2.28453	1.96366	5.75785	6.76891	6.82254	3.52746	3.85248	3.576	5.75785	6.76891	6.82254
4.12465	1.97188	1.96512	6.68945	6.09854	6.82262	3.04531	3.5506	3.57713	6.68945	6.09854	6.82262
1.91211	2.37395	1.96578	7.29224	7.17988	6.8301	3.92648	3.48033	3.57738	7.29224	7.17988	6.8301
2.68344	0.920166	1.96697	6.42051	6.79853	6.83294	2.55662	3.40869	3.57748	6.42051	6.79853	6.83294
4.97587	3.51065	1.96792	6.72182	6.29974	6.84547	2.70885	3.46389	3.57982	6.72182	6.29974	6.84547
3.99022	3.12378	1.96898	6.64623	7.74681	6.85697	2.64527	3.47496	3.58039	6.64623	7.74681	6.85697
4.02599	1.29174	1.97199	6.30878	7.04269	6.85902	2.72347	3.54688	3.58339	6.30878	7.04269	6.85902
0.884255	1.82691	1.97199	6.55324	6.36755	6.86215	3.32709	3.32784	3.58501	6.55324	6.36755	6.86215
1.82562	3.01963	1.97257	6.30696	6.95315	6.87418	3.06787	3.34707	3.587	6.30696	6.95315	6.87418
2.75685	1.33993	1.97273	6.74165	6.54848	6.88393	3.64459	3.48232	3.5871	6.74165	6.54848	6.88393
2.91275	2.06302	1.97317	6.08046	7.24193	6.90977	3.2635	3.11605	3.58816	6.08046	7.24193	6.90977
2.99515	2.24147	1.97383	6.16387	6.74014	6.9615	3.39839	3.48912	3.58816	6.16387	6.74014	6.9615
3.11482	1.96782	1.97521	6.83297	7.34593	7.00191	3.69492	4.20799	3.58816	6.83297	7.34593	7.00191
1.2582	2.10661	1.97535	6.23608	6.7621	7.04766	3.19778	3.88369	3.58862	6.23608	6.7621	7.04766
3.14407	3.42612	1.97576	6.91793	7.09743	7.0601	2.88557	3.7745	3.59205	6.91793	7.09743	7.0601
2.17978	1.63826	1.97799	5.03085	6.80518	7.1223	3.24106	3.91076	3.59241	5.03085	6.80518	7.1223
2.68216	1.06335	1.97845	6.46059	7.11977	7.1352	3.79571	3.52405	3.59371	6.46059	7.11977	7.1352
3.37859	1.92819	1.98055	5.96682	7.31761	7.1518	3.69976	3.93841	3.5969	5.96682	7.31761	7.1518
1.67592	3.31918	1.98133	5.98656	7.19986	7.16419	3.28299	4.01072	3.59744	5.98656	7.19986	7.16419
2.53809	-0.0167551	1.98259	7.25049	6.754	7.2135	2.67517	3.17312	3.59771	7.25049	6.754	7.2135
2.86012	2.20554	1.98472	7.44702	7.40553	7.22046	3.20217	3.4653	3.59783	7.44702	7.40553	7.22046
3.69844	1.94596	1.98479	7.52918	7.459	7.22081	3.38037	3.83897	3.59829	7.52918	7.459	7.22081
3.50879	2.74137	1.99057	7.27102	7.81004	7.27271	3.57792	3.86177	3.59956	7.27102	7.81004	7.27271
3.7288	1.98724	1.991	7.42855	7.78347	7.28978	4.05322	4.36333	3.59956	7.42855	7.78347	7.28978
3.84176	3.74643	1.99109	6.83225	7.56209	7.32552	2.65741	3.69187	3.60067	6.83225	7.56209	7.32552
2.68692	2.51854	1.9912	5.9307	7.37786	7.33554	3.07773	3.91521	3.60089	5.9307	7.37786	7.33554
3.20569	2.87504	1.99137	6.35894	6.96991	7.37825	3.72509	3.86064	3.6014	6.35894	6.96991	7.37825
2.50095	1.7603	1.99453	7.10047	7.67535	7.41287	2.71493	3.47496	3.60218	7.10047	7.67535	7.41287
2.07992	2.22118	1.99535	7.05021	8.0405	7.44404	3.62322	3.82998	3.60468	7.05021	8.0405	7.44404
5.38821	1.39278	1.99546	7.21023	7.55061	7.45119	3.50116	3.97126	3.60649	7.21023	7.55061	7.45119
3.22971	1.4922	1.99841	6.2286	7.2705	7.46648	2.78567	3.63441	3.60784	6.2286	7.2705	7.46648
1.97703	1.73439	2.00058	6.6316	7.73251	7.4776	2.72528	3.31797	3.60787	6.6316	7.73251	7.4776
2.23938	1.69881	2.00135	6.2031	7.18308	7.48625	3.83163	3.80988	3.60833	6.2031	7.18308	7.48625
4.13078	2.44474	2.00232	6.64147	7.36637	7.50925	3.03967	3.49708	3.61118	6.64147	7.36637	7.50925
2.52032	0.773479	2.00365	7.73373	7.53723	7.56264	3.44394	4.30767	3.61118	7.73373	7.53723	7.56264
5.32435	1.60364	2.00397	6.82468	7.63278	7.58085	3.02304	3.94821	3.61229	6.82468	7.63278	7.58085
0.805761	3.16423	2.00412	6.15951	7.69187	7.58194	3.47913	3.95478	3.61412	6.15951	7.69187	7.58194
2.34849	2.16529	2.00489	6.64692	7.85164	7.58224	3.3776	3.47106	3.61492	6.64692	7.85164	7.58224
1.86641	1.94804	2.00506	7.18425	8.08615	7.59573	2.23404	4.27411	3.61547	7.18425	8.08615	7.59573
3.08076	2.11641	2.00513	7.52739	6.76694	7.59921	2.93115	3.84983	3.61673	7.52739	6.76694	7.59921
1.12742	1.49201	2.00533	5.8814	7.4526	7.65589	3.11898	3.55021	3.61864	5.8814	7.4526	7.65589
4.28732	2.99496	2.00622	6.00155	7.56011	7.70885	3.35734	3.5263	3.61909	6.00155	7.56011	7.70885
2.90798	1.67644	2.00634	7.43179	7.76843	7.7671	3.41422	3.94408	3.61935	7.43179	7.76843	7.7671
3.07753	0.54672	2.00741	7.65582	8.28904	7.86068	3.6749	4.20505	3.61951	7.65582	8.28904	7.86068
4.65976	2.60779	2.00741	7.6547	7.62051	7.87469	3.40118	3.65045	3.62013	7.6547	7.62051	7.87469
2.06587	2.74033	2.00742	7.73544	7.88746	7.89969	3.69031	3.58511	3.62305	7.73544	7.88746	7.89969
3.51884	2.33127	2.0084	8.10354	8.17514	8.01775	3.43337	3.53831	3.62405	8.10354	8.17514	8.01775
3.11959	2.00888	2.00928	7.51602	7.80175	8.06488	3.66909	3.6953	3.62587	7.51602	7.80175	8.06488
2.50643	1.50098	2.01011	8.33998	8.11822	8.10953	3.13493	4.07985	3.62666	8.33998	8.11822	8.10953
-0.0541768	1.45434	2.01014	7.93924	7.98008	8.18163	3.3458	3.98632	3.62923	7.93924	7.98008	8.18163
1.84199	2.15143	2.01075	7.73631	8.36386	8.18279	2.94759	3.25099	3.63002	7.73631	8.36386	8.18279
1.5807	1.67748	2.01109	7.79451	8.36449	8.26456	3.62924	3.86157	3.6308	7.79451	8.36449	8.26456
4.81461	2.29628	2.01282	8.74847	8.01451	8.32018	3.5386	3.45287	3.63418	8.74847	8.01451	8.32018
6.04686	1.4524	2.01496	7.5457	8.62087	8.38782	3.22662	3.62404	3.63473	7.5457	8.62087	8.38782
4.1822	3.23275	2.01761	9.07339	8.10302	8.4144	2.32307	3.65515	3.6358	9.07339	8.10302	8.4144
2.0269	0.795978	2.02	8.47354	8.46912	8.47703	3.23367	3.82144	3.63605	8.47354	8.46912	8.47703
3.52493	2.90536	2.02152	8.17616	8.49991	8.48507	3.26801	3.58511	3.6365	8.17616	8.49991	8.48507
3.23811	3.7731	2.02195	7.8324	9.24026	8.50417	3.62272	3.11724	3.63676	7.8324	9.24026	8.50417
3.27343	2.80787	2.02405	7.71839	8.33964	8.53234	3.89476	3.82077	3.63897	7.71839	8.33964	8.53234
3.49812	2.39504	2.02517	7.59398	8.5739	8.5782	3.27206	3.51314	3.63972	7.59398	8.5739	8.5782
2.08901	1.46822	2.02581	8.54113	7.65705	8.63173	3.23211	3.88286	3.64039	8.54113	7.65705	8.63173
3.12626	1.8862	2.02822	7.2293	8.75582	8.64887	3.64326	4.03971	3.64173	7.2293	8.75582	8.64887
2.8501	0.830851	2.02901	8.09476	8.68845	8.7677	2.72299	3.9011	3.64329	8.09476	8.68845	8.7677
2.32054	2.41345	2.03026	7.45011	8.59504	8.92171	4.06338	4.05947	3.64397	7.45011	8.59504	8.92171
2.5939	0.664179	2.03063	7.92551	9.06254	8.97416	3.10558	3.82808	3.64529	7.92551	9.06254	8.97416
3.52889	2.83361	2.03178	8.65839	9.34017	9.04808	3.67576	3.757	3.64551	8.65839	9.34017	9.04808
1.53952	1.68037	2.03192	7.5815	8.87606	9.12276	3.2276	3.674	3.64652	7.5815	8.87606	9.12276
3.8188	2.13927	2.03324	8.00885	9.01077	9.15016	4.12285	3.65331	3.64711	8.00885	9.01077	9.15016
4.05724	2.2876	2.03469	8.90604	8.21165	9.17113	4.35452	3.68034	3.64762	8.90604	8.21165	9.17113
3.08356	-0.230887	2.03527	8.9546	9.34301	9.18746	2.92006	3.59363	3.64775	8.9546	9.34301	9.18746
2.20594	2.29411	2.03729	8.65103	10.0494	9.28718	3.55609	3.19727	3.6484	8.65103	10.0494	9.28718
1.62268	1.81837	2.03866	9.05745	9.67782	9.37519	2.89748	2.83858	3.6504	9.05745	9.67782	9.37519
1.90104	1.55358	2.0397	9.03721	9.64372	9.38684	2.66213	3.5902	3.6504	9.03721	9.64372	9.38684
2.8192	1.19497	2.04027	8.81062	9.80904	9.87541	3.86412	3.55417	3.65103	8.81062	9.80904	9.87541
3.57007	1.86284	2.04172	10.4382	10.2253	10.1098	3.55582	4.12137	3.65171	10.4382	10.2253	10.1098
3.40195	0.910782	2.04255	13.1928	10.4302	10.4659	3.20461	3.74485	3.65403	13.1928	10.4302	10.4659
3.87558	2.72829	2.04257	9.85909	11.1743	10.5519	2.78134	3.73523	3.65602	9.85909	11.1743	10.5519
2.3962	2.70599	2.0444	10.4601	10.8019	10.64	3.83361	3.57599	3.65887	10.4601	10.8019	10.64
4.32019	1.36732	2.04587	10.5543	11.1248	10.7518	3.76923	3.74351	3.66118	10.5543	11.1248	10.7518
4.17471	0.308271	2.04614	11.0015	10.8418	10.8553	3.82579	3.4938	3.66218	11.0015	10.8418	10.8553
3.66739	1.13392	2.04658	9.68902	10.8171	10.8691	3.15351	3.65079	3.66522	9.68902	10.8171	10.8691
3.47662	2.98849	2.04665	11.4036	11.2083	11.0459	3.05196	3.79457	3.66752	11.4036	11.2083	11.0459
2.18355	1.41681	2.04807	11.2866	11.3824	11.4279	3.75045	3.65567	3.66829	11.2866	11.3824	11.4279
4.82754	4.09821	2.04813	12.0904	11.341	11.5879	3.75094	3.67624	3.66861	12.0904	11.341	11.5879
3.41213	2.53159	2.04898	11.406	11.6716	11.6402	3.93638	3.49482	3.66897	11.406	11.6716	11.6402
-0.350904	1.41945	2.04929	10.9262	11.9559	11.7863	2.20115	2.95886	3.66897	10.9262	11.9559	11.7863
2.73287	2.05555	2.05039	12.4812	12.2547	12.1905	4.16495	4.14293	3.67026	12.4812	12.2547	12.1905
1.84557	0.923947	2.05086	12.593	12.193	12.3374	3.00804	4.03292	3.67093	12.593	12.193	12.3374
4.03416	3.58149	2.05596	12.0108	12.3015	12.3734	4.29081	4.23584	3.67331	12.0108	12.3015	12.3734
1.13937	1.16504	2.05722	12.2623	12.1861	12.4923	3.23409	3.96688	3.67544	12.2623	12.1861	12.4923
1.93398	3.03517	2.05748	12.0392	12.1472	12.5991	2.73232	3.52539	3.6777	12.0392	12.1472	12.5991
6.03912	1.0095	2.05805	12.649	12.9684	12.8753	3.3622	2.81731	3.67785	12.649	12.9684	12.8753
1.46211	1.86989	2.06174	12.9883	12.7447	12.9253	3.36092	2.79918	3.68188	12.9883	12.7447	12.9253
2.61076	2.65296	2.06245	12.4586	13.1243	12.9927	3.75143	4.21918	3.68188	12.4586	13.1243	12.9927
2.86682	1.65249	2.06286	12.7916	12.9403	13.1225	3.32733	3.85552	3.68321	12.7916	12.9403	13.1225
0.12911	1.82581	2.06517	12.8898	13.5021	13.3593	3.54873	3.45111	3.68406	12.8898	13.5021	13.3593
0.345463	1.74904	2.06732	13.4775	14.3827	14.2179	3.6661	4.01488	3.68459	13.4775	14.3827	14.2179
4.22237	2.39115	2.06856				2.89837	3.74909	3.68965	-2.17134	-2.61171	-2.15102
3.01426	1.58975	2.06875				3.1974	3.21557	3.6906	-2.17134	-2.61171	-2.15102
3.27262	3.09831	2.07158				3.6524	4.06429	3.69159	-2.17134	-2.61171	-2.15102
3.37186	0.675258	2.07175				3.51504	3.22727	3.69234	-2.17134	-2.61171	-2.15102
3.4234	2.44615	2.07175				3.63742	4.15714	3.6948	-2.17134	-2.61171	-2.15102
2.10048	2.00049	2.07203				3.22272	3.60059	3.69555	-2.17134	-2.61171	-2.15102
3.62031	0.811706	2.07297				2.90959	3.59177	3.69699	-2.17134	-2.61171	-2.15102
2.91926	1.7337	2.07455				3.72689	4.12804	3.69757	-2.17134	-2.61171	-2.15102
3.24839	2.22557	2.07472				2.86388	3.39966	3.70132	-2.17134	-2.61171	-2.15102
2.14916	2.13605	2.07529				2.76826	3.93176	3.70301	-2.17134	-2.61171	-2.15102
2.93949	2.34175	2.07573				2.86845	3.14706	3.70376	-2.17134	-2.61171	-2.15102
3.15012	3.60488	2.07795				2.88721	3.96035	3.70717	-2.17134	-2.61171	-2.15102
2.44388	1.38845	2.07814				2.60083	3.31048	3.70749	-2.17134	-2.61171	-2.15102
4.03399	2.79303	2.07942				3.26181	3.56983	3.70815	-2.17134	-2.61171	-2.15102
2.83698	1.38795	2.08062				3.07691	3.50329	3.71215	-2.17134	-2.61171	-2.15102
1.77264	2.2155	2.08081				2.32071	4.14847	3.71347	-2.17134	-2.61171	-2.15102
2.85322	1.24507	2.08117				1.99776	3.63636	3.71362	-2.17134	-2.61171	-2.15102
2.66068	1.81385	2.0813				3.4244	3.7682	3.71415	-2.17134	-2.61171	-2.15102
3.12683	3.04498	2.08235				3.80112	3.36543	3.71577	-2.17134	-2.61171	-2.15102
3.25289	3.26034	2.08361				4.07063	3.82925	3.72063	-2.17134	-2.61171	-2.15102
1.23727	2.24695	2.0837				4.11496	3.09258	3.72188	-2.17134	-2.61171	-2.15102
2.79184	2.50242	2.08419				2.72546	3.4056	3.72336	-2.17134	-2.61171	-2.15102
2.64216	1.86058	2.08649				3.30759	3.76113	3.72387	-2.0703	-2.61171	-2.15102
2.16756	2.55115	2.08685				3.81873	3.59157	3.72503	-2.0703	-2.61171	-2.15102
4.07831	2.39809	2.08712				3.03481	3.91631	3.72627	-2.0703	-2.61171	-2.15102
2.16357	1.75191	2.08724				3.03422	4.45664	3.72794	-2.0703	-2.61171	-2.15102
2.44774	1.91025	2.08735				3.60901	3.95728	3.72805	-2.0703	-2.61171	-2.15102
2.81241	1.57267	2.0874				3.72472	4.06777	3.73498	-2.0703	-2.61171	-2.15102
3.13714	3.54337	2.08885				4.13635	4.11052	3.73526	-2.0703	-2.61171	-2.15102
2.53812	1.00291	2.09086				3.77919	3.78803	3.7354	-2.0703	-2.61171	-2.15102
3.96745	2.40685	2.09188				3.30391	3.7922	3.73549	-2.0703	-2.61171	-2.15102
2.51373	1.1148	2.09338				3.26007	4.42457	3.73549	-2.0703	-2.61171	-2.15102
2.23211	2.63637	2.09438				3.86367	3.91285	3.73911	-2.0703	-2.61171	-2.15102
1.8386	-0.161761	2.09473				3.58415	4.12942	3.74098	-2.0703	-2.61171	-2.15102
4.3104	2.15548	2.0948				3.32443	3.89738	3.74152	-2.0703	-2.61171	-2.15102
3.39017	2.45011	2.0948				2.74574	3.6668	3.74568	-2.0703	-2.61171	-2.15102
1.63775	2.10388	2.09502				3.09021	4.02594	3.75403	-2.0703	-2.61171	-2.15102
2.86097	2.0153	2.09512				3.15425	3.94094	3.75616	-2.0703	-2.61171	-2.15102
3.9007	3.02252	2.09518				4.35363	3.69946	3.7571	-2.0703	-2.61171	-2.15102
2.99549	2.97949	2.09543				2.46785	3.89688	3.7604	-2.0703	-2.61171	-2.15102
2.95691	2.42563	2.09543				3.27759	3.49072	3.76246	-2.0703	-2.61171	-2.15102
1.81894	1.12767	2.09618				2.45015	3.58671	3.76345	-2.0703	-2.61171	-2.15102
3.36715	2.22256	2.09629				3.27918	3.82693	3.76417	-2.0703	-2.61171	-2.15102
4.16506	2.1371	2.09745				3.86686	3.24911	3.7661	-2.0703	-2.61171	-2.15102
2.59398	1.84766	2.09771				3.76094	4.28327	3.76936	-2.0703	-2.61171	-2.15102
3.21696	1.65428	2.09814				3.19631	3.60341	3.7698	-2.0703	-2.61171	-2.15102
6.82414	1.61249	2.09976				3.5289	3.47009	3.7706	-2.0703	-2.61171	-2.15102
1.52529	1.67769	2.10099				3.98086	3.27063	3.77079	-2.0703	-2.61171	-2.15102
7.5215	2.99584	2.10117				3.60738	3.93459	3.77315	-2.0703	-2.61171	-2.15102
3.2298	2.61149	2.10274				2.69916	3.31258	3.77569	-2.0703	-2.61171	-2.15102
3.60897	2.0447	2.10544				4.13213	3.70591	3.77603	-2.0703	-2.61171	-2.15102
2.22643	2.31851	2.10647				2.68448	3.56934	3.77858	-2.0703	-2.61171	-2.15102
2.99245	2.09578	2.1083				2.43977	3.9989	3.7788	-2.0703	-2.61171	-2.15102
3.73767	1.87961	2.10967				3.3294	4.06126	3.78386	-2.0703	-2.61171	-2.15102
3.58247	2.12199	2.11038				3.37696	3.85114	3.78669	-2.0703	-2.61171	-2.15102
3.2451	1.38118	2.11113				4.17171	4.05937	3.78818	-2.0703	-2.61171	-2.15102
3.36534	2.36284	2.1116				3.12848	4.01589	3.78858	-2.0703	-2.61171	-2.15102
6.90555	2.3373	2.11295				3.16279	3.31484	3.78929	-2.0703	-2.61171	-2.15102
2.93573	1.93928	2.1151				3.51763	3.67459	3.78936	-2.04289	-2.61171	-2.15102
3.09559	1.24359	2.11588				3.08348	3.48176	3.79122	-2.04289	-2.61171	-2.15102
4.34855	3.21987	2.11672				3.10711	3.6533	3.7914	-2.04289	-2.61171	-2.15102
3.96965	1.55722	2.11742				2.7063	4.21941	3.79439	-2.04289	-2.61171	-2.15102
3.73376	1.22922	2.11843				3.71253	4.29695	3.79454	-2.04289	-2.61171	-2.15102
4.306	2.02791	2.11899				3.73287	4.23941	3.80158	-2.04289	-2.61171	-2.15102
4.94505	2.3861	2.11988				3.00101	3.77637	3.80179	-2.04289	-2.61171	-2.15102
4.59211	1.94929	2.1205				3.64773	3.94044	3.80341	-2.04289	-2.61171	-2.15102
2.58458	1.79801	2.12092				3.601	4.20602	3.81217	-2.04289	-2.61171	-2.15102
0.974525	0.922112	2.12132				3.83828	3.53714	3.819	-2.04289	-2.61171	-2.15102
2.83825	2.27905	2.12249				3.89956	4.24989	3.81969	-2.04289	-2.61171	-2.15102
0.941286	-0.116055	2.12452				3.33728	4.19704	3.82284	-2.04289	-2.61171	-2.15102
2.70223	1.20747	2.1265				5.36707	4.18296	3.82297	-2.04289	-2.61171	-2.15102
1.53914	0.469269	2.12719				3.5133	3.39188	3.82729	-2.04289	-2.61171	-2.15102
4.30719	2.50131	2.12919				2.9981	3.7831	3.82762	-2.04289	-2.61171	-2.15102
4.17959	2.50577	2.13048				3.48319	4.22342	3.83241	-2.04289	-2.61171	-2.15102
3.32272	2.69492	2.13161				3.65549	4.09341	3.8327	-2.04289	-2.61171	-2.15102
1.97692	1.91936	2.13503				4.0828	4.17372	3.8328	-2.04289	-2.61171	-2.15102
2.11279	1.7062	2.13611				3.85875	3.94418	3.83767	-2.04289	-2.61171	-2.15102
3.64681	3.0057	2.13658				4.07358	3.61491	3.83783	-2.04289	-2.61171	-2.15102
1.71755	1.04865	2.1381				3.52947	4.17198	3.83893	-2.04289	-2.61171	-2.15102
3.27505	1.80988	2.13983				3.05633	4.12727	3.84224	-2.04289	-2.61171	-2.15102
1.98413	2.06242	2.13988				2.76291	3.5224	3.84298	-2.04289	-2.61171	-2.15102
4.67295	3.16432	2.14105				3.70172	3.77549	3.8434	-2.04289	-2.61171	-2.15102
3.21391	2.7692	2.14258				2.86909	3.13881	3.84346	-2.04289	-2.61171	-2.15102
2.55945	2.31183	2.14306				3.12161	3.80016	3.84358	-2.04289	-2.61171	-2.15102
2.9624	2.0125	2.14434				3.94221	3.64772	3.84405	-2.04289	-2.61171	-2.15102
3.31986	2.04413	2.14434				1.69678	3.7451	3.84609	-2.04289	-2.61171	-2.15102
4.71016	2.57234	2.14526				3.55523	4.09328	3.84696	-2.04289	-2.61171	-2.15102
2.32931	2.1797	2.14568				3.32578	3.88774	3.85013	-1.17134	-2.61171	-2.15102
2.35704	2.33171	2.14591				2.72472	3.46817	3.85092	-1.17134	-2.61171	-2.15102
0.60271	1.37787	2.14733				3.8208	4.01704	3.85335	-1.17134	-2.61171	-2.15102
3.41193	2.4826	2.14771				3.8189	4.16284	3.85697	-1.17134	-2.61171	-2.15102
3.21127	3.18503	2.14895				3.4657	3.85208	3.86004	-1.17134	-2.61171	-2.15102
3.44013	2.21976	2.14949				3.80658	3.71865	3.86011	-1.17134	-2.61171	-2.15102
3.44055	0.599508	2.15027				3.22836	3.4101	3.86143	-1.17134	-2.61171	-2.15102
2.56484	2.50146	2.15091				2.88297	3.87509	3.86415	-1.17134	-2.61171	-2.15102
4.61204	3.01352	2.15171				1.80145	4.86426	3.86565	-1.17134	-2.61171	-2.15102
4.36624	0.808836	2.15235				4.02875	4.3337	3.86765	-1.17134	-2.61171	-2.15102
3.16842	1.82294	2.15458				4.22676	3.87272	3.86803	-1.17134	-2.61171	-2.15102
2.24315	2.36526	2.15529				4.01385	4.09347	3.86861	-1.17134	-2.61171	-2.15102
3.90628	2.58141	2.15774				4.24825	3.46385	3.86996	-1.17134	-2.61171	-2.15102
3.69888	3.02202	2.1587				3.81169	3.76334	3.87049	-1.11994	-2.61171	-2.15102
2.74849	2.185	2.162				3.34546	3.85445	3.87419	-1.11994	-2.61171	-2.15102
2.2131	0.827231	2.16292				4.00038	3.88675	3.87473	-1.11994	-2.61171	-2.15102
4.78459	1.52717	2.16392				3.81753	4.35094	3.87764	-1.11994	-2.61171	-2.15102
4.72705	1.50762	2.16401				2.25072	3.3827	3.87771	-1.11994	-2.61171	-2.15102
0.0529275	2.35716	2.16401				3.79588	3.74507	3.87835	-1.11994	-2.61171	-2.15102
3.67063	2.01261	2.16762				3.78845	3.86751	3.87929	-1.11994	-2.61171	-2.15102
1.80274	2.38598	2.16875				3.89355	4.11514	3.88106	-1.11994	-2.61171	-2.15102
3.46692	2.09032	2.16906				2.43427	3.38171	3.88191	-1.11994	-2.61171	-2.15102
6.03614	4.06291	2.16943				3.73264	4.02887	3.88203	-1.10569	-2.61171	-2.15102
1.77758	1.44528	2.17237				4.32542	3.7434	3.88357	-1.10569	-2.61171	-2.15102
1.68946	0.811706	2.17282				4.4317	4.20143	3.88488	-1.10569	-2.61171	-2.15102
2.68691	1.28639	2.17334				3.20065	3.83898	3.88492	-1.10569	-2.61171	-2.15102
3.25664	0.376795	2.17398				1.10943	4.02358	3.88685	-1.10569	-2.61171	-2.15102
3.64058	2.21553	2.17402				3.08153	3.78456	3.89096	-1.10569	-2.61171	-2.15102
3.06931	1.33917	2.17586				3.27319	4.37272	3.89122	-1.10569	-2.61171	-2.15102
2.17484	1.7415	2.17657				3.63661	3.73691	3.89129	-1.10569	-2.61171	-2.15102
4.13076	2.68019	2.17849				4.13859	4.08882	3.89167	-1.10569	-2.61171	-2.15102
-0.319059	3.6026	2.1792				4.01861	4.13725	3.89167	-1.10569	-2.61171	-2.15102
2.34282	3.01011	2.18024				3.61024	3.57373	3.89242	-1.10569	-2.61171	-2.15102
2.33896	2.03157	2.18221				2.66842	3.75217	3.89423	-1.10569	-2.61171	-2.15102
2.5959	1.00265	2.18399				3.54902	3.6391	3.89794	-1.0703	-2.61171	-2.15102
2.69157	2.64714	2.1849				3.66592	3.29521	3.89847	-1.0703	-2.61171	-2.15102
0.957108	0.388291	2.18548				3.94178	3.8039	3.89859	-1.0703	-2.61171	-2.15102
3.19494	3.21802	2.18636				4.35369	4.15491	3.89945	-1.0703	-2.61171	-2.15102
3.61304	2.30204	2.18638				3.16392	3.9781	3.90072	-1.0703	-2.61171	-2.15102
2.12032	1.91079	2.1864				3.89626	3.49999	3.90157	-1.0703	-2.61171	-2.15102
3.70951	2.5721	2.18685				3.29446	4.29831	3.90157	-1.0703	-2.61171	-2.15102
2.97472	2.22078	2.18704				3.42999	4.38908	3.90305	-1.05653	-2.61171	-2.15102
2.54503	3.13881	2.18758				3.45818	3.68663	3.90694	-1.05653	-2.61171	-2.15102
3.31584	2.28414	2.18802				3.61215	3.64174	3.90702	-1.05653	-2.61171	-2.15102
3.3639	1.50113	2.18821				4.01966	4.00319	3.90777	-1.05653	-2.61171	-2.15102
2.43717	1.87218	2.18962				3.66766	3.48272	3.90811	-1.05653	-2.61171	-2.15102
-0.760103	1.04849	2.18981				3.91736	3.69495	3.91404	-1.05653	-2.61171	-2.15102
3.71195	2.51315	2.19042				3.61442	4.5314	3.91443	-1.05653	-2.61171	-2.15102
1.90435	1.736	2.19328				3.16113	3.63254	3.91987	-1.05653	-2.61171	-2.15102
4.59033	3.47424	2.19431				3.53349	4.03907	3.92186	-1.05653	-2.61171	-2.15102
2.93032	0.316451	2.19477				3.76213	3.73791	3.92202	-1.05653	-2.61171	-2.15102
2.40177	2.35919	2.19594				3.62755	3.65674	3.92275	-1.05653	-2.61171	-2.15102
4.98509	1.94529	2.19605				3.16796	3.73072	3.92306	-1.05653	-2.61171	-2.15102
3.59884	1.9542	2.19614				2.86255	4.03689	3.92339	-1.04289	-2.61171	-2.15102
2.50436	1.51593	2.19791				3.81216	4.03998	3.92952	-1.04289	-2.61171	-2.15102
2.65587	2.2796	2.198				3.19959	4.44666	3.92952	-1.04289	-2.61171	-2.15102
2.18309	1.02514	2.19827				3.10617	4.09249	3.93071	-1.04289	-2.61171	-2.15102
3.61188	2.93461	2.20075				3.37312	4.30602	3.93224	-1.04289	-2.61171	-2.15102
1.14153	2.15768	2.20186				3.26076	4.0262	3.93308	-0.586376	-2.61171	-2.15102
3.04629	2.5216	2.20186				4.13479	4.10799	3.93347	-0.551905	-2.61171	-2.15102
3.69181	3.22723	2.20351				3.6496	3.63682	3.93391	-0.551905	-2.61171	-2.15102
3.46979	1.12451	2.20504				3.0259	4.5363	3.93415	-0.551905	-2.61171	-2.15102
3.57937	3.29588	2.20598				4.03684	4.50807	3.93535	-0.551905	-2.61171	-2.15102
1.62663	1.40953	2.20628				3.1291	3.49084	3.93606	-0.542277	-2.61171	-2.15102
4.60095	1.39609	2.20711				4.07145	3.68523	3.93919	-0.542277	-2.61171	-2.15102
3.64772	3.12985	2.20732				3.61306	3.8023	3.94321	-0.518239	-2.61171	-2.15102
4.70089	0.57736	2.20913				4.00824	4.31805	3.94374	-0.518239	-2.61171	-2.15102
5.58863	1.92988	2.21003				3.2312	3.88662	3.94384	-0.518239	-2.61171	-2.15102
2.84429	2.62651	2.21172				4.02328	4.2966	3.94744	-0.518239	-2.61171	-2.15102
2.79792	2.17628	2.21334				3.35101	3.98113	3.9515	-0.508832	-2.61171	-2.15102
3.27246	2.20012	2.21381				3.30212	4.18553	3.95351	-0.508832	-2.61171	-2.15102
1.16326	1.81256	2.21464				3.70844	3.95072	3.95357	-0.508832	-2.61171	-2.15102
2.88804	0.885112	2.21469				3.95506	4.03444	3.95497	-0.508832	-2.61171	-2.15102
0.348345	0.142206	2.21478				3.73637	4.26892	3.95552	-0.508832	-2.61171	-2.15102
2.92785	1.84219	2.21479				2.50931	3.78961	3.95732	-0.508832	-2.61171	-2.15102
4.1165	2.5294	2.21508				4.19302	4.64952	3.95874	-0.508832	-2.61171	-2.15102
2.97045	2.57318	2.21718				3.81749	3.79401	3.96535	-0.499487	-2.61171	-2.15102
3.17672	3.02145	2.21743				3.60682	4.07745	3.96559	-0.499487	-2.61171	-2.15102
4.44915	2.14792	2.21753				3.8655	4.19525	3.98133	-0.48534	-2.61171	-2.15102
2.98563	2.31543	2.21753				4.23507	4.45929	3.98202	-0.476145	-2.61171	-2.15102
3.13118	1.99588	2.21786				3.44625	4.23922	3.98291	-0.476145	-2.61171	-2.15102
2.73148	2.29275	2.21962				3.94317	3.88107	3.98299	-0.476145	-2.61171	-2.15102
3.74726	2.87189	2.22026				3.48882	3.67579	3.98703	-0.45793	-2.61171	-2.15102
2.74719	2.88372	2.22041				3.39589	3.80283	3.98703	-0.145408	-2.61171	-2.15102
2.55143	1.87123	2.22124				4.8616	4.07367	3.98722	-0.145408	-2.61171	-2.15102
1.56972	1.04408	2.22212				3.30555	3.97629	3.98788	-0.138139	-2.61171	-2.15102
3.83208	2.76806	2.22229				4.20471	3.85398	3.98794	-0.119936	-2.61171	-2.15102
3.61575	3.09776	2.22278				3.47962	4.05956	3.988	-0.0949058	-2.61171	-2.15102
4.73514	2.9648	2.22315				4.09635	4.39343	3.9921	0.197614	-2.61171	-2.15102
4.35191	2.35626	2.22375				3.63205	3.89814	3.99362	0.217734	-2.61171	-2.15102
2.84209	1.94454	2.2238				3.15054	3.57749	3.99836	0.223388	-2.61171	-2.15102
4.79306	2.25147	2.22497				2.16924	3.4125	3.99936	0.237576	-2.61171	-2.15102
4.2183	2.39649	2.22562				4.00711	4.02747	4.00181	0.465027	-2.61171	-2.15102
2.64084	2.47531	2.22621				4.05056	3.97048	4.00861	0.486472	-2.61171	-2.15102
2.64793	1.54034	2.22643				3.42906	3.98725	4.009	0.491168	-2.61171	-2.15102
2.9218	1.9991	2.22904				4.65952	4.45767	4.00984	0.500513	-2.61171	-2.15102
3.54393	2.68279	2.22958				4.09019	4.01617	4.01075	0.684293	-2.61171	-2.15102
4.25482	1.46611	2.23047				4.25609	3.99898	4.01129	0.727031	-2.61171	-2.15102
2.01143	0.473301	2.23366				3.49794	3.49961	4.01279	0.934786	-2.61171	-2.15102
2.92699	2.2257	2.23608				3.33106	3.00282	4.01459	1.05876	-2.61171	-2.15102
2.57002	3.0399	2.23753				3.35832	4.14225	4.01908	1.08089	-2.61171	-2.15102
2.96095	1.41916	2.23762				2.59974	4.3073	4.02147	1.09492	-2.61171	-2.15102
3.95007	2.11413	2.2389				3.90438	4.2564	4.02256	1.25017	-2.61171	-2.15102
2.35118	2.03569	2.24195				2.27263	3.53323	4.02387	1.36348	-2.61171	-2.15102
2.74286	2.24979	2.24237				3.37406	4.04667	4.0241	1.91294	-2.61171	-2.15102
4.35694	2.18403	2.24282				3.70259	4.01108	4.0247	3.49027	-2.61171	-2.15102
2.62933	1.97854	2.24484				3.74005	3.93248	4.02841	-2.17134	-2.12764	-2.15102
3.16726	1.98967	2.2453				3.28742	3.77699	4.03108	-2.17134	-2.12764	-2.15102
3.79519	1.84646	2.24625				2.93418	3.85962	4.03176	-2.17134	-2.12764	-2.15102
3.39968	2.15037	2.24634				3.91641	4.60181	4.03176	-2.17134	-2.12764	-2.15102
3.00442	2.57548	2.24646				3.33106	3.99581	4.03412	-2.17134	-2.12764	-2.15102
4.56925	1.86143	2.24743				4.3475	4.63413	4.03427	-2.17134	-2.12764	-2.15102
1.88591	2.84921	2.24952				4.25355	3.76915	4.03592	-2.17134	-2.12764	-2.15102
3.31058	2.79679	2.24959				3.82553	3.89046	4.03608	-2.17134	-2.12764	-2.15102
3.79579	2.81122	2.25032				4.4413	4.34452	4.03635	-2.17134	-2.12764	-2.15102
6.05378	2.45536	2.25131				3.6658	4.08759	4.03845	-2.17134	-2.12764	-2.15102
3.79395	3.50417	2.2514				3.11093	4.26388	4.04434	-2.17134	-2.12764	-2.15102
4.17608	2.90183	2.25445				3.35608	3.96734	4.04511	-2.17134	-2.12764	-2.15102
2.7919	1.47473	2.25532				3.61404	4.02017	4.04513	-2.17134	-2.12764	-2.15102
2.41785	1.64347	2.25705				4.05422	3.7855	4.04898	-2.17134	-2.12764	-2.15102
4.2693	2.39571	2.25816				2.43827	4.0865	4.04917	-2.17134	-2.12764	-2.15102
4.99494	3.26057	2.26018				3.40995	4.21073	4.04921	-2.17134	-2.12764	-2.15102
3.91478	3.53202	2.26024				4.2049	4.53217	4.04957	-2.17134	-2.12764	-2.15102
3.35136	2.98927	2.26027				3.20351	4.40658	4.05207	-2.17134	-2.12764	-2.15102
3.98765	1.55703	2.2609				2.60018	4.67612	4.05343	-2.17134	-2.12764	-2.15102
3.9747	2.8307	2.26113				3.12269	4.53821	4.05352	-2.17134	-2.12764	-2.15102
1.98859	0.931251	2.26138				3.39964	3.96227	4.05383	-2.17134	-2.12764	-2.15102
5.22286	2.97252	2.26259				3.57049	4.42212	4.05567	-2.0703	-2.12764	-2.15102
2.66344	2.52738	2.26426				3.68773	4.26536	4.05815	-2.0703	-2.12764	-2.15102
4.26831	2.39847	2.2644				3.66202	3.42199	4.05839	-2.0703	-2.12764	-2.15102
3.36088	3.01695	2.26565				3.97538	4.25327	4.05907	-2.0703	-2.12764	-2.15102
5.19042	2.24999	2.26622				4.27976	4.33059	4.05966	-2.0703	-2.12764	-2.15102
0.655323	1.76489	2.26821				4.79966	4.37962	4.06704	-2.0703	-2.12764	-2.15102
4.81846	3.59512	2.26881				3.86071	4.02931	4.07061	-2.0703	-2.12764	-2.15102
2.50486	1.31712	2.27157				4.61834	4.32858	4.0725	-2.0703	-2.12764	-2.15102
2.89594	2.49306	2.273				3.89777	4.01663	4.07457	-2.0703	-2.12764	-2.15102
2.65823	1.13171	2.275				4.38057	4.12796	4.07539	-2.0703	-2.12764	-2.15102
3.23498	2.86446	2.27578				3.585	4.44269	4.07572	-2.0703	-2.12764	-2.15102
2.31023	2.66755	2.28038				3.27923	4.19838	4.0768	-2.0703	-2.12764	-2.15102
1.74116	3.35766	2.28079				3.66842	3.3886	4.07745	-2.0703	-2.12764	-2.15102
3.333	3.32842	2.28089				3.38859	4.34264	4.08319	-2.0703	-2.12764	-2.15102
3.60285	2.07205	2.28165				3.50122	4.28001	4.08319	-2.0703	-2.12764	-2.15102
2.43495	1.04413	2.28182				3.03684	4.28825	4.08979	-2.0703	-2.12764	-2.15102
4.62626	3.18594	2.28278				3.55694	4.78642	4.09014	-2.0703	-2.12764	-2.15102
3.97495	2.74196	2.28341				4.19251	4.02085	4.09125	-2.0703	-2.12764	-2.15102
3.87777	2.24148	2.28536				3.70526	4.09521	4.09265	-2.0703	-2.12764	-2.15102
1.89707	0.998301	2.28741				3.9617	4.22327	4.09379	-2.0703	-2.12764	-2.15102
4.09513	2.87781	2.29158				3.65585	4.38015	4.09696	-2.0703	-2.12764	-2.15102
3.58579	2.384	2.29347				3.7607	3.80567	4.09926	-2.0703	-2.12764	-2.15102
4.00671	3.43604	2.29436				4.11744	4.40989	4.10013	-2.0703	-2.12764	-2.15102
2.46042	0.129012	2.29493				2.69388	3.5442	4.10017	-2.0703	-2.12764	-2.15102
3.85104	2.65885	2.29589				3.59782	3.95112	4.10279	-2.0703	-2.12764	-2.15102
3.17358	2.47913	2.29606				4.15723	3.95748	4.10651	-2.0703	-2.12764	-2.15102
2.0889	2.71993	2.29748				4.13967	4.37726	4.10965	-2.0703	-2.12764	-2.15102
4.48463	2.84889	2.29843				3.13189	3.99233	4.11044	-2.0703	-2.12764	-2.15102
5.61541	1.62327	2.29903				4.2013	4.1041	4.11839	-2.0703	-2.12764	-2.15102
3.5963	2.53521	2.30093				3.30626	4.33177	4.11862	-2.0703	-2.12764	-2.15102
2.72703	2.15253	2.30156				3.96976	4.19133	4.12049	-2.0703	-2.12764	-2.15102
3.99215	2.73775	2.30177				3.95939	4.42687	4.12101	-2.0703	-2.12764	-2.15102
2.64919	2.49946	2.30239				3.81003	4.17834	4.12308	-2.04289	-2.12764	-2.15102
4.08828	1.53755	2.30369				2.5547	3.9143	4.12319	-2.04289	-2.12764	-2.15102
5.27757	2.08325	2.3049				3.55187	4.17114	4.12374	-2.04289	-2.12764	-2.15102
2.84198	2.24484	2.30682				3.40184	4.03052	4.12413	-2.04289	-2.12764	-2.15102
3.84063	2.58736	2.30725				3.8614	4.43137	4.12839	-2.04289	-2.12764	-2.15102
4.58282	0.985724	2.30869				3.49471	4.09783	4.13117	-2.04289	-2.12764	-2.15102
2.58956	3.24489	2.31029				3.34481	4.46247	4.13499	-2.04289	-2.12764	-2.15102
3.45537	3.01218	2.31218				4.33004	4.50098	4.13516	-2.04289	-2.12764	-2.15102
1.98476	1.95823	2.31383				4.16918	4.24949	4.13918	-2.04289	-2.12764	-2.15102
4.32632	2.09715	2.31445				3.70985	4.2113	4.14592	-2.04289	-2.12764	-2.15102
2.70119	2.50762	2.31445				3.86645	4.00958	4.14685	-2.04289	-2.12764	-2.15102
7.21174	1.56535	2.31586				2.61315	4.06314	4.1477	-2.04289	-2.12764	-2.15102
3.27955	2.32139	2.31609				3.02913	3.45247	4.14828	-2.04289	-2.12764	-2.15102
3.86002	3.07797	2.31641				3.22028	4.0943	4.149	-2.04289	-2.12764	-2.15102
2.18491	1.00503	2.31931				3.76851	4.39046	4.14983	-2.04289	-2.12764	-2.15102
1.53297	1.30343	2.31966				4.36111	4.26817	4.15062	-2.04289	-2.12764	-2.15102
2.63641	2.13179	2.32257				3.71794	4.11776	4.15117	-2.04289	-2.12764	-2.15102
1.33283	3.27122	2.32267				3.42228	4.21435	4.15265	-2.04289	-2.12764	-2.15102
2.43135	2.1283	2.32341				2.86755	4.08037	4.15586	-2.04289	-2.12764	-2.15102
3.74156	2.79817	2.32402				2.72833	4.44446	4.15596	-2.04289	-2.12764	-2.15102
2.56355	2.3318	2.32486				3.86388	3.80914	4.15624	-2.04289	-2.12764	-2.15102
6.92492	1.73325	2.32493				4.08104	4.61224	4.15641	-1.17134	-2.12764	-2.15102
1.20189	1.48751	2.32501				4.95428	5.2492	4.15682	-1.17134	-2.12764	-2.15102
3.61869	3.03946	2.32539				4.01381	4.31034	4.15769	-1.17134	-2.12764	-2.15102
2.78956	2.36221	2.32591				3.69842	4.36955	4.16399	-1.17134	-2.12764	-2.15102
2.15077	2.19613	2.32899				4.67294	4.7797	4.16587	-1.17134	-2.12764	-2.15102
1.79602	2.39824	2.33113				3.73886	4.61626	4.16734	-1.17134	-2.12764	-2.15102
3.14862	2.08793	2.33158				3.36769	3.61916	4.16934	-1.11994	-2.12764	-2.15102
5.27793	1.70157	2.33363				4.24732	4.29305	4.17186	-1.11994	-2.12764	-2.15102
2.77921	2.03268	2.33433				4.1767	4.18516	4.17209	-1.11994	-2.12764	-2.15102
3.5059	1.93814	2.33497				3.88223	3.82629	4.17258	-1.11994	-2.12764	-2.15102
3.16233	1.60749	2.33792				4.2532	4.24013	4.17528	-1.11994	-2.12764	-2.15102
0.942308	1.69164	2.34006				2.59883	3.397	4.18306	-1.10569	-2.12764	-2.15102
4.91307	2.98831	2.34114				4.23254	4.00757	4.18537	-1.10569	-2.12764	-2.15102
2.08348	2.61674	2.34228				4.21613	4.34653	4.18644	-1.10569	-2.12764	-2.15102
3.70208	2.39331	2.34359				4.30248	4.36248	4.18811	-1.10569	-2.12764	-2.15102
1.10084	1.56503	2.34397				4.04683	4.70902	4.18857	-1.10569	-2.12764	-2.15102
4.01031	1.9581	2.34411				4.52321	4.70321	4.19096	-1.10569	-2.12764	-2.15102
3.13352	1.92528	2.34451				4.1416	4.50789	4.19208	-1.10569	-2.12764	-2.15102
6.81042	2.66984	2.34511				3.49058	3.49748	4.20537	-1.0703	-2.12764	-2.15102
5.21961	3.89585	2.34517				3.42001	3.92499	4.20867	-1.0703	-2.12764	-2.15102
4.09785	2.95324	2.34589				3.4657	4.62906	4.21475	-1.0703	-2.12764	-2.15102
3.3384	1.96319	2.34694				3.86505	4.62627	4.2158	-1.0703	-2.12764	-2.15102
3.63677	2.11886	2.34809				4.04885	4.71358	4.21596	-1.0703	-2.12764	-2.15102
3.49691	1.9362	2.34835				4.334	4.30995	4.21789	-1.0703	-2.12764	-2.15102
3.56536	2.34143	2.3495				4.67655	4.59268	4.21819	-1.05653	-2.12764	-2.15102
2.96497	1.7337	2.35008				3.78049	4.19001	4.21924	-1.05653	-2.12764	-2.15102
3.4448	2.86816	2.35191				3.80555	4.06857	4.22459	-1.05653	-2.12764	-2.15102
3.19131	2.62348	2.35228				4.42586	4.16712	4.22499	-1.05653	-2.12764	-2.15102
2.57536	2.58894	2.35258				4.1146	3.18186	4.22644	-1.05653	-2.12764	-2.15102
3.72576	2.50991	2.35329				4.47119	4.48234	4.22697	-1.04289	-2.12764	-2.15102
2.22285	3.29822	2.35344				4.32634	4.35969	4.2308	-1.04289	-2.12764	-2.15102
3.53537	2.55959	2.3543				4.0822	4.46301	4.2311	-1.04289	-2.12764	-2.15102
0.0869187	2.49188	2.35486				5.45443	4.86636	4.23329	-1.04289	-2.12764	-2.15102
3.3733	1.56828	2.36345				3.55269	4.4554	4.24077	-1.04289	-2.12764	-2.15102
-0.177097	0.898936	2.36506				3.57568	4.12268	4.24477	-1.04289	-2.12764	-2.15102
3.60707	2.13868	2.3652				3.42073	3.76465	4.248	-0.551905	-2.12764	-2.15102
5.73432	2.53889	2.36578				3.97558	4.20761	4.24886	-0.542277	-2.12764	-2.15102
2.96056	1.77475	2.36578				3.99886	4.31282	4.24923	-0.518239	-2.12764	-2.15102
4.53347	3.30127	2.36645				4.08673	3.66608	4.25213	-0.518239	-2.12764	-2.15102
3.66476	2.03433	2.36654				3.70659	4.05449	4.25499	-0.508832	-2.12764	-2.15102
2.98614	0.183839	2.36701				3.59974	4.99794	4.26065	-0.508832	-2.12764	-2.15102
2.55486	1.73184	2.36742				3.77649	4.71238	4.26176	-0.499487	-2.12764	-2.15102
4.83565	3.44024	2.36824				4.21832	4.39839	4.26715	-0.499487	-2.12764	-2.15102
2.71378	2.29766	2.37002				5.1916	5.41629	4.27024	-0.48534	-2.12764	-2.15102
2.13526	2.92763	2.37083				1.80835	5.14626	4.27164	-0.48534	-2.12764	-2.15102
2.77544	0.896824	2.37095				3.27279	3.99944	4.27447	-0.48534	-2.12764	-2.15102
1.84772	2.1452	2.37096				4.40698	4.58828	4.2747	-0.48534	-2.12764	-2.15102
3.03307	2.57999	2.37165				3.31294	4.54189	4.27815	-0.476145	-2.12764	-2.15102
2.98222	2.28883	2.37285				4.21867	4.33637	4.27831	-0.467009	-2.12764	-2.15102
3.79474	3.3565	2.37392				3.86237	4.31628	4.27859	-0.467009	-2.12764	-2.15102
4.94628	3.22063	2.37723				4.09029	4.25162	4.28436	-0.467009	-2.12764	-2.15102
3.85122	2.60702	2.38281				3.73136	4.46436	4.28592	-0.145408	-2.12764	-2.15102
2.76055	2.16363	2.38348				3.93928	4.57273	4.28705	-0.138139	-2.12764	-2.15102
2.8698	0.63298	2.38522				3.71263	4.65798	4.29182	-0.119936	-2.12764	-2.15102
2.73835	3.08693	2.38788				4.55426	4.49344	4.29197	-0.112793	-2.12764	-2.15102
3.50494	3.70099	2.38806				4.0592	4.57104	4.29281	-0.112793	-2.12764	-2.15102
5.14943	2.59337	2.38986				3.50587	4.56592	4.29406	-0.112793	-2.12764	-2.15102
3.57374	2.5425	2.39066				4.17151	3.83988	4.29406	-0.112793	-2.12764	-2.15102
2.72272	3.05465	2.39157				3.65403	4.53959	4.29422	-0.112793	-2.12764	-2.15102
3.93186	3.23183	2.39282				3.52082	4.14345	4.29691	-0.0949058	-2.12764	-2.15102
3.65559	2.05382	2.39348				4.15468	4.30415	4.29814	-0.0878858	-2.12764	-2.15102
3.1495	2.32514	2.39353				3.70858	4.4272	4.30115	-0.0808999	-2.12764	-2.15102
0.976046	2.35579	2.39359				3.95702	4.32765	4.30363	-0.0808999	-2.12764	-2.15102
3.0791	2.00124	2.39394				3.84797	4.14588	4.31104	-0.0565322	-2.12764	-2.15102
3.27866	2.56657	2.39428				4.79658	4.76455	4.31398	-0.0428922	-2.12764	-2.15102
2.54972	2.71	2.39513				3.54043	4.826	4.31404	0.191857	-2.12764	-2.15102
4.31817	2.08688	2.39573				4.16785	4.29042	4.31673	0.237576	-2.12764	-2.15102
3.10164	2.27038	2.39738				4.37026	4.42902	4.32171	0.237576	-2.12764	-2.15102
4.44076	2.2455	2.39779				4.66755	4.35137	4.32366	0.243154	-2.12764	-2.15102
2.28709	1.53562	2.39848				3.19415	4.47669	4.32379	0.491168	-2.12764	-2.15102
3.16072	2.24986	2.39873				3.72888	3.81837	4.32987	0.512231	-2.12764	-2.15102
3.23157	3.08114	2.39892				4.01329	4.34117	4.33186	0.516843	-2.12764	-2.15102
2.87736	1.57264	2.40023				5.46963	3.73974	4.33459	0.52843	-2.12764	-2.15102
2.63816	2.39916	2.4028				4.6431	4.84776	4.33518	0.712925	-2.12764	-2.15102
1.87928	3.92688	2.40321				3.72399	4.3903	4.34073	0.71694	-2.12764	-2.15102
2.31985	-0.15372	2.4038				4.09061	4.28855	4.3479	0.903241	-2.12764	-2.15102
4.26791	2.40889	2.40403				4.84046	4.34514	4.35295	0.924409	-2.12764	-2.15102
3.27337	2.24541	2.40425				4.13301	4.36621	4.35345	1.0249	-2.12764	-2.15102
3.76137	1.99467	2.4051				4.00598	4.63394	4.35737	1.06507	-2.12764	-2.15102
3.33247	3.16242	2.40535				4.11345	4.09729	4.35995	1.33613	-2.12764	-2.15102
3.77983	3.55838	2.40603				4.33665	4.75639	4.36018	1.36994	-2.12764	-2.15102
2.74936	3.06615	2.40706				4.19578	4.1842	4.36371	1.60847	-2.12764	-2.15102
3.31273	1.28099	2.40853				3.63555	4.64836	4.3664	1.82626	-2.12764	-2.15102
4.3104	3.67984	2.40984				4.46366	4.66477	4.36936	-2.17134	-2.06368	-2.15102
2.65843	2.79984	2.4102				2.9134	4.14284	4.37044	-2.17134	-2.06368	-2.15102
3.04318	2.42001	2.41102				3.46749	4.28686	4.37291	-2.17134	-2.06368	-2.15102
1.22995	2.53305	2.41251				4.0268	4.19937	4.37497	-2.17134	-2.06368	-2.15102
4.68025	2.19041	2.41443				4.40145	4.49129	4.3765	-2.17134	-2.06368	-2.15102
2.78901	1.72014	2.41471				3.757	4.54892	4.37712	-2.17134	-2.06368	-2.15102
3.8421	2.11288	2.41518				3.94055	4.32664	4.3784	-2.17134	-2.06368	-2.15102
3.83117	2.99238	2.41645				4.15855	4.44843	4.37913	-2.17134	-2.06368	-2.15102
2.77357	2.83482	2.41718				3.78485	4.38889	4.38333	-2.17134	-2.06368	-2.15102
-1.00192	1.43947	2.41929				3.5577	4.75249	4.39138	-2.17134	-2.06368	-2.15102
2.69213	1.55477	2.42008				4.62786	4.73236	4.39281	-2.17134	-2.06368	-2.15102
3.01104	3.26647	2.43066				4.66293	4.659	4.3959	-2.17134	-2.06368	-2.15102
2.63402	0.869625	2.43109				4.08082	4.71093	4.39608	-2.17134	-2.06368	-2.15102
4.64511	3.33192	2.43154				4.07115	4.36242	4.39647	-2.17134	-2.06368	-2.15102
4.35539	2.44749	2.43234				3.91675	4.40221	4.40064	-2.17134	-2.06368	-2.15102
3.38647	2.11739	2.43287				4.54235	4.3848	4.40123	-2.17134	-2.06368	-2.15102
2.53299	1.65053	2.43395				4.47	5.02954	4.40669	-2.17134	-2.06368	-2.15102
3.85831	2.28212	2.43603				3.41588	4.43552	4.40824	-2.17134	-2.06368	-2.15102
1.2582	2.468	2.43663				3.70295	3.97697	4.41577	-2.17134	-2.06368	-2.15102
2.77539	2.90207	2.43701				3.9329	4.56293	4.41598	-2.17134	-2.06368	-2.15102
1.76597	2.43493	2.4385				4.30273	4.89985	4.42087	-2.17134	-2.06368	-2.15102
3.13601	2.34364	2.43879				4.03363	4.17953	4.42167	-2.17134	-2.06368	-2.15102
4.04016	1.97341	2.44064				5.07342	4.89302	4.42171	-2.0703	-2.06368	-2.15102
3.60393	1.71259	2.44077				4.03008	3.94884	4.42404	-2.0703	-2.06368	-2.15102
5.47233	2.63236	2.44347				3.57503	4.29039	4.42431	-2.0703	-2.06368	-2.15102
4.1239	2.30631	2.44376				4.21219	4.59557	4.42722	-2.0703	-2.06368	-2.15102
2.61181	1.36083	2.44494				4.70025	4.66924	4.42981	-2.0703	-2.06368	-2.15102
3.17155	0.0686728	2.4451				4.22432	4.67188	4.43049	-2.0703	-2.06368	-2.15102
2.20389	2.40774	2.44616				3.781	4.7101	4.43106	-2.0703	-2.06368	-2.15102
5.04271	1.55269	2.44704				3.75025	4.71095	4.43224	-2.0703	-2.06368	-2.15102
4.64265	2.08533	2.44705				4.38682	4.62489	4.43273	-2.0703	-2.06368	-2.15102
2.79234	-1.32173	2.4471				4.02711	4.77772	4.43686	-2.0703	-2.06368	-2.15102
2.85	3.46699	2.4481				4.92855	4.71689	4.43712	-2.0703	-2.06368	-2.15102
3.85631	2.81939	2.44844				4.17509	4.38793	4.43788	-2.0703	-2.06368	-2.15102
3.57307	2.72884	2.45026				4.28319	4.59311	4.44102	-2.0703	-2.06368	-2.15102
6.2144	3.81899	2.45062				4.45728	4.97781	4.44262	-2.0703	-2.06368	-2.15102
2.61937	1.82492	2.45176				3.83849	4.12207	4.44528	-2.0703	-2.06368	-2.15102
3.52714	2.30397	2.45204				4.19829	3.67675	4.44662	-2.0703	-2.06368	-2.15102
7.47694	3.26991	2.45364				4.58306	4.50717	4.45	-2.0703	-2.06368	-2.15102
3.68321	2.23703	2.45549				4.09828	4.60942	4.45925	-2.0703	-2.06368	-2.15102
1.77045	1.94876	2.45618				4.35126	4.83841	4.46302	-2.0703	-2.06368	-2.15102
3.31646	2.8226	2.45676				4.44081	5.13724	4.46413	-2.0703	-2.06368	-2.15102
4.4302	2.73324	2.459				4.2103	4.23355	4.46699	-2.0703	-2.06368	-2.15102
3.24403	2.7687	2.45962				4.56895	4.35889	4.46825	-2.0703	-2.06368	-2.15102
3.62644	2.06058	2.46038				3.46263	4.38666	4.46999	-2.0703	-2.06368	-2.15102
3.5355	1.36045	2.4622				4.0223	4.34138	4.47232	-2.0703	-2.06368	-2.15102
4.86093	3.22803	2.46262				4.47135	4.09505	4.47392	-2.04289	-2.06368	-2.15102
3.39824	1.1028	2.46344				4.3166	4.58032	4.47526	-2.04289	-2.06368	-2.15102
1.76037	1.0578	2.464				3.92515	4.77019	4.47825	-2.04289	-2.06368	-2.15102
3.13322	2.85684	2.46509				4.80569	4.60519	4.47872	-2.04289	-2.06368	-2.15102
3.50003	1.88596	2.46653				3.54677	4.1341	4.47972	-2.04289	-2.06368	-2.15102
2.76647	2.10491	2.46681				5.36599	4.87471	4.48421	-2.04289	-2.06368	-2.15102
1.64159	1.88696	2.46716				3.4238	4.61528	4.48822	-2.04289	-2.06368	-2.15102
2.13544	1.04531	2.46743				4.31455	4.4826	4.49033	-2.04289	-2.06368	-2.15102
0.675923	1.61676	2.46873				3.97195	4.47259	4.49311	-2.04289	-2.06368	-2.15102
3.08295	1.755	2.46883				5.19522	4.96359	4.49355	-2.04289	-2.06368	-2.15102
3.77459	2.69643	2.4689				3.77326	4.40163	4.4952	-2.04289	-2.06368	-2.15102
4.18187	2.02252	2.46893				4.71162	4.66518	4.50079	-1.17134	-2.06368	-2.15102
4.04522	3.67647	2.46924				4.01963	4.46563	4.50384	-1.17134	-2.06368	-2.15102
7.28861	2.70973	2.46966				3.89178	5.0251	4.50745	-1.17134	-2.06368	-2.15102
2.86689	2.04163	2.47176				4.67927	4.37338	4.51165	-1.17134	-2.06368	-2.15102
3.99413	2.12595	2.47194				3.68477	4.55249	4.51562	-1.17134	-2.06368	-2.15102
3.82197	2.60739	2.47336				4.03092	4.57335	4.5166	-1.17134	-2.06368	-2.15102
5.04332	4.17167	2.47506				4.68851	4.67036	4.51815	-1.17134	-2.06368	-2.15102
5.53339	3.757	2.47853				3.79108	4.20119	4.52776	-1.11994	-2.06368	-2.15102
4.401	2.96093	2.47941				4.0787	4.47797	4.53113	-1.11994	-2.06368	-2.15102
3.1438	2.62326	2.48003				3.93189	4.82497	4.53221	-1.11994	-2.06368	-2.15102
3.87604	1.73953	2.48012				4.67084	4.73098	4.53933	-1.11994	-2.06368	-2.15102
[truncated: 37,157 more rows]

## Sheet: Fig2C
ED-SL			EI-SL
WT	enok1	enok2	WT	enok1	enok2
5.64329	-2.09702	0.633017	5.7742	4.27478	4.44189
5.00928	-2.06079	0.51371	4.81414	3.31631	3.57678
5.42753	-1.61171	-0.963463	7.43115	5.9334	6.33539
4.6739	-2.04144	0.532293	4.4626	2.96528	3.18528
3.88661	-2.61171	1.49471	6.61539	5.11857	5.27692
5.51015	-0.846735	0.446092	4.40968	2.91416	3.2717
5.85276	-0.453989	0.608793	5.50849	4.01318	4.2032
5.63382	-0.66282	0.30721	2.70223	1.20747	2.1265
5.68868	-0.499722	-0.0643334	4.27649	2.78389	3.14267
4.10633	-2.06368	-1.15102	6.01199	4.51962	5.0424
7.43696	1.29317	1.33739	-1.10106	-2.59283	-2.13214
4.03502	-2.06368	-0.438349	2.18764	0.695864	1.15656
4.71085	-1.34947	-0.982565	7.61578	6.12449	6.54493
6.58568	0.609064	1.4199	3.6403	2.15144	2.59264
4.99753	-0.833691	0.444778	4.19301	2.70429	3.00541
3.65382	-2.12764	0.852724	2.20902	0.721212	1.01109
3.70474	-2.05209	-2.13943	3.35107	1.86556	1.89775
3.62253	-2.06368	-0.814525	4.18762	2.70212	3.65932
7.21174	1.56535	2.31586	4.4465	2.9618	3.36178
6.92033	1.28172	0.935392	5.01698	3.53426	3.58024
5.05305	-0.585504	-0.805537	2.58385	1.10127	1.13084
5.3576	-0.257047	-1.93342	3.12495	1.64349	1.89026
2.99936	-2.61171	-0.982565	3.98319	2.50255	3.00542
4.97318	-0.566835	-2.07853	4.55396	3.07372	3.46536
2.92043	-2.61171	-2.15102	6.0338	4.55557	4.74003
7.98977	2.48337	3.08005	7.11968	5.6452	5.84453
4.69566	-0.772734	-0.908565	6.63391	5.16266	5.41785
4.8041	-0.660507	-0.937258	5.30959	3.83899	4.27845
10.2666	4.82227	5.41097	6.30822	4.83771	4.85013
3.83081	-1.61171	-2.15102	4.42432	2.95501	3.72776
5.57339	0.132091	1.25631	4.66321	3.19398	4.18339
4.25468	-1.12764	-0.982565	4.29627	2.82758	3.06261
6.60788	1.24092	1.48594	3.60707	2.13868	2.3652
4.31931	-1.04253	-0.581837	5.56042	4.0922	4.28612
4.8583	-0.499722	0.185475	1.57967	0.113038	1.44107
12.1515	6.84669	6.65503	3.27505	1.80988	2.13983
11.4244	6.13076	5.76157	4.85248	3.39081	3.50239
12.2849	6.99754	7.15265	3.58247	2.12199	2.11038
2.63571	-2.61171	-1.83174	4.47736	3.01976	4.05626
5.01694	-0.216797	1.52974	4.16354	2.70793	2.66944
6.82414	1.61249	2.09976	5.37827	3.92402	4.34494
6.92492	1.73325	2.32493	1.65474	0.200576	1.28131
4.7933	-0.387562	-0.266817	5.08728	3.63409	3.67438
10.2887	5.11226	5.02011	2.84984	1.39908	1.68507
10.7396	5.57854	5.50837	3.37859	1.92819	1.98055
11.1537	6.01017	5.6557	2.99358	1.54442	1.77865
4.90941	-0.215353	-0.319592	2.83698	1.38795	2.08062
6.28452	1.16884	0.222323	6.00274	4.5549	5.15579
11.0548	5.97851	5.62265	3.16322	1.71644	1.70737
3.60302	-1.46929	-2.0086	3.68321	2.23703	2.45549
4.36542	-0.686712	-0.235279	2.40161	0.955939	0.985066
2.91165	-2.12764	-0.963463	1.44937	0.00426264	1.2132
6.03912	1.0095	2.05805	2.65044	1.20596	1.80107
3.92211	-1.09531	-0.814525	7.21548	5.77274	6.18669
8.11133	3.12802	1.49482	4.55181	3.11082	3.64121
10.8961	5.92025	5.58083	3.87826	2.43738	2.53774
2.35055	-2.61171	-0.451597	4.05477	2.61508	2.91755
2.89706	-2.06368	-1.83174	3.37763	1.93938	2.90442
10.7705	5.83688	5.95334	1.31725	-0.119407	-0.164419
2.29986	-2.61171	-2.15102	6.66374	5.22765	5.41593
5.25537	0.348979	1.66061	6.25309	4.81742	5.01622
3.81097	-1.09531	-0.797511	4.02334	2.59252	2.9816
6.40009	1.49548	1.06797	0.894438	-0.535449	0.568882
5.81235	0.917019	0.581991	4.12614	2.69695	3.252
9.52453	4.63197	4.36546	3.62432	2.19868	2.78204
9.94333	5.0824	4.73086	3.64058	2.21553	2.17402
10.7991	5.93947	5.50409	5.14233	3.71758	4.04234
5.3434	0.489183	0.537792	3.01426	1.58975	2.06875
9.88796	5.0351	4.77038	5.06198	3.63758	3.84282
3.12501	-1.7241	-1.4282	5.17831	3.75424	4.24408
11.6093	6.7622	6.23778	5.443	4.01936	4.69225
5.20366	0.369274	0.808225	5.16838	3.74517	3.78143
12.5758	7.74156	7.64822	4.47897	3.05718	3.44022
11.8031	6.97014	6.95569	4.01772	2.5968	2.57495
11.3679	6.53782	6.45411	3.3011	1.88037	2.8324
3.73113	-1.09531	-1.83174	3.47599	2.05563	2.48571
4.60424	-0.199507	1.71953	6.92355	5.50528	5.5939
3.18762	-1.61171	-1.83174	2.16353	0.745427	1.64119
4.92354	0.134996	0.626748	2.75685	1.33993	1.97273
11.74	6.95215	6.98635	4.43119	3.01559	2.98057
5.84363	1.0591	0.34906	7.32949	5.91396	6.21142
11.3822	6.61438	6.11649	9.41547	8.00263	8.36587
2.2091	-2.5483	-2.08761	5.83296	4.4218	4.74629
4.29636	-0.451369	0.0598069	3.29075	1.8825	2.50744
11.3824	6.63733	6.45389	3.03878	1.63076	1.88156
12.0716	7.33016	7.44864	4.06139	2.65613	3.19876
11.5646	6.82453	6.09898	4.975	3.57029	3.50734
6.33527	1.60099	0.7075	5.19055	3.78696	3.92
3.3693	-1.34947	-0.963463	5.12828	3.72553	4.0017
3.86526	-0.846735	0.1039	7.67014	6.26823	6.18234
12.7734	8.06148	8.09037	2.68691	1.28639	2.17334
2.55847	-2.13175	-1.67106	5.72401	4.32361	4.74789
2.07143	-2.61171	-0.451597	6.48943	5.08971	5.08169
3.96968	-0.686712	-2.15102	2.51373	1.1148	2.09338
10.468	5.81806	5.45487	5.25613	3.8583	4.56784
10.4633	5.81555	6.23379	4.22071	2.82427	3.71144
5.40831	0.762507	-0.41655	4.66667	3.27191	4.16055
6.94486	2.30218	1.88061	2.18173	0.790438	0.732528
7.94017	3.30047	2.9529	2.43495	1.04413	2.28182
5.58292	0.961631	0.654649	1.76491	0.374617	0.519695
2.20737	-2.39914	-0.769998	5.68871	4.30065	5.10864
6.04686	1.4524	2.01496	4.29281	2.9059	3.13167
11.1432	6.55289	6.38574	2.2131	0.827231	2.16292
10.1996	5.61168	5.65029	3.86072	2.47489	2.60711
5.89028	1.30281	1.96291	1.841	0.457633	1.07925
10.1458	5.56424	5.44464	2.27361	0.89108	1.76852
7.28861	2.70973	2.46966	3.57054	2.18848	2.49212
5.97705	1.3985	1.46587	2.28854	0.90821	1.78869
10.5591	5.98596	5.79001	6.10916	4.72971	5.073
4.88507	0.313288	-1.83174	4.91434	3.53507	4.14344
4.37209	-0.199507	-2.15102	3.46692	2.09032	2.16906
6.90555	2.3373	2.11295	4.75693	3.3804	3.76729
11.8499	7.29385	7.36035	4.61445	3.23854	3.36673
7.35291	2.80547	3.24881	6.38659	5.01089	5.04583
2.97558	-1.5716	-0.305432	3.3384	1.96319	2.34694
1.92614	-2.61171	-2.15102	9.58406	8.21081	8.43191
5.69414	1.16476	-0.293361	4.73076	3.35771	3.66765
7.5215	2.99584	2.10117	2.22801	0.857007	1.22268
2.03632	-2.4804	-0.307036	4.2813	2.91146	3.24731
1.90324	-2.61171	-0.566054	8.36689	6.99735	7.55551
3.38637	-1.12764	-0.963463	4.76678	3.39763	3.93883
10.8184	6.34426	6.57925	5.62525	4.25857	4.65598
7.40431	2.93859	2.61198	6.75353	5.38978	5.60386
3.14679	-1.31183	-1.79751	8.32348	6.96142	7.04889
11.5928	7.14129	6.92602	4.34556	2.98443	3.46079
11.4727	7.03655	7.01398	1.22935	-0.130914	1.18128
10.9144	6.47849	6.23527	4.20524	2.84502	3.53101
10.9996	6.57293	6.33201	9.81248	8.45237	8.41156
1.89777	-2.52704	-2.06635	4.3666	3.00808	3.77369
2.50174	-1.92285	-0.690917	4.16781	2.81184	3.07015
4.37465	-0.0450933	-0.0541939	4.17159	2.81667	3.08506
2.82024	-1.58844	-0.940193	2.65951	1.30616	1.88379
11.1587	6.76316	6.53288	3.84349	2.49018	2.73737
3.72914	-0.66282	-0.831742	6.6195	5.26669	5.41825
2.77699	-1.61171	0.112927	6.07281	4.72019	4.9273
4.09599	-0.244008	-0.0989299	4.20635	2.85496	3.04463
10.5762	6.24809	6.52549	5.58984	4.23867	4.91935
10.8944	6.56959	7.19806	7.05255	5.70162	6.20764
3.88179	-0.413018	0.16287	2.36697	1.01873	1.21794
5.43781	1.1509	0.655578	3.16842	1.82294	2.15458
3.2944	-0.991581	0.790505	5.04758	3.70318	3.76089
4.43496	0.15063	0.0948163	2.87163	1.52852	1.94678
2.93829	-1.32766	-0.213474	4.60047	3.25768	3.18922
13.0738	8.81009	8.88053	4.96504	3.62323	4.19181
4.96506	0.718392	-1.79751	2.49912	1.15759	1.02027
8.08885	3.85387	3.06941	4.26836	2.9272	3.02013
3.67326	-0.54268	-0.0643334	5.62367	4.28271	4.3194
9.76242	5.55533	5.73586	4.69462	3.35369	3.6304
7.47694	3.26991	2.45364	4.61139	3.27097	3.69077
4.10786	-0.095305	1.00015	8.81094	7.47207	7.53966
5.25029	1.05028	3.25537	4.75171	3.41412	3.86775
2.1784	-2.01828	-0.236198	5.1248	3.78804	4.18468
3.8464	-0.342237	-0.956231	0.381586	-0.951295	1.08476
1.59066	-2.59429	-1.81433	2.19481	0.861937	1.3862
2.56397	-1.61171	-0.963463	6.12963	4.79864	4.8353
11.5181	7.35519	7.93677	5.26107	3.93109	3.99833
8.21126	4.04858	4.44395	3.08295	1.755	2.46883
2.8434	-1.31442	-0.200232	2.65961	1.33194	2.53779
6.36605	2.22021	1.33506	2.06192	0.736471	0.949304
6.81042	2.66984	2.34511	3.91577	2.5907	3.19034
5.08117	0.943819	1.9119	6.37137	5.04643	5.14736
3.61487	-0.521041	-0.566054	6.04522	4.7211	5.53999
11.4155	7.28375	7.47423	4.32796	3.00402	3.30479
2.00679	-2.12475	-0.960575	6.30912	4.98627	5.28013
11.3675	7.23827	7.02533	3.17114	1.8486	1.84244
4.70089	0.57736	2.20913	5.53844	4.21806	4.32382
2.82471	-1.29878	0.51014	2.91595	1.59701	1.54178
3.70668	-0.410926	1.77738	7.23697	5.91917	6.35336
4.68373	0.577227	-1.51521	2.7919	1.47473	2.25532
4.7502	0.644178	-0.310973	3.42695	2.11049	2.5589
10.0778	5.97323	6.63692	4.26443	2.94809	3.72552
4.03814	-0.0659519	0.806177	4.19147	2.87539	3.07383
6.12774	2.03882	1.51198	3.70806	2.39242	3.19262
4.26816	0.182823	0.396106	6.75718	5.44161	5.46378
4.45536	0.403628	1.30406	6.37848	5.06323	4.98227
3.19233	-0.846735	0.0174349	5.8353	4.52064	4.83134
8.26765	4.23465	3.61048	5.40829	4.09392	4.45424
5.12614	1.10842	0.215812	4.09056	2.77786	3.80152
3.29393	-0.718467	-0.861865	1.55911	0.247873	0.821159
1.8827	-2.12764	0.170912	3.61304	2.30204	2.18638
4.02854	0.0196375	-0.831742	4.30827	2.99936	2.87998
4.43016	0.421462	1.17185	3.70208	2.39331	2.34359
5.32131	1.32164	1.12031	2.45405	1.14722	1.86534
10.0852	6.08557	6.5043	4.99784	3.69175	4.21553
5.38821	1.39278	1.99546	3.73349	2.4278	2.89355
2.38329	-1.61171	0.660613	2.87736	1.57264	2.40023
5.61541	1.62327	2.29903	7.21736	5.91272	6.44943
6.77605	2.80675	2.76395	6.5316	5.22739	5.34277
9.61631	5.65232	5.01906	4.45274	3.14923	3.70215
4.1517	0.22349	0.567839	6.61815	5.31655	5.44427
9.15503	5.23021	5.17961	6.00757	4.70748	5.0957
4.99911	1.08662	0.322855	3.70833	2.40848	3.48481
2.30452	-1.60303	-1.78883	4.25531	2.95886	3.18525
7.71846	3.81971	2.95999	8.89501	7.59926	7.51185
1.82114	-2.06223	-1.8303	2.51409	1.21941	1.42308
11.7958	7.9263	7.72532	4.5063	3.21317	3.35544
4.17471	0.308271	2.04614	3.73571	2.44294	2.60489
10.1549	6.29404	6.58598	5.05625	3.76557	3.83516
4.18795	0.330347	0.306974	6.53332	5.24298	5.67687
4.98323	1.14387	1.6928	3.89821	2.60792	3.03431
1.22487	-2.61171	-2.15102	2.75891	1.46867	1.31931
4.73173	0.898465	-1.70978	5.65206	4.36193	4.6987
4.12437	0.313622	1.10448	4.67219	3.38262	3.90962
3.87527	0.0841035	0.422946	4.70392	3.41533	3.45333
4.05002	0.260698	1.63494	1.22769	-0.0606187	0.112927
12.0988	8.31163	8.26329	8.06846	6.7835	7.12256
4.16387	0.381046	0.86126	2.01083	0.726405	1.3103
2.48228	-1.29657	-1.74462	4.43267	3.14869	3.06656
10.4475	6.67316	6.70474	6.42822	5.14684	4.97242
2.26777	-1.50079	0.481731	2.31192	1.0329	0.896604
2.41703	-1.34947	-0.566054	4.38859	3.11117	3.70405
6.85477	3.09591	3.08656	4.82913	3.55279	3.95616
5.14151	1.38378	1.19156	3.31986	2.04413	2.14434
10.9786	7.22828	7.42411	2.61508	1.33949	1.48848
2.58467	-1.16142	-2.00062	1.27148	-0.00234041	0.185457
3.85775	0.123408	0.378322	2.16643	0.894055	1.13856
4.64889	0.915167	0.123374	6.73319	5.46144	5.74626
3.06517	-0.667969	0.419987	5.5738	4.30218	4.38577
10.4844	6.75434	7.22311	5.98264	4.71105	5.01285
5.32435	1.60364	2.00397	7.14495	5.87486	6.10773
10.0676	6.3487	5.55343	3.38647	2.11739	2.43287
11.6114	7.90237	7.81464	3.03272	1.76405	1.88446
1.10489	-2.60012	-0.970977	2.16121	0.893053	1.26152
2.72198	-0.976842	-0.283339	3.24081	1.97303	3.248
4.35784	0.660035	-1.83174	4.36381	3.09617	3.3403
2.60516	-1.09097	-0.230944	6.28319	5.01774	5.2209
1.09705	-2.59867	-0.801482	3.78632	2.52307	2.88825
2.12413	-1.56957	-0.656907	5.10402	3.84162	4.82518
3.95383	0.260698	1.2558	2.82407	1.56181	1.4078
11.8335	8.14719	8.28846	3.17746	1.91588	3.30188
3.78454	0.0998338	0.879801	3.85888	2.59758	2.58735
2.38486	-1.29878	0.459135	3.99389	2.73495	2.64452
4.79438	1.11207	0.760635	2.01428	0.756264	1.70328
3.9446	0.264109	0.726593	6.14017	4.88395	5.11939
3.4612	-0.216797	0.678964	3.94785	2.69209	2.51739
3.19048	-0.470757	-0.204591	5.10488	3.85062	3.66284
5.58863	1.92988	2.21003	3.68272	2.43068	2.8636
10.5646	6.90709	6.03725	4.21118	2.95929	3.4401
2.9045	-0.72644	0.973019	5.1509	3.89914	4.35426
4.21755	0.587494	0.774856	2.61181	1.36083	2.44494
4.50105	0.874496	0.998161	5.94481	4.69458	4.84263
5.20544	1.59314	0.81325	3.47778	2.22787	2.71586
2.7725	-0.832235	0.1184	4.34833	3.09886	3.48847
3.58598	-0.0177538	0.160933	6.52004	5.27064	5.47033
6.05378	2.45536	2.25131	3.39968	2.15037	2.24634
4.58282	0.985724	2.30869	9.26755	8.02215	8.24157
5.65937	2.07424	1.4771	5.10551	3.86099	4.11903
5.27793	1.70157	2.33363	3.85122	2.60702	2.38281
10.1458	6.5718	6.3552	5.31501	4.07127	4.0685
4.52743	0.964868	1.54757	4.07055	2.82907	2.6016
2.86069	-0.699188	0.291602	3.85192	2.61128	3.00835
4.36624	0.808836	2.15235	3.12626	1.8862	2.02822
4.21005	0.662804	0.150586	2.81241	1.57267	2.0874
3.57801	0.0401094	1.9272	4.85288	3.61357	3.95536
2.22198	-1.31183	-0.345557	2.33638	1.09739	2.54453
3.9597	0.427983	1.2677	5.53755	4.29865	4.44936
3.84811	0.327787	0.0415172	4.74608	3.50839	3.68942
4.48801	0.970371	2.69501	3.90755	2.6703	3.1392
3.05807	-0.453989	-0.963463	5.61684	4.38003	4.78047
10.8791	7.369	7.86137	4.00431	2.77017	3.08565
5.35056	1.85013	2.54531	4.08625	2.85219	3.09153
2.96323	-0.536898	-0.206766	3.9569	2.72328	2.931
5.04271	1.55269	2.44704	5.22428	3.99122	4.42863
5.02409	1.55121	1.90308	2.46371	1.23075	1.52986
7.58957	4.15094	4.20686	7.89162	6.65882	6.75968
3.50687	0.0689966	1.69588	3.43352	2.20076	2.90013
3.87011	0.447184	1.26138	5.89206	4.65985	5.01039
3.60682	0.194285	1.68886	2.90798	1.67644	2.00634
10.6571	7.24841	7.99624	2.96497	1.7337	2.35008
1.27087	-2.12764	-1.83174	2.28308	1.05201	0.832576
4.79045	1.40842	1.49209	2.0269	0.795978	2.02
4.93579	1.55644	-0.435353	4.51315	3.28294	3.51668
2.75984	-0.617389	0.593835	3.2043	1.9756	2.5606
11.8859	8.51055	8.06603	2.12149	0.893778	0.707534
4.17276	0.810752	1.3	7.62759	6.39992	6.2657
2.73406	-0.627729	0.620381	2.99578	1.76877	1.61949
8.96497	5.60772	4.83553	3.72596	2.49936	3.18042
2.21982	-1.12764	-0.831742	5.29947	4.07331	4.37131
2.67046	-0.673669	0.871146	4.24967	3.02468	2.80218
3.37852	0.0344289	1.73853	6.71164	5.48698	5.39213
3.65535	0.313593	-0.0114385	3.56536	2.34143	2.3495
5.64178	2.30152	3.49524	5.74266	4.51877	4.54767
2.16358	-1.17485	0.110288	0.97329	-0.250485	0.648878
5.81736	2.48395	3.02539	3.52714	2.30397	2.45204
3.7541	0.423381	0.54651	3.972	2.74923	3.2756
0.717582	-2.60303	-1.82306	3.60046	2.37796	3.14442
1.33731	-1.98206	-1.7159	5.601	4.37915	4.30843
8.0501	4.73358	5.14356	3.44013	2.21976	2.14949
1.18455	-2.12764	-0.963463	5.39123	4.17101	4.00164
9.995	6.68602	7.19855	7.71032	6.49066	6.47039
7.78002	4.47628	5.30978	5.03688	3.81731	4.21383
2.32522	-0.977218	0.7807	2.6037	1.38509	1.68248
3.73136	0.434337	-0.831742	4.35883	3.14102	3.28324
2.47966	-0.811383	-0.312353	6.41295	5.19581	5.26767
2.00182	-1.28524	-0.0533101	5.93424	4.71798	5.05759
10.8355	7.55952	8.28225	3.72576	2.50991	2.35329
5.55963	2.29456	2.82241	3.82197	2.60739	2.47336
2.41638	-0.846735	-0.223869	2.86682	1.65249	2.06286
2.32286	-0.939936	-1.6098	7.5022	6.28824	6.48222
4.65531	1.39373	1.83718	4.02627	2.81482	2.53797
3.71813	0.456905	1.68227	3.12843	1.91743	1.9055
4.78459	1.52717	2.16392	2.23165	1.02126	1.04793
1.21074	-2.0448	-1.81286	3.5612	2.35159	3.33021
4.85393	1.60946	1.22244	7.00029	5.79081	5.92934
2.5663	-0.673669	-0.332514	3.66616	2.45688	2.51024
3.43812	0.199765	0.68947	3.13352	1.92528	2.34451
2.79245	-0.444	1.17641	6.37249	5.16533	5.00035
4.58072	1.35599	2.65973	4.48258	3.27689	3.62095
3.64511	0.422773	-0.391432	3.00077	1.79509	1.57259
4.72705	1.50762	2.16401	4.25522	3.04974	3.29291
3.17629	-0.0413976	0.555642	3.74183	2.53663	2.6467
3.54142	0.323807	0.757559	5.49528	4.29049	4.70774
2.36671	-0.846735	0.0270176	6.37144	5.16692	5.74342
4.60095	1.39609	2.20711	5.28261	4.07881	4.53154
2.17155	-1.03222	0.529366	2.31957	1.11702	1.61358
4.24259	1.04013	1.22057	8.28905	7.0866	7.30668
1.61498	-1.5855	-0.319352	3.58579	2.384	2.29347
1.58542	-1.61171	0.0270176	1.48294	0.281638	0.00890026
5.73432	2.53889	2.36578	5.34612	4.14502	4.38402
5.27757	2.08325	2.3049	1.7497	0.550671	1.7206
4.24117	1.04887	1.66676	3.05234	1.85376	2.72625
3.45375	0.271086	0.793491	0.809596	-0.388806	0.0465825
9.13567	5.96515	6.01625	4.42722	3.22935	3.27823
3.85715	0.695183	1.34176	5.61949	4.42215	4.54063
9.45082	6.29143	6.16687	2.48948	1.29263	3.15922
2.40246	-0.747819	-0.230093	5.08265	3.88617	4.32143
2.80076	-0.349468	-0.963463	4.77778	3.5813	3.49794
6.43669	3.29282	3.56986	4.17084	2.97515	2.91424
2.60604	-0.532546	-1.82161	5.20587	4.01122	4.59912
3.18744	0.0589895	0.0632381	6.97256	5.77888	5.64634
2.09601	-1.03079	-0.682427	2.60102	1.40765	1.86564
10.5019	7.3841	8.09005	4.45378	3.26117	3.58157
3.41237	0.294778	1.37589	8.28567	7.09336	7.16543
2.04358	-1.06469	-0.932844	4.45118	3.25934	3.16841
3.86251	0.75491	1.09183	4.19343	3.0023	3.41706
5.12369	2.01796	3.16304	2.48446	1.29345	1.94495
3.19958	0.0955384	0.256347	1.67517	0.484442	0.97043
4.41684	1.31812	-0.333244	3.81486	2.62527	2.70583
2.31615	-0.782059	0.469741	6.0783	4.88952	5.05579
10.0156	6.91932	6.80839	5.23623	4.04803	4.38516
3.05877	-0.0366964	-0.616925	2.50486	1.31712	2.27157
2.77512	-0.31835	1.14234	7.99822	6.81211	6.75139
7.66783	4.57734	4.88435	2.96056	1.77475	2.36578
3.03481	-0.0450933	-2.15102	2.91926	1.7337	2.07455
2.41638	-0.66282	-1.79751	5.03375	3.8482	4.47493
4.43553	1.35728	1.0638	4.87128	3.68587	3.94739
8.36254	5.28435	5.07814	3.45284	2.26772	3.34523
4.21024	1.13956	-1.65549	7.0594	5.8746	6.24602
4.79736	1.74011	0.716736	4.00508	2.82044	3.04372
3.98703	0.93033	1.8699	2.36919	1.18459	2.59578
3.4944	0.448836	0.467718	7.04858	5.86594	6.03673
4.98509	1.94529	2.19605	4.35178	3.16961	3.78604
4.33358	1.29486	2.79298	5.67473	4.49386	4.37442
1.71894	-1.31183	-0.982565	2.18491	1.00503	2.31931
2.90653	-0.122918	-1.70363	3.88174	2.70287	2.7471
1.71694	-1.31183	-0.235279	4.1547	2.97686	2.79894
3.69799	0.677031	1.38891	1.76845	0.59072	0.879248
3.84176	0.826914	1.12281	3.16726	1.98967	2.2453
3.26446	0.253179	0.583311	5.56226	4.38566	4.54463
4.49405	1.48557	0.379593	3.97878	2.80336	3.06165
4.703	1.69688	1.60006	6.30778	5.13414	5.66526
2.72257	-0.282767	1.21486	4.58971	3.41648	3.27046
3.29919	0.313288	0.858103	5.49629	4.3232	4.90902
6.00184	3.02108	3.83149	5.6756	4.50294	4.83106
2.35017	-0.629251	0.64873	6.23905	5.06695	5.3814
2.76872	-0.199507	0.248883	2.78187	1.61099	1.34152
1.87279	-1.09531	-0.0643334	3.34411	2.17368	1.87304
3.19597	0.235494	-1.83174	4.24878	3.0829	3.99933
3.02906	0.0732842	0.971156	2.42506	1.26127	1.66061
4.32019	1.36732	2.04587	5.1373	3.97361	3.94971
6.75657	3.80371	3.94401	6.95497	5.79141	5.79309
5.19042	2.24999	2.26622	4.29544	3.1344	3.69741
9.15447	6.21605	6.33287	6.78714	5.62694	5.37199
1.6434	-1.28121	-0.193249	4.29665	3.13701	4.03068
5.3528	2.43481	2.80422	6.84123	5.68212	5.87148
1.82058	-1.09531	-0.235279	6.15704	4.998	5.32412
1.78741	-1.12764	-1.83174	4.1924	3.03344	4.02375
3.11617	0.20317	-0.173964	5.90738	4.74918	4.56018
4.50486	1.59979	1.21104	2.18309	1.02514	2.19827
2.34951	-0.555142	-0.505919	4.8999	3.74201	4.03808
2.21557	-0.686712	-0.235279	8.00375	6.8471	6.93749
3.79661	0.896678	0.907021	5.11805	3.96148	3.72216
1.80458	-1.09531	-1.83174	2.89797	1.74168	1.76054
2.35252	-0.54268	0.75499	5.145	3.9893	4.49298
3.47875	0.587356	0.453218	5.07436	3.91893	3.69844
10.2121	7.32717	7.8918	4.888	3.73378	3.84579
3.6	0.718392	0.935667	5.82297	4.66941	5.22867
2.80175	-0.0794039	-2.15102	4.5948	3.44129	4.02461
4.63596	1.75505	2.85638	3.13145	1.97818	1.67393
1.63814	-1.23855	-0.720826	4.11214	2.95926	2.96136
4.43525	1.56048	1.35312	4.84553	3.69271	4.14881
2.95708	0.0824292	0.559738	6.86829	5.71583	5.77516
6.74615	3.87368	4.79753	8.85095	7.69923	7.48454
2.7332	-0.121658	0.69254	6.7175	5.56641	5.82148
3.89294	1.0395	1.05611	5.61603	4.46751	4.26161
11.4586	8.60576	8.97504	3.11482	1.96782	1.97521
3.11759	0.272493	1.47483	5.3824	4.23577	4.09567
5.47233	2.63236	2.44347	3.53805	2.39164	2.94099
3.01447	0.177025	-0.686369	6.77629	5.63031	5.50317
0.987049	-1.84805	-1.06808	3.91094	2.76617	3.10904
2.61845	-0.215332	-1.50439	3.36715	2.22256	2.09629
6.54713	3.71633	3.54228	1.72797	0.583444	0.549519
2.9037	0.0802918	0.608793	3.64779	2.50509	3.34197
2.11162	-0.710707	-1.04166	5.03992	3.89771	3.74852
7.59642	4.77605	5.44097	5.75472	4.61568	4.40494
3.62031	0.811706	2.07297	2.69213	1.55477	2.42008
3.31215	0.51082	1.5331	3.01531	1.87975	3.14876
3.85469	1.05405	1.92752	3.13118	1.99588	2.21786
4.61883	1.82386	1.5016	4.71113	3.57675	4.15066
2.32357	-0.470304	0.18981	5.17666	4.04256	3.72866
4.25482	1.46611	2.23047	4.55772	3.42364	4.13414
3.31032	0.526196	0.961658	8.42549	7.29161	7.81868
5.73233	2.96817	3.23519	5.71025	4.57646	5.55932
3.47484	0.713419	-0.407653	3.06282	1.92912	1.69866
4.56125	1.80646	1.71657	7.16388	6.03086	5.90493
3.64935	0.89825	1.32166	7.06878	5.93686	5.93062
3.28427	0.536523	0.449652	4.06666	2.93488	2.75255
6.18205	3.43545	3.35394	5.09399	3.96222	4.59866
4.31662	1.57168	1.78607	3.08733	1.9567	1.74609
2.6658	-0.0763129	0.0270176	5.87562	4.74511	4.63934
8.32681	5.58497	6.18383	6.69366	5.56336	5.82735
4.38804	1.64917	0.815333	5.65788	4.52802	4.77419
10.0091	7.27146	7.22364	5.89013	4.76226	5.26662
5.7815	3.04486	2.66513	4.74467	3.61682	4.02708
4.02599	1.29174	1.97199	3.89165	2.76499	2.48601
4.39747	1.66424	2.58043	4.50888	3.3826	3.283
9.10402	6.37127	7.09062	6.41694	5.29097	5.73061
8.74584	6.01791	6.03622	4.37431	3.24873	3.27429
11.6635	8.93754	9.82836	2.18674	1.06189	0.881342
1.59819	-1.12041	-1.82451	5.49239	4.36878	4.15963
3.09853	0.381768	0.271703	4.21246	3.08934	3.0645
4.56925	1.86143	2.24743	7.09979	5.977	6.29137
3.68453	0.977357	1.43951	3.92205	2.79958	2.5329
6.11786	3.42662	4.49822	7.22046	6.09907	6.23869
1.67105	-1.01522	-2.07093	4.15753	3.03711	3.11969
4.03427	1.35192	1.55913	6.38262	5.26332	5.29036
1.95683	-0.721728	-0.110272	3.82454	2.70529	2.80306
10.1799	7.50197	7.51442	6.14795	5.02871	5.09745
10.525	7.85284	8.53467	4.89192	3.77508	3.43847
12.1048	9.43547	9.96548	5.28029	4.16427	4.64771
3.06029	0.396074	1.44468	3.63124	2.51546	3.19067
9.57162	6.91194	7.34086	4.22203	3.10686	2.75352
10.7688	8.11318	8.89575	6.16918	5.05407	5.28124
4.59001	1.93685	2.61281	3.40685	2.29335	2.73068
8.61044	5.96204	6.03456	5.89076	4.77745	4.86843
9.48829	6.84008	6.61986	3.11959	2.00888	2.00928
3.33568	0.688739	1.55625	1.6883	0.577867	0.944321
3.76263	1.11724	1.4764	7.77194	6.66193	6.4691
4.59211	1.94929	2.1205	4.59425	3.48502	4.30417
5.76024	3.11963	3.04851	4.18929	3.08044	3.07341
5.48518	2.8477	2.86981	4.39154	3.28269	4.4014
3.92344	1.28696	0.681945	4.82097	3.71268	3.76978
9.58461	6.9505	6.9209	2.64793	1.54034	2.22643
1.84184	-0.789446	-0.801123	4.23894	3.13159	2.75614
3.98079	1.35023	0.986091	6.23614	5.12985	5.64589
9.95337	7.32312	8.20185	5.55193	4.44633	4.86546
1.5803	-1.04908	-1.75318	4.20703	3.10232	3.12426
3.61862	0.989845	-0.302158	3.42309	2.31883	3.04365
1.92048	-0.705909	-0.297524	5.40805	4.30404	4.46572
4.09946	1.47676	-0.0498339	3.62429	2.52047	3.08047
1.81628	-0.805796	-0.930066	3.49812	2.39504	2.02517
8.22088	5.5991	5.57363	5.11588	4.01364	3.7396
4.71969	2.09924	2.87239	4.53946	3.43735	3.2569
3.65155	1.03314	1.14829	3.68425	2.58229	2.68049
3.48373	0.866057	0.786926	6.84207	5.7428	5.69754
7.18693	4.5721	4.49961	5.19285	4.09371	3.91007
3.62662	1.01973	1.17736	7.58196	6.48282	6.77173
9.15985	6.55797	6.83769	5.63571	4.53679	4.44134
4.64885	2.04845	2.52185	2.29782	1.20021	1.22587
2.07695	-0.521041	-1.79751	4.55315	3.45596	3.26721
9.62059	7.02285	7.82041	8.79145	7.69427	7.81786
1.48284	-1.1146	-2.13797	4.34446	3.24729	3.33804
9.16696	6.57271	7.02118	2.04396	0.948072	1.68266
3.53149	0.942188	0.0991509	1.16499	0.0693098	0.58387
2.10883	-0.478396	-0.0394441	3.05462	1.95918	2.83293
1.23758	-1.34947	-1.83174	2.0276	0.932463	0.884308
3.5098	0.92581	1.22492	5.75027	4.6553	4.78928
3.49413	0.912667	0.446092	2.47397	1.37973	1.4483
4.92634	2.34616	2.72414	3.24339	2.14967	3.97403
1.22621	-1.34947	-0.963463	2.54066	1.44718	1.26138
1.47816	-1.09531	-0.223869	6.28175	5.18942	4.7935
5.73945	3.16906	3.47546	2.66764	1.57541	1.93913
1.90593	-0.66282	-0.151016	5.77289	4.68101	4.7764
2.09257	-0.474638	0.385789	4.54098	3.44924	3.32284
7.44205	4.8749	4.82926	6.536	5.44494	5.48908
2.41635	-0.146184	0.543653	1.95985	0.869248	1.83153
4.51686	1.95589	2.87986	5.14035	4.05019	4.27131
4.94505	2.3861	2.11988	2.13544	1.04531	2.46743
3.70966	1.15137	0.951982	5.13803	4.04929	3.81164
4.64265	2.08533	2.44705	3.40086	2.31305	2.5799
5.14943	2.59337	2.38986	2.92785	1.84219	2.21479
3.67033	1.11498	0.279393	3.84133	2.75695	3.42907
-0.0565322	-2.61171	-1.79751	4.38278	3.29878	3.18215
4.08828	1.53755	2.30369	3.8356	2.75326	3.03626
3.2654	0.715449	1.10145	3.27726	2.19567	2.8344
6.23497	3.68767	3.99871	3.9941	2.91277	2.74813
3.86128	1.31824	0.272413	8.18327	7.1025	6.94006
4.79306	2.25147	2.22497	5.22534	4.14579	4.33408
11.7373	9.19583	9.87163	5.84465	4.76631	4.47507
3.4542	0.912859	1.94612	6.76114	5.68284	5.85628
1.72239	-0.818622	0.0962597	3.77459	2.69643	2.4689
5.98903	3.45039	4.11737	3.0791	2.00124	2.39394
3.86873	1.33203	1.66129	5.41245	4.33488	4.20047
11.0789	8.54255	8.30689	4.99446	3.91782	4.36007
3.41555	0.879765	0.940745	3.8488	2.77408	2.6768
3.26287	0.728605	0.746504	4.32969	3.25595	3.47554
3.66739	1.13392	2.04658	3.27246	2.20012	2.21381
2.74378	0.210522	0.916644	6.42556	5.35338	5.36355
3.75968	1.23625	1.90721	7.84911	6.7787	7.00624
10.9826	8.45975	8.74838	4.75299	3.68308	3.75868
6.1949	3.67522	4.14947	1.53914	0.469269	2.12719
3.43458	0.915013	1.24196	2.78901	1.72014	2.41471
4.81461	2.29628	2.01282	5.89053	4.82297	4.77055
3.31504	0.797611	-1.1539	6.53577	5.46926	5.29512
7.0304	4.51325	4.8707	3.5128	2.44639	3.18165
9.53119	7.01413	7.84865	4.76708	3.70164	4.58103
2.24017	-0.272124	0.365372	3.58308	2.51832	3.10862
6.61738	4.1065	4.12753	3.59869	2.53593	3.36053
3.62225	1.11704	1.26212	3.5963	2.53521	2.30093
3.73376	1.22922	2.11843	3.47897	2.41819	3.4418
11.0651	8.56358	8.09298	3.14862	2.08793	2.33158
5.47261	2.97258	3.35079	4.32927	3.26905	3.80426
5.93267	3.43547	2.72602	4.32804	3.26799	3.52139
2.63327	0.137083	0.378322	5.12713	4.06757	4.09987
4.68025	2.19041	2.41443	3.44595	2.38673	1.95896
3.73524	1.24541	1.45213	4.06301	3.00385	2.71164
7.75942	5.27013	5.84359	4.06401	3.0054	2.86916
4.27187	1.78258	2.75669	4.49444	3.43602	3.56293
10.3705	7.884	8.41443	3.14269	2.08443	1.83554
3.08023	0.594587	-2.14378	1.98859	0.931251	0.907878
4.53756	2.05215	2.52349	1.98859	0.931251	2.26138
4.32071	1.8358	1.07031	-1.0703	-2.12764	-1.79751
3.4542	0.970542	0.40045	0.941286	-0.116055	2.12452
8.54628	6.06444	6.27245	4.57219	3.51544	3.80656
4.78998	2.3146	3.07427	4.48285	3.42619	3.64448
3.54266	1.07087	1.62054	5.30631	4.25038	4.26415
2.32615	-0.144055	-0.947518	2.44388	1.38845	2.07814
1.06246	-1.40748	-0.778332	4.91052	3.85513	3.91379
2.02101	-0.448323	-0.912064	2.04104	0.986294	1.06284
7.38018	4.91738	5.27737	3.23437	2.17989	2.98991
1.79602	-0.66282	-2.15102	0.940552	-0.113143	0.57615
2.70002	0.241286	1.05799	0.738924	-0.311825	1.7656
3.08128	0.62652	0.488359	5.53488	4.48443	4.71637
2.60465	0.15063	1.02223	1.72855	0.67827	1.59927
3.80829	1.35548	0.927555	1.56065	0.510557	1.4003
9.35028	6.89775	7.69275	1.85496	0.805869	0.474918
9.89559	7.4448	8.39137	6.7744	5.72531	5.84021
6.17138	3.72136	3.54295	7.04167	5.99308	6.08385
10.4837	8.03446	8.6844	4.44178	3.39343	3.8879
6.09655	3.64757	3.94986	4.6949	3.64679	3.67224
5.37173	2.92732	2.79192	1.54317	0.495709	1.85325
3.14271	0.699909	0.769354	2.94796	1.90097	1.70038
3.40494	0.965264	0.48299	4.99089	3.94445	4.64752
6.24453	3.8052	3.91037	4.03542	2.98911	2.86493
1.08711	-1.34947	-2.15102	4.37893	3.33265	2.99567
3.98765	1.55703	2.2609	7.20797	6.16214	6.37009
4.38902	1.96204	0.806393	4.02722	2.98154	3.22549
10.2008	7.77586	8.34685	5.76419	4.7187	5.02436
4.55917	2.13423	1.0884	6.14489	5.10004	5.40641
7.56338	5.13979	5.53777	4.65165	3.60791	3.48279
11.153	8.73056	8.42291	2.54166	1.49828	1.64589
3.66761	1.24527	1.66387	6.11632	5.07365	5.61508
11.7879	9.36681	9.86303	2.58077	1.53976	1.18227
3.96965	1.55722	2.11742	5.71742	4.67647	4.67741
5.19362	2.78575	2.79313	4.16972	3.12925	3.90827
5.00601	2.6017	2.83848	3.44717	2.40674	2.73336
4.52566	2.1215	1.15988	3.69684	2.6579	2.89843
3.82319	1.41913	1.25325	3.42067	2.38177	2.5987
7.08047	4.67876	4.83425	3.85631	2.81939	2.44844
1.90652	-0.494067	-1.60487	3.08376	2.04714	1.61644
6.50282	4.10696	3.7953	3.8073	2.77111	2.75616
3.07405	0.67827	1.0084	4.61191	3.5758	3.79842
6.2144	3.81899	2.45062	4.21828	3.18285	3.41022
9.24342	6.84884	6.70975	3.8654	2.83056	2.94753
5.40299	3.00961	1.9243	6.73137	5.69728	6.1967
5.25401	2.8671	3.04732	5.37635	4.34283	3.95739
7.74223	5.36074	5.50317	4.63404	3.60087	3.6048
5.96554	3.58468	3.99627	4.71681	3.68374	4.71932
2.63677	0.260022	-0.902477	3.63615	2.60313	3.50491
3.55628	1.17993	1.51006	5.21767	4.18474	4.13583
5.68922	3.31383	3.05102	3.31584	2.28414	2.18802
6.03571	3.66087	4.46693	3.91909	2.88762	3.23039
2.39302	0.0193667	0.551217	3.57374	2.5425	2.39066
4.51666	2.14768	1.89887	4.72428	3.69322	3.72692
3.17938	0.813812	1.03616	3.76856	2.73758	2.74287
4.02466	1.66384	1.37832	5.62492	4.59403	4.72079
0.231977	-2.12764	-2.15102	1.9093	0.880027	1.32677
2.05959	-0.299563	-0.781837	6.69375	5.66495	5.98855
8.72243	6.36682	6.69973	5.70347	4.675	4.81257
9.07822	6.72318	6.55389	0.54293	-0.485223	0.127427
4.12775	1.77273	1.43722	3.27337	2.24541	2.40425
8.88089	6.52859	6.36692	5.949	4.92215	5.30846
0.223388	-2.12764	-2.15102	4.29611	3.26984	3.71606
6.55237	4.20421	3.74576	5.67589	4.64967	4.29609
3.01482	0.670807	0.802649	4.56592	3.5407	4.5554
5.73296	3.39044	3.95363	3.15544	2.13134	3.16774
4.64174	2.3013	2.82072	4.43504	3.41123	3.97946
0.212056	-2.12764	-1.79751	3.19933	2.17569	1.92291
4.21115	1.87151	1.64687	3.24839	2.22557	2.07472
2.42665	0.087222	-0.170974	4.07677	3.05425	2.81694
7.53693	5.19786	5.07819	5.19348	4.1711	4.49941
3.01409	0.675268	-2.12628	3.46042	2.43836	2.56563
3.7462	1.40752	1.49944	3.66844	2.64683	3.2575
3.82584	1.48925	-0.248595	3.2317	2.21109	2.89407
4.80281	2.46891	0.860572	4.70593	3.68601	4.5113
2.9163	0.582938	0.361077	7.04253	6.02371	6.35017
11.5484	9.21828	9.931	3.93109	2.91249	3.53937
5.47253	3.14734	3.71809	4.1598	3.14241	2.88279
9.07263	6.75536	6.8755	4.5444	3.52722	3.55478
12.8857	10.5744	10.5141	7.20973	6.19273	6.06458
2.40886	0.0987735	0.144721	3.79065	2.77368	2.71478
5.48093	3.17205	3.23778	2.60085	1.58414	1.65779
8.97634	6.66932	6.67116	4.0573	3.04124	2.90591
4.5288	2.22414	2.97332	2.05762	1.0428	1.31913
3.10529	0.801036	-0.345454	4.63442	3.6197	3.87304
4.44915	2.14792	2.21753	4.61719	3.60252	3.70428
3.08263	0.78319	-0.620407	6.33574	5.3217	5.48897
6.91941	4.62031	4.44669	4.21389	3.20057	3.84874
4.13193	1.83874	2.4925	5.43673	4.42352	5.56711
4.75539	2.46369	3.11881	6.02813	5.01559	5.53749
2.66209	0.370727	0.47094	6.77449	5.76244	6.15575
2.54666	0.25572	-0.297144	5.00437	3.99293	4.44133
10.6447	8.35757	9.1311	8.30329	7.29228	7.83563
10.7925	8.50736	8.34747	2.57191	1.56093	1.51101
2.68214	0.396958	0.0781612	5.74584	4.73535	4.54361
5.55292	3.26878	3.54899	4.10682	3.09733	3.52396
2.71605	0.433692	-0.0622848	2.88251	1.87402	2.48078
2.72745	0.445371	0.917363	4.31556	3.30809	3.12704
4.306	2.02791	2.11899	4.87939	3.87227	3.89286
4.96907	2.69099	1.47542	6.28191	5.27596	5.65034
5.0082	2.73235	2.56891	2.50643	1.50098	2.01011
2.21777	-0.0507955	0.613726	6.9961	5.99146	6.07304
4.10812	1.84101	2.53451	4.93003	3.9264	4.88028
4.82505	2.56351	0.969278	3.54588	2.54292	2.55845
4.3057	2.04953	1.48924	2.17889	1.17613	1.46859
3.47856	1.22318	0.899034	3.36534	2.36284	2.1116
3.57337	1.3193	1.06597	4.88128	3.87933	4.31603
10.7622	8.50833	8.41198	5.41356	4.41193	4.87061
5.94582	3.69508	3.9793	3.02788	2.0263	1.89919
5.22286	2.97252	2.26259	6.56078	5.55934	5.72249
2.69057	0.44139	0.808293	5.05189	4.05181	3.84539
5.58942	3.34086	2.98486	4.05487	3.05679	2.89071
4.91905	2.671	3.24809	5.64526	4.64745	4.57899
6.02826	3.783	3.89008	2.93573	1.93928	2.1151
6.72222	4.47705	3.91333	4.40585	3.41048	3.42046
4.74574	2.50374	3.02121	3.64299	2.64798	3.74961
3.6913	1.45009	1.67315	5.97047	4.97738	5.11626
3.32008	1.08033	0.782232	4.74355	3.7505	3.66338
5.24541	3.00731	3.55408	5.88816	4.89545	4.98908
2.37442	0.137083	0.446092	4.59739	3.60482	3.87724
4.53925	2.30314	2.75851	4.38371	3.39132	3.8433
5.94241	3.70806	4.26875	4.00411	3.01375	3.36681
3.55308	1.32163	0.607746	5.34147	4.3521	5.19882
5.88397	3.65253	3.7981	4.47884	3.48997	3.081
4.31817	2.08688	2.39573	5.72728	4.73853	4.94162
3.25726	1.02726	0.839561	3.71193	2.72337	2.67717
5.19254	2.963	3.61173	2.50436	1.51593	2.19791
4.32632	2.09715	2.31445	5.20126	4.21283	4.02366
5.51464	3.28654	3.18288	6.13854	5.15172	5.18499
10.4692	8.24389	8.16492	4.72494	3.73914	3.79011
5.19869	2.97462	3.50618	2.94859	1.96281	2.51938
3.04365	0.822672	1.06827	6.24798	5.2624	5.26857
2.47697	0.260698	0.248883	5.17212	4.18692	4.5467
5.133	2.92081	2.92147	6.17052	5.18535	5.33901
2.3622	0.15063	0.248883	5.22472	4.24086	3.90768
5.31315	3.10329	2.87001	5.48041	4.49682	4.72958
4.61221	2.40447	2.58673	5.62148	4.63798	5.04944
6.50927	4.30365	4.42241	4.52536	3.54187	3.70123
4.58846	2.38325	2.8449	5.67792	4.69651	5.04436
7.43323	5.22859	5.50855	7.86341	6.88214	6.96404
3.05695	0.858335	1.23479	1.95546	0.9742	1.1368
4.44076	2.2455	2.39779	4.67406	3.69358	3.48821
3.36284	1.17834	1.46171	3.8929	2.91251	2.96853
8.29672	6.11421	6.50531	4.32274	3.34287	3.64745
12.6132	10.4319	10.5116	4.84432	3.86509	3.44314
3.72964	1.54948	1.87887	5.70168	4.72261	4.85066
10.6742	8.49559	9.16121	3.95563	2.97691	3.35541
6.08608	3.90773	3.49028	4.40974	3.43211	2.93711
1.74442	-0.433455	-0.561268	3.4234	2.44615	2.07175
3.23568	1.06096	0.86175	6.71851	5.74149	6.06345
4.35694	2.18403	2.24282	3.96253	2.9863	3.50723
4.54867	2.37666	2.56199	2.98308	2.00729	3.25644
6.62737	4.45588	3.91861	3.53537	2.55959	2.3543
3.65899	1.48834	1.79542	3.85339	2.87872	3.126
4.78335	2.61646	1.48177	2.46198	1.48788	2.49868
10.9761	8.81453	9.39497	4.83231	3.85886	4.16841
6.29658	4.13525	4.66764	4.36671	3.39345	3.44681
4.18187	2.02252	2.46893	8.54861	7.57541	7.56532
6.51878	4.36283	4.51005	7.31401	6.34104	6.45815
4.3104	2.15548	2.0948	4.88585	3.91322	3.99988
6.66195	4.50785	4.91993	5.92743	4.95485	4.82813
4.01562	1.86222	1.83355	6.02478	5.05225	5.23658
4.12465	1.97188	1.96512	4.53216	3.5598	3.06436
3.50664	1.35738	-0.158888	4.90328	3.93164	4.01572
5.43806	3.28997	3.64736	5.91582	4.94526	5.19849
8.68054	6.53255	6.18103	6.88221	5.91187	5.99683
4.76176	2.61451	2.99189	5.17951	4.20972	4.6872
3.20833	1.0631	1.41879	6.21445	5.24535	5.123
3.55395	1.40874	1.85985	4.97934	4.01068	3.69645
2.37774	0.234448	0.808911	6.62692	5.659	5.68254
6.11415	3.97446	4.18971	5.14325	4.17539	4.4562
4.28586	2.14759	2.61796	4.70084	3.73505	3.90896
1.04269	-1.09531	-1.83174	5.3484	4.38351	4.47077
4.71016	2.57234	2.14526	2.44862	1.48425	1.2869
3.44202	1.3052	1.41351	3.08076	2.11641	2.00513
3.22924	1.09285	0.581148	4.64928	3.68499	3.69309
2.56154	0.425367	0.198342	4.58818	3.62431	3.68828
2.54591	0.40981	-0.963463	3.86495	2.90291	2.70381
3.53027	1.40101	1.17142	3.59714	2.63525	2.73768
3.54698	1.41807	1.82034	4.78947	3.82799	3.52961
5.53257	3.40603	2.66342	3.21095	2.24967	3.08328
2.18724	0.0610385	-0.232445	7.86973	6.90913	6.63662
2.91474	0.791874	0.378322	4.5675	3.60713	3.74523
4.37595	2.25451	2.55502	6.42707	5.46698	5.39182
2.78272	0.670469	-0.213474	4.81936	3.85956	4.06362
2.30527	0.194285	-0.814525	7.33719	6.37862	6.48321
7.94405	5.83464	5.51987	6.3504	5.39207	5.15376
1.62151	-0.486679	-0.425306	4.689	3.73079	4.68215
1.49929	-0.605927	-1.79173	3.27955	2.32139	2.31609
3.18434	1.07956	1.60879	2.20628	1.24815	1.02702
4.9712	2.86874	2.98945	4.59598	3.63785	4.05034
3.41713	1.31683	1.77469	4.28004	3.32199	3.61986
3.41282	1.31286	1.90001	3.50336	2.54554	3.02995
3.68307	1.58665	1.51779	5.59025	4.63257	5.55399
5.05092	2.95583	1.54794	6.02321	5.0657	5.43981
4.58232	2.48858	2.48618	5.03773	4.0808	4.2965
4.71869	2.62802	2.99901	1.87224	0.915744	1.67602
3.26122	1.1742	0.260129	2.36383	1.4078	1.25466
6.25093	4.17079	4.32795	8.68154	7.72657	7.97509
4.75692	2.68023	3.13986	7.41324	6.45866	6.37414
4.26642	2.19211	1.66241	4.70904	3.75485	4.544
4.18495	2.11245	1.78321	2.05422	1.10062	0.772939
2.40897	0.339493	-1.12481	8.68033	7.72731	7.42341
-0.542277	-2.61171	-2.15102	4.93671	3.98428	4.2546
4.11324	2.04447	1.51054	2.83987	1.88756	1.70772
4.04016	1.97341	2.44064	6.62528	5.67321	5.75221
3.00352	0.939381	0.315053	5.19979	4.24855	5.09315
8.94528	6.88542	7.44122	1.71694	0.765704	1.60879
6.33469	4.27573	4.63667	2.64354	1.69265	3.20955
2.01877	-0.0368858	-0.188591	4.81734	3.86693	4.09359
3.15449	1.09962	0.719176	2.9624	2.0125	2.14434
1.60083	-0.453989	-0.831742	3.51981	2.57025	2.92926
5.6287	3.57406	3.53526	3.70824	2.75881	3.33305
5.80872	3.75485	4.08089	4.8724	3.92461	4.13553
7.63897	5.58592	5.34307	5.40483	4.45782	4.76842
2.3023	0.249427	0.625952	5.59328	4.64682	4.70807
4.01031	1.9581	2.34411	4.59389	3.64904	3.36397
4.65976	2.60779	2.00741	3.74156	2.79817	2.32402
3.32775	1.27988	0.1039	3.89697	2.95445	3.19262
3.83994	1.79375	1.78965	4.50996	3.56795	4.45897
5.58015	3.53714	3.48133	4.08397	3.14305	2.87395
7.45094	5.41011	5.35406	7.35057	6.41005	6.22181
4.00361	1.96581	0.988365	5.52589	4.58573	4.5845
1.70678	-0.330524	-0.235279	3.39017	2.45011	2.0948
2.24834	0.212028	0.234583	3.74407	2.80497	3.19252
0.720943	-1.31183	-0.982565	2.67823	1.73937	1.80265
1.78431	-0.245854	-0.729855	5.36247	4.42517	4.99135
2.8199	0.791885	-0.788828	4.62949	3.69313	4.50666
4.16506	2.1371	2.09745	4.04979	3.11366	3.22743
4.01865	1.99262	1.95729	3.07561	2.14072	2.61653
3.61733	1.59331	1.67948	4.75779	3.82332	3.53181
5.54118	3.52182	3.10275	5.59672	4.66328	5.17312
4.80262	2.7866	3.14452	1.64252	0.709146	1.21913
3.32145	1.30607	0.30721	3.9488	3.01676	3.42184
5.27819	3.26433	2.60841	4.2864	3.35437	3.59144
3.52528	1.51489	1.48295	5.52873	4.59845	4.57319
1.0035	-1.00421	-0.674077	3.84881	2.91855	3.1321
2.65186	0.64472	0.876654	6.16923	5.23973	5.52792
1.50528	-0.499722	-1.83174	3.41193	2.4826	2.14771
6.68986	4.68696	5.07537	4.39143	3.46311	3.25006
3.3717	1.36892	1.59987	5.32873	4.40092	4.65867
2.67207	0.669476	0.499211	3.98831	3.06071	3.21043
2.89303	0.892551	0.407468	4.41908	3.49239	3.29454
8.85944	6.8602	7.07353	4.36004	3.43481	3.76581
5.62852	3.63269	2.73843	4.58192	3.65793	4.03438
4.35191	2.35626	2.22375	4.23053	3.30705	3.4484
3.10365	1.10864	0.154966	4.62325	3.70019	3.19073
2.61075	0.616021	0.813783	5.06602	4.14321	3.85372
3.51869	1.52479	1.74742	2.9218	1.9991	2.22904
4.80342	2.81852	3.01584	5.08958	4.16719	4.33274
5.73737	3.75298	3.70026	3.93083	3.0089	3.06576
2.5811	0.598327	0.510987	3.17236	2.25058	2.75316
2.13669	0.153915	-0.933425	1.84557	0.923947	2.05086
3.38539	1.40287	1.66644	1.90237	0.9821	1.67296
1.46138	-0.521041	-0.333244	5.72816	4.80818	4.4968
3.26414	1.2832	1.42084	3.50552	2.58629	2.89298
4.83036	2.85228	2.97356	4.14441	3.22523	3.67886
5.00987	3.03432	2.97883	3.45426	2.53554	2.9321
3.32534	1.34986	0.716919	4.57624	3.65814	3.89401
3.01035	1.03588	0.928379	5.19875	4.28067	4.42733
2.87272	0.898643	-0.302158	4.51201	3.59423	4.08337
6.03614	4.06291	2.16943	3.93292	3.01573	3.4464
5.37989	3.4173	3.49501	7.06976	6.15261	6.4987
3.82976	1.87577	1.62334	2.5154	1.59841	1.87072
5.45163	3.50283	3.35254	2.95092	2.03513	2.74407
3.79519	1.84646	2.24625	4.95594	4.04067	3.80092
4.19486	2.24701	2.65564	4.7824	3.86736	4.02137
8.14298	6.19517	5.85072	5.90798	4.99546	4.77682
4.33377	2.389	0.168274	3.34569	2.43342	3.64692
5.04477	3.10028	2.68298	3.5882	2.67604	3.17569
3.96361	2.02014	1.69818	5.67174	4.75989	5.47565
6.11385	4.17083	4.53657	3.16072	2.24986	2.39873
5.80107	3.86113	2.86498	4.68078	3.77073	4.10743
3.88601	1.94736	1.67203	4.97589	4.0675	4.11046
1.26598	-0.672213	-0.331057	3.58048	2.67282	2.50466
3.4418	1.50794	-0.800393	4.89501	3.98741	3.71451
2.01412	0.0824381	0.0510044	4.68057	3.77338	3.91815
2.75538	0.824175	0.487064	5.28621	4.37925	4.61819
9.59557	7.66969	7.58865	5.42268	4.51628	4.76267
4.91307	2.98831	2.34114	3.68569	2.7793	2.63857
6.37738	4.45399	4.53572	2.92354	2.01756	2.92105
4.35112	2.4326	0.944403	4.92891	4.0235	4.13246
2.4013	0.482785	0.898826	3.13649	2.23195	3.2375
4.99956	3.08419	3.38164	5.81951	4.91641	4.65351
3.3489	1.43643	1.84228	3.7745	2.87317	3.52455
3.22252	1.31043	1.34815	3.34756	2.44626	2.91681
4.61764	2.70652	2.86582	2.31182	1.41103	1.77651
4.87223	2.96173	3.1326	6.03469	5.13403	5.59118
2.06349	0.153265	-0.345557	6.70061	5.80062	6.20121
2.12961	0.22055	-0.63083	6.35973	5.45987	5.22595
4.35539	2.44749	2.43234	3.36004	2.46051	1.91465
5.93761	4.03097	3.51478	5.43055	4.53133	5.05691
2.9906	1.08423	0.99065	2.62008	1.72103	1.70014
4.58736	2.68325	3.02906	1.52593	0.627007	0.316845
3.08607	1.18287	0.6338	1.89707	0.998301	2.28741
3.03047	1.12912	1.47204	4.2901	3.39141	3.29444
7.42347	5.52341	5.00541	5.71783	4.81967	4.66976
3.1568	1.25962	1.4638	4.43486	3.53704	4.08741
1.82067	-0.0763129	0.315053	2.84209	1.94454	2.2238
2.26339	0.370755	-0.101922	2.37918	1.4822	1.81192
4.87149	2.97916	3.26157	2.99245	2.09578	2.1083
4.39321	2.50223	1.87225	5.27625	4.38033	4.27223
4.36098	2.47699	1.74187	2.96894	2.07415	3.39758
4.2693	2.39571	2.25816	3.98457	3.09006	2.56807
2.71141	0.839303	0.866348	4.79251	3.898	3.34846
8.62285	6.75301	6.66475	5.30468	4.41031	4.474
4.26831	2.39847	2.2644	2.42312	1.52883	1.70574
3.99413	2.12595	2.47194	2.21773	1.32411	0.954335
3.39834	1.53233	0.832396	2.86444	1.97082	3.1343
3.0561	1.1916	-0.563733	4.09087	3.19727	3.32012
3.20535	1.34441	0.961567	5.15514	4.26205	4.28466
4.26791	2.40889	2.40403	8.09436	7.20169	7.4582
3.73767	1.87961	2.10967	3.88321	2.99094	3.17571
3.80118	1.94457	1.10898	2.7005	1.80896	1.32669
4.32677	2.47609	2.67496	7.20429	6.31301	6.43314
2.42687	0.57736	0.760745	3.99266	3.10196	2.86223
5.79888	3.94944	4.05723	5.63387	4.74335	4.72868
0.720943	-1.12764	-0.982565	6.61302	5.72319	6.21772
2.88614	1.04056	0.697169	6.23136	5.34238	5.74587
8.60208	6.76162	6.79401	5.94685	5.05802	5.20765
4.34068	2.50078	2.66089	1.77452	0.885774	0.345673
3.74287	1.90469	1.20249	4.37568	3.48773	3.52321
3.95007	2.11413	2.2389	2.99872	2.11081	2.7135
9.9165	8.0811	7.94548	7.1247	6.23754	6.537
3.38065	1.54548	1.25172	3.32368	2.43724	3.08894
3.78078	1.94561	1.5711	8.55366	7.66815	7.74427
2.41439	0.579288	0.359255	2.79003	1.90498	2.55276
5.64448	3.81051	3.9965	5.97605	5.09193	5.34005
4.22237	2.39115	2.06856	4.16279	3.27927	3.02472
5.52004	3.69004	3.62581	5.65498	4.77156	5.2863
8.30337	6.4736	6.75774	2.22925	1.34586	1.5195
5.08302	3.25409	2.63506	1.55756	0.674324	0.523133
10.1491	8.32297	7.92714	4.46107	3.57793	3.57199
6.94027	5.11562	5.02068	2.53299	1.65053	2.43395
4.2183	2.39649	2.22562	3.29979	2.41811	2.91939
4.92308	3.10234	3.30506	3.41213	2.53159	2.04898
2.02619	0.206925	-0.594623	6.46589	5.58576	5.58105
3.93716	2.11863	1.95815	2.91538	2.03623	2.657
4.1239	2.30631	2.44376	1.49941	0.620749	0.1039
1.52742	-0.287487	-1.98451	4.82703	3.9485	3.5373
4.89911	3.08638	2.59384	1.68946	0.811706	2.17282
5.97618	4.1697	3.12974	3.04211	2.16501	2.87274
4.30719	2.50131	2.12919	4.13485	3.25791	3.44654
4.16146	2.35558	2.48076	5.54822	4.67138	4.92839
4.36016	2.55431	1.652	6.50424	5.62815	5.82153
7.61173	5.80762	5.8596	5.72	4.84467	5.13158
3.43158	1.62792	1.17877	5.74574	4.87053	4.99325
1.91338	0.112256	0.302377	5.3433	4.46905	4.33416
4.75538	2.95492	2.85651	3.43686	2.5627	2.60236
3.13397	1.338	1.5867	6.81507	5.94177	5.92883
3.97916	2.18918	1.78742	5.61168	4.73957	5.07442
2.57499	0.786112	-1.09962	4.29348	3.42148	4.18661
2.40344	0.615366	-0.295238	4.4952	3.62346	3.47199
5.77337	3.99207	3.72462	9.25895	8.38802	8.48319
5.74186	3.96091	3.06891	5.21562	4.34536	4.51294
3.51053	1.73093	1.84367	3.62093	2.75096	2.54444
7.77034	5.99091	6.22517	4.78004	3.91025	3.96771
5.53339	3.757	2.47853	4.54113	3.67173	3.34695
4.97827	3.20209	2.98907	6.49292	5.62388	5.89676
2.40129	0.62583	0.849543	6.55353	5.68635	5.7349
5.46867	3.695	2.75163	6.27315	5.40623	6.17268
3.40991	1.63821	1.78813	1.67468	0.809527	1.34618
4.73514	2.9648	2.22315	5.70654	4.84141	4.67534
1.92557	0.155502	-1.79965	4.19122	3.32685	3.47612
1.97932	0.209253	-0.409155	4.86578	4.00187	3.99794
4.05724	2.2876	2.03469	4.30836	3.44596	2.92711
10.5184	8.74904	8.88132	4.08892	3.22674	3.88482
4.35459	2.58586	2.84425	3.54393	2.68279	2.22958
3.15009	1.38348	1.01231	5.40446	4.54368	4.55596
7.18262	5.41923	5.63739	6.7396	5.87885	6.1872
2.42196	0.660035	-0.321036	3.35685	2.49654	3.71133
5.00466	3.24564	2.95972	4.64887	3.7901	3.67942
5.12523	3.36659	2.68096	3.84926	2.99071	2.70276
10.6932	8.93508	9.04586	6.76593	5.90838	5.96359
1.08874	-0.667834	-1.81286	3.30133	2.44501	2.99532
4.26631	2.51039	1.52921	3.67887	2.82301	2.9789
4.57885	2.82443	2.69818	4.14338	3.2883	3.45812
2.6543	0.899881	0.773633	6.25875	5.4038	5.34153
2.73652	0.982582	0.35053	3.84275	2.98805	3.67367
3.28781	1.53478	0.365858	7.67837	6.82378	6.87902
2.5362	0.783203	0.660613	6.52883	5.67485	5.44605
3.69844	1.94596	1.98479	3.30831	2.45451	2.60104
6.32764	4.5787	4.28488	5.59316	4.73967	4.67103
3.60143	1.85281	0.707777	6.15787	5.30475	4.80573
5.35964	3.61141	3.69631	5.8027	4.95042	5.27861
9.03706	7.29335	7.05079	7.41203	6.56207	6.7315
3.80582	2.06227	1.52239	2.91275	2.06302	1.97317
5.9478	4.20451	3.8844	5.2763	4.42826	4.52148
3.7288	1.98724	1.991	2.85854	2.01058	2.5026
4.01086	2.2719	1.77046	5.14363	4.2957	4.04096
1.098	-0.639317	-2.15102	3.67214	2.82483	3.37836
5.50189	3.76476	3.82584	2.8842	2.03702	1.83445
2.45678	0.720732	0.249984	2.66068	1.81385	2.0813
4.99494	3.26057	2.26018	2.53917	1.69265	1.55281
1.049	-0.685269	-1.8303	5.08254	4.23638	4.35318
6.35389	4.62386	4.50447	7.02225	6.1762	6.71263
3.88123	2.15531	1.52974	5.63909	4.79307	4.92905
2.42284	0.696985	-1.6073	5.22529	4.37935	3.97884
4.94628	3.22063	2.37723	2.86097	2.0153	2.09512
5.5485	3.82362	3.84237	2.82501	1.97969	1.49742
4.60241	2.88037	1.05988	3.06736	2.22229	1.83373
2.28733	0.566482	-0.0855591	9.62246	8.77791	9.01463
5.72814	4.0074	4.03923	3.82717	2.98265	2.68277
5.809	4.09077	3.44614	2.85211	2.00769	2.52219
2.43305	0.716611	0.453218	3.57307	2.72884	2.45026
5.89695	4.18055	3.44806	5.22701	4.38496	4.95317
3.86617	2.15094	1.56754	4.25998	3.41879	2.77879
4.96544	3.25216	3.35803	5.36142	4.52118	3.93692
3.85331	2.14056	1.73541	2.95903	2.11884	1.8597
1.48804	-0.22428	-1.73598	3.79427	2.9549	3.18572
3.57007	1.86284	2.04172	5.22749	4.38818	4.53506
1.3983	-0.307254	-0.212009	3.83117	2.99238	2.41645
2.67097	0.966949	0.82095	4.84039	4.0045	4.20359
5.5461	3.84382	3.32165	6.13522	5.3	5.24952
4.12239	2.42186	1.07633	2.17901	1.34562	1.72342
5.06579	3.36726	3.45785	3.15592	2.32254	3.49266
4.4302	2.73324	2.459	5.14413	4.31157	4.61027
4.45037	2.75346	1.70096	3.10164	2.27038	2.39738
3.19993	1.50315	0.840004	2.57755	1.74652	1.85317
3.33656	1.6433	1.0932	3.10479	2.27524	1.76994
4.87997	3.19125	2.98992	3.0697	2.24118	2.61968
4.92927	3.24224	3.17157	6.44287	5.61469	5.31517
3.49705	1.81073	1.02702	5.05416	4.22621	4.33145
4.13078	2.44474	2.00232	4.83508	4.00889	3.51364
2.6442	0.959667	0.327167	3.98072	3.15506	4.15793
7.59452	5.91231	5.45869	2.86689	2.04163	2.47176
5.97103	4.28912	4.37769	6.04336	5.21869	4.89259
3.60198	1.92072	1.1029	3.1495	2.32514	2.39353
4.07831	2.39809	2.08712	4.35338	3.52931	3.17835
6.63971	4.95973	4.61784	4.37818	3.55477	3.46522
3.8188	2.13927	2.03324	2.55486	1.73184	2.36742
5.48807	3.8113	3.84767	5.03702	4.21408	4.13874
6.16271	4.48704	4.36397	5.21197	4.3892	4.49476
4.17959	2.50577	2.13048	1.87834	1.05605	0.657632
5.16314	3.49216	3.60368	6.03798	5.21598	5.67668
5.58629	3.91819	3.58298	1.57252	0.752456	1.56095
2.21219	0.545872	-0.695681	5.53479	4.71638	4.11849
3.48945	1.82448	1.75807	4.19612	3.37903	3.2456
4.50807	2.84727	2.85822	0.57574	-0.241257	0.0350735
3.67063	2.01261	2.16762	6.48476	5.66806	5.46111
2.92731	1.26958	0.214816	5.56369	4.74722	5.07144
5.92837	4.27142	3.59076	6.04807	5.23196	5.38873
5.67734	4.02825	4.13909	4.01278	3.19743	3.42097
1.69761	0.0488686	-0.0643334	7.56066	6.74541	6.65482
5.77499	4.12854	3.79171	4.48302	3.66799	3.46605
6.03042	4.3847	4.46048	6.92058	6.10557	6.6864
5.15462	3.51442	3.26103	6.48046	5.66595	5.91954
2.69799	1.0589	0.437783	5.05771	4.24349	4.13057
3.87777	2.24148	2.28536	3.87253	3.05856	3.51206
4.48463	2.84889	2.29843	7.37746	6.56414	6.57231
5.16947	3.53433	3.55716	5.25423	4.441	4.97918
7.36342	5.72861	5.74526	4.7531	3.93994	3.33901
2.44717	0.813549	0.268785	4.09877	3.28605	3.50947
4.43438	2.80135	2.92975	8.34109	7.52852	7.66904
4.86093	3.22803	2.46262	6.67221	5.85976	5.59141
4.15244	2.52094	2.5801	5.83057	5.01839	4.94346
1.04248	-0.588123	-1.29222	3.56158	2.74967	3.38791
4.95967	3.33047	3.41623	5.3648	4.55334	4.13802
2.75247	1.12423	0.769825	4.64404	3.83354	4.27126
0.793872	-0.834284	-0.857657	5.70613	4.8958	4.85281
2.46621	0.840904	0.506482	1.58596	0.777279	0.415013
4.91087	3.28677	0.227151	4.21903	3.41164	3.68738
5.61494	3.99137	4.09781	4.29316	3.48588	3.07329
5.10828	3.48607	3.5561	3.17948	2.37219	2.80708
5.3301	3.70808	3.39886	3.49972	2.69255	3.21584
4.96396	3.34278	3.25924	5.76453	4.95829	4.62926
5.25129	3.63059	3.71405	5.49259	4.68646	4.88113
-0.508832	-2.12764	-2.15102	6.18455	5.37856	5.3464
5.93346	4.32246	4.11878	5.15053	4.34515	3.72484
4.76116	3.15224	3.18569	3.62406	2.82107	3.15991
2.82156	1.21318	0.807468	1.75396	0.950974	1.17103
3.6547	2.04649	1.42255	5.20351	4.40116	5.06868
2.05049	0.444349	-0.153654	6.69002	5.88768	6.03724
3.41636	1.8106	0.709399	5.63002	4.82836	5.55973
5.9386	4.33476	4.41468	3.97974	3.1781	4.23505
5.11003	3.50844	3.51033	7.39848	6.59698	6.89276
4.61204	3.01352	2.15171	5.21594	4.41631	4.51237
3.44631	1.84813	1.04658	3.98737	3.18814	2.74321
6.61937	5.02127	4.45965	2.98326	2.18521	1.82141
3.92206	2.32472	1.84515	4.34303	3.54554	3.87427
3.20213	1.60683	1.10942	5.82398	5.02707	4.93386
6.64712	5.05244	4.74293	3.23897	2.44208	3.45489
4.57451	2.98241	2.83087	4.71859	3.92205	4.52664
3.35163	1.76197	0.993572	5.03069	4.23481	4.39465
0.958986	-0.630635	-2.14233	3.9858	3.19032	3.50885
3.33766	1.74844	1.29408	4.61753	3.82283	3.39892
3.20708	1.61827	1.49934	2.61937	1.82492	2.45176
4.1165	2.5294	2.21508	5.34285	4.54846	4.65125
2.3174	0.730928	-0.324783	0.0725063	-0.72108	-1.20677
3.40444	1.81948	1.8284	5.97846	5.18497	5.26746
4.73011	3.14607	3.15613	7.97811	7.18566	7.19206
3.75334	2.16959	1.52508	3.13601	2.34364	2.43879
3.33433	1.75075	1.63494	3.88571	3.09448	3.56896
6.55609	4.9733	4.79845	4.74656	3.95591	4.19475
5.41449	3.8348	3.33936	4.53629	3.74725	3.82929
5.07545	3.49844	3.14246	3.8881	3.1003	2.71773
4.90377	3.32842	3.20835	2.58458	1.79801	2.12092
7.10476	5.53317	5.22516	9.24201	8.45565	8.52725
3.64674	2.07606	0.771881	3.90937	3.12308	3.64835
1.81216	0.242715	0.00387298	7.26986	6.48366	5.81317
4.73694	3.16765	2.51144	6.77734	5.99165	5.99352
5.40961	3.84222	3.85247	5.31195	4.52783	5.08017
2.26682	0.70177	0.307345	4.75465	3.97058	3.37743
3.60897	2.0447	2.10544	2.378	1.59425	1.3761
3.06766	1.50421	0.665021	2.65504	1.87213	2.58553
1.6132	0.050312	-0.830299	3.04843	2.2657	2.78755
3.96745	2.40685	2.09188	3.56843	2.78575	3.25356
3.39225	1.83291	1.18263	6.23515	5.45254	5.4723
8.88354	7.3248	7.1016	4.69512	3.91304	4.4327
2.85861	1.301	-1.58824	2.18106	1.39924	1.70447
5.45868	3.90201	3.8093	2.64216	1.86058	2.08649
1.37004	-0.186464	-0.320201	3.71392	2.93339	3.72379
0.401583	-1.1534	-1.99259	6.15353	5.37371	5.73924
0.915611	-0.639317	-0.831742	7.34012	6.56042	6.56513
5.54943	3.99871	3.27856	4.46227	3.6826	3.69446
3.10917	1.55936	1.17573	5.48559	4.70605	4.20609
4.46851	2.91902	2.94453	5.27186	4.49283	4.70006
4.08302	2.53377	1.11903	7.01804	6.23902	6.42486
8.37091	6.82805	6.41088	6.78075	6.00202	6.29442
4.47709	2.9349	2.93292	4.40185	3.62372	3.19031
1.31871	-0.222555	-0.245928	3.56516	2.78873	3.19984
5.52617	3.98538	3.86534	5.01369	4.23848	4.5187
4.95682	3.41765	2.79234	7.87791	7.10279	7.10603
3.25546	1.71884	1.2174	2.41785	1.64347	2.25705
5.47948	3.94368	3.77579	6.82071	6.04652	5.61709
5.78857	4.25288	3.7276	1.90782	1.13455	1.56235
3.76212	2.22935	1.10059	7.5681	6.79514	6.85675
1.76209	0.230071	-0.900054	1.60987	0.837508	1.78536
3.56186	2.03215	1.22715	3.85242	3.08014	3.3664
6.04561	4.51723	4.28189	4.90052	4.1283	3.46894
7.59803	6.07065	5.48656	2.24978	1.47799	1.75744
3.12888	1.60558	0.793042	4.77304	4.00221	4.35462
5.87395	4.35143	4.04445	3.90656	3.13597	3.4198
3.12356	1.60351	1.5962	3.78732	3.01743	3.23096
3.18062	1.66379	0.147423	1.97962	1.21092	1.95592
3.00326	1.48921	1.41074	3.8782	3.11008	3.18409
2.41575	0.906166	0.380007	5.74341	4.97564	4.99111
4.67295	3.16432	2.14105	5.28791	4.5204	4.71464
6.24408	4.73657	3.94124	3.72808	2.96074	3.21317
3.27494	1.76897	0.725885	4.03259	3.26545	4.20449
3.61719	2.11149	1.82742	2.18355	1.41681	2.04807
3.60218	2.09755	1.4001	4.30242	3.53637	3.46476
5.31101	3.80903	3.06007	6.10068	5.3349	6.05405
5.98441	4.48298	4.45908	7.34516	6.58089	6.49467
			4.35438	3.59117	4.09087
			2.39642	1.63348	2.56988
			7.08362	6.32164	6.4929
			8.93863	8.17682	8.29864
			4.8605	4.09871	4.14526
			7.33239	6.57132	5.86352
			5.31976	4.55911	4.79326
			4.00625	3.24594	2.58607
			3.98141	3.22196	3.42092
			7.44329	6.68455	6.27431
			5.72168	4.9637	4.99904
			5.40349	4.64622	5.11297
			5.22141	4.46446	4.63305
			3.06952	2.31302	2.57167
			4.11986	3.3642	3.57678
			4.78071	4.02562	3.30989
			2.97472	2.22078	2.18704
			6.6562	5.90226	5.62477
			2.99515	2.24147	1.97383
			4.58281	3.82917	4.08122
			3.96746	3.21499	3.26136
			2.69305	1.9407	1.69654
			2.28709	1.53562	2.39848
			3.15926	2.40803	2.61898
			3.74144	2.99037	2.75128
			4.41198	3.66103	3.89658
			2.15729	1.40663	1.09169
			3.58362	2.83365	2.7074
			5.88832	5.13857	4.49262
			5.95042	5.20068	5.25389
			1.0524	0.303395	0.30982
			5.42301	4.67408	4.80512
			4.42588	3.67715	3.9829
			5.68182	4.93309	4.98969
			7.54528	6.79663	6.95658
			3.72693	2.97873	3.36331
			3.69748	2.94958	3.53857
			3.99975	3.25232	3.47529
			2.41202	1.66476	1.28112
			4.64552	3.89832	4.04799
			4.26594	3.51877	3.94539
			2.77921	2.03268	2.33433
			5.64404	4.89767	5.18467
			2.59398	1.84766	2.09771
			4.01037	3.2642	3.01471
			5.4449	4.69997	4.86191
			6.59545	5.8508	6.29775
			6.54622	5.8016	5.16066
			6.08889	5.34444	4.82083
			2.78127	2.03768	1.91365
			5.66807	4.92476	5.15624
			3.3641	2.62109	3.70967
			4.3962	3.6533	3.09597
			6.86729	6.12574	7.21531
			6.14722	5.40614	5.65962
			2.86261	2.1218	1.91398
			2.50095	1.7603	1.99453
			3.72182	2.9823	3.41249
			3.93185	3.19387	3.34764
			3.14131	2.4037	2.75581
			6.33395	5.59663	5.66811
			4.75234	4.01502	3.56997
			4.86498	4.12784	3.98793
			5.83227	5.09562	5.1271
			4.33134	3.59493	2.85511
			5.40829	4.67203	4.73075
			5.16164	4.42777	4.38612
			5.90646	5.17466	5.25797
			2.39664	1.66596	1.56847
			6.01764	5.28739	4.65911
			2.14916	1.41894	0.706112
			5.5874	4.85758	5.34838
			5.65	4.92044	4.95435
			4.74549	4.01668	4.6508
			3.29999	2.57124	2.73772
			3.6225	2.89388	3.24222
			1.48288	0.754327	0.0174349
			6.99695	6.2687	6.26724
			6.11018	5.38224	4.8171
			0.52843	-0.199507	-0.235279
			6.11834	5.39263	5.76286
			7.53581	6.81043	7.03597
			6.1323	5.40809	6.04745
			5.81781	5.09386	4.90979
			5.51864	4.79541	5.34486
			6.55262	5.82964	5.82338
			6.00917	5.28648	5.32663
			8.04036	7.31786	7.30542
			3.09589	2.37343	3.13753
			5.0191	4.29688	4.09542
			7.27284	6.55066	6.4978
			6.31493	5.59402	5.39634
			4.39588	3.67526	3.68038
			4.92201	4.20149	3.65497
			4.93216	4.21195	4.12092
			3.68431	2.96489	2.90798
			7.04753	6.32857	6.58903
			6.25896	5.54038	5.27443
			3.19297	2.47467	1.90368
			4.18378	3.46558	3.35084
			4.04418	3.32635	3.40077
			4.32582	3.60832	3.89721
			1.73762	1.02077	0.686355
			5.72723	5.01074	4.46059
			3.92729	3.2109	3.38324
			4.95177	4.23581	3.8079
			6.86683	6.15258	6.40024
			4.47101	3.75743	3.46739
			4.33082	3.61847	3.89469
			3.05622	2.34403	2.73037
			3.27866	2.56657	2.39428
			3.99852	3.28646	3.055
			3.68835	2.97774	2.97043
			6.71004	6.00034	6.12218
			5.64908	4.93948	5.30594
			4.94883	4.24021	4.53619
			4.45961	3.75124	3.38911
			1.59432	0.886086	1.71089
			4.25559	3.54793	3.05555
			3.92743	3.21979	4.26701
			2.12743	1.4199	0.742938
			0.883851	0.176458	1.22743
			4.78643	4.0806	3.95852
			3.80557	3.10278	2.5556
			1.76037	1.0578	2.464
			1.08585	0.383481	0.0122518
			5.08139	4.37939	4.36304
			2.92699	2.2257	2.23608
			6.37618	5.67499	5.68067
			6.52125	5.82027	6.04614
			4.31226	3.61146	4.24283
			3.49004	2.78936	3.22061
			4.06831	3.36924	3.53667
			3.3296	2.63119	3.21338
			3.62434	2.92604	3.64681
			6.27928	5.58123	5.61198
			4.49212	3.79428	3.91928
			2.45978	1.76281	2.56472
			4.54115	3.84437	3.9769
			5.62337	4.92684	4.63829
			3.69927	3.00379	2.83204
			3.52889	2.83361	2.03178
			6.32009	5.62495	6.24896
			3.17358	2.47913	2.29606
			2.98222	2.28883	2.37285
			3.41162	2.71829	2.51894
			7.9098	7.21676	7.55856
			5.64802	4.9554	4.93327
			1.81894	1.12767	2.09618
			6.13693	5.44598	5.7195
			4.29131	3.60058	3.748
			4.28491	3.59426	4.048
			6.2738	5.58384	5.83378
			7.23689	6.54726	6.52782
			5.19726	4.50918	4.3866
			5.66583	4.97802	4.66652
			2.53675	1.85004	1.57755
			8.42078	7.73422	7.5056
			6.39269	5.70659	5.85312
			6.40781	5.72233	5.85371
			2.24937	1.56466	1.34142
			3.33417	2.64955	2.54019
			8.07436	7.39039	7.40722
			2.85164	2.16805	2.495
			4.16441	3.48082	3.44763
			4.62143	3.93785	4.28391
			5.04929	4.36579	4.53993
			2.21359	1.5301	1.22419
			4.16268	3.47925	2.92951
			2.46317	1.78103	1.79348
			5.29395	4.61269	4.25576
			2.55143	1.87123	2.22124
			3.59816	2.91892	3.34837
			7.57713	6.89797	6.55035
			2.73287	2.05555	2.05039
			3.61188	2.93461	2.20075
			5.92272	5.24577	5.66766
			3.44564	2.76881	2.67105
			1.70188	1.02514	0.732416
			4.4232	3.74665	3.86403
			5.92405	5.24778	5.65637
			4.68505	4.00941	4.27976
			5.68962	5.01467	4.78313
			6.16289	5.48799	5.91503
			5.93692	5.26292	6.00836
			1.72224	1.04865	0.665021
			3.82832	3.15488	3.16426
			6.33297	5.65978	5.83039
			6.07792	5.40481	5.4782
			3.12325	2.45079	2.7472
			2.47509	1.80283	1.07627
			4.42968	3.75931	3.82332
			2.98563	2.31543	2.21753
			5.72668	5.05665	5.72194
			1.84628	1.17638	1.40541
			6.63636	5.96651	6.14638
			5.05525	4.38568	4.70646
			2.83566	2.16636	2.74419
			5.79218	5.12318	5.36622
			1.71755	1.04865	2.1381
			3.81668	3.14889	3.41639
			2.70944	2.04263	1.7406
			4.8375	4.17111	4.01683
			3.64506	2.97879	3.25406
			3.82351	3.15754	3.68378
			4.32724	3.66236	3.8622
			5.80338	5.1386	4.8956
			3.68159	3.01782	4.34035
			7.17439	6.51223	6.75292
			3.43352	2.77142	3.49327
			6.61034	5.94848	5.82947
			2.76647	2.10491	2.46681
			7.65438	6.99364	6.74843
			6.05938	5.39873	5.45935
			-0.452509	-1.11314	-0.318744
			4.8674	4.20782	3.96324
			4.91131	4.25229	3.71804
			2.67907	2.02015	1.30481
			3.54387	2.88562	2.79472
			6.12768	5.46969	5.54855
			6.95303	6.2954	6.3896
			5.98724	5.32993	5.59919
			4.0387	3.3816	3.30033
			6.04005	5.38315	4.56722
			4.21507	3.55828	3.79311
			1.74179	1.08523	0.666035
			5.2195	4.56312	4.44707
			5.57566	4.9196	4.84817
			4.19909	3.54314	3.78433
			2.18223	1.52697	0.893293
			2.28783	1.63274	2.502
			2.86012	2.20554	1.98472
			1.49117	0.836872	1.50503
			4.338	3.6838	3.17347
			6.30227	5.64994	4.93361
			4.74836	4.09622	3.40997
			4.96885	4.31714	4.69934
			2.35009	1.69859	2.5052
			4.33247	3.68118	3.7392
			2.62933	1.97854	2.24484
			2.62727	1.97728	1.93333
			3.28255	2.63308	2.64676
			4.11885	3.46967	4.06
			4.45384	3.80615	3.03864
			4.74575	4.09813	4.27149
			5.43243	4.78511	5.10278
			6.77187	6.12469	6.03857
			4.06505	3.41805	2.66457
			6.62452	5.97804	6.02002
			5.21284	4.56768	4.07434
			4.75397	4.10973	3.73515
			5.6108	4.96727	4.87253
			5.24184	4.59999	5.12492
			4.20518	3.56412	3.28348
			5.07169	4.43084	4.301
			2.34896	1.70896	1.51114
			5.19618	4.55652	4.4964
			3.00849	2.36966	3.08477
			6.06436	5.42612	5.00242
			3.47177	2.83425	3.32038
			2.45257	1.8152	2.85631
			6.31405	5.67771	6.04299
			5.57828	4.94236	5.33494
			3.18009	2.54423	3.01214
			4.47814	3.84247	4.037
			5.20835	4.57432	4.51265
			6.72212	6.08811	6.04345
			7.13205	6.49824	6.54576
			2.4252	1.79228	3.17939
			4.15601	3.52363	3.5348
			1.1098	0.478511	0.814999
			6.8224	6.19154	6.34669
			1.90526	1.2752	1.47481
			4.3735	3.74411	4.22032
			3.24276	2.61345	3.20303
			5.81094	5.18181	5.19698
			5.99349	5.3649	5.61823
			5.02384	4.39531	4.01607
			3.87825	3.25017	2.765
			1.86487	1.23703	1.3057
			3.32272	2.69492	2.13161
			6.46856	5.84203	6.18108
			6.13589	5.50987	5.52007
			3.79874	3.17332	3.10681
			3.82845	3.20363	2.77379
			3.04318	2.42001	2.41102
			4.37892	3.7558	3.5747
			3.01552	2.3925	2.5404
			5.41616	4.79314	4.6713
			4.80375	4.18138	3.47876
			5.4374	4.8152	4.77498
			5.97323	5.35113	5.70329
			2.79792	2.17628	2.21334
			0.744937	0.123408	0.852724
			2.99536	2.37428	2.97824
			2.08901	1.46822	2.02581
			3.91445	3.29483	2.68323
			4.21201	3.59281	3.9696
			2.44524	1.82609	2.58815
			5.84698	5.22808	5.23033
			3.92014	3.30181	3.25941
			3.2298	2.61149	2.10274
			4.94421	4.32615	5.20624
			3.898	3.28	3.18408
			4.6939	4.07599	3.50996
			3.20037	2.58256	2.98108
			2.79209	2.17623	2.52495
			6.14368	5.52788	5.344
			3.99044	3.3756	3.07139
			3.71549	3.10284	3.30729
			3.34979	2.73749	2.95417
			5.22636	4.61452	4.42654
			7.53732	6.92572	6.82394
			5.93571	5.3245	5.52574
			2.89573	2.28511	2.80208
			6.00221	5.39234	5.44793
			5.7376	5.12779	4.85277
			6.51926	5.91031	6.31082
			7.09729	6.48863	6.67099
			4.62465	4.01605	3.69136
			6.33737	5.73013	6.15407
			5.0389	4.43397	4.54145
			6.59865	5.99378	6.11634
			5.15254	4.54846	4.52873
			3.32076	2.71834	3.12992
			6.54962	5.94797	5.39115
			6.33605	5.73484	5.72902
			2.48443	1.88359	1.44398
			3.55604	2.95549	3.13493
			8.46724	7.86779	7.72386
			3.23586	2.63756	3.38648
			4.57613	3.978	4.44585
			4.65933	4.06131	4.31239
			2.93949	2.34175	2.07573
			5.53255	4.93504	4.66738
			2.84198	2.24484	2.30682
			2.76055	2.16363	2.38348
			2.53299	1.93632	1.20249
			4.49602	3.8994	3.77637
			3.83302	3.23684	3.44667
			4.22798	3.63183	3.59958
			5.07547	4.47964	5.06455
			5.40765	4.81199	4.95903
			3.92888	3.33372	3.10897
			5.57023	4.97572	5.04693
			6.87791	6.28385	6.59015
			5.12264	4.52884	4.79157
			2.92844	2.33482	1.56466
			5.14725	4.55406	4.66076
			8.34728	7.75457	7.77673
			3.50457	2.91197	2.65136
			5.40162	4.80993	4.43745
			3.78655	3.19538	3.32525
			4.775	4.18399	4.03326
			2.46875	1.87799	1.52873
			5.15918	4.56849	4.03548
			4.81864	4.22808	4.40415
			4.5533	3.96315	4.20413
			4.34609	3.75661	3.63106
			3.71425	3.1256	3.04647
			6.28732	5.69886	5.15122
			4.48647	3.89809	4.87353
			4.06431	3.47672	3.88554
			4.59154	4.00398	3.73878
			0.237576	-0.349468	-0.982565
			5.4306	4.84436	4.83748
			5.56052	4.97438	6.05724
			2.71886	2.13283	1.60248
			5.53428	4.94826	4.56821
			8.69895	8.11301	8.54723
			2.76968	2.18525	1.49846
			3.80646	3.22341	3.72357
			2.73209	2.14907	1.7196
			5.48286	4.90052	4.99189
			7.55198	6.96998	6.88105
			2.42547	1.84444	2.55817
			5.57441	4.99379	5.08008
			4.08848	3.50894	3.12701
			3.61869	3.03946	2.32539
			5.66334	5.08427	5.52227
			4.06863	3.49027	3.4508
			6.91488	6.33693	6.4433
			4.99635	4.41864	4.27225
			3.5051	2.92809	2.89449
			7.18982	6.61294	6.86012
			3.4448	2.86816	2.35191
			6.05857	5.48211	5.75752
			4.23014	3.65439	3.41177
			7.0051	6.42936	6.32484
			4.48608	3.91069	3.9052
			2.72703	2.15253	2.30156
			4.75682	4.18447	4.44017
			2.20032	1.62802	1.69933
			3.83762	3.26572	4.1777
			5.97221	5.40037	4.86199
			7.55615	6.98443	7.41871
			5.4241	4.85254	4.93785
			1.2811	0.709815	1.44636
			3.63151	3.06064	2.53946
			2.4774	1.90676	1.80899
			5.11771	4.54716	4.42195
			4.28742	3.71711	4.54877
			2.65607	2.08594	4.03713
			4.73916	4.16913	4.38016
			5.5692	4.99919	4.72466
			2.78296	2.21299	1.71668
			4.54398	3.97405	3.32059
			7.34239	6.77254	6.60986
			2.99126	2.42167	1.58815
			2.318	1.74872	1.2046
			-2.03276	-2.60157	-2.14088
			-2.04289	-2.61171	-0.963463
			0.957108	0.388291	2.18548
			6.52718	5.95844	6.21572
			4.64748	4.07887	4.40849
			4.83781	4.26935	4.76405
			3.19131	2.62348	2.35228
			3.86496	3.29789	3.43301
			5.95214	5.38528	5.31607
			6.15975	5.59356	5.7749
			3.96714	3.40136	2.7294
			4.8625	4.29678	4.44175
			2.43717	1.87218	2.18962
			4.83909	4.27455	4.4043
			2.42281	1.85851	0.92907
			2.74849	2.185	2.162
			1.43287	0.869404	0.938925
			3.3441	2.78136	2.92531
			4.80571	4.24385	3.73253
			3.46006	2.89912	3.18645
			5.23133	4.67119	4.43378
			3.82394	3.264	2.62959
			5.64828	5.08862	5.20751
			5.55216	4.99271	5.07358
			2.83825	2.27905	2.12249
			6.14698	5.58813	5.46935
			4.65518	4.09662	3.87949
			4.42092	3.86314	3.98075
			4.54703	3.98962	3.80006
			2.19476	1.63763	2.48592
			5.47645	4.9198	4.78951
			1.02076	0.464296	-0.28961
			4.02035	3.46418	3.56902
			-1.05653	-1.61171	-0.982565
			3.81181	3.25683	3.83566
			6.16828	5.61332	5.34245
			2.79756	2.2433	3.47549
			6.2883	5.7342	5.45954
			4.34462	3.7928	4.34954
			5.11438	4.56401	4.96732
			4.5726	4.02229	3.33558
			2.87319	2.32307	2.9214
			0.595603	0.0455763	1.81682
			5.31747	4.76873	4.9015
			2.31103	1.76302	1.34597
			4.23673	3.69126	4.22265
			3.65324	3.10782	2.97199
			5.08101	4.53577	4.74021
			3.20424	2.65951	3.20824
			1.15178	0.608384	2.92122
			7.67537	7.13204	7.24425
			6.43843	5.89567	5.45524
			4.14211	3.59953	2.74695
			2.17978	1.63826	1.97799
			-1.17598	-1.71739	0.647542
			-0.522371	-1.06378	-0.283811
			0.251626	-0.289781	0.524417
			2.27088	1.72962	1.87469
			5.74893	5.20776	5.56516
			4.65688	4.11624	4.27611
			2.23938	1.69881	2.00135
			7.66715	7.1266	7.47979
			8.20599	7.66637	7.9914
			3.95329	3.41437	3.55035
			3.88709	3.34859	3.26218
			2.58284	2.04526	1.4513
			2.44774	1.91025	2.08735
			4.22271	3.68603	4.34009
			6.5019	5.96553	6.34517
			2.2189	1.68289	1.4179
			3.51682	2.98094	3.33325
			4.51269	3.97693	3.38227
			4.59007	4.05572	3.83613
			5.43239	4.89814	4.70666
			5.11158	4.5775	4.16557
			4.83447	4.30068	3.57238
			4.27958	3.74599	3.80793
			3.75247	3.2193	3.03455
			2.372	1.8403	1.1627
			2.95691	2.42563	2.09543
			7.26153	6.73146	6.75388
			1.57882	1.04887	0.185475
			3.90526	3.37572	3.23892
			5.42444	4.89544	4.03087
			4.35534	3.82664	3.60466
			1.04456	0.516028	1.03956
			5.89072	5.36256	5.5491
			2.31047	1.78241	2.97921
			4.88972	4.36207	3.92612
			4.03721	3.50974	2.80552
			4.41098	3.88352	3.07788
			5.35429	4.82824	5.52008
			5.53582	5.01003	4.05551
			1.56972	1.04408	2.22212
			2.14994	1.62447	0.842812
			3.20944	2.6842	2.84864
			5.633	5.10793	5.04145
			3.04629	2.5216	2.20186
			3.99473	3.47097	2.52018
			2.58392	2.06016	1.25089
			4.97527	4.45178	4.3843
			1.96922	1.4473	0.511002
			4.61249	4.09068	4.01868
			5.28657	4.76486	4.63173
			7.08558	6.5639	6.43602
			2.4476	1.92598	1.08585
			3.61461	3.09304	4.4429
			5.07109	4.54961	5.33846
			3.1438	2.62326	2.48003
			5.26181	4.74135	4.54994
			3.53784	3.01749	2.63557
			3.61575	3.09776	2.22278
			3.64772	3.12985	2.20732
			4.41024	3.89251	3.45
			6.67483	6.15726	5.37091
			5.2704	4.75362	4.98957
			3.61879	3.10233	2.58607
			4.48311	3.96709	4.22969
			5.65162	5.13579	5.40261
			3.31058	2.79679	2.24959
			5.91708	5.40508	6.06883
			4.49409	3.98232	4.19508
			2.50217	1.99066	2.96298
			3.62169	3.11045	3.53908
			5.88807	5.37695	5.57213
			-0.563106	-1.07204	0.136197
			6.07843	5.5706	5.95272
			2.34677	1.83992	1.45543
			1.48668	0.980025	0.942189
			3.27442	2.76854	2.80314
			4.88963	4.38392	4.41083
			4.26534	3.75997	3.97426
			1.92708	1.42208	1.56179
			4.76801	4.26304	3.74744
			2.63641	2.13179	2.32257
			3.42182	2.91833	3.78308
			5.68145	5.17799	5.46388
			3.01191	2.50854	2.73985
			2.13578	1.63297	1.67992
			4.84417	4.34142	3.67641
			4.68263	4.18046	4.24315
			1.65712	1.1552	1.18706
			4.04156	3.54004	4.07899
			4.2712	3.7697	3.81986
			4.22	3.72025	3.66935
			4.28823	3.78889	3.73115
			5.07762	4.57829	4.4006
			4.40071	3.90147	3.88841
			3.67296	3.174	3.13177
			5.47875	4.97995	4.8431
			4.97082	4.4722	5.2252
			3.56754	3.06921	2.9995
			5.22971	4.73151	4.81365
			4.51313	4.01538	4.30163
			1.5924	1.09509	1.76704
			4.41439	3.91753	3.37735
			4.3605	3.864	4.87397
			2.01826	1.5223	1.40182
			3.84987	3.35451	2.83182
			4.15219	3.65757	2.89107
			4.88252	4.38812	4.38552
			4.08835	3.59401	3.36332
			3.31646	2.8226	2.45676
			6.22663	5.73339	5.89505
			2.74286	2.24979	2.24237
			2.6603	2.1679	2.9488
			2.82724	2.3349	2.81105
			3.73449	3.24334	3.75911
			3.01122	2.52045	2.57951
			2.04167	1.55184	1.66519
			4.57425	4.08484	3.66456
			4.23972	3.75074	3.04179
			7.43236	6.94392	6.8563
			4.63907	4.15078	4.23758
			3.47662	2.98849	2.04665
			4.44586	3.95808	4.09172
			2.47877	1.99131	1.06079
			6.08571	5.59842	5.82065
			1.28924	0.802425	0.932595
			3.86933	3.38262	4.02455
			3.58701	3.10041	2.80108
			4.39075	3.90419	4.18443
			5.01437	4.52794	4.37661
			9.50161	9.01533	8.9951
			6.9874	6.50141	6.44665
			5.21157	4.72742	4.03587
			4.47085	3.98717	3.81804
			4.78313	4.29974	3.96674
			4.37636	3.89307	3.61736
			2.78659	2.30394	1.43092
			4.79242	4.31007	4.3888
			4.98939	4.50767	4.40034
			2.61572	2.13418	1.91994
			5.43047	4.94894	5.31843
			5.36895	4.88761	4.21714
			2.86819	2.38846	3.19592
			5.08785	4.6083	4.28007
			7.4996	7.02019	7.13383
			3.51078	3.03139	3.12604
			2.67144	2.19263	1.23342
			3.00448	2.52588	2.622
			7.1473	6.66988	6.77574
			3.40585	2.92919	2.71491
			4.20451	3.72828	3.47723
			4.20049	3.72427	4.4816
			7.96988	7.49394	7.76588
			3.24403	2.7687	2.45962
			3.43139	2.95612	2.55974
			10.6221	10.1479	10.2536
			6.90503	6.43085	6.35955
			4.97714	4.50477	4.93752
			2.80434	2.33214	3.1865
			4.18481	3.71327	3.74438
			6.5152	6.04382	6.66648
			4.24406	3.77269	3.85213
			4.32277	3.85198	3.69193
			2.39798	1.92745	1.32958
			5.73369	5.26327	5.39077
			4.01193	3.54163	3.18164
			3.78392	3.31396	3.24547
			4.99663	4.52724	4.21123
			1.7864	1.31812	0.995273
			5.03549	4.56724	5.06044
			5.49974	5.03202	6.29377
			3.71848	3.25193	2.88033
			4.15476	3.68837	4.21656
			3.27343	2.80787	2.02405
			4.01204	3.54664	3.42344
			3.69181	3.22723	2.20351
			3.82986	3.36535	4.39534
			6.49221	6.02875	6.50879
			1.52529	1.06191	0.975345
			6.57671	6.11335	6.5036
			4.2407	3.77754	4.27161
			2.58412	2.12176	1.93496
			0.495848	0.0343271	-0.345557
			8.34672	7.88617	8.14856
			4.2717	3.81216	3.52616
			6.14231	5.68303	5.81227
			3.03007	2.57189	2.93233
			4.56555	4.10769	4.78822
			5.59746	5.14035	5.16801
			6.14405	5.68725	5.12435
			3.73547	3.28009	2.75041
			4.54747	4.09214	4.54801
			4.24135	3.78738	3.48661
			10.0321	9.57892	9.38934
			3.03307	2.57999	2.37165
			1.6997	1.24767	1.78918
			2.6512	2.19918	3.02269
			3.65093	3.20012	2.68477
			6.28784	5.83735	5.86632
			3.73451	3.28481	3.60072
			3.43359	2.98412	3.30496
			4.40558	3.95624	3.06079
			3.92219	3.47355	2.67721
			5.4904	5.04197	5.21994
			4.73052	4.28217	4.59042
			2.7598	2.3117	1.96237
			4.45119	4.00439	3.55228
			4.65282	4.20632	4.44907
			3.16477	2.7183	2.99759
			4.17427	3.72796	3.59438
			5.6778	5.23152	5.28383
			5.92844	5.48246	5.47825
			2.83621	2.39028	2.79461
			3.56521	3.11931	2.841
			0.327527	-0.118291	1.13504
			5.37957	4.93412	4.79696
			3.21391	2.7692	2.14258
			2.94987	2.50526	2.69221
			2.56731	2.12309	2.49198
			3.59233	3.14875	3.1602
			3.45537	3.01218	2.31218
			6.79035	6.34778	6.72921
			4.5879	4.14577	3.71136
			4.72343	4.28163	3.82054
			4.37886	3.9375	3.55871
			5.17573	4.73443	3.8547
			1.09401	0.653635	1.46783
			2.73148	2.29275	2.21962
			3.79474	3.3565	2.37392
			3.76435	3.32621	4.14655
			3.93246	3.49455	4.03416
			3.6894	3.25165	3.31057
			3.37854	2.94079	3.3014
			3.70492	3.26868	3.26354
			4.54278	4.10657	3.99744
			6.10404	5.66799	5.8143
			3.99947	3.56346	3.75535
			1.41321	0.977744	0.622381
			6.14632	5.71091	5.93552
			3.89473	3.45938	3.53071
			5.49387	5.06003	4.26621
			4.00077	3.56737	3.30746
			2.17484	1.7415	2.17657
			6.72318	6.29042	6.16346
			4.44054	4.00805	3.71637
			5.56183	5.1297	5.24942
			3.97405	3.54207	3.86889
			4.50311	4.07199	3.83392
			9.25472	8.82522	8.85832
			3.00442	2.57548	2.24646
			5.38782	4.96011	5.14858
			2.78956	2.36221	2.32591
			5.2841	4.85871	4.65277
			3.75765	3.33278	3.0022
			4.39493	3.97059	3.63698
			6.48934	6.06515	6.1921
			4.88075	4.45749	4.68755
			4.95327	4.53002	4.7499
			2.77981	2.35674	2.48021
			4.63035	4.20829	4.31745
			5.06998	4.64794	4.27856
			6.41223	5.9913	6.31307
			3.34275	2.92224	2.76331
			3.98671	3.56642	3.95263
			3.96348	3.5432	3.7362
			4.04492	3.625	4.39426
			4.61987	4.19997	4.51329
			7.21483	6.79685	6.66727
			4.79505	4.37811	4.39356
			7.58296	7.16667	7.36204
			3.74431	3.32815	4.22859
			2.71378	2.29766	2.37002
			3.07362	2.65932	3.24587
			4.2548	3.84084	3.35973
			4.9179	4.50438	4.09897
			4.19904	3.78556	3.93269
			1.45405	1.0408	0.409572
			4.26751	3.85445	3.48999
			6.96219	6.54933	5.90084
			7.78629	7.37347	7.42057
			2.75896	2.34712	2.60006
			2.16357	1.75191	2.08724
			2.50334	2.09186	1.87335
			4.43009	4.01954	3.5953
			3.30587	2.89786	3.12799
			6.27182	5.86501	5.64074
			2.11279	1.7062	2.13611
			4.68469	4.2788	3.71718
			5.12417	4.71942	4.59548
			4.7524	4.34798	4.12737
			4.88884	4.48459	4.21777
			5.63993	5.2358	5.20479
			2.64934	2.24546	2.87503
			4.08804	3.68501	4.03441
			2.89594	2.49306	2.273
			2.36583	1.96619	2.89768
			9.27968	8.88005	9.10092
			3.56839	3.16916	2.68194
			1.72285	1.32388	1.89273
			4.63362	4.2349	3.52017
			3.74849	3.34998	3.72336
			5.81141	5.41352	5.71748
			1.69013	1.29231	1.54716
			2.97045	2.57318	2.21718
			5.73972	5.3432	4.756
			5.08068	4.68426	5.3079
			4.92464	4.52847	5.05679
			2.18248	1.78865	1.7324
			0.916574	0.523139	0.345536
			3.80086	3.4082	3.62571
			6.28266	5.8905	6.13583
			5.89556	5.50348	5.20246
			3.87537	3.48371	3.57469
			3.95041	3.5591	3.11522
			3.65499	3.2637	3.18191
			5.04123	4.64995	4.55966
			3.41321	3.02371	3.05634
			5.6052	5.21582	4.73646
			6.43976	6.05053	6.32241
			4.09317	3.70397	3.78878
			4.73004	4.3414	4.27822
			3.80214	3.41458	3.67246
			3.53797	3.15057	3.12005
			4.54661	4.16053	4.00653
			8.10801	7.72332	7.80618
			1.73192	1.34773	1.77936
			4.87165	4.48748	5.05723
			6.52431	6.14029	6.32752
			4.58302	4.1993	3.96907
			4.22021	3.83787	3.91374
			5.15838	4.77631	4.80643
			3.26294	2.88162	2.7256
			7.66471	7.28432	7.15013
			4.9593	4.5796	4.31006
			3.6093	3.22996	2.81372
			3.96087	3.58268	3.38973
			7.31957	6.94219	7.49636
			3.91742	3.5401	2.63584
			4.04283	3.66564	4.12888
			4.04979	3.67326	4.0364
			2.65587	2.2796	2.198
			4.73379	4.3598	4.11863
			1.24334	0.870636	0.393021
			3.53339	3.16072	3.25384
			3.24301	2.87144	2.6613
			3.2782	2.9074	3.69566
			3.23498	2.86446	2.27578
			5.60668	5.23668	5.10792
			4.7587	4.38932	4.65294
			5.40116	5.03192	4.94646
			3.14304	2.77416	2.53533
			7.64946	7.28064	7.29671
			6.90002	6.53147	6.3395
			5.76835	5.40242	4.86225
			3.99208	3.62823	3.05599
			6.58264	6.21908	6.57185
			2.47311	2.10995	2.68033
			4.41158	4.0488	3.4994
			3.35136	2.98927	2.26027
			1.79502	1.43325	1.07985
			5.61162	5.25107	4.98599
			5.87753	5.51706	5.57026
			4.94897	4.58942	4.45884
			3.60308	3.24505	2.93439
			5.13285	4.77526	4.62923
			1.29694	0.939518	1.57129
			3.19721	2.84082	2.97191
			5.04754	4.6913	5.19506
			3.55142	3.19698	3.19998
			5.50502	5.15097	4.20638
			3.20442	2.8509	2.51315
			4.88733	4.53402	4.24619
			9.33522	8.98213	9.04289
			5.86589	5.51417	4.8984
			3.80933	3.45804	3.70001
			6.80077	6.45117	6.74071
			9.59684	9.24771	9.43596
			8.0347	7.68637	7.68723
			1.90104	1.55358	2.0397
			4.25951	3.91276	3.92887
			2.99793	2.65119	3.41481
			4.21247	3.86627	4.71154
			3.0868	2.7409	2.51078
			3.9587	3.61329	3.27102
			4.53584	4.19072	4.20742
			2.96728	2.62287	2.87397
			3.36088	3.01695	2.26565
			4.96276	4.61885	5.12385
			4.08938	3.74578	3.174
			5.01941	4.67616	4.68638
			5.06254	4.71977	4.08888
			5.89507	5.55308	5.60542
			5.98793	5.64641	5.72209
			4.00969	3.66962	3.56312
			3.19182	2.8519	3.18949
			3.33876	2.9995	3.50507
			4.15693	3.81792	3.22288
			5.45608	5.11734	5.35165
			5.39757	5.05902	5.2726
			3.60468	3.26641	2.66955
			-0.379098	-0.717001	-0.105545
			5.86388	5.52616	5.44127
			6.74143	6.40604	5.9021
			5.51937	5.18404	5.39106
			1.03084	0.696087	0.673769
			4.75578	4.42147	4.02525
			4.44541	4.11134	4.29387
			5.7522	5.41868	4.99622
			2.31143	1.97864	1.82671
			2.87991	2.54716	3.1092
			1.77758	1.44528	2.17237
			5.16827	4.83633	4.17571
			3.40566	3.07373	2.88558
			3.20569	2.87504	1.99137
			5.63264	5.30211	5.60535
			4.27134	3.94108	4.21348
			3.51912	3.18993	3.20874
			5.76118	5.43213	5.78188
			4.96808	4.6393	5.1038
			2.48176	2.15327	2.5484
			4.57517	4.24772	4.28769
			4.07913	3.75179	2.97872
			6.98685	6.66171	6.59159
			3.86348	3.53841	4.25265
			5.59619	5.27181	5.10435
			4.57066	4.247	4.48118
			5.51048	5.18695	5.29515
			3.80383	3.48057	2.77606
			4.86347	4.5409	4.5339
			3.24158	2.91926	3.29762
			2.37774	2.0555	2.7369
			3.30807	2.98629	2.60138
			6.14207	5.82037	5.90713
			5.09583	4.77423	4.43742
			4.51679	4.19529	4.50737
			3.84029	3.51923	3.64906
			3.07037	2.7503	2.54264
			5.52074	5.20162	5.13194
			6.05471	5.73585	5.51995
			4.77094	4.4525	4.5301
			4.26994	3.95186	3.98582
			4.49762	4.17958	4.51462
			3.90218	3.58431	3.67968
			2.02901	1.71193	1.35371
			8.51495	8.19826	8.05993
			3.33591	3.01939	2.71744
			4.45049	4.13403	4.53514
			3.63981	3.32417	2.66855
			2.35118	2.03569	2.24195
			6.11248	5.79752	6.27761
			3.32072	3.00683	2.52923
			3.70786	3.39428	3.31311
			5.96733	5.65535	5.52408
			1.87199	1.56076	0.583311
			3.87694	3.56605	3.73696
			2.72123	2.41046	1.9427
			4.71662	4.40586	4.4684
			6.42314	6.1138	6.17575
			5.15297	4.84455	4.09481
			1.31364	1.00528	1.52317
			2.33896	2.03157	2.18221
[truncated: 2,503 more rows]

## Sheet: Fig3
Fig 3C				Fig 3D			Fig 3E
rhi 5'	EGFP RNAi-1	0.0691416		Intergenic region	1.07401		Intergenic region	EGFP RNAi-1	0.976585
		0.0933676			0.981039				0.880128
		0.0843324			0.944949				1.14329
	enok RNAi-1	0.0228784		rhi 5'	3.38267			enok RNAi-1	0.585378
		0.0121212			3.08403				0.59598
		0.0160337			2.80353				0.600833
mael 5'	EGFP RNAi-1	0.0960603					rhi 5'	EGFP RNAi-1	1.80319
		0.0897696							1.71728
		0.0840516							2.02778
	enok RNAi-1	0.0588192						enok RNAi-1	1.25539
		0.0457886							1.28896
		0.0484048							1.31307
shu 5'	EGFP RNAi-1	0.101644					mael 5'	EGFP RNAi-1	2.63831
		0.102016							2.42345
		0.0806503							2.65957
	enok RNAi-1	0.0689655						enok RNAi-1	2.71329
		0.0512385							2.9882
		0.0543365							2.78915

## Sheet: Fig4
Fig 4A				Fig 4B
Burdock	Luciferase	0.935744		cl1-A-plus	Luciferase	0.000201072
		1.06406				0.000229906
		1.00019				0.000180798
	enok RNAi-1	2.3944			enok RNAi-1	6.11763e-05
		2.27267				5.08521e-05
		1.999				4.7998e-05
	enok RNAi-2	3.52808			enok RNAi-2	2.76953e-05
		3.80449				2.53674e-05
		2.78979				1.60545e-05
blood	Luciferase	1.04192		cl1-A-minus	Luciferase	0.000202471
		1.04772				0.000246407
		0.91036				0.000194223
	enok RNAi-1	6.65128			enok RNAi-1	4.22702e-05
		6.18058				3.34724e-05
		5.04288				3.20348e-05
	enok RNAi-2	12.2353			enok RNAi-2	2.43621e-05
		12.1675				1.78135e-05
		8.0427				1.24227e-05
rhi	Luciferase	0.885648		cl1-32-plus	Luciferase	0.000406817
		1.06001				0.000396608
		1.05434				0.000357443
	enok RNAi-1	1.04277			enok RNAi-1	0.000156668
		0.922464				0.000150982
		0.928499				0.000128139
	enok RNAi-2	0.668964			enok RNAi-2	0.000109256
		0.660021				8.35693e-05
		0.637427				4.41672e-05
mael	Luciferase	0.876207		cl1-32-minus	Luciferase	0.000498541
		1.03282				0.000498541
		1.09097				0.000496243
	enok RNAi-1	1.06395			enok RNAi-1	0.000517316
		0.989948				0.00053186
		0.999673				0.000477129
	enok RNAi-2	0.840973			enok RNAi-2	0.000316246
		0.88084				0.000246407
		0.794981				0.00014856
BoYb	Luciferase	0.877035		cl2-A-plus	Luciferase	0.00864851
		1.09291				0.00891222
		1.03005				0.00737402
	enok RNAi-1	1.21663			enok RNAi-1	0.0142786
		1.08917				0.0161387
		1.12563				0.0129881
	enok RNAi-2	1.01957			enok RNAi-2	0.0126038
		1.05065				0.0148506
		0.908349				0.0129282
enok	Luciferase	0.809288		cl2-A-minus	Luciferase	0.000784104
		1.13339				0.00080058
		1.05732				0.000813633
	enok RNAi-1	0.20054			enok RNAi-1	0.00131262
		0.213124				0.00154662
		0.204801				0.00124182
	enok RNAi-2	0.236579			enok RNAi-2	0.00112437
		0.262115				0.001148
		0.246203				0.00124469
cuff	Luciferase	0.853462
		1.10623
		1.04031
	enok RNAi-1	1.39929
		1.29684
		1.34597
	enok RNAi-2	1.38913
		1.34407
		1.08775
del	Luciferase	0.939226
		1.04142
		1.01936
	enok RNAi-1	1.2853
		1.18764
		1.14693
	enok RNAi-2	1.25129
		1.31127
		1.20675

## Sheet: Fig5B
ED-SL		EI-SL		RI-SL
GFP_KD	enok_KD	GFP_KD	enok_KD	GFP_KD	enok_KD
-4.48314	-7.97088	-5.23405	-6.24216	-3.19394	-6.12238
-6.24835	-6.65307	-3.39468	-6.49873	-4.10241	-5.26334
-6.70254	-7.57977	-3.475	-5.80947	-5.32602	-6.54905
-4.95345	-6.26334	-4.28581	-5.91031	-2.88952	-5.59277
-3.64615	-6.57593	-2.89792	-5.46792	-4.12268	-7.01176
-3.74116	-6.4222	-5.04855	-7.52598	-2.37514	-4.50491
-1.31805	-5.10716	-4.70418	-6.31592	-6.36068	-6.63693
-3.38336	-4.88831	-4.63481	-7.03526	-2.9808	-6.3143
-5.33534	-6.71813	-5.95688	-6.60896	-5.34579	-7.82275
-3.55647	-4.29824	-4.07804	-6.28367	-3.09191	-6.11091
-3.28045	-4.56346	-4.22256	-5.40731	-4.70791	-6.03006
-2.93695	-4.84175	-5.78195	-7.04687	-4.63137	-4.37789
-3.46731	-4.83724	-3.51533	-5.37186	-3.27195	-6.2727
-2.64151	-4.93058	-6.81925	-7.1912	-4.10323	-6.47871
-3.89439	-7.08734	-4.31657	-7.28228	-3.74613	-3.98123
-4.75513	-7.2346	-4.56612	-5.93129	-4.75216	-6.48593
-3.08231	-5.76264	-2.91374	-6.10903	-2.1514	-4.6127
-5.95092	-7.0987	-4.58995	-5.6505	-4.70411	-6.53216
-4.96833	-5.26559	-5.62237	-5.53449	-2.11889	-4.93058
-4.2858	-5.57638	-4.52315	-6.24273	-4.16066	-5.40832
-3.1528	-5.21677	-6.26137	-6.96632	-5.68095	-4.04174
-4.51544	-5.45056	-4.22463	-7.0558	-3.93276	-6.00457
-2.76133	-5.74457	-3.91777	-5.70931	-4.29076	-5.89382
-5.56473	-5.65708	-4.82888	-5.43992	-4.60672	-5.38987
-2.51006	-5.47278	-3.16092	-5.14721	-5.54182	-5.22758
-6.18872	-5.54503	-4.97883	-6.09177	-1.10242	-4.43395
-4.34344	-6.3897	-6.36677	-6.75867	-3.5798	-4.09145
-1.03557	-1.55616	-3.78088	-5.97645	-3.86437	-5.35454
-1.88886	-4.34681	-6.09165	-6.80986	-4.21456	-5.03271
-3.83766	-6.40527	-2.91257	-5.53169	-4.11525	-4.37117
-0.669771	-4.14599	-4.78732	-5.70601	-5.83678	-5.16833
-3.64966	-5.10841	-4.7996	-5.9327	-5.02828	-5.17538
-3.75923	-5.44858	-5.35588	-5.86448	-3.70958	-4.17132
-4.27621	-5.71887	-0.14741	-3.78586	-5.09686	-6.28533
-4.36364	-5.24557	-4.21822	-6.20761	-5.83347	-5.15819
-2.57586	-2.54881	-2.90574	-5.83573	-3.33524	-4.19855
-5.18292	-6.30098	-4.813	-6.60631	-3.08261	-3.30301
-5.90315	-6.41653	-0.808332	-4.22528	-1.85183	-2.56346
-5.04055	-5.49719	-4.04319	-5.40527	-4.26666	-3.22528
-5.00587	-6.42713	-4.99332	-6.30207	-4.77076	-4.48966
-5.17639	-4.23137	-5.0001	-5.50396	-5.14613	-3.50948
-5.11654	-6.5553	-2.36284	-4.89121	-3.7953	-4.23673
-5.96971	-6.32508	-3.78005	-5.863	-3.89247	-3.88491
-4.13593	-5.08068	-5.89794	-5.90816	-4.11525	-4.73258
-6.18465	-6.71211	-3.5188	-4.78116	-1.49107	-3.68733
-3.68477	-4.63049	-4.78203	-6.10653	-4.88802	-5.9782
-6.04884	-4.665	-2.52068	-5.34085	-3.48968	-4.84639
-5.55631	-4.85758	-5.75816	-5.73177	-3.48917	-3.82016
-5.73601	-4.90529	-3.70369	-5.10466	-3.59116	-5.03141
-4.28191	-5.53872	-2.11334	-3.43594	-4.20774	-5.55505
-5.84732	-4.48967	-4.31964	-7.82285	-4.51254	-3.68062
-4.03557	-4.75787	-3.30418	-6.01958	-2.37566	-4.84325
-5.16956	-6.20722	-5.81937	-7.44747	-3.72439	-4.52575
-6.07249	-4.95515	-3.50695	-4.6722	-5.72138	-5.97333
-4.65934	-5.41069	-2.33016	-5.56164	-5.40785	-5.13449
-5.05672	-5.58826	-4.73188	-6.10716	-4.3727	-5.18555
-3.91434	-4.88976	-6.10337	-6.54582	-2.41678	-3.37476
-6.11134	-4.54846	-4.61309	-5.4419	-3.67581	-3.60122
-4.25189	-5.04043	-5.25545	-5.33659	-4.66783	-5.62196
-6.2347	-5.0448	-4.19795	-4.5106	-5.81576	-4.90601
-3.69243	-6.07574	-3.48095	-6.82266	-4.26031	-5.43864
-4.95838	-6.12798	-4.04379	-4.37602	-5.26468	-5.02424
-3.2276	-3.14356	-4.07362	-6.04492	-2.43391	-4.14599
-4.32472	-4.73366	-3.94251	-4.06982	-3.96559	-4.19371
-5.23768	-6.31044	-4.95995	-4.97987	-4.41525	-5.33124
-5.01985	-6.00047	-2.25481	-5.54457	-4.98107	-4.9758
-6.28089	-6.69441	-5.07595	-5.52165	-2.33875	-3.43594
-4.44879	-6.91134	-3.03557	-3.88101	-3.87452	-4.97782
-4.08306	-4.06725	-4.27015	-5.15328	-5.73979	-5.04393
-5.00286	-5.85838	-3.57577	-4.36769	-4.43867	-4.8896
-4.65709	-4.65507	-4.35847	-6.33552	-4.67336	-6.13015
-6.00445	-6.16593	-4.05267	-5.10778	-6.44152	-4.50023
-6.59216	-5.95543	-3.6134	-4.93622	-5.37696	-5.26964
-3.61789	-4.2116	-4.30458	-5.76185	-5.03557	-4.40426
-5.12492	-5.87854	-4.77101	-5.14721	-4.2939	-4.73757
-4.06405	-5.14829	-4.99023	-6.76026	-2.79727	-3.60213
-5.38322	-4.89491	-6.04557	-5.59834	-3.24675	-3.72266
-3.34304	-6.06498	-4.31982	-7.44611	-3.98579	-2.62955
-4.60769	-4.96883	-3.16687	-6.37977	-2.94342	-3.11105
-2.8898	-2.89017	-4.75099	-5.51407	-5.3478	-5.66258
-4.99354	-5.50879	-4.4771	-6.14599	-0.452498	-1.56492
-1.34966	-4.29495	-3.83887	-4.56529	-5.57461	-5.56997
-4.03651	-4.89069	-5.80358	-5.98328	-4.81158	-3.10344
-3.23899	-3.86105	-3.2708	-6.22873	-2.0936	-1.97116
-4.29213	-5.18381	-2.36798	-4.93199	-2.23448	-4.01404
-1.57586	-2.79501	-5.80488	-6.00188	-2.57586	-3.22758
-6.15108	-4.93411	-3.95708	-4.65478	-3.36226	-2.53626
-2.4309	-5.48702	-5.26822	-7.14071	-3.03936	-4.34903
-1.0118	-4.43594	-4.7263	-7.02372	-4.09599	-2.15056
-4.26023	-3.90037	-2.57586	-3.1557	-4.08708	-3.79353
-4.56104	-3.86696	-4.03051	-5.48194	-4.25084	-3.26967
-2.70739	-3.51422	-3.59834	-5.35644	-3.87423	-3.82346
-5.43749	-6.66815	-3.25578	-5.02488	-4.25744	-4.68519
-4.24732	-4.84149	-5.47386	-5.2781	-3.80702	-4.59199
-4.6792	-5.53115	-5.00504	-6.52024	-2.85858	-2.79299
-4.22993	-6.22551	-3.52928	-4.90745	-2.43045	-3.53329
-5.2014	-5.8259	-6.26137	-5.89236	-0.795473	2.31807
-4.64954	-2.89723	-4.07341	-4.70188	-1.93873	-2.36769
-6.17649	-3.81863	-3.27806	-5.40324	-3.553	-3.36571
-5.12728	-5.63862	-2.03948	-4.93763	-3.72899	-3.75719
-2.65285	-4.47708	-4.51777	-6.14843	-6.58449	-4.90599
-4.9781	-4.15354	-4.8886	-7.86775	-2.93846	-2.2199
-3.78069	-5.19829	-3.26336	-5.23386	-2.0903	-3.93199
-3.96425	-4.33632	-3.21467	-6.38918	-7.44147	-4.95612
-4.62654	-5.05072	-4.79936	-4.67894	-3.38572	-5.21502
-5.76771	-5.46411	-5.01061	-5.47375	-5.26514	-4.72432
-4.34155	-3.79277	-4.50332	-4.9334	-3.08332	-2.93586
-5.76236	-4.23042	-4.44659	-5.49809	-3.58902	-4.45823
-5.72512	-4.73753	-4.17427	-5.50396	-3.45698	-1.71718
-3.66319	-4.96088	-5.53223	-6.24444	-3.09834	-4.08579
-1.92251	-2.79188	-5.87077	-4.99107	-3.95073	-3.89197
-4.58368	-5.87229	-5.01805	-6.15766	-3.36202	-4.8062
-3.01935	-4.70807	-5.40253	-4.56529	-4.52145	-3.80298
-4.50675	-4.30365	-4.89763	-4.56806	-4.93919	-5.09333
-3.99365	-4.08335	-4.69845	-5.17838	-4.41799	-4.88132
-6.32629	-5.22609	-4.5757	-5.02223	-3.36389	-3.84256
-5.13645	-4.6318	-7.18884	-6.0669	-4.83612	-5.15525
-6.37182	-5.51826	-5.63617	-5.03602	-4.73324	-4.39
-0.993094	-3.98369	-3.96542	-4.93481	-4.12655	-3.75772
-3.75315	-3.88393	-3.74613	-3.14599	-2.96631	-3.88934
-4.78556	-3.23673	-4.21478	-5.0711	-5.28775	-3.93422
-4.71367	-5.12718	-3.22804	-5.10591	-2.50057	-2.84404
-5.32154	-5.22787	-2.41115	-4.92917	-3.52333	-3.65216
-5.12011	-4.42066	-2.70251	-5.0711	-0.833057	-1.69397
-1.57592	-2.77855	-3.6281	-5.53542	-5.47757	-4.16099
-4.13234	-5.22947	-3.52815	-4.81101	-4.67806	-5.19519
-4.80776	-5.2727	-4.98938	-6.81216	-4.91439	-4.40362
-5.85221	-5.91534	-4.82744	-5.38969	-2.55489	-1.31831
-4.95263	-5.97219	-5.64044	-6.22707	-5.43898	-4.06876
-3.42589	-2.56346	-3.40934	-3.14112	-2.79233	-3.93622
-2.44037	-3.67894	-4.60981	-7.15093	-2.41541	-2.9156
-5.81144	-5.60147	-2.96045	-3.72933	-3.52815	-4.30081
-5.48953	-6.08632	-3.96861	-4.92775	-5.37031	-4.82148
-3.5599	-4.10508	-4.45179	-5.78664	-2.30788	-3.09197
-2.32539	-4.44101	-2.11936	-3.73096	-4.45036	-3.36571
-6.88033	-5.26127	-3.08422	-4.43594	-2.08311	-2.42985
-4.12238	-2.57262	-5.05747	-5.71393	-4.03821	-3.48209
-3.89527	-5.17871	-3.78732	-4.37186	-2.84522	-3.15695
-4.21746	-5.29177	-6.01061	-5.59767	-2.99477	-2.81404
-2.25302	-3.86622	-5.23453	-4.31068	-3.73341	-4.28772
-3.31266	-3.62518	-4.2344	-5.78742	-3.27201	-4.61999
-3.76528	-4.87275	-5.71058	-5.55958	-3.63356	-4.81932
-1.63905	-4.05952	-2.92251	-4.20006	-3.5887	-3.73715
-3.16994	-1.98095	-2.75114	-4.30261	-3.7059	-5.48696
-5.59645	-4.46215	-5.24945	-5.78429	-4.17225	-4.65295
-5.15729	-2.95657	-3.83143	-6.45423	-4.14115	-4.76214
-5.62293	-5.3288	-4.42872	-6.94341	-1.3121	-2.16833
-4.45909	-5.59748	-3.72255	-4.84262	-4.22847	-4.58732
-3.37702	-3.73142	-5.40253	-4.0274	-2.51543	-3.20838
-4.924	-3.72261	-4.30513	-4.36978	-3.44366	-4.24003
-5.24938	-5.67033	-5.44843	-6.58757	-3.52479	-4.01511
-3.60753	-3.51478	-1.1514	-3.42796	-4.63707	-4.26947
-4.42094	-4.47324	-3.21031	-3.29605	-2.24586	-2.97607
-4.42532	-4.716	-4.91553	-4.93763	-1.98025	-2.742
-5.45876	-3.42121	-3.45049	-4.65307	-0.726461	-1.56584
-2.81026	-2.52524	-5.59892	-6.08544	-3.19076	-2.98766
-4.42768	-3.46968	-2.40109	-2.55616	-5.07129	-4.60368
-4.1735	-6.03764	-1.65832	-3.3048	-2.56182	-2.68794
-4.10692	-5.78513	-6.00234	-6.51648	-3.42887	-4.53345
-5.42613	-5.81558	-5.2585	-4.9632	-4.8364	-4.41035
-5.77536	-5.22323	-4.12019	-5.68504	-3.65458	-4.26287
-4.88069	-6.11531	-5.47493	-5.88082	-3.05547	-0.866821
-4.36149	-5.82318	-4.04093	-4.93621	-4.80845	-3.97723
-3.33741	-3.5425	-4.13623	-4.89343	-4.30883	-3.94044
-4.02888	-5.43311	-3.75299	-4.47375	-1.42158	-2.10603
-5.50643	-5.92356	-3.03557	-2.43711	-3.01341	-1.56556
-4.49207	-5.56673	-3.57604	-4.98532	-3.17852	-2.71057
-4.76617	-5.62566	-5.04298	-6.45541	-2.85671	-3.5033
-4.43305	-4.88996	-5.12702	-6.13494	-2.34951	-1.76642
-1.37248	-4.18617	-6.11121	-5.18137	-4.06302	-3.52934
-4.52718	-5.23407	-6.81204	-5.8498	-4.47174	-4.54048
-5.25623	-5.28394	-4.77877	-4.5662	-2.90945	-3.91046
-2.97964	-5.01479	-4.68148	-6.12797	-3.26797	-2.84212
-4.70947	-5.41557	-6.08767	-6.30098	-4.47673	-4.64669
-3.59204	-3.42983	-3.80703	-4.92415	-2.62073	-3.13277
-4.61813	-5.54239	-2.25376	-3.7342	0.313877	-0.810919
-4.15658	-5.80021	-5.18333	-4.77547	-3.59198	-3.72047
-5.0007	-5.47444	-4.43254	-4.98305	-2.68673	-2.52747
-3.44885	-3.89197	-3.48268	-5.20128	-3.79013	-4.14411
-4.56553	-4.99447	-4.56612	-4.6823	-3.31002	-2.93857
-1.97395	-4.55521	-3.83155	-4.92846	-2.87557	-3.43965
-4.7374	-5.76696	-1.97961	-5.13102	-1.16108	-0.556756
-4.43734	-4.04842	-5.80942	-6.73693	-3.35283	-4.45871
-5.1354	-4.90157	-4.21031	-3.1557	-2.83267	-2.76325
-0.587063	-4.50491	-4.92169	-6.30123	-4.16116	-3.6067
-5.60211	-5.63712	-2.93695	-2.89266	-4.24407	-3.96546
-5.22864	-4.01747	-2.56557	-6.24387	-3.428	-3.05387
-4.25013	-4.07919	-3.36893	-6.06334	-3.14954	-3.88858
-4.34424	-4.44668	-5.09931	-5.86983	-4.04091	-3.90964
-4.53756	-5.70216	-4.3241	-5.85671	-2.40109	0.00111677
-4.37441	-5.59053	-4.65832	-5.91546	-4.10263	-3.38059
-6.30726	-5.62902	-1.37228	-1.95646	-3.89153	-2.8259
-4.79046	-3.18604	-3.23237	-5.15452	-3.66829	-4.16155
-5.40275	-3.3908	-4.63301	-6.57751	-4.55671	-4.21955
-6.43958	-5.62019	-2.29942	-3.38101	-2.9813	-3.40883
-5.70625	-5.4326	-1.75118	-3.74659	-3.44262	-2.96208
-4.9932	-4.55491	-4.58078	-4.61885	-3.12676	-3.52962
-4.60289	-3.51715	-4.85771	-5.26907	-4.64809	-4.04058
-3.29942	-3.05202	-2.74043	-5.07576	-3.08822	-3.85449
-2.07835	-2.56803	-3.67414	-5.02621	-4.13435	-4.34529
-4.27381	-4.55532	-3.92224	-4.84082	-1.27174	-1.66841
-2.48296	-0.791883	-5.18351	-6.83151	-3.51055	-3.00728
-4.29761	-5.58036	-4.30749	-4.40305	-3.68123	-4.24246
-3.88952	-3.71828	-5.39189	-5.57909	-3.79626	-4.41637
-2.94559	-1.98582	-5.58031	-4.85907	-3.21667	-3.53651
-0.332198	-4.4441	-3.61307	-5.88466	-3.18958	-3.8802
-4.82578	-4.50318	-3.04961	-3.50111	-3.03187	-0.121647
-4.91263	-5.07846	-2.78732	-2.14599	-4.23698	-4.57693
-5.27604	-4.04916	-2.81655	-4.44709	-1.78732	-1.70229
-4.90084	-5.2569	-5.19152	-6.53669	-3.39321	-3.33761
-4.50252	-5.59255	-5.11056	-5.84526	-3.22919	-2.7702
-4.6155	-4.63273	-2.75395	-3.88393	-2.49887	-3.09464
-4.76976	-4.39895	-4.89383	-6.40018	-3.69554	-3.78325
-4.31675	-5.49019	-4.3021	-6.43669	-1.77174	-2.3048
-6.20224	-5.55016	-5.47245	-4.71929	-2.67744	-3.67711
-3.91123	-3.63934	-3.495	-3.63413	-0.637413	-1.17376
-4.70054	-5.25295	-1.91358	-3.29605	0.766103	0.758453
-2.9192	-4.32147	-3.84883	-5.49921	-3.48792	-3.95815
-4.65377	-5.095	-5.29936	-4.66841	-4.37228	-1.68687
-4.56022	-5.07807	-7.65409	-6.21449	-3.97216	-3.3791
-3.61902	-3.21522	-6.67866	-6.07797	-4.35951	-4.22654
-7.25696	-5.21846	-4.79527	-5.49655	-3.38782	-4.22947
-4.38386	-5.35812	-4.18591	-5.30043	-3.38831	-3.8272
-3.80588	-4.95548	-5.63174	-4.35313	-4.52678	-3.9169
-3.62597	-5.24508	-2.58597	-3.15027	-2.73441	-3.77405
-5.29892	-5.21846	-4.17334	-3.84186	-4.35599	-3.86779
-2.46393	-2.79222	-3.28018	-4.23328	-1.75948	-2.56566
-2.77207	-2.94873	-4.55975	-5.89236	-2.26769	-2.02801
-5.2008	-4.73879	-2.43146	-4.94256	-0.134822	0.743873
-4.92697	-5.33665	-1.57586	0.0435358	-3.28809	-3.42832
-2.60675	-3.18838	-2.68434	-3.55981	-3.39592	-4.08825
-6.34723	-5.25724	-4.73283	-5.65922	-3.58337	-3.20003
-4.43416	-2.98307	-4.26126	-5.76911	-3.32215	-3.69435
-4.92245	-5.19385	-4.50747	-4.68894	-2.34045	-2.78886
-5.12256	-3.83928	-4.47757	-4.43395	-3.18395	-2.30592
-3.15673	-4.29736	-3.67277	-4.34844	-2.44469	-2.9274
-2.78058	-3.17661	-4.75022	-4.59156	-2.54468	-2.14904
-0.959441	-3.46627	-3.86717	-5.34019	-3.48818	-3.7166
-2.84792	-2.63266	-3.97104	-5.5803	-4.01501	-3.89753
-5.20765	-4.14218	-4.41525	-2.98668	-2.7793	-2.49666
-4.89291	-5.06531	-4.96431	-4.19326	-2.80544	-3.75922
-7.1035	-3.4455	-4.4007	-4.59036	-0.000470644	0.0190596
-4.98262	-5.31816	-4.40253	-5.80242	-2.41784	-2.28344
-4.68676	-5.39166	-3.88252	-4.23675	-1.19962	-1.05126
-4.43645	-4.8371	-4.67414	-3.57444	-3.58205	-2.98125
-4.95796	-5.20628	-5.40982	-5.25837	-1.78178	-1.40642
-4.34581	-3.84618	-4.75816	-4.76862	-2.83653	-2.95022
-4.24314	-2.36082	-2.95724	-3.3052	-3.58308	-3.09378
-6.01207	-5.30429	-4.15325	-4.30361	-2.96484	-3.72338
-1.30512	-1.97668	-3.44662	-3.68448	-5.10483	-3.91862
-5.80617	-4.81397	-2.95675	-3.95748	-3.85709	-3.82822
-5.08708	-4.05322	-5.172	-4.51264	-4.60934	-3.42573
-3.15049	-3.52899	-4.84431	-6.97074	-3.13877	-2.93349
-4.16798	-3.91872	-7.05393	-6.54391	-3.00785	-2.56662
-3.18444	-3.82369	-4.66125	-6.34535	-3.3726	-3.09512
-1.26762	-1.57037	-4.40891	-3.68135	-2.42904	-2.8264
-2.11941	-2.84323	-4.42088	-4.19711	-2.62187	-3.35322
-3.89212	-5.07463	-3.86345	-4.85091	-2.95997	-3.07818
-4.06207	-4.19229	-4.32072	-6.20151	-2.25138	-2.15295
-4.28914	-5.08065	-5.01438	-4.98663	-3.57201	-3.63291
-3.9983	-4.13815	-3.64128	-5.86003	-3.81937	-3.29267
-3.16101	-3.22297	-3.84293	-5.9785	-4.04625	-3.15
-2.91272	-3.55798	-6.01466	-5.34126	-3.39051	-3.64159
-4.55905	-5.1763	-5.5445	-5.68286	-4.26963	-3.72141
-3.90871	-4.84248	-3.47757	-3.14599	-2.98831	-3.12274
-1.16079	-2.76175	-2.72916	-5.0711	-3.41526	-3.53579
-3.19597	-3.03471	-3.36275	-5.64878	-2.10866	-2.86746
-4.98159	-5.1248	-2.69809	-2.43992	-3.62355	-3.6458
-3.01275	-3.29791	-2.1811	-3.82133	-3.34898	-3.26215
-4.46307	-4.92075	-5.68962	-6.15574	-4.16462	-4.15606
-4.00947	-3.17655	-3.22661	-4.97686	-3.9763	-3.75453
-4.60968	-5.10936	-5.10263	-5.15085	-5.16887	-1.79202
-3.65669	-4.53813	-4.34431	-5.32643	-5.0308	-4.87235
-4.4462	-2.8479	-2.92079	-5.88979	-2.61757	-3.54413
-4.9104	-4.93978	-3.01399	-4.0087	-3.1409	-3.53754
-4.04728	-5.14355	-3.63189	-2.21011	-3.52406	-2.6399
-4.34594	-5.25311	-5.43609	-4.82183	-0.385116	-1.61373
-4.00087	-5.18245	-4.13822	-4.12006	-2.75639	-3.30169
-3.19307	-2.7472	-3.85194	-4.88174	-3.45441	-2.79244
-1.32761	0.600364	-4.32761	-4.67642	-2.97179	-2.77296
-2.84808	-3.64929	-5.35017	-5.66521	-3.03224	-2.88438
-2.1081	-2.72156	-4.83171	-4.25912	-1.07844	-2.31743
-4.83057	-5.27133	-3.02061	-4.45007	-3.66026	-3.31919
-3.51325	-4.81329	-5.37123	-5.37255	-2.74056	-3.68915
-3.37882	-3.42657	-4.09956	-3.3052	-1.75893	-1.55578
-5.59886	-5.3198	-2.61667	-2.57626	-1.1528	-1.6788
-3.47188	-3.29469	-3.37097	-4.62889	-0.0339024	0.236048
-4.22075	-4.56865	-4.68967	-5.93358	-2.8468	-2.85838
-4.57632	-4.94689	-3.63992	-6.06073	-2.32762	-2.23005
-3.95795	-5.03141	-5.27604	-3.39827	-2.25614	-2.45057
-1.55808	-2.87157	-4.53587	-5.94665	-3.02079	-3.62861
-3.49094	-4.70703	-4.11187	-4.72597	-2.55235	-2.79076
-4.36162	-4.919	-2.34266	-4.00691	-1.99074	-1.96172
-5.47958	-4.54339	-4.83674	-5.78924	-3.37569	-3.04469
-3.86214	-4.56216	-5.77605	-4.65221	-2.40252	-2.77691
-4.52142	-5.02043	-3.82395	-3.78273	-3.50041	-3.04245
-1.92659	-4.30809	-3.83047	-5.92775	-2.62877	-3.02301
-4.59493	-4.89698	-4.2346	-5.07335	-3.12423	-3.29022
-4.91993	-4.93603	-5.21873	-5.42727	-2.44601	-2.77731
-4.57568	-4.93443	-2.29796	-3.95655	-2.18124	-3.25383
-5.9671	-4.64215	-3.54036	-5.05893	-2.93087	-2.77321
-4.40267	-4.69241	-3.7953	-4.07254	-2.33855	-2.05477
-3.6637	-4.03267	-3.17637	-4.15393	-4.33795	-3.30642
-2.90704	-4.29217	-4.38287	-4.47084	-2.83873	-2.36898
-2.23928	-2.98766	-2.71067	-5.3656	-3.41497	-3.74666
-4.81425	-4.25578	-4.03502	-5.23103	-3.33735	-2.76387
-4.16445	-4.72435	-5.72943	-6.58287	-4.34694	-3.18885
-1.74196	-2.01514	-5.91648	-4.39758	-3.06102	-3.18227
-3.66555	-3.68062	-5.72883	-3.98733	-0.718417	-0.303076
-3.75985	-5.01428	-5.24868	-6.3101	-3.35673	-3.48858
-4.90272	-4.20072	-6.87976	-5.98483	-1.00154	0.169531
0.424101	-1.83382	-4.80372	-4.66308	-2.47747	-1.97017
-3.27757	-2.78437	-4.28191	-4.49713	-2.95393	-3.40382
-4.14694	-3.98054	-4.47081	-3.72484	-2.17782	-2.24119
-4.8127	-4.52157	-3.90978	-5.24265	-4.17139	-3.39969
-3.97878	-3.73841	-3.24275	-5.3729	-1.81591	-0.927011
-4.70604	-4.39478	-3.8864	-4.00779	-3.48039	-3.14769
-1.74469	-1.76133	-5.42671	-4.06648	-0.749827	-1.67648
-5.09982	-2.71938	-2.32761	-2.31349	-2.71938	-0.948022
-3.62617	-4.74853	-4.0666	-5.38918	-0.881953	-0.479815
-3.43555	-4.70032	-4.46109	-5.13894	-2.27489	-2.5577
-4.04116	-4.63683	-5.68538	-4.37186	-2.9109	-3.17454
-3.39043	-4.27459	-2.74196	-4.87067	-3.06622	-3.00914
-0.671744	-3.97468	-7.88519	-6.75381	-1.68707	-2.4559
-4.31865	-4.13673	-4.6847	-3.78742	-1.31473	-1.70995
-3.78779	-4.66327	-3.47757	-4.62673	-3.11062	-3.32589
-5.45374	-4.16927	-4.80074	-6.1957	-3.04422	-2.71632
-1.68311	-1.67322	-2.6853	-3.91444	-3.04278	-3.26028
-4.86014	-4.79341	-1.62534	-4.1557	-2.53824	-1.98107
-3.78298	-3.81228	-3.21031	-2.48581	-2.43516	-2.54179
-3.80198	-4.54519	-4.53731	-3.15209	-1.93261	-1.99522
-3.59905	-4.52483	-4.48102	-5.06371	-2.97696	-2.76816
-4.60225	-4.48265	-5.27205	-6.05655	-3.08547	-3.02414
-4.34781	-4.5028	-3.94876	-3.91234	-3.28438	-2.88086
-3.52307	-4.6157	-5.47396	-4.55362	-3.5184	-3.34659
-4.82291	-4.50467	-6.46731	-5.26679	-1.58942	-3.26661
-4.98718	-4.69924	-4.02261	-5.51359	-3.66056	-2.83734
-4.09812	-4.99329	-2.32761	0.0435358	-2.42749	-2.24456
-5.07714	-4.29875	-3.65858	-4.20635	-3.38731	-3.16048
-3.69321	-4.72828	-4.73653	-3.67886	-2.20577	-3.12897
-3.05313	-4.17136	-3.7222	-4.88831	-1.42357	-1.09288
-4.96642	-4.14411	-3.87202	-4.81863	-2.85209	-2.26071
-3.44033	-3.82751	-4.83766	-4.99707	-2.09979	-2.54506
-3.52105	-2.96625	-6.536	-5.32157	-3.42701	-2.45784
-3.63601	-4.19702	-1.93109	-3.19777	-1.03422	-0.200811
-4.17916	-4.64631	-4.66757	-4.62991	-2.67739	-2.9027
-3.75067	-4.80575	-3.4774	-4.80825	-0.198166	-0.400686
-4.27846	-4.58107	-4.56762	-5.97313	-2.82361	-2.94417
-6.12232	-4.7446	-4.06904	-4.61679	-2.32062	-2.26324
-3.58838	-1.56408	-5.4076	-6.04893	-2.62643	-1.67262
-4.6946	-4.2989	-3.32115	-3.47805	-1.49541	-2.45659
-4.09376	-3.6192	-4.95094	-3.4386	-2.65335	-2.75166
-3.20769	-4.28973	-3.76614	-3.15085	-6.07467	-6.21175
-2.70552	-4.34041	-2.64938	-4.70601	-2.92981	-3.32199
-3.60499	-3.69307	-4.77572	-3.15271	-1.99933	-2.09859
-2.72192	-4.14465	-4.26166	-5.11381	-0.645291	-0.811829
-0.565737	-0.649252	-4.44634	-5.16641	-1.56668	-2.3095
-2.55063	-4.19703	-5.14533	-5.54089	-2.31458	-1.23718
-4.03946	-4.45419	-3.56174	-4.15637	-1.59184	-0.850342
-5.30255	-4.73263	-5.02956	-5.48871	-3.93235	-2.90701
-2.21926	-3.92912	-4.20811	-4.01122	-1.32892	-1.37552
-1.94999	-2.28236	-2.13624	-3.67642	-2.39355	-2.71259
-3.78668	-4.37829	-3.12238	-4.44389	-2.48973	-3.21862
-4.99234	-4.76971	-3.16786	-4.92367	-2.52843	-2.73803
-1.35323	-2.85496	-2.77454	-3.83047	-1.82514	-0.899103
-3.83154	-3.80664	-4.6153	-4.17241	-3.09899	-3.29942
-3.99836	-4.3155	-2.09062	-3.73796	-2.29257	-2.10706
-3.38765	-4.57034	-4.33387	-4.48967	-1.67492	-1.51207
-4.9225	-4.72682	-5.12227	-4.81339	-3.71236	-3.05038
-4.05067	-4.49515	-5.16448	-5.16842	-2.32937	-0.501582
-3.98586	-4.47582	-3.99595	-6.23926	-2.53886	-2.7126
-4.25406	-4.56734	-4.51269	-5.4419	-2.12206	-1.9344
-4.51393	-4.56788	-3.5195	-4.13059	-1.4047	-1.79554
-1.90137	-2.73553	-4.04992	-4.66023	-1.32708	-1.45367
-2.73395	-2.7147	-4.32413	-4.77019	-2.14325	-2.11941
-4.28095	-4.67665	-4.39411	-3.64986	-0.539155	-2.61525
-1.62006	-1.94536	-7.37471	-5.96512	-3.09621	-2.90018
-3.6572	-4.50013	-4.47967	-4.29227	-2.63894	-2.62766
-4.1482	-3.53972	-3.73136	-6.18943	-1.77982	-1.71735
-3.87885	-4.29441	-3.33086	-2.43594	-2.35838	-2.95036
-4.64999	-4.55451	-1.9701	-3.57444	-2.68985	-2.09739
-3.66271	-4.16541	-4.86431	-5.52105	-2.31567	-2.50835
-3.50541	-4.55969	-1.39564	-4.23217	-2.36364	-2.82488
-3.3923	-4.42864	-3.97504	-4.28025	-2.4723	-2.59547
-4.24008	-4.45443	-3.12587	-4.12466	-3.26675	-2.58626
-3.78193	-3.76045	-5.21665	-4.23137	-0.898349	-2.14974
-4.10016	-4.45618	-3.51627	-4.63786	-2.19413	-2.71485
-4.17044	-4.48235	-6.26286	-5.88919	0.0959733	-1.69006
-4.04188	-4.45522	-2.9109	-4.56895	-2.19867	-2.75212
-4.38715	-4.17647	-3.59958	-3.91355	-2.27876	-2.70199
-3.08929	-4.13428	-4.43475	-3.93493	-2.45956	-3.1281
-3.46697	-4.53261	-4.17273	-5.25708	-2.15827	-1.8658
-3.15334	-4.16107	-5.40902	-3.72795	-1.96306	-1.40363
-4.53024	-4.13186	-3.80354	-3.89489	-2.7449	-2.72865
-3.90382	-4.45235	-4.60407	-3.06867	-2.58864	-2.51608
-4.68699	-4.40599	-3.59312	-5.19694	-3.29297	-2.49055
-3.02929	-3.25342	-4.95929	-6.00409	-1.75529	-2.43141
-3.64033	-3.59452	-4.86825	-6.82543	-2.75994	-2.61286
-1.37525	-2.72124	-2.28061	-5.59544	-2.3435	-1.61066
-3.59676	-4.62815	-5.16949	-5.78059	-2.81952	-2.63558
-4.50776	-4.34002	-2.27607	-2.16001	-1.95107	-1.2523
-3.79871	-4.39051	-3.26873	-4.42928	-2.74303	-1.56986
-2.83073	-1.91103	-4.76864	-3.85708	-2.54586	-2.65875
-4.37891	-4.69269	-4.17676	-5.73123	-2.60355	-2.49566
-3.10276	-3.30653	-3.92004	-2.7873	-2.33799	-2.63114
-4.16985	-4.26481	-3.16097	-3.64295	-0.661844	-0.815787
-3.3856	-4.30663	-5.8938	-5.03711	-2.36037	-2.31064
-0.119715	-1.74124	-3.43609	-3.5671	-0.318086	0.479552
-4.1382	-4.13278	-4.92446	-4.11881	-1.2076	-0.772292
-1.39797	-3.90643	-3.04662	-4.37789	-2.29911	-2.64242
-3.68763	-3.66491	-3.55524	-2.48838	-2.56987	-2.00875
-1.72421	-2.06475	-4.32084	-4.30288	-0.954464	-1.39948
-4.76738	-4.46168	-5.94228	-6.08916	-2.47027	-2.62776
-4.61495	-4.35864	-3.05547	-5.33659	-2.25069	-2.0048
-5.50159	-4.19515	-5.06067	-5.76503	-2.29261	-2.42499
-3.94082	-4.01196	-4.2055	-3.45106	-2.31937	-2.29018
-4.042	-4.29572	-2.97223	-4.42174	-0.78648	-0.967871
-5.15317	-4.31368	-5.59289	-6.03862	-2.47254	-2.28795
-4.09343	-4.13477	-5.84353	-5.48269	-0.867244	-1.14868
-3.87034	-4.23517	-2.03557	-0.56531	-2.14141	-1.92863
-4.34483	-3.96906	-3.4536	-3.89008	-1.72872	-2.82269
-4.04459	-4.0089	-5.09255	-6.69004	-1.9418	-2.5625
-1.82309	-1.81536	-3.36596	-4.16972	-1.08938	-1.4359
-3.93956	-4.05675	-3.39306	-4.54839	-2.62913	-2.78591
-3.62504	-3.50219	-4.93617	-6.10145	-2.66061	-3.18707
-4.78323	-4.30281	-3.72582	-4.36351	-3.50359	-3.01031
-3.11631	-3.98064	-4.59922	-4.52829	-1.74505	-2.36783
-3.798	-4.39596	-3.72738	-4.3619	-2.50605	-2.12409
-4.13159	-4.12994	-5.64515	-4.26583	-2.55637	-2.38932
-4.21993	-3.89836	-3.22067	-4.91588	-2.29217	-2.76288
-4.69266	-4.24552	-4.09505	-5.07351	-0.892436	-1.20864
-3.97805	-3.53937	-2.06159	-2.85509	-2.32755	-2.51088
-3.93239	-4.12979	-4.9507	-5.41613	-3.02407	-2.38071
0.285234	-3.06772	-2.86655	-4.24784	-1.69222	-2.01497
-4.0808	-3.66226	-3.63152	-4.4435	-2.3508	-2.66302
-4.25193	-3.8596	-2.27806	-3.15758	-1.04332	-0.291381
-2.84673	-3.99029	-6.77333	-5.09128	-1.32723	-1.92745
-4.06494	-3.82752	-3.67651	-5.06532	-1.8911	-1.29496
-0.516742	-2.64641	-4.85684	-3.62889	-2.79708	-2.30873
-1.81096	-3.15599	-5.96066	-5.09459	-2.80941	-2.32043
-3.32244	-4.10114	-4.34723	-4.69062	-2.87892	-2.09957
-5.12945	-4.39842	-7.04359	-5.03142	-2.51909	-2.21982
-3.465	-3.88913	-3.98579	-3.59204	-2.40457	-2.38593
-0.738599	-2.44423	-1.5824	-3.6313	-1.94582	-2.44203
-4.1894	-3.74813	-5.31274	-5.68865	-1.17359	-1.7476
-4.95684	-3.84881	-5.54956	-5.50591	-0.791602	-0.830153
-5.04893	-3.79343	-4.92517	-6.38375	-2.27328	-3.02881
-4.075	-3.96018	-6.72497	-5.66611	-2.44567	-2.0713
-1.3472	-2.30583	-5.78129	-5.52055	-2.45686	-2.00817
-0.800676	-3.35785	-4.57821	-4.53804	-2.03594	-2.31313
-1.92198	-1.8742	-4.22143	-4.21011	-2.05019	-2.20094
-3.91125	-3.98284	-4.52333	-5.55215	-1.85438	-1.42627
0.536806	-1.9047	-4.31661	-4.73582	-2.67982	-2.66725
-4.16093	-3.82806	-2.18974	-2.73849	-2.30039	-2.08953
-3.3089	-3.63462	-4.48296	-3.14924	-1.94848	-2.14046
-3.77514	-3.9558	-3.16763	-2.63239	-2.30209	-2.19572
-3.80372	-2.14569	-4.11499	-4.43694	-2.31639	-1.6144
-3.56997	-4.09815	-4.95642	-4.72033	-2.11626	-2.10177
-3.0992	-2.44778	-0.746798	-0.97729	-2.43497	-2.33677
-3.49067	-3.74813	-4.45196	-3.41431	-2.08734	-2.52183
-3.53024	-3.60186	-5.67925	-5.05015	-1.97168	-2.31092
-3.601	-3.59384	-1.4899	-2.50948	-1.72804	-2.42097
-3.36886	-4.03356	-3.79269	-4.07254	-1.52509	-0.407564
-4.45324	-4.11102	-0.111103	-3.64986	-0.775789	-0.948471
-3.67732	-3.88772	-4.85083	-5.53414	-0.435826	-0.74885
-3.59474	-3.49069	-3.38597	-4.00347	-2.61047	-2.57549
-3.82071	-3.72795	-3.08781	-4.46987	-0.496303	-0.423644
-4.83415	-4.00579	-4.23333	-5.70189	-1.99032	-1.99774
-3.94304	-4.03371	-4.57124	-5.63376	-2.54677	-2.5142
0.523192	-0.798927	-4.36124	-4.34361	-1.61667	-0.463152
-5.11098	-5.71714	-6.08183	-4.62816	-1.72725	-2.33136
-3.07438	-3.30321	-3.55522	-4.00251	-2.02339	-1.26604
-3.2084	-2.8885	-3.47464	-4.12917	-1.77555	-1.7349
-3.5182	-3.51947	-4.07148	-4.02439	-1.1734	-1.56333
-4.27235	-3.90936	-2.4099	-3.46836	-1.84317	-1.87345
-3.73779	-4.06728	-2.70298	-2.896	-2.37749	-1.96667
-3.77187	-3.47098	-1.50695	-1.57683	-1.50244	-0.955317
-4.23624	-3.99053	-5.01508	-5.48678	-2.25987	-2.05438
-0.734133	-1.34751	-3.51789	-2.89017	-1.61357	-1.70948
-3.1817	-3.58885	-5.23945	-5.9893	-1.01736	-2.28877
-2.89867	-2.49628	-5.22782	-4.619	-2.60565	-2.14188
-1.41523	-2.50924	-4.37729	-3.85708	-1.59942	-2.03018
-4.14775	-3.78649	-3.56928	-5.09524	-2.02427	-1.80638
-3.08592	-3.63719	-4.86439	-5.05047	-2.21459	-2.0627
-2.72223	-3.73682	-4.12638	-5.40883	-1.30806	-1.83533
-4.5431	-3.71131	-6.11984	-5.95228	-1.97484	-2.31768
-3.24365	-3.92886	-2.98961	-3.98551	-2.01447	-2.13804
-3.51159	-3.96701	-5.48054	-5.84824	-1.55061	-2.29765
-2.00099	-3.02862	-3.20379	-3.50911	-2.03931	-2.22003
-1.6092	-3.24629	-4.33913	-5.55627	-1.97139	-2.16667
-4.42491	-3.68823	-3.31759	-3.7913	-1.6746	-2.14097
-3.7697	-3.37733	-5.13497	-3.75345	-1.66421	-2.03947
-3.08758	-3.77313	-4.80372	-4.41239	-1.89791	-2.01143
-3.90136	-3.53948	-2.83915	-3.56621	-0.600187	-0.113426
-3.34471	-3.73495	-4.86134	-5.65136	-1.69449	-1.9629
-2.99193	-3.60523	-4.05342	-5.38075	-1.37869	-1.76917
-3.35219	-2.99908	-6.59548	-4.56969	-1.77456	-1.91171
-3.57011	-3.89766	-3.69154	-3.68525	-1.82328	-2.2377
-1.67526	-0.6189	-3.68531	-4.77253	-1.5317	-2.08383
-3.27737	-3.6191	-5.80351	-5.75612	-1.9399	-2.02965
-3.60469	-3.55097	-4.45698	-3.38413	-1.4588	-1.9839
0.607252	-0.979237	-3.73697	-2.4451	-2.00167	-1.33069
-4.18544	-3.99593	-3.96833	-3.15371	-1.70149	-1.20222
-2.43775	-3.84172	-4.15202	-4.13682	-1.2817	-1.89145
-2.43958	-1.55213	-4.53535	-5.0715	-1.72509	-1.60085
-2.50698	-3.54919	-4.08306	-2.78898	-2.10342	-2.13935
-3.5677	-3.74647	-4.55669	-4.76403	-1.97474	-2.16129
-3.35974	-3.42509	-4.40973	-3.98971	-1.20469	-1.64169
-1.56961	-3.16278	-3.30079	-3.61668	-1.72125	-1.7194
0.122113	0.0072911	-5.36077	-5.5123	-0.526447	-0.223814
-3.50932	-3.74018	-3.01667	-3.31395	-1.58574	-1.92479
-2.84398	-3.70177	-5.30723	-5.92492	-1.70134	-2.21221
-3.7358	-3.48212	-7.63942	-5.55981	-1.19169	-1.77391
-2.96619	-3.42623	-2.82676	-3.30202	-1.81175	-2.12543
-2.34332	-3.6097	-4.10357	-5.56119	-0.994347	-0.815369
-2.84101	-3.41916	-5.12216	-4.03271	-0.825713	-0.649044
-2.60991	-3.513	-3.42285	-3.90911	-0.66478	-1.74516
-4.19932	-4.0033	-4.53813	-5.30622	-1.44315	-2.19637
-3.33653	-2.62161	-4.64515	-5.31759	-1.76295	-1.89084
-2.98369	-3.39508	-3.22686	-3.627	-1.88044	-1.90668
-2.20836	-1.63563	-3.52134	-3.64681	-2.43525	-0.763198
-1.40333	-2.83652	-4.77446	-3.94619	-2.09149	-1.86462
-2.65857	-3.10439	-4.02783	-4.32399	-0.897516	-1.6114
-3.5046	-3.42383	-6.25403	-5.25186	-1.17624	-1.16226
-3.61695	-3.36195	-2.4972	-2.68641	-1.82062	-1.44804
-5.06845	-3.51373	-4.80345	-3.73524	-2.25481	-1.21621
0.045036	-2.08044	-4.11566	-3.64132	-1.44418	-2.0774
-3.58863	-3.59107	-3.54086	-4.11944	-1.98706	-1.72971
-2.36585	-3.77707	-6.46153	-5.01376	-1.40273	-1.54787
-3.53379	-1.48585	-4.77276	-4.27138	-1.86679	-1.92137
-3.16652	-3.42072	-3.37063	-4.82816	-1.84119	-1.7166
-1.75389	-1.75867	-4.2479	-4.51407	-1.45614	-1.56411
-3.27694	-3.06973	-5.2347	-3.54691	-2.18944	-2.04367
-3.55961	-3.295	-3.63457	-4.75106	-1.51553	-1.45804
-3.22993	-3.56302	-1.54304	-2.64871	-1.71071	-1.55775
-3.36572	-3.00873	-1.66386	0.990638	-1.53719	-1.91628
-2.48634	-3.54805	-2.81111	-3.85402	-1.15805	-0.264898
-2.23488	-3.11188	-7.47365	-5.71266	-1.66876	-1.70483
-3.40221	-3.31855	-3.33962	-4.34821	-1.85864	-1.58665
-2.78272	-3.37307	-3.01796	-3.96788	-1.77936	-2.0371
-2.8514	-2.9534	-4.2055	-5.14843	-1.46837	-0.36732
-2.60195	-3.01112	-2.85384	-4.10342	-1.76369	-1.90222
-3.13591	-3.22867	-2.60376	-3.94761	-1.93998	-1.95164
-3.69708	-3.51758	-3.47919	-5.68889	-1.3579	-0.663495
-0.849279	-1.88998	-2.73767	-3.81391	0.568793	0.850624
-4.62946	-3.43727	-5.04171	-4.22984	-1.59766	-1.7883
-2.84962	-2.29876	-2.48296	-1.98095	-1.05115	-1.22314
-2.84234	-2.90473	-4.30854	-4.11984	-4.60197	-5.37095
-3.06327	-3.12807	-4.20811	-4.10176	-1.36503	-1.51004
-2.05506	-2.94158	-5.1437	-3.55398	-2.28761	-0.430758
-3.2586	-3.29073	-5.58859	-4.50919	-0.651823	-0.171292
-2.99894	-3.09153	-4.67883	-4.55085	-1.46067	-2.02768
-2.60978	-3.17925	-3.0448	-4.82545	-1.67745	-1.89013
-0.927044	-1.84917	-5.56388	-5.23817	-2.55662	-1.82622
-1.98038	-1.77475	-2.97645	-5.06629	-0.705294	-0.502113
-3.87872	-3.24552	-4.96219	-3.62419	0.95488	0.649049
-0.637736	-2.21891	-5.32435	-3.63588	-1.52686	-1.61864
-0.982385	-0.50964	-1.55686	-3.97577	-2.16635	-1.68242
-2.92775	-3.00237	-3.77674	-5.08671	-1.36965	-1.85528
-3.03118	-3.25497	-4.07157	-3.92503	-1.71669	-1.30472
-3.50039	-3.2645	-4.67196	-5.61197	-1.05274	-1.33062
-1.93998	-3.20293	-5.33515	-5.42825	-1.78867	-1.78576
-2.86941	-3.27438	-4.71201	-5.019	-1.50106	-0.5508
-3.19075	-3.13828	-6.70774	-5.28519	-1.0377	-0.508469
-0.500965	-1.76165	-4.57933	-3.75719	-1.13789	-1.29289
-3.6874	-3.38378	-3.38974	-5.44991	-1.6915	-2.01018
-3.21929	-3.03875	-2.17852	-2.8887	-1.72811	-1.53322
-3.03941	-2.83468	-1.69449	-3.43992	-1.67787	-1.64199
-2.6756	-2.78442	-4.82177	-3.93938	-1.49911	-1.70403
-1.75898	-2.95877	-6.47749	-4.61789	-1.77916	-1.14972
-3.59277	-3.32696	-4.15262	-5.07118	-1.04069	-1.18473
-3.19302	-3.29888	-6.91317	-5.46313	-1.48073	-1.30992
-2.98358	-3.29871	-6.05547	-3.97557	-0.837992	-1.21136
-3.16968	-3.52333	-2.40571	-2.64641	-1.39429	-1.30775
-2.71865	-2.81068	-2.45502	-2.82743	-1.7555	-1.2125
-2.3106	-3.05492	-4.34241	-4.52179	-1.36362	-1.87463
-2.15249	-3.41063	-5.79541	-4.32993	-1.3497	-1.41045
-3.16771	-2.99481	-4.35407	-6.51106	-1.33513	-0.760911
-1.47729	-1.93045	-3.80372	-1.72593	-1.31984	-1.39774
0.133072	-1.64641	-2.16083	-2.45304	-1.32148	-1.59062
-3.0733	-2.66413	-6.14473	-5.36777	-1.84452	-1.65812
-3.34875	-3.10651	-3.36541	-3.55325	-0.269651	-1.21666
-2.65826	-2.85182	-2.22555	-3.20699	-0.420828	-0.812568
-2.29548	-2.98489	-3.63983	-5.13374	-1.92277	-1.69202
-1.0854	-2.81036	-5.82148	-5.02695	-1.55996	-1.71507
-1.97302	-2.99401	-4.30954	-4.87561	-1.34899	-1.37262
-3.09149	-2.88723	-4.05264	-5.30873	-1.17284	-1.25821
-2.0908	-2.81646	-4.3084	-3.87414	-1.02675	-1.55176
-2.94549	-3.14479	-5.18058	-5.14028	-1.16642	-1.35249
-2.92647	-2.90167	-4.60655	-5.62585	-2.8989	-2.85585
-3.49329	-3.13954	-3.85409	-4.79592	-1.46382	-1.56784
-3.45322	-3.09417	-4.7875	-5.33638	-1.01727	-1.72188
-2.2049	-2.88653	-5.00578	-5.4249	-0.422043	0.0172139
-3.66513	-2.86002	-5.17957	-5.00875	-1.36282	-1.4735
-2.36468	-2.85548	-4.05788	-4.27583	-0.715437	-1.32343
-2.89883	-2.9378	-3.06221	-4.23903	-1.39525	-1.5468
-2.06112	-2.6388	-4.79084	-4.09523	-1.50735	-1.31654
1.09204	-2.19901	-3.98627	-5.03536	-0.85268	-1.07027
-2.7475	-2.97683	-3.33361	-3.01297	-0.884265	-1.04549
-2.9774	-2.90138	-5.10153	-5.38057	-1.45192	-1.71376
-2.62278	-3.05245	-4.77905	-4.12332	-0.474153	-0.883421
-2.73007	-2.72227	-2.15416	-3.5671	-1.4153	-1.32388
-2.61988	-3.03093	-4.06765	-2.90182	-1.36755	-1.30723
-1.57018	-2.99045	-5.55663	-4.09671	-1.49171	-1.63844
-2.53277	-2.53053	-3.60778	-4.26894	-1.32053	-0.983528
-2.24892	-3.87587	-4.66757	-4.77802	-0.620142	-0.933276
-2.72936	-3.0808	-3.68311	-4.62032	-1.30983	-1.45963
-2.77587	-2.76222	-5.07192	-5.48774	-1.03873	-1.14226
-2.88723	-2.72872	-1.57597	-2.88393	-0.955472	-1.37002
-2.43137	-2.7106	-3.8278	-4.56272	-5.27069	-5.38401
-2.67068	-2.59172	-3.60247	-3.62686	-1.53495	-1.41889
-2.95917	-2.65556	-5.45957	-5.29547	-1.18562	-1.6613
-2.35174	-2.63629	-3.49224	-3.3529	-0.934215	-1.01933
-3.80929	-2.75702	-2.50263	-3.85907	-1.0674	-1.14057
-2.06691	-3.39902	-5.92217	-5.63299	-1.04083	-1.43738
-1.99463	-1.16375	-4.64515	-3.14884	-0.772241	-0.619063
-2.802	-2.78451	-4.88884	-4.46003	-1.35964	-1.39523
-1.47334	-1.68107	-4.73653	-6.59455	-1.19817	-1.34155
-1.65972	-2.49567	-3.79093	-5.86571	-0.533506	-1.04789
-1.96425	-2.67258	-4.95545	-3.58845	-1.53366	-1.40353
-3.115	-2.67312	-4.82185	-5.41682	-1.17025	-1.23334
-2.27021	-2.69655	-4.02524	-5.3293	-0.74664	0.17577
-2.45452	-2.66134	-4.13497	-4.37394	-0.631547	-0.610515
-2.67867	-2.80344	-3.29987	-3.81369	0.316249	-0.371793
-2.19747	-2.17865	-2.95123	-2.64641	-1.17444	-1.20522
-2.38798	-2.06992	-5.97967	-5.2269	-0.795038	-0.621809
-1.95948	-2.46442	-4.44659	-5.96145	-1.39133	-1.29509
-2.24891	-2.72242	-4.55187	-4.85362	-1.43423	-1.17881
-2.38569	-2.19434	-4.55596	-5.16722	-1.15094	-1.42077
-0.00794614	-1.86546	-4.70515	-5.09316	-0.217309	-0.758736
-2.39766	-2.53638	-5.26615	-5.27958	-0.670742	-1.32374
-2.21351	-2.6562	-2.93305	-1.2964	-1.1693	-1.18709
-3.04959	-3.00233	-4.7855	-5.13822	-1.22048	-1.21686
-2.80999	-2.32994	-4.71851	-4.48126	-1.26872	-1.1692
-2.45324	-2.5208	-5.21134	-3.12492	-0.245858	-0.283604
-2.59919	-2.59	-5.48426	-4.8815	-1.00761	-1.14777
-2.18424	-2.74939	-2.21707	-2.53204	-0.452114	-0.921467
-2.17437	-2.18707	-2.45192	-3.4871	-1.21666	-1.21911
-1.5969	-2.26817	-1.82395	-3.57074	-0.864433	-1.24923
-1.92209	-2.37713	-2.18632	-2.44907	-0.904255	-1.2471
-1.5765	-2.52006	-4.15847	-4.73595	0.847242	1.65795
1.46709	-1.13419	-4.22319	-5.15591	-0.531292	-0.0994675
-2.46489	-2.71837	-2.27869	-1.57074	-1.10506	-0.928481
-2.24559	-2.36816	-5.56087	-5.52767	-1.26124	-1.31582
-2.95902	-2.17126	-3.96683	-4.1446	-1.03749	-1.22249
-2.41598	-2.52369	-5.41675	-5.57288	-1.34384	-1.30054
-1.91135	-2.6291	-4.02011	-3.54853	-1.07635	-0.962445
1.00837	-0.863732	-3.52297	-3.33688	0.0602235	0.246426
-1.70014	-3.52065	-4.85597	-4.30855	-1.42321	-0.978802
-2.04779	-1.97094	-4.5074	-5.14721	-0.814121	-1.25236
-2.11285	-2.04087	-4.08417	-5.05348	-0.936078	-1.25209
-2.71396	-2.41908	-3.93109	-3.61705	-1.30474	-1.0822
-2.99274	-2.49592	-3.54514	-4.36717	-1.45297	-1.21114
-0.1998	-1.73506	0.0864177	-1.9894	-0.150154	-1.11846
-1.01275	-1.97123	-1.85078	-3.44784	-1.15985	-1.02606
-2.43553	-2.44702	-6.27614	-3.73922	0.151356	-0.481176
-2.89805	-2.62286	-4.6218	-5.15817	-0.984947	-0.888931
-2.89075	-2.28356	-2.9326	-3.84025	0.619538	-0.223973
-1.91902	-2.44446	-3.87302	-4.60103	-0.741895	-1.30511
-2.61075	-2.0969	-4.41236	-5.25937	-1.23086	-0.898152
-2.23828	-2.08517	-3.64125	-5.05167	-0.156265	-0.637794
-2.419	-2.39443	-4.54706	-5.11423	-1.09947	-1.3647
-2.43746	-2.61039	-3.79007	-4.5693	-0.866907	-0.646378
-2.24931	-2.40391	-4.13481	-4.96398	-0.957293	-0.898681
-2.2736	-2.16382	-6.77462	-4.60641	-1.196	-0.90117
-1.01477	-1.7486	-2.89981	-3.58186	-0.793274	-1.20822
1.4568	0.514936	-4.49472	-4.84772	-0.325441	-0.39285
-3.18526	-2.29279	-4.59801	-4.21218	-0.320235	-0.809406
-1.67626	-1.963	-4.90232	-3.81213	-0.327322	-0.999044
-1.09935	-1.95287	-1.12571	-1.98307	-1.38481	-1.13396
-3.07191	-2.65972	-3.44978	-4.95865	-1.36225	-1.60972
-2.32954	-1.99412	-1.19226	-1.84466	-0.991519	-0.845833
-1.94662	-1.9495	-2.82249	-4.13866	-0.145502	-0.739065
-1.72525	-2.0289	-3.09768	-4.60104	-1.13394	-1.1218
-1.70461	-1.74411	-4.61583	-5.96615	-1.43545	-1.19351
-2.387	-2.46888	-1.22058	-2.29795	-0.330799	-0.927127
-2.04609	-2.48163	-3.7869	-2.86105	-0.649699	-0.975649
-2.01559	-1.94764	-2.73058	-3.47125	-0.715372	-0.636339
-0.626726	-1.54031	-5.17769	-5.19818	-0.565508	-0.564765
-0.872656	-1.81821	-3.94663	-4.01795	-1.36893	-1.08863
0.867499	-0.567407	-4.51723	-5.66516	-1.48979	-0.756663
-1.59455	-1.94029	-4.15238	-4.52423	-0.709989	-0.789866
-1.93972	-1.79547	-4.48557	-3.65879	-1.02283	-0.670159
-1.65658	-2.17518	-3.32304	-4.46396	-0.906189	-1.31022
-1.68572	-2.06834	-0.471989	-0.377598	-0.458443	-0.0662493
0.0580663	-0.758024	-2.49774	-2.78674	-1.15545	-1.27253
-1.82417	-1.93335	-5.91598	-3.39021	-0.901644	-0.6797
-1.55507	-1.83329	-3.81967	-3.10008	0.282242	0.738641
-1.42938	-1.94762	-3.81366	-3.95321	-0.828149	-0.821371
-1.62465	-2.13058	-4.35424	-4.58185	-0.745974	-0.824362
-1.64786	-2.01036	-5.19967	-5.45359	-1.20158	-0.783262
-1.83258	-0.941063	-3.00701	-3.57442	-0.722973	-1.06088
-1.9052	-2.17197	-3.9682	-4.54544	-0.961522	-0.907606
-2.20944	-1.77585	-4.44091	-3.30179	-0.449739	-0.945284
-2.01912	-1.90177	-4.22203	-5.38444	-0.393243	-0.132575
-1.87712	-2.04903	-4.81286	-3.60791	-1.00011	-0.575554
-1.63601	-1.36169	-4.31767	-5.82885	-0.186073	-0.97593
-0.771356	-1.82867	-6.37683	-4.34902	-0.221834	-0.899243
-0.857812	-0.424475	-3.88498	-4.48629	-0.646978	-0.496533
-0.141223	-1.74572	-4.7484	-4.627	-0.886584	-1.00726
-1.54169	-2.04077	-3.77437	-4.99108	-0.0422721	-0.934459
1.43254	-0.315693	-3.1354	-2.15027	-1.0067	-0.994299
-1.17799	-1.9444	-4.29213	-4.257	-0.61664	-1.10049
-1.21956	-1.5337	-2.6987	-3.05538	-0.898132	-0.502828
-1.5748	-2.00615	-3.84838	-5.21143	-0.547143	0.139386
-2.22521	-1.77303	-4.36101	-4.60085	-1.0664	-0.889855
-1.45612	-2.09175	-3.26398	-4.28727	-0.645132	-1.01851
0.610605	-0.964747	-3.89601	-5.17393	-0.454283	-0.663758
-1.31283	-1.40801	-4.64504	-3.40315	-0.616013	-0.753176
-2.11816	-2.0649	-3.44436	-3.44449	-0.647309	-0.47988
1.98767	-0.645453	-4.45364	-3.9448	-1.10436	-0.897709
-1.26806	-1.77161	-3.92391	-3.92398	-0.862272	-0.769996
-1.91987	-3.5257	-2.16083	-2.9785	-0.316007	-0.690238
-1.60719	-1.50646	-2.81994	-3.97577	-0.72773	-0.878849
-1.34837	-1.81524	-3.95966	-5.81331	-0.858566	-0.745704
0.889295	-0.984534	-6.50357	-4.60907	-0.456499	-0.703509
-1.42021	-1.4469	-3.17842	-3.89038	-0.450832	-0.811478
-1.60047	-1.51672	-2.09995	-3.83732	-1.19649	-0.680049
-0.772405	-1.58244	-5.80946	-4.95713	-0.959174	-0.694033
-1.57757	-1.41325	-5.87695	-5.39904	-0.337519	-0.501719
-1.28554	-1.42931	-2.80936	-3.15906	0.337299	0.888836
2.21872	-0.454021	-1.5344	-2.43711	-0.657303	-0.607906
-0.437208	-1.26471	-6.71557	-4.77832	-0.952623	-0.886528
-1.54081	-1.34063	-3.52612	-3.6145	-0.723798	-1.01513
-1.59319	-1.17761	-4.37514	-4.4834	-0.858388	-0.990783
-0.995026	-1.14086	-2.48215	-1.58713	-0.148731	-0.352031
-0.721287	-1.21417	-1.8	-2.3074	-0.75086	-0.515607
2.52082	0.971232	-2.2587	-2.6418	0.0929293	-0.413274
-2.08972	-1.43059	-5.10709	-5.12968	-0.426073	-0.414806
-1.50842	-2.98776	-4.39338	-5.78791	-0.704191	-0.572117
-1.45255	-2.07063	-2.91773	-3.46439	-0.502732	-0.755515
-1.07202	-2.83478	-3.68491	-2.48486	-0.456837	-0.591364
0.231379	-0.42113	-2.08261	-3.67389	-1.2087	-0.731246
0.303644	-1.11023	-2.81994	-3.77645	0.704796	0.70721
-0.862643	-0.942941	-4.55679	-5.11091	-0.698505	-0.933676
-0.693414	-0.962265	-5.0067	-4.93604	-0.342988	-0.408506
-1.20188	-1.31566	-4.66259	-5.09705	-0.161181	-0.47543
-0.809153	-1.04006	-2.71947	-4.31504	-0.648746	-0.588269
0.483478	0.635019	-1.91403	-1.48065	-0.274183	-0.731786
-1.34711	-2.9547	-5.9602	-5.39349	-0.502764	-0.544791
-0.511335	-0.291956	-3.81185	-4.87365	-0.187772	-0.628818
-0.634307	-0.827516	-4.32799	-4.97202	0.111589	-0.49424
-0.416704	-0.512327	-5.07307	-5.16926	-0.138104	-0.767488
-1.22389	-1.03285	-3.07167	-3.2727	-0.0897162	0.888757
-1.03882	-0.935494	-3.81891	-4.94571	-0.579553	-0.380742
-0.568322	-0.583375	-5.70269	-4.57171	-0.496541	-0.690477
-0.830848	-0.868821	-3.94123	-4.09797	-0.455313	-0.105253
-0.284183	-0.460984	-2.87274	-2.56103	-0.765285	-0.639533
-0.441916	-0.528166	-3.19441	-3.20777	-0.529593	-0.830375
-0.980097	-0.862913	-6.86359	-4.36822	-0.429558	-0.475355
-0.936953	-0.791896	-5.0787	-4.97279	-0.113409	0.252714
-0.396015	-0.330648	-2.08261	-1.2964	-0.429663	-0.523139
-2.8238	-2.89565	-1.89719	-2.58351	-0.137406	-0.126712
-0.361957	-0.718564	-3.09954	-4.635	-0.807506	-0.778326
-0.648657	-0.433695	-5.00737	-4.63934	-0.892774	-0.497088
0.456258	-0.137715	-2.52835	-3.07726	-0.247498	-0.425087
-0.514352	-0.669065	-3.26848	-2.94974	-0.703635	-0.708719
-0.27256	-0.196499	-4.32739	-5.13672	-0.600224	-0.525978
-0.356262	-0.338486	-3.43416	-3.78742	-0.472765	-0.28499
-0.588451	-0.558343	-5.2763	-2.98902	-0.36727	-0.218964
0.304313	-0.530185	-2.95949	-3.32259	-0.0221014	-0.752369
-0.358022	-0.51049	-3.8997	-4.88842	-0.490121	-0.56505
-1.09171	-2.36793	-3.61316	-4.50638	-0.488609	-0.67829
-0.346811	-0.228553	-5.32268	-4.99021	-0.476162	-0.558135
0.00550895	-0.348057	-3.60503	-3.73487	-0.33838	-0.578655
-3.00596	-1.20008	-5.35491	-4.83474	0.414587	0.319656
-0.531412	-0.530852	-4.84762	-3.68183	-0.675123	-0.370782
1.77572	1.01907	-4.05301	-5.39684	-0.0670683	-0.538371
-0.213196	-0.162442	-4.61775	-4.57429	-0.568725	-0.515558
0.96969	-0.483203	-5.49282	-3.70564	-0.319174	-0.264595
-0.350422	-0.0672471	-4.32472	-4.29614	-0.0850657	-0.349577
0.481635	0.573727	-4.15581	-4.93174	-0.609629	-0.669418
0.39137	-0.00198579	-3.84293	0.0288069	-0.350877	-0.526851
2.03687	2.26529	-4.1363	-4.68718	-0.38635	-0.380677
0.444845	0.316354	-2.45751	-3.03661	-0.299133	-0.520149
1.15549	0.527678	-7.00648	-4.33261	-0.268769	-0.293161
1.12851	1.23525	-5.03625	-5.58499	1.06734	1.37113
2.00683	1.98195	-3.33524	-2.69425	-0.0541816	-0.511846
1.45422	1.6624	-3.07016	-2.8126	-0.220698	-0.403491
1.26341	1.31969	-4.47508	-5.21687	-0.359017	-0.219693
2.02136	1.31147	-4.9055	-3.05725	-0.497665	-0.475172
1.07684	1.37788	-2.12675	-3.59766	-0.0756704	-0.391264
1.94829	1.70755	-8.10051	-5.57754	-0.496492	-0.450979
2.66552	2.03775	-4.74567	-5.84891	-0.377051	-0.280594
2.07286	1.84725	-4.14029	-4.75701	-0.709195	-0.353116
1.92933	2.15277	-3.43239	-4.54767	-0.375175	-0.10739
2.0627	2.46125	-3.21516	-3.73796	0.387882	-0.180835
3.10509	2.99791	-4.82163	-3.73372	-0.692937	-0.869325
3.43711	3.34223	-4.69876	-4.45009	-0.158421	-0.152333
3.85838	3.38854	-4.72519	-4.72432	-0.851883	-0.370057
3.97597	3.81231	-6.10117	-7.3626	0.093397	-0.0869166
4.61651	4.58522	-4.55379	-4.98582	-0.423603	-0.138907
4.42619	4.69203	-4.45745	-5.30644	-0.156617	-0.0420675
		-0.534401	-0.99855	-0.089094	0.317739
		-3.68046	-4.94416	1.2137	0.164157
		-3.88164	-4.22413	-0.234829	-0.0466143
		-4.90051	-5.10531	-0.38478	-0.243559
		-5.12138	-5.26609	-0.0575107	-0.0604639
		-5.29876	-4.3846	-0.10714	-0.210926
		-1.29966	-2.03249	0.00397424	-0.295452
		-3.34908	-2.14599	-0.419742	-0.620963
		-5.06487	-5.61288	-0.0460718	-0.324056
		-5.27604	-4.16331	-0.109695	-0.206696
		-3.95966	-2.80003	-0.616203	-0.154077
		-3.68538	-2.80435	-0.738767	-0.334496
		-4.64935	-5.15278	-0.591313	-0.302493
		-4.71331	-4.89251	-0.22283	0.0348217
		-3.1755	-4.12936	1.06054	0.0447491
		-6.01438	-4.63905	-0.323039	-0.212376
		0.40232	-1.98766	-0.476886	-0.133865
		-3.17142	-4.74183	-0.241861	-0.138757
		-6.33064	-5.58127	-0.212856	-0.0296923
		-4.74613	-1.83382	-0.0504192	-0.0335078
		-4.6818	-4.84395	0.751978	1.43217
		-4.38934	-4.2667	-0.0527945	0.0385664
		-5.70393	-4.32427	-0.152855	-0.148097
		-3.3575	-3.16243	-0.376089	-0.0991458
		-3.30373	-3.56346	-0.232069	-0.168985
		-2.75395	-4.22528	0.0725045	-0.0693855
		-2.0651	-4.55981	0.0554244	0.0153844
		-2.02754	-2.79711	-1.10774	-0.529353
		-3.44848	-4.51415	-0.0672793	-0.0114834
		-3.0922	-4.2838	-0.283613	0.0777044
		-4.767	-4.78959	-0.254469	-0.0364919
		-4.12819	-3.9698	-0.0285131	-0.353545
		-3.73697	-2.90182	0.461367	0.0571838
		-5.30085	-5.47142	-0.171842	0.00514705
		-2.33643	-5.14417	-0.00566861	-0.404236
		-3.73199	-3.65546	-0.00315006	-0.052939
		-5.39145	-5.75561	-0.102335	-0.323218
		-4.32717	-5.38234	0.193949	0.151061
		-4.67414	-4.39272	0.168116	0.350505
		-4.2443	-5.24986	-0.294016	0.0917899
		-4.43576	-4.42901	0.132796	-0.213317
		-3.9465	-3.74415	0.171166	0.295324
		-3.29564	-3.56772	-0.0908647	-0.386291
		-4.08422	-0.587125	-0.571532	-0.319581
		-6.12216	-4.84183	0.269349	-0.14094
		-4.64759	-3.2796	0.109834	0.0364745
		-3.62083	-4.19982	-0.231748	-0.0772523
		-4.4432	-4.67598	0.330124	0.110945
		-5.87887	-4.74613	0.437669	0.283693
		-2.88201	-0.987656	-0.164229	0.176095
		-3.68999	-2.52954	0.358622	0.129929
		-5.76821	-4.86005	-0.0667741	0.309638
		-4.3	-3.8657	-0.103159	0.24021
		-2.99521	-5.15533	-0.084772	0.170787
		-5.89779	-4.79091	0.309749	0.186258
		-3.867	-2.23445	-0.207995	-0.174206
		-2.41729	-2.65593	0.429485	0.448915
		-2.18658	-2.74491	-0.198409	-0.232815
		-4.2388	-5.20356	-0.348501	0.056685
		-3.43228	-3.75452	0.164967	0.38104
		-2.02782	-2.57797	0.512069	0.490172
		-4.25953	-3.05195	-0.0181166	0.372216
		-2.83604	-3.7063	-0.10427	0.336996
		-3.39057	-4.50679	0.168366	0.1533
		-3.46983	-4.2441	0.0640893	0.304659
		-4.19597	-4.00779	0.577283	0.0760913
		-3.90492	-4.80593	0.00113613	0.208557
		-3.46676	-3.51679	0.122416	0.127099
		-7.62588	-4.57669	0.0299412	0.572907
		-4.60638	-3.0653	0.0296802	0.429926
		-4.63298	-4.29609	-0.0489083	0.348217
		-4.44921	-3.40108	-0.0302039	0.175641
		-2.67709	-3.42167	0.0953101	0.181243
		-5.01778	-5.1095	0.528945	0.511805
		-4.64685	-4.88195	0.265565	0.213585
		-1.69492	-3.43196	0.0280001	0.450432
		-3.46109	-3.13607	0.0922579	0.189553
		-5.39752	-5.66022	0.104829	0.297916
		-5.14224	-4.89907	0.012251	0.362109
		-4.61998	-4.4626	0.44265	0.573913
		-5.00693	-5.50676	-0.0884347	0.0709098
		-1.11365	-2.79501	0.00481503	0.33023
		-3.56676	-3.68681	0.136665	0.131429
		-3.87023	-3.89213	0.0901749	0.0232226
		-4.79235	-2.84975	0.303413	0.208824
		-4.37729	-4.25754	0.419955	0.147984
		-3.14311	-3.49465	-0.39545	0.296212
		-4.66331	-4.7913	0.499092	0.68253
		-3.25547	-3.36685	0.48592	-0.0491262
		-4.95376	-4.81352	0.0224046	0.257193
		-4.46612	-5.22475	0.669383	0.48654
		-3.68154	-3.73408	0.0807175	0.374631
		-1.76763	-2.30719	0.236402	0.789756
		-5.35953	-4.92367	0.0558117	0.165687
		-5.36115	-4.07375	0.516289	0.356633
		-4.07838	-5.1814	-0.341314	-0.688963
		-3.64504	-3.44278	0.419177	0.116994
		-3.88588	-2.79121	0.0397668	0.516318
		-4.1155	-4.04818	0.993439	0.551298
		-5.98787	-4.27138	0.102927	0.643642
		-2.50475	-3.10679	0.205799	0.454326
		-1.63512	-1.79188	0.502397	0.576248
		-6.98941	-4.96834	1.10662	0.610784
		-5.92828	-5.24456	0.14233	0.422964
		-5.33843	-4.92714	0.455072	0.498155
		-4.74598	-4.49048	1.02359	0.396926
		-3.66593	-4.54269	0.160925	0.517598
		-0.851831	-1.86105	0.391211	0.547502
		-5.19076	-2.83258	0.777803	0.532745
		-2.82079	-3.03957	0.455049	0.381465
		-6.45239	-5.23884	0.119734	0.714631
		-2.77851	-2.36418	-0.176746	0.578014
		-6.06672	-4.27297	0.364819	0.366089
		-6.02659	-5.00687	0.0116252	0.303635
		-3.4007	-2.42605	0.108026	0.195605
		-4.70298	-3.78883	0.43762	0.252299
		-4.13657	-3.18895	0.778439	0.652985
		-4.22726	-5.26814	0.216868	0.47405
		-3.36829	-3.78234	0.133986	0.673973
		-5.05939	-5.56911	0.492854	0.441971
		-3.14708	-3.49544	0.0471413	0.506691
		-3.57589	-4.22173	0.372861	0.31511
		-3.53764	-2.56714	0.373047	0.56415
		-3.07267	-4.79916	0.331428	0.565412
		-3.48901	-4.01122	0.748555	0.710959
		-2.1354	-1.15542	0.358602	0.535991
		-3.76409	-4.76026	-0.268748	-0.237468
		-3.66885	-4.24518	0.598399	0.551407
		-4.09762	-2.67162	0.223655	0.748866
		-4.83395	-5.01879	0.418452	0.381956
		-1.52428	-0.550581	0.639461	0.294793
		-0.119452	-0.791883	0.485105	0.461422
		-4.53319	-4.91035	0.382942	0.720287
		-4.6165	-3.76324	1.087	0.410094
		-1.61424	-1.57027	0.685008	0.519864
		-3.05143	-2.75879	0.193009	0.362165
		-2.78182	-4.07077	0.567199	0.723214
		-5.89766	-5.29207	0.431664	0.650144
		-2.75273	-3.36601	0.389685	0.539829
		-4.87121	-5.22077	0.85293	0.63082
		-5.58716	-4.17211	0.556648	0.564542
		-3.68491	-3.19201	0.571197	0.614653
		-4.30475	-4.15533	0.2725	0.822642
		-4.15296	-4.13343	0.0379347	0.499106
		-2.813	-2.53204	0.959597	0.576635
		-1.1514	0.00603467	2.97452	1.97303
		-2.0613	-2.62437	0.955044	0.575415
		-5.6095	-3.54828	0.645603	0.885263
		-3.00085	-3.32427	0.616064	0.681688
		-3.76358	-3.62649	0.597974	0.85679
		-4.89623	-5.47873	0.39426	0.659695
		-5.16095	-3.4702	0.518483	0.546872
		-4.2512	-4.25485	0.571302	0.529121
		-2.94799	-2.09839	0.414396	0.679616
		-3.35923	-3.13609	0.83907	0.56473
		-4.98146	-5.42213	0.555329	0.798547
		-3.80845	-3.02151	0.501125	0.872852
		-5.16095	-3.84795	0.622042	1.16781
		-3.76805	-3.12774	1.0157	0.916288
		-1.9407	-2.14538	0.606939	0.836796
		-4.16853	-3.88241	0.628003	0.853772
		-5.09191	-2.72156	1.74551	2.1314
		-3.35012	-3.44907	0.574427	0.673559
		-2.9806	-2.46184	0.189818	0.747
		-3.34149	-5.48894	0.458718	0.604955
		-2.94672	-4.29774	0.351679	0.840649
		-3.96076	-4.61104	1.77275	2.65212
		-5.18279	-3.71163	0.455407	0.704456
		-4.55032	-5.00203	0.515194	0.764118
		-4.9303	-4.62144	0.827641	0.695692
		-3.10134	-2.82834	0.566943	0.903953
		-4.23659	-4.14198	0.677928	0.982587
		-4.00909	-4.49216	0.474085	0.687218
		-5.47731	-4.62962	0.836905	0.888172
		-2.50332	-2.06667	0.545166	0.862053
		-4.38503	-4.47565	0.89711	0.952617
		-3.17977	-2.08734	0.576672	0.810486
		-4.29089	-3.16001	2.80224	1.09547
		-3.94248	-3.15178	0.8086	0.762787
		-2.85633	-1.97302	0.547556	0.882235
		-3.00095	-3.30043	0.640618	0.840364
		-1.87811	-2.48323	0.662205	1.05137
		-6.2591	-3.8895	0.613536	1.12371
		-6.25867	-4.96968	0.822444	0.863136
		-4.04884	-3.30862	0.473287	0.571693
		-6.51764	-4.31972	0.73826	0.942867
		-3.91283	-3.11756	1.07394	0.595869
		-4.53669	-4.79004	1.23485	0.754646
		-4.81469	-2.19149	0.441333	1.06485
		-4.81205	-5.1225	0.716715	1.03986
		-5.01466	-5.13521	1.08953	1.18272
		-4.80141	-3.48471	-1.09583	-0.0469841
		-4.03539	-2.99819	1.01069	0.833626
		-5.07945	-4.63055	0.719941	1.291
		-4.35532	-4.54278	0.865782	0.847825
		-2.171	-3.9744	0.902685	0.99082
		-3.82871	-3.62437	0.84173	0.711841
		-3.77521	-4.57017	0.474919	1.6638
		-4.78075	-4.80448	0.426273	0.647239
		-0.693074	0.0227103	0.788213	1.22476
		-5.10083	-5.49563	1.031	1.10313
		-5.761	-3.27538	0.854313	1.1809
		-3.21249	-5.4742	0.769541	1.02562
		-2.19838	-0.903422	0.85805	0.919496
		-5.32397	-4.44527	1.22902	0.839547
		-4.37228	-2.63064	0.887736	0.797839
		-4.5815	-3.9963	0.938596	1.26184
		-2.69482	-2.81866	1.75435	1.25825
		-0.87274	-1.92794	0.9907	1.12269
		-2.06304	-2.87275	0.783849	1.20479
		-3.87984	-3.30798	0.936487	0.761021
		-4.61682	-4.72333	0.844113	1.10795
		-4.03557	-3.07311	1.49698	0.697931
		-4.33137	-4.8503	0.91318	1.22878
		-4.42785	-4.32633	1.24813	1.17334
		-4.19173	-2.91182	1.58654	1.56198
		-4.1239	-4.26493	1.34059	1.12457
		-1.71973	-1.6358	0.821755	1.09834
		-1.89901	-2.59564	1.15815	0.822967
		-5.73425	-4.98135	1.03538	1.3306
		-3.90232	-4.18219	0.701775	1.2717
		-6.01766	-5.25497	0.927261	1.25056
		-3.87886	-4.90297	1.19867	1.21051
		-3.772	-4.38385	1.24754	1.26037
		-7.37475	-5.08681	1.39303	1.43283
		-4.85985	-4.85773	1.47431	1.09394
		-3.2151	-4.30944	0.841457	1.27533
		-4.78079	-4.57057	1.27331	1.25767
		-3.94251	-2.78416	0.843488	1.35282
		-5.944	-5.01938	1.0607	1.03831
		-4.43874	-5.14971	0.823235	1.1374
		-2.79215	-1.7702	0.951759	1.06141
		-4.01335	-4.04044	1.32151	1.02782
		-5.6165	-4.42317	1.10718	1.38094
		-4.06021	-4.36337	0.977516	1.34179
		-3.8154	-2.8259	1.00387	1.20922
		-2.98379	-2.85555	0.903067	1.30902
		-4.45976	-3.86726	0.993808	1.3878
		-3.19478	-2.6325	1.19024	1.25839
		-3.89907	-4.19073	1.09451	1.38673
		-3.82292	-4.03392	1.55553	1.46214
		-1.38858	-0.351343	1.06718	1.34677
		-5.75116	-2.43984	1.02065	1.23622
		-2.04005	-2.36586	1.04438	1.24334
		0.351066	-2.31831	1.1725	1.31196
		-4.2084	-4.85707	1.59316	1.28511
		-4.92506	-2.36433	1.06424	1.32431
		-4.97159	-3.62976	1.56306	1.32763
		-3.65332	-4.0935	1.20164	1.43307
		0.326325	-1.32214	1.31728	1.57512
		-4.38157	-4.42335	1.08066	1.49893
		-3.72064	-4.01802	1.0248	1.39013
		-3.59377	-3.04393	1.59957	1.24095
		-3.48341	-4.65421	1.54663	1.63232
		-3.73863	-4.41525	1.17146	1.66757
		-2.64527	-2.30261	-3.74634	-3.47002
		-3.07579	-3.12962	1.39578	1.73637
		-3.53255	-3.86786	1.33139	1.50348
		-4.93051	-3.84855	2.11819	2.30433
		-5.59202	-4.22579	1.39392	1.61988
		-2.29117	-2.56968	1.10786	1.42729
		-4.09478	-4.30468	1.33511	1.58054
		-1.70688	-2.64076	1.41817	1.34182
		-3.90688	-4.55737	1.10971	1.60192
		-3.49491	-2.9233	1.36464	1.67746
		-3.55454	-3.53198	1.61642	1.49571
		-5.37716	-3.01747	1.51187	1.84151
		-2.76348	-2.72607	1.536	1.54287
		-3.66015	-2.84283	1.34707	1.40227
		-3.88116	-2.26143	1.17101	1.43436
		-6.02716	-5.1977	1.50549	1.79554
		-4.92238	-3.61381	1.77118	1.56717
		-3.56384	-3.98582	1.00393	1.45906
		-4.09718	-4.94072	1.38867	1.775
		-5.83836	-3.84855	1.6788	1.80987
		-2.81505	-3.56956	1.61243	2.18502
		-4.26251	-3.23558	1.54228	1.55388
		-4.47825	-3.70727	1.77806	1.73066
		-3.84032	-4.75912	1.47878	1.73677
		-1.44216	-2.09671	2.1461	2.27123
		-4.12279	-2.92721	1.97262	2.07922
		-4.9167	-5.09264	1.47692	1.67227
		-6.46184	-4.05501	1.48856	1.81201
		-4.64913	-4.51427	1.55473	1.84957
		-2.02924	-2.28117	1.61204	1.88413
		-4.09588	-3.72893	1.59616	1.65078
		-5.45423	-4.79883	1.53074	1.88003
		-3.71817	-3.37668	1.65394	2.13022
		-2.6551	-3.55377	1.76898	1.98844
		-3.16105	-3.64526	1.90353	1.79566
		-2.22964	-2.30337	1.57162	1.69946
		-3.17671	-3.77065	1.88113	1.76575
		-4.90155	-4.97057	2.36461	1.98705
		-4.04309	-4.60564	1.72304	1.661
		-5.44662	-4.56346	2.11001	1.94497
		-2.90611	-2.92205	1.68059	2.06938
		-4.66351	-3.37587	1.97688	2.00452
		-2.89626	-3.24043	1.88806	1.58868
		-2.26173	-1.97997	2.3854	2.42335
		-3.72668	-4.02358	1.71983	2.1463
		-5.19803	-4.44791	1.83878	2.313
		-2.7351	-2.63456	1.981	2.24993
		-4.09654	-5.2283	2.2399	1.99158
		-4.37652	-4.66389	2.06978	1.70084
		-3.52246	-3.48	1.73397	2.10175
		-3.60382	-4.49265	2.33763	2.50246
		-4.3494	-3.97675	2.23112	2.72184
		-4.46582	-4.82545	1.78154	2.15525
		-3.88475	-5.108	1.76911	2.3009
		-3.55377	-1.40815	1.69462	2.24066
		-4.60018	-5.33605	2.02618	2.18225
		-4.24559	-4.42144	1.98979	2.05562
		-5.6165	-4.80422	2.12932	2.05696
		-4.31792	-4.15844	2.1768	2.13457
		-7.48193	-6.67986	1.9646	2.20006
		-2.60399	-1.89163	1.94106	2.23789
		-4.17897	-4.64967	2.03234	2.11535
		-5.65202	-5.04831	2.19736	2.16073
		-7.69496	-4.27662	1.91243	2.23743
		-4.76516	-2.83829	1.99331	2.22479
		-5.30523	-4.05673	2.01354	2.45473
		-6.3055	-4.43334	1.95358	2.42245
		-3.63236	-4.04762	2.1019	2.10189
		-3.55712	-1.47748	2.12496	2.28057
		-2.42958	-3.09601	2.25321	2.58817
		-4.49553	-4.40554	2.10773	2.42096
		-1.88952	-1.71279	2.35101	2.08393
		-5.69421	-3.44565	2.48716	2.19795
		-3.5445	-3.31353	2.07888	2.39487
		-6.06231	-4.83107	2.51934	2.25097
		-4.63242	-4.83222	2.22355	2.4119
		-3.64797	-3.00888	2.22457	2.62137
		-4.03728	-4.01877	2.19878	2.24097
		-2.90971	-4.26829	2.19029	2.60643
		-2.88084	-3.52454	2.83892	2.23518
		-3.29925	-4.02789	2.87794	2.47057
		-4.14347	-4.338	2.86333	2.98692
		-2.36319	-3.27737	2.69392	3.08872
		-1.24882	-2.1369	2.40956	2.32645
		-2.39379	-2.30609	2.69131	2.95076
		-3.50535	-4.0923	2.12608	2.54637
		-0.990902	0.00145011	2.25566	2.45158
		-3.3575	-0.97668	2.8318	2.65427
		-3.0972	-3.50836	2.50106	2.91508
		-4.18349	-3.1311	2.44284	2.79554
		-5.53825	-4.67782	2.36542	2.67239
		-3.8299	-4.29298	2.88649	2.6221
		-3.34449	-4.46218	3.36675	2.82182
		-3.22008	0.00813021	2.35709	2.84188
		-4.70803	-4.84403	2.7208	2.64713
		-2.17022	-3.33014	2.79688	2.94871
		-4.93219	-4.33972	2.85518	3.23965
		-4.70354	-3.68538	2.41936	2.84936
		-3.55489	-1.64485	4.83949	2.98756
		-3.30373	-2.56932	2.67327	2.68366
		-4.14563	-4.65715	2.58357	2.94375
		-1.18054	-2.3969	2.76747	2.98436
		-4.91662	-4.76389	2.43693	2.93927
		-2.46781	-1.74453	2.45427	2.91532
		-5.86322	-4.48323	2.69311	3.09859
		-2.39379	-2.18086	3.10047	2.82135
		-3.9378	-4.69886	3.1758	3.5218
		-2.37347	-2.06233	2.91372	2.74733
		-2.82802	-3.27849	2.53403	3.08289
		-3.33701	-4.42869	2.93931	2.76809
		-4.08877	-4.8871	2.9979	2.95596
		-3.75238	-4.21734	3.00598	3.0815
		-4.10697	-3.75893	3.18067	2.90112
		-3.65636	-4.22804	3.57721	3.09103
		-5.29709	-2.5723	2.78579	2.89061
		-3.79444	-4.071	3.38967	3.0648
		-1.37175	-1.71805	3.14419	3.03485
		-4.29633	-3.5447	2.55536	2.99685
		-3.88304	-2.31395	2.83298	3.21367
		-5.28534	-5.19592	2.67642	3.00199
		-3.51885	-4.14589	3.12655	3.05731
		-3.9819	-4.00669	2.81155	3.2794
		-4.71001	-5.12944	2.98448	3.06321
		-4.93429	-3.80909	3.1207	3.15299
		-5.56233	-5.65136	3.1143	3.36288
		-2.7092	-3.12099	3.01121	3.08778
		-5.56918	-3.47553	2.81883	3.21788
		-2.37363	-2.46183	3.2989	3.3116
		-4.06073	-4.16961	2.98058	3.37674
		-2.74971	-1.66526	3.06914	3.5245
		-2.28256	-3.03477	3.22457	3.22259
		-4.13132	-4.57378	3.17269	3.27087
		-4.45624	-4.58807	3.08576	3.34474
		-2.07441	-2.78055	2.9655	3.44108
		-5.86661	-3.9093	3.19364	3.25596
		-5.12622	-4.24387	3.31259	3.17718
		-4.73653	-2.79438	3.12022	3.18854
		-2.73264	-3.21386	3.13339	3.26731
		-4.0543	-4.39049	3.24816	3.28112
		-3.42354	-3.7114	3.26189	3.28639
		-4.57976	-4.30674	3.52101	3.2784
		-5.41917	-4.82066	3.19224	3.17925
		-3.81021	-3.6762	3.39057	3.37894
		-3.1354	-3.95283	3.40075	3.72798
		-4.08072	-4.67393	3.44833	3.47126
		-2.01014	-2.37362	3.51147	3.66119
		-0.910001	-2.10531	3.1973	3.56908
		-3.20414	-3.89677	3.53574	3.43615
		-3.28738	-2.30747	3.39949	3.73666
		-1.55307	-1.94611	3.44967	3.48802
		-1.48789	-2.88305	3.36243	3.6119
		-2.55244	-3.67939	3.09068	3.55896
		-1.03422	-0.671122	3.42558	3.62827
		-3.85321	-4.08936	3.43468	3.68141
		-4.96049	-5.05501	3.5375	3.52498
		-5.82306	-5.11913	3.65273	3.7301
		-4.70948	-4.69208	3.25036	3.58358
		-2.18429	-2.4958	3.51914	3.84435
		-4.22241	-4.61409	3.64845	3.6054
		-1.86182	-2.56666	3.69295	3.76917
		-2.09858	-2.27632	3.45749	3.68403
		-2.03907	-4.44603	3.93048	3.67957
		-4.7045	-4.9943	3.46825	3.57708
		-3.2583	-3.73258	3.59779	3.6418
		-4.85131	-3.80125	3.47542	3.66238
		-4.06206	-4.1824	3.52937	3.60919
		-6.03693	-5.12258	3.86617	3.82747
		-4.09164	-4.58664	3.39471	3.6315
		-0.852797	-0.822845	3.80018	3.99685
		-1.74824	-2.77259	3.70027	3.97595
		-5.24895	-4.83252	3.76608	3.88357
		-2.74766	-2.02472	3.6636	3.90035
		-5.84632	-4.63792	3.68499	3.89911
		-3.31401	-3.94315	3.9643	4.09747
		-5.03878	-4.1762	3.67715	3.9261
		-5.07929	-4.42911	3.85966	4.05269
		-4.46731	-3.44111	3.76493	4.08409
		-4.24245	-4.41511	3.67137	4.21883
		-5.23572	-4.61002	4.1847	3.99339
		-3.79081	-3.21249	3.87652	4.12538
		-1.23979	-2.05689	3.89885	4.04787
		-4.03372	-4.55897	3.80628	4.15034
		-3.94015	-4.64278	3.83846	4.10673
		-4.4962	-3.17363	3.89945	3.95954
		-4.8813	-3.55429	4.2048	4.20586
		-5.56968	-4.87491	3.99927	4.01871
		-6.10125	-4.47801	4.12159	4.196
		-3.4616	-3.52581	4.21027	4.18608
		-4.47708	-4.81288	4.02372	4.02713
		-2.02021	-0.977897	4.05996	4.12126
		-4.94242	-4.35182	3.91091	4.3068
		-3.59596	-4.33571	4.27646	4.14601
		-5.04516	-4.81316	3.95277	4.28633
		-6.96701	-4.9819	4.14804	4.27016
		-3.6577	-4.01895	4.04418	4.29273
		-3.85131	-2.56225	4.0921	4.40497
		-4.02622	-3.37152	4.05059	4.31544
		-1.46617	-1.86726	4.17419	4.32999
		-6.08348	-4.58525	4.56542	4.4944
		-3.10368	-2.32211	4.51085	4.62315
		-2.79827	-3.68629	4.06543	4.32742
		-3.23446	-3.97352	4.28197	4.38787
		-5.62763	-4.03915	4.34428	4.49103
		-3.71064	-4.4998	4.3196	4.41742
		-4.48841	-3.81031	4.28724	4.3486
		1.05303	-1.71109	4.16948	4.43482
		-3.21611	-4.01564	4.3677	4.83858
		-1.75117	-2.30034	4.40339	4.70117
		-3.79714	-3.35736	4.42067	4.69808
		-3.82848	-4.33877	5.10536	4.78771
		-3.26361	-3.90129	4.60007	4.63119
		-4.54568	-3.38376	5.55327	5.12137
		-4.46731	-4.11339	4.89196	4.71089
		-5.37705	-3.34116	4.68154	4.81232
		-4.28417	-4.3949	5.01612	4.89157
		-2.82138	-3.39648	4.74654	4.98763
		-3.90839	-3.15839	4.31795	4.37639
		-3.58611	-2.15245	4.9104	5.09474
		-3.61325	-3.06743	5.03218	5.08958
		-3.52142	-3.95688	5.18133	5.0802
		-4.27878	-4.55147	4.99835	5.2072
		-5.80845	-4.19543	5.22553	5.07792
		-4.29374	-4.31809	5.0033	5.10833
		-5.57605	-4.36769	5.10304	5.26245
		-3.54085	-3.35869	5.25221	5.36297
		-2.79293	-3.15586	5.09011	5.31105
		-4.20454	-3.8262	4.90586	5.41579
		-4.74242	-5.21734	5.06302	5.41941
		-4.50842	-4.36676	4.85115	5.2555
		-3.80248	-4.53932	4.9675	5.33564
		-4.06256	-4.40176	5.07101	5.40816
		-2.88365	-3.26731	5.01212	5.44597
		-4.06778	-4.1434	5.01571	5.24695
		-3.63517	-2.85738	5.35922	5.56447
		-1.89696	-2.01211	5.08095	5.5516
		-2.95295	-2.73438	5.88919	6.02954
		-3.70739	-2.65229	5.89572	6.45905
		-4.11756	-4.80934
		-3.45797	-2.61513
		-5.97003	-3.63331
		-1.08599	-0.708382
		-2.16541	-3.64411
		-5.71396	-4.58868
		-1.33491	-3.0205
		-3.40571	-3.0742
		-4.86634	-4.9013
		-5.40603	-4.42268
		-2.42426	-3.45267
		-2.80666	-3.03383
		-3.8302	-4.14722
		-4.04833	-4.15247
		-1.78622	-2.97897
		-3.65597	-4.033
		-7.54906	-4.1189
		-3.52367	-3.50064
		-5.07831	-4.09936
		-3.34911	-3.36196
		-2.24408	-3.84899
		-4.47866	-3.87816
		-4.72726	-4.22478
		-2.08677	-2.22272
		-4.89784	-3.02644
		-2.00194	-2.38219
		-4.52203	-2.86912
		-5.05227	-4.44642
		-2.59989	-3.04611
		-1.77637	-2.56378
		-4.04213	-4.21371
		-3.8919	-3.86555
		-2.63231	-3.9578
		-3.23048	-2.55305
		-3.93024	-2.8332
		-4.03437	-3.83256
		-2.78637	-2.68062
		-1.90611	-4.01825
		-2.13623	-2.39851
		-1.96332	-2.33919
		-4.50481	-4.3763
		-4.12266	-4.49222
		-4.97204	-4.27225
		-4.29017	-3.46866
		-3.96124	-2.8187
		-2.50475	-2.38101
		-2.70298	-2.47186
		-3.19437	-3.11764
		-3.76937	-2.95792
		-4.88084	-3.92205
		-4.46612	-4.31042
		-3.83037	-2.74447
		-4.47448	-2.89017
		-1.96045	-2.51786
		-2.55799	-3.54728
		-4.34044	-3.97334
		-4.1667	-3.96557
		-4.0453	-4.82875
		-3.68176	-4.44429
		-4.25206	-3.81558
		-3.66587	-4.45333
		-4.80845	-4.69634
		-5.08814	-4.10186
		-4.50845	-4.64863
		-4.83598	-4.25461
		-3.12879	-3.60576
		-3.38621	-2.91366
		-5.02485	-3.99616
		-3.60959	-4.43408
		-2.69316	-2.80343
		-4.28017	-4.5324
		-2.5512	-2.66343
		-3.73698	-3.0464
		-4.15404	-4.08335
		-2.67526	-2.68398
		-2.66693	-3.72771
		-3.87513	-4.03605
		-1.36302	-0.576832
		-1.57615	-1.21219
		-4.75977	-4.55106
		2.63286	0.762118
		-3.55338	-2.83382
		-1.42354	-0.155425
		-1.31972	0.999793
		-4.47356	-4.34745
		-0.759231	-1.26413
		-4.39012	-4.04735
		-4.36421	-4.65507
		-4.72033	-3.99221
		-1.91707	-1.30958
		-2.83099	-3.02795
		-4.5266	-4.42988
		-3.72836	-4.09139
		-1.57587	-1.98156
		-3.17493	-2.69171
		-0.874582	-1.52679
		-3.50695	-2.68304
		-4.05575	-3.79259
		-4.03525	-3.56932
		-1.71643	-2.37706
		-4.38707	-3.56347
		-2.89784	-2.4131
		-2.09623	-1.72863
		-6.02472	-4.62369
		-2.5085	-4.26403
		-1.89296	-2.75776
		-4.78853	-5.642
		-4.00351	-4.20768
		-4.61878	-4.40043
		-3.11967	-3.50015
		-2.97989	-3.00367
		-1.81026	-1.92721
		-4.04465	-4.16324
		-2.48041	-0.396584
		-2.53375	-3.47837
		-4.21267	-3.98106
		-3.63133	-4.02462
		-2.9818	-3.01445
		-3.13239	-3.21622
		-3.81827	-3.53363
		-4.45145	-4.25301
		-2.33833	-2.63061
		-5.12786	-3.03559
		-2.66251	-3.86105
		-3.31409	-3.71623
		-4.74351	-4.63425
		-2.36995	-1.89433
		-4.71209	-3.60333
		-2.68523	-4.20777
		-3.16588	-3.36612
		0.967625	0.592522
		-2.81231	-3.01677
		-5.40722	-3.68748
		-5.11534	-3.29416
		-3.45026	-2.83828
		-4.70532	-3.26453
		-4.90776	-4.34983
		-5.39915	-2.90914
		-5.96204	-4.3374
		-4.00105	-4.65464
		-4.43036	-4.10431
		-1.84286	-1.63313
		-4.25101	-3.79213
		-3.10773	-3.84309
		-4.77014	-4.23573
		-2.02649	-2.57017
		-2.29545	-3.05509
		-3.8126	-3.9476
		-4.07596	-2.37017
		-3.92864	-4.1917
		-4.20613	-3.77279
		-4.80505	-3.39141
		-3.5569	-3.76483
		-1.54859	-1.56987
		-3.99539	-3.83748
		-4.02828	-1.7603
		-2.15555	-2.41329
		-1.33086	-0.77472
		-1.63026	-1.68641
		-3.7358	-4.14852
		-4.64092	-4.17525
		-4.68434	-3.26439
		0.499653	-3.65914
		-5.01914	-3.8735
		-2.59257	-2.88989
		-2.41236	-1.78883
		-2.8955	-3.37408
		-2.67664	-3.76757
		-5.78924	-3.76748
		-4.24131	-3.63531
		-4.14795	-4.26341
		-3.48573	-2.9674
		-4.66669	-3.84981
		-3.79833	-4.14875
		-5.11215	-3.91934
		-3.57138	-3.73661
		-4.86254	-4.422
		-3.94348	-4.04524
		-2.77077	-2.30494
		-4.957	-4.21853
		-2.37943	-2.12149
		-1.3407	-2.26138
		-2.80161	-2.73782
		-3.48787	-4.54654
		-4.48296	-2.50836
		-4.36289	-2.85575
		-0.620579	-0.720241
		-4.57861	-4.13166
		-3.68982	-3.58623
		-3.34869	-3.0978
		-2.74502	-1.91186
		-3.53467	-3.41061
		-4.5188	-2.68855
		-5.6453	-3.73101
		-3.13657	-3.67462
		-3.02813	-4.87659
		-4.59875	-3.15953
		-5.12058	-4.15978
		-3.46811	-3.64687
		-4.97183	-1.11432
		-2.09021	-3.35454
		-3.63008	-4.33335
		-2.44293	-2.44287
		-2.81682	-3.53286
		-2.17922	-3.65264
		-3.87171	-3.75221
		-4.18813	-2.48061
		-2.68093	-2.03261
		-4.03581	-4.27105
		-3.74221	-2.68381
		-3.58656	-4.18056
		-4.06819	-3.25535
		-3.71559	-4.33389
		-2.89777	-2.44747
		-4.4428	-4.19069
		-2.30114	-2.84849
		-3.84695	-3.76803
		-3.96432	-4.12574
		-6.34355	-4.38669
		-2.44678	-3.15209
		-5.89257	-4.40308
		-5.08257	-4.54402
		-2.14708	-1.57626
		-3.68878	-4.21287
		-4.37366	-4.40715
		-4.07595	-3.71677
		-2.98569	-2.6053
		-5.2821	-2.77161
		-4.5586	-4.41461
		-3.18133	-2.78638
		-3.67029	-3.01908
		-5.71688	-4.29101
		-3.61295	-4.2105
		-2.05536	-2.7466
		-2.93695	-2.07125
		-3.64069	-4.16421
		-3.79404	-3.81537
		-4.35858	-3.75922
		-3.91	-3.67736
		-5.85604	-4.8052
		-3.13612	-3.4813
		-3.71788	-3.36764
		-1.68796	-0.564077
		-5.64618	-4.6146
		-3.20772	-3.81258
		-2.81671	-2.27315
		-3.4723	-3.19648
		-4.34059	-3.96335
		-3.8086	-2.53906
		-4.16174	-3.81519
		-3.94716	-4.66029
		-4.6723	-4.20954
		-2.56751	-3.52568
		-3.43968	-3.52594
		-3.54721	-2.46008
		-3.99579	-3.92344
		-3.79066	-2.5181
		-2.8694	-4.21895
		-4.47718	-3.62641
		-2.91508	-4.06441
		-4.26367	-3.56358
		-1.90611	-1.79209
		-2.82724	-3.60856
		-3.44595	-3.40223
		-2.34931	-1.68855
		-6.84277	-3.86609
		-4.01012	-4.01941
		-4.85477	-4.38505
		-4.45918	-4.27157
		-4.3384	-2.95212
		-4.85411	-4.78357
		-3.84037	-3.15258
		-2.42449	-3.47953
		-3.4466	-3.30522
		-3.93546	-4.07659
		-3.67264	-2.44326
		-1.64151	-2.78586
		-2.52657	-4.35312
		-5.42911	-4.09806
		-3.21523	-1.26774
		-2.05248	-3.13119
		-1.46497	-1.97759
		-4.92378	-4.30618
		-3.30593	-3.6057
		-2.64539	-3.10764
		-4.88968	-3.4581
		-4.50005	-4.52773
		-5.10678	-3.58583
		-3.43867	-3.53339
		-4.01813	-3.59109
		-3.89369	-3.75377
		-4.0436	-4.02243
		-1.94872	-2.54506
		-3.06859	-3.0148
		-4.90008	-4.66753
		-2.90611	-2.51658
		-4.24941	-4.61541
		-4.13045	-3.67108
		-3.9165	-3.50012
		-4.83663	-4.05568
		-2.62899	-3.4887
		-4.81437	-3.91234
		-4.06053	-4.1086
		-2.25954	-2.14608
		-4.16083	-2.11966
		-3.43549	-3.44425
		-4.36188	-3.383
		-2.45748	-2.59416
		-2.31692	-2.90855
		-3.98429	-3.13773
		-4.68538	-1.45075
		-3.27607	0.600364
		-0.9663	-1.58607
		-4.92	-3.73539
		-4.6563	-4.22055
		-3.84672	-4.29372
		-0.0927963	-1.02059
		-3.50013	-4.03517
		-2.54422	-3.66784
		-3.98469	-3.95253
		-2.89937	-3.13183
		-3.67637	-3.46995
		-3.55719	-3.60676
		-5.10731	-3.78846
		-4.40891	-1.89662
		-2.89144	-1.98824
		-3.88861	-4.20862
		-3.6049	-2.53909
		-3.73383	-3.76546
		-3.32314	-3.37923
		-4.27329	-3.30507
		-3.26376	-3.35219
		0.102813	1.03438
		-5.12731	-4.26425
		-3.73601	-1.50971
		-4.67708	-4.3706
		-4.40917	-4.43823
		-3.17327	-4.30676
		-5.23205	-4.21019
		-4.25101	-4.26801
		-2.43752	-2.95784
		-2.65085	-3.58248
		-3.83401	-3.59068
		-6.71282	-4.58149
		-2.91144	-3.35536
		-3.23958	-2.66083
		-5.64095	-4.41444
		-5.07429	-4.66885
		-2.64172	-2.47061
		-4.90049	-4.38733
		-3.19837	-4.10885
		-2.56518	-2.20879
		-2.51017	-2.87884
		-2.75527	-3.273
		-3.88749	-2.02439
		-2.39449	-2.39057
		-1.35371	-2.65134
		-4.87497	-3.4841
		-3.85209	-3.81377
		-2.78585	-2.22523
		-4.19815	-2.26791
		-4.43172	-3.73388
		-4.43922	-4.05924
		-2.13108	-2.76334
		-3.72458	-1.85983
		-4.18365	-3.52365
		-4.29013	-4.20737
		-2.8676	-1.25772
		-2.97797	-1.94167
		-3.61325	-4.11817
		-3.46296	-3.92662
		-3.92224	-3.6009
		-3.95696	-4.45864
		-4.0211	-3.35256
		-4.9477	-3.80658
		-4.58511	-4.40498
		-4.45812	-4.39978
		-3.38426	-3.17126
		-2.1152	-2.82547
		-3.90987	-4.11948
		-2.424	-2.7514
		-3.58192	-4.14163
		-4.64142	-3.15245
		-4.30093	-3.56732
		-4.38316	-3.79366
		-3.96363	-4.10413
		-2.31833	-1.47913
		-4.20132	-4.24303
		-4.31588	-4.48376
		-3.39657	-3.2706
		-3.53523	-3.87873
		-5.62244	-3.75616
		-3.10741	-3.52919
		-3.51116	-4.10463
		-4.7882	-3.77823
		-1.85438	-2.92225
		-6.20157	-4.68576
		-3.41693	-3.69889
		-2.80076	-3.23673
		-4.38313	-4.43652
		-4.87619	-3.12168
		-4.22551	-4.1828
		-3.84069	-3.61488
		-4.05877	-3.97121
		-3.05539	-4.18617
		-3.77111	-4.10113
		-3.10989	-4.00783
		-0.591414	-2.56438
		-4.0569	-4.06912
		-3.32943	-2.32659
		-3.80625	-3.48493
		-4.77489	-3.64119
		-2.87892	-2.07065
		-3.18946	-3.43483
		-2.75954	-3.34296
		-3.51633	-4.12486
		-3.12663	-3.93161
		-1.29082	-2.98323
		-1.32761	0.43469
		-3.2479	-2.0068
		-3.10145	-3.98264
		-4.50886	-3.36464
		-3.81115	-2.7465
		-4.32983	-2.85907
		-3.62896	-2.51202
		-5.42606	-3.85608
		-2.73387	-2.58674
		-4.64378	-2.60593
		-2.97943	-2.43107
		-3.89517	-3.56027
		-3.17721	-2.20617
		-3.44184	-2.69989
		-3.97701	-2.87335
		-2.28528	-2.66133
		-3.89103	-2.94268
		-4.60487	-3.87694
		-5.70523	-2.45372
		-2.00939	-1.93809
		-4.29608	-3.98078
		-3.74834	-4.25451
		-2.61765	-2.42857
		-3.47678	-2.63833
		-2.39499	-3.85807
		-3.39855	-2.57908
		-2.90797	-3.07364
		-2.38774	-2.14835
		-3.72207	-4.31204
		-2.67914	-3.35696
		-4.03369	-3.21836
		-1.79868	-2.80647
		-5.14146	-4.16048
		-3.03596	-2.97062
		-3.99256	-4.10061
		-3.86442	-2.63151
		-3.79741	-4.03671
		-4.50305	-4.17671
		-5.929	-4.13974
		-5.75334	-3.66355
		-3.61827	-2.43644
		-3.84912	-4.09923
		-3.34717	-3.03297
		-0.617338	1.01693
		-2.75159	-2.11497
		-2.92198	-3.1905
		-2.22832	-3.04279
		-3.83059	-3.70779
		-3.73938	-3.18458
		-1.55462	-2.49352
		-3.6462	-3.59015
		-4.13283	-3.26255
		-4.31952	-3.873
		-3.36544	-3.06288
		-3.38855	-3.68762
		-3.79352	-3.54725
		-4.36392	-4.16412
		-2.12318	-2.47641
		-1.74402	-2.22654
		-3.56456	-3.20474
		-3.64135	-3.27217
		-3.599	-3.59435
		-3.62356	-3.99626
		-3.39768	-4.21665
		-6.17612	-2.17905
		-3.43374	-1.50048
		-3.9146	-3.84132
		-1.36983	-1.35237
		-2.28601	-2.58596
		-3.99712	-4.18103
		-3.239	-3.35574
		-4.00736	-3.61591
		-2.73335	-1.83879
		-2.50095	-2.19634
		-1.96436	-3.22329
		-1.75928	-2.37317
		-2.60119	-2.9143
		-3.31802	-3.74237
		-4.52645	-3.15533
		-4.85917	-2.62414
		-2.96349	-2.70831
		-2.98262	-2.06145
		-3.03668	-2.90475
		-2.51365	-2.10467
		-2.49787	-2.31089
		-3.54036	-3.61302
		-2.01199	-3.24692
		-4.12745	-3.24527
		-2.7046	-0.895689
		-3.77822	-4.40874
		-4.39472	-3.48501
		-1.70344	-1.97778
		-1.16075	-2.231
		-3.73918	-3.41834
		-3.51548	-2.48549
		-1.27384	-2.08705
		-2.37677	-1.73647
		-3.08369	-2.74362
		-2.72781	-3.37881
		-1.53768	-2.26122
		-2.70878	-3.30395
		-1.60605	-2.59764
		-2.95724	-2.42923
		-0.885254	-1.73944
		-1.10219	-2.2599
		-3.1171	-3.7667
		-2.29634	-1.69399
		-2.9252	-3.10529
		-3.75079	-3.52911
		-4.52107	-3.69716
		-3.82605	-3.92817
		-3.18325	-2.91939
		-4.1813	-3.77771
		-3.81614	-3.36835
		-4.68208	-3.9141
		-3.93209	-4.32246
		-3.32731	-4.06229
		-3.67869	-3.77662
		-4.01215	-2.93744
		-4.32328	-4.16285
		-4.90508	-3.65343
		-4.76614	-1.8441
		-4.53315	-3.40541
		-4.26456	-4.12271
		-2.61419	-2.68198
		-3.49446	-3.95375
		-2.23333	-2.14206
		-1.7159	-1.65749
		-3.37669	-3.43812
		-2.54071	-1.85082
		-1.46945	-1.79195
		-3.42369	-3.70429
		-4.36013	-3.12774
		-4.18813	-3.93444
		-3.45153	-3.50609
		-3.01187	-2.939
		-3.08715	-2.61165
		-0.0339024	-0.717183
		-4.24086	-3.95696
		-3.96398	-3.23541
		-5.38322	-2.05504
		-3.26164	-2.30595
		-2.84156	-3.96047
		-1.82096	-2.0728
		-3.63485	-3.15919
		-4.13134	-3.39109
		-2.82098	-2.75965
		-4.85524	-3.98473
		-3.19256	-3.88557
		-3.68817	-3.43041
		-5.3563	-3.80601
		-3.93121	-2.20595
		-4.14361	-4.08329
		-4.1726	-3.16373
		-4.37133	-3.84434
		-3.79638	-3.61298
		-3.05957	-3.07383
		-6.38019	-3.90863
		-2.45552	-2.50987
		-3.14101	-3.36151
		-3.33386	-3.26284
		-2.17048	-2.77224
		-2.12935	-2.94249
		-4.11089	-3.66611
		-3.5972	-3.58829
		-4.00967	-4.07623
		-4.13063	-3.69528
		-5.1563	-3.67966
		-4.85404	-4.50983
		-3.06381	-3.7601
		-2.84964	-2.40733
		-5.46792	-3.94176
		-2.85067	-4.1791
		-3.58931	-3.61624
		-3.99092	-3.15391
		-3.49405	-3.45255
		1.21651	-3.28425
		-4.41519	-3.91618
		-2.37084	-2.30787
		-3.65024	-2.84965
		-3.16093	-3.30708
		-2.58333	-2.64336
		-2.25419	-1.88017
		1.01734	-1.0515
		-3.9977	-3.04851
		-3.40312	-2.27294
		-3.19076	0.0154018
		-2.3526	-2.0512
		-1.42392	-0.768605
		-3.77856	-3.99319
		-3.30485	-2.88996
		-2.87739	-3.91994
		-4.50893	-3.24867
		-2.28706	-2.23214
		-4.30552	-4.16733
		-3.4872	-2.61486
		-3.3398	-2.2055
		-4.36986	-3.07122
		-3.51621	-3.06413
		-4.42058	-3.09547
		-1.94423	-1.39964
		-1.33353	-1.26681
		-4.21126	-3.34068
		-4.41022	-3.25971
		-1.7468	-0.309367
		-3.32119	-0.568034
		-3.3236	-3.14043
		-3.22423	-2.78428
		-3.74613	-1.44876
		-3.87637	-3.42524
		-3.64696	-3.45728
		-3.1324	-3.54952
		-3.33312	-3.20081
		-3.64274	-2.89626
		-2.55153	-2.75658
		-2.95913	-2.94282
		-3.43885	-3.67186
		-4.27627	-2.9231
		-3.64527	-3.12406
		-4.83887	-2.70893
		-6.82771	-3.84069
		-4.52747	-3.19307
		-3.90886	-3.84626
		-2.96079	-3.27016
		-3.92762	-2.80469
		-2.91638	-3.03128
		-2.53457	-2.35436
		-2.20011	-3.07585
		-2.76475	-2.54297
		-3.49637	-3.13348
		-3.83468	-4.18206
		-3.29637	-3.75038
		-3.55512	-2.34755
		-3.56066	-3.98238
		-3.4758	-3.84481
		-4.57637	-3.90177
		-3.88188	-3.82428
		-3.20028	-3.56659
		-3.26565	-3.57581
		-2.08451	-2.95892
		-2.24883	-2.58279
		-2.24405	-2.56895
		-1.21478	-1.42115
		-4.21145	-3.27588
		-3.50487	-3.63312
		-3.79836	-3.07553
		-2.82802	-2.39546
		-2.99067	-1.3628
		-1.50607	-2.36376
		-2.85431	-3.51912
		-3.02254	-3.57207
		-1.66577	-2.7175
		-2.56573	-2.32729
		-3.8955	-3.55384
		-3.07502	-2.79317
		-0.293293	-0.978248
		-3.58997	-2.3463
		-0.987039	-0.588183
		-2.43309	-2.26977
		-3.40469	-3.74863
		-3.81109	-3.86833
		-3.52535	-3.28887
		-3.27484	-2.59096
		-3.3346	-3.88402
		-2.8864	-2.91096
		-2.98302	-2.63529
		-4.04896	-3.63385
		-3.69507	-3.27458
		-4.15006	-3.53111
		-2.87632	-1.8364
		-3.83538	-3.79402
		-4.56531	-3.55706
		-3.23061	-3.21822
		-4.17961	-3.77312
		-3.21193	-2.78321
		-2.44531	-2.2524
		-1.07745	-0.0559201
		-2.92479	-3.22992
		-4.35493	-3.77081
		-5.0296	-3.65847
		-4.47791	-2.153
		-4.04224	-3.68297
		-4.68693	-3.56264
		-3.10219	-2.80229
		-3.79111	-3.3036
		-3.63403	-1.58741
		-3.7924	-3.89288
		-3.31853	-3.86099
		-3.03563	-3.03999
		-3.84701	-2.92738
		-0.355208	-0.626072
		-2.4394	-2.70538
		0.688829	0.643473
		-2.9444	-3.42169
		-2.88242	-2.61017
[truncated: 970 more rows]

## Sheet: Fig5C
ED_SL			EI_SL
WT	enok1	enok2	WT	enok1	enok2
-3.53431	-4.61791	-4.57673	-3.63273	-3.50985	-4.57385
-2.01609	-4.61791	-4.57673	-0.549288	-1.08054	-4.5666
-0.157904	-4.61791	-4.57673	-2.25104	-4.55752	-4.51634
-1.27377	-4.51274	-4.57673	-4.37348	-4.44329	-4.50728
-2.91824	-3.61791	-4.57673	-1.7292	-4.44178	-4.50577
-1.77002	-3.61791	-4.57673	-3.37045	-2.14099	-4.50425
-4.44293	-3.56437	-4.57673	-2.56162	-4.54391	-4.50273
-0.420191	-2.93022	-4.57673	-1.53594	-4.54239	-4.50121
-0.91998	-2.23347	-4.57673	-4.55777	-4.5363	-4.49512
-0.0918578	-2.55278	-4.56515	-2.17901	-1.48109	-4.47977
-4.61006	-3.01115	-4.55493	-4.48095	-3.40594	-4.4183
-4.38254	-4.45234	-4.51634	-3.37588	-2.40689	-4.4183
-4.53933	-4.41269	-4.47668	-3.36807	-4.34666	-4.40699
-0.6337	-3.4086	-4.46893	-4.46639	-2.34158	-4.40374
-1.79088	-3.37362	-4.38409	-3.32525	-4.30383	-4.36417
-1.11014	-1.77906	-4.1028	-4.3923	-4.27684	-4.33717
-1.74353	-4.61791	-3.95923	-4.3947	-2.71731	-4.33205
-0.57192	-3.51457	-3.95923	-4.38718	-1.5204	-4.33205
-0.205432	-2.54112	-3.95923	-4.18796	-4.25776	-4.32176
-2.50277	-3.52932	-3.92419	-3.248	-3.27807	-4.29043
0.567476	-2.51541	-3.90933	-4.34071	-3.2159	-4.27806
-3.57221	-3.50286	-3.89582	-4.2149	-3.09761	-4.15977
-2.51341	-4.44026	-3.88675	-3.98693	-3.1619	-4.12072
-0.157811	-2.43456	-3.85454	-4.16791	-4.15397	-4.11279
-2.81117	-3.40338	-3.84987	-4.13368	-4.01456	-4.07855
-0.226424	-4.30518	-3.75167	0.141275	-3.00617	-4.06833
-0.431534	-4.61791	-3.57673	-3.06858	-3.9457	-4.00969
-0.397369	-4.61791	-3.57673	-3.86947	-3.04445	-4.00327
-3.63562	-4.5164	-3.57673	-4.06592	-2.93928	-4.00327
-1.00153	-2.93144	-3.57673	-3.04864	-3.92566	-3.98599
-0.560314	-2.23347	-3.57673	-4.03458	-2.91729	-3.97946
-2.61276	-4.48801	-3.552	-4.44293	-4.51274	-3.95923
-0.637012	-4.57991	-3.53873	-3.53204	-1.39578	-3.95345
-0.597704	-4.5164	-3.51842	-2.42096	-3.99198	-3.9508
-0.785013	-2.99831	-3.51842	-3.98123	-1.96728	-3.9261
-0.398565	-2.93144	-3.51842	-4.60286	-4.47622	-3.92271
-3.13164	-4.1177	-3.45902	-2.14213	-4.46351	-3.90634
-1.453	-3.38351	-3.44384	-3.47241	-3.50436	-3.89733
-4.32107	-4.39088	-3.39656	-2.8503	-3.44663	-3.89129
-4.40492	-4.38345	-3.28396	-3.53798	-4.42252	-3.86535
-1.05316	-3.56627	-3.23519	-3.52871	-3.41142	-3.85609
-1.421	-3.56437	-3.23519	-2.15947	-2.75397	-3.81796
0.270781	-2.21199	-3.23519	-4.48306	-2.81444	-3.81043
-1.26727	-3.55714	-3.22796	-4.46964	-2.76047	-3.78949
-1.11265	-2.93579	-3.20899	-2.85102	-2.72804	-3.78837
-3.04701	-3.22198	-3.1808	-4.27157	-4.34503	-3.78786
-2.61414	-2.13445	-3.13044	-3.41635	-3.347	-3.73996
-3.85002	-1.9724	-2.98381	-3.4113	-4.3936	-3.73492
-0.662557	-4.61791	-2.95923	-2.67356	-1.70133	-3.71455
-0.917964	-2.93	-2.95119	-4.37344	-1.70482	-3.70081
-2.97774	-4.50696	-2.94685	-2.2173	-3.24411	-3.68694
-2.98349	-2.16931	-2.92836	-2.6373	-3.72091	-3.67973
-4.36132	-3.48276	-2.87102	-3.50506	-3.57486	-3.63886
-1.5116	-4.04081	-2.76327	-3.1174	-4.1872	-3.63369
-1.27231	-3.56437	-2.75534	-4.30659	-4.18361	-3.62644
-2.17614	-1.92714	-2.73647	-3.49117	-2.01273	-3.62497
-1.13885	-4.61791	-2.72206	-4.10468	-4.17449	-3.62098
0.469383	-3.56437	-2.72206	-3.66889	-2.6014	-3.61376
-1.94876	-4.48283	-2.72177	-4.63938	-4.5164	-3.57673
-2.63852	-2.58282	-2.60524	-2.58589	-2.96449	-3.57673
1.63707	-2.22264	-2.56515	-3.63562	-2.19081	-3.57673
0.337922	-2.929	-2.55226	-2.57394	-1.54256	-3.5666
-1.86885e-05	-4.5164	-2.54728	-3.61235	-3.5411	-3.55346
-0.263961	-2.19228	-2.54728	-2.22067	-3.15317	-3.54804
-2.52272	-3.55468	-2.50683	-4.20524	-2.53661	-3.53261
-2.95491	-3.07634	-2.50374	-3.58494	-3.46582	-3.52981
-0.679228	-1.1501	-2.45494	-4.57897	-4.46351	-3.52384
0.0547811	-0.487682	-2.41144	-3.53431	-4.61791	-3.51842
-1.46862	-4.61791	-2.39588	-3.53431	-3.56437	-3.51842
-1.51264	-3.51274	-2.37427	-4.63186	-2.96324	-3.51842
-4.3786	-4.25948	-2.299	-3.63128	-3.51024	-3.51409
-3.44811	-4.42654	-2.28367	-4.62488	-2.55082	-3.50392
-2.43549	-4.366	-2.21947	-4.60124	-4.58729	-3.4878
0.868575	-1.96389	-2.21378	-4.40641	-3.47622	-3.48189
-2.23421	-2.21347	-2.2119	-4.39899	-4.47246	-3.47448
-1.13885	-3.56627	-2.10835	-3.50904	-2.87045	-3.45015
-1.53606	-3.56627	-2.08701	-2.91967	-2.46116	-3.447
-0.999716	-2.59186	-2.06597	-2.4575	-1.88405	-3.43986
-3.53493	-1.99479	-2.06308	-3.30211	-1.58071	-3.43591
-2.60709	-4.20525	-2.05872	-4.35059	-3.47393	-3.42608
-1.19846	-2.24006	-2.05196	-3.43757	-3.31845	-3.38244
-1.13941	-2.23203	-1.99033	-4.30687	-4.37668	-3.38236
-1.21308	-2.25452	-1.97541	-3.47073	-4.34786	-3.35354
1.10014	-2.96324	-1.95263	-1.88541	-3.34807	-3.35192
-2.71715	-4.47709	-1.9498	-4.23704	-4.41202	-3.31252
-2.5505	-4.58434	-1.92236	-1.32054	-2.30092	-3.31139
-0.336353	-0.527725	-1.90866	-3.34203	-3.27454	-3.28691
-1.77643	-4.07839	-1.85636	-4.21017	-4.27997	-3.28565
0.103508	-1.11934	-1.85062	-4.37923	-4.25625	-3.25827
-1.81821	-2.28046	-1.82943	-0.842227	-0.963552	-3.23519
-1.93193	-2.81271	-1.81473	-4.14958	-4.21938	-3.22506
-1.64381	-4.33034	-1.76657	-3.51104	-2.90573	-3.21192
-2.01731	-1.72101	-1.7386	-2.8935	-3.54153	-3.21046
-0.717717	-1.5949	-1.70979	-2.87685	-3.85914	-3.20046
-2.14791	-2.47758	-1.64804	-2.1799	-1.87671	-3.1823
-1.15754	-1.56532	-1.63202	-3.27351	-4.15053	-3.15255
-1.71553	-2.51366	-1.61665	-4.53026	-2.11187	-3.1336
-0.357103	-0.675922	-1.60248	-4.50686	-2.83948	-3.11019
-1.22411	-1.0729	-1.55576	-3.2148	-3.09192	-3.0976
-0.390105	-2.13651	-1.43828	-4.45987	-4.33689	-3.05568
0.625974	-1.32285	-1.40264	-2.79582	-4.43021	-3.04749
-1.31444	-2.19301	-1.3806	-2.13619	-2.05002	-3.04602
2.8945	-2.23272	-1.35486	0.0783297	-0.900105	-2.9641
-0.610059	-1.0826	-1.28872	-3.35608	-2.28953	-2.95941
-2.12013	-2.49929	-1.28853	-4.42259	-2.9111	-2.93889
-1.37569	-1.97941	-1.22152	-3.50867	-4.48726	-2.92349
0.104915	-1.37786	-1.1481	-2.12612	-4.48065	-2.92054
-1.56165	-1.76563	-1.08882	-4.02802	-1.62963	-2.91458
0.354348	-0.0888088	-1.08774	-2.2291	-3.52043	-2.90869
-0.511796	-2.53926	-1.07825	-2.44657	-4.53018	-2.90404
1.94031	0.43996	-0.970076	-4.57597	-2.87433	-2.90334
0.0505906	0.408201	-0.934218	-2.12809	-3.40804	-2.88707
-2.02077	-2.8979	-0.920397	-2.4156	-2.85622	-2.87863
2.0641	0.377729	-0.848476	-4.55025	-4.43479	-2.87102
-0.859658	0.185067	-0.800774	-2.72982	-2.90479	-2.86361
-1.71553	-1.53926	-0.735769	-2.4	-2.05622	-2.85571
2.86625	-0.539256	-0.730306	-3.41752	-3.44597	-2.83234
-0.372531	-1.36244	-0.725971	-2.64263	-4.10346	-2.82592
1.29387	-0.211745	-0.571634	-2.87065	-2.75519	-2.81552
-2.6336	-0.508789	-0.546479	-1.77172	-4.19323	-2.81051
-0.59577	-3.12622	-0.495435	-4.20717	-4.08805	-2.81051
1.34885	-2.53926	-0.420008	-3.73454	-3.80801	-2.81002
-0.165875	-0.561747	-0.366734	-3.72745	-3.90243	-2.80293
0.517143	0.449519	-0.311084	-3.35806	-4.44166	-2.78298
0.389932	-0.293522	-0.260692	-3.45071	-2.43676	-2.77808
0.551716	0.654837	-0.243881	-1.62694	-1.53104	-2.74666
-0.798058	-0.954293	-0.184344	-2.06068	-4.40702	-2.74174
-0.482957	-0.463813	-0.0540826	-1.5122	-1.7409	-2.73061
-0.27141	-1.02761	-0.0430448	-2.94757	-1.50569	-2.72177
1.58253	-0.829983	-0.0301303	-4.63505	-2.95766	-2.71772
-0.117487	-0.234873	-0.0221584	-3.49482	-3.52678	-2.71586
-0.271943	-0.988512	0.018176	-2.9739	-3.55903	-2.71482
1.73432	-0.00805562	0.0351929	-4.1654	-2.26265	-2.71424
0.596668	-0.16564	0.135885	-3.62197	-2.57444	-2.70464
0.187461	-0.304455	0.162048	-4.59977	-2.48248	-2.68996
0.86296	0.849054	0.236194	-3.56162	-2.95895	-2.68134
-0.178513	-0.627913	0.241429	-4.39004	-3.45985	-2.66916
0.916131	0.185366	0.351217	-4.15134	-3.32632	-2.66764
-1.62181	-1.21182	0.578173	-4.37953	-4.5545	-2.65865
-0.45667	-1.98343	0.6601	-1.45632	-1.68294	-2.6379
0.099961	0.0886051	0.82709	0.315298	-2.61369	-2.63611
0.891157	0.0357609	1.0556	-3.11378	-3.18541	-2.62348
1.00621	0.813557	1.08874	-3.16285	-4.24645	-2.58118
4.14051	1.33911	1.09808	-2.5472	-1.17984	-2.57931
0.860865	0.849319	1.17199	-4.47825	-4.35914	-2.56845
2.56796	1.06473	1.21436	-4.47825	-3.36096	-2.56845
0.465245	-0.141641	1.29187	-3.63562	-3.56627	-2.55226
1.53778	1.26858	1.35133	-2.92053	-3.56437	-2.55226
0.875618	0.644793	1.3785	-4.6307	-4.60923	-2.54358
0.879789	0.656391	1.38163	-3.33856	-3.31349	-2.5228
2.68341	2.07883	1.6707	-2.71463	-4.41202	-2.51616
1.38055	0.992035	1.69087	-3.5887	-3.51745	-2.50534
1.19574	1.48029	1.88967	-2.2853	-2.48451	-2.48927
1.52332	1.6372	2.02653	-1.347	-1.14906	-2.47826
2.10106	0.769419	2.09577	-4.18968	-2.67696	-2.4688
1.97559	1.48682	2.27122	-4.13917	-4.1177	-2.45902
1.43156	1.53709	2.3602	-4.53158	-4.40494	-2.44446
3.48058	2.38698	2.54015	-3.4562	-2.45857	-2.43681
3.10979	2.38323	2.54949	-4.11015	-4.28512	-2.42255
2.87703	2.62998	2.59938	-1.89409	-2.58555	-2.3764
2.55289	2.51817	2.87299	-3.63562	-4.5164	-2.36987
3.04004	2.88624	3.06413	-2.38726	-3.41557	-2.36962
2.92479	2.83908	3.29368	-2.64618	-3.62476	-2.34355
3.18556	3.25152	3.35943	-2.26005	-4.56352	-2.34149
3.43289	3.78831	3.67056	-1.95747	-0.735766	-2.34057
3.89966	3.43167	4.01767	-2.07875	-3.71552	-2.33281
5.45819	3.89447	4.02675	-2.34682	-3.32174	-2.32742
4.22323	4.15309	4.26739	-1.94198	-2.18802	-2.32592
5.66175	4.28213	4.3092	-3.27933	-4.36294	-2.2923
4.30158	4.12233	4.38715	-2.83204	-3.53171	-2.28367
4.374	4.20452	4.61102	-3.1934	-3.12404	-2.27983
4.64308	4.74465	4.91318	-3.5128	-1.25295	-2.2693
4.83352	5.03681	4.97777	-1.04687	-1.24936	-2.25598
6.73377	5.02504	4.99479	-1.50922	-1.52953	-2.22764
4.82096	5.07114	5.04216	-1.28454	-2.16167	-2.22566
6.68585	5.35963	5.10561	-4.4328	-4.60778	-2.19783
5.026	5.21713	5.12892	-3.87327	-3.74663	-2.18652
7.20329	5.13406	5.15313	-4.40937	-2.92842	-2.1744
6.46949	6.63464	6.43482	-1.23208	0.190072	-2.17319
8.86857	8.9059	8.99374	-2.09554	-3.16534	-2.17102
			-3.57144	-3.4448	-2.16726
			-2.19716	-2.07418	-2.13451
			-2.56464	-3.14548	-2.12839
			-3.51909	-0.842322	-2.1149
			-4.19912	-4.17765	-2.10702
			-4.52871	-4.41326	-2.10482
			-2.05755	-0.639572	-2.04224
			-3.14586	-2.0304	-2.03242
			-3.3974	-1.3299	-2.00073
			-2.65476	-2.5393	-1.98213
			-1.8396	-2.81808	-1.97609
			-1.70936	-1.64546	-1.97517
			-3.65208	-2.82705	-1.96449
			-3.38902	-2.36486	-1.93821
			-1.94707	-2.02717	-1.92768
			-3.60729	-3.58582	-1.92714
			-1.73545	-1.56728	-1.92557
			-1.44308	-2.29044	-1.91145
			-3.02363	-0.982661	-1.91019
			-2.06038	-4.04247	-1.89594
			-2.35989	-0.745297	-1.861
			-0.934865	-2.25376	-1.83274
			-1.90019	-0.968807	-1.83028
			-2.97485	-4.50406	-1.82406
			-2.92817	-1.91422	-1.81473
			-1.6895	-1.63065	-1.78779
			-2.46912	-2.37182	-1.78613
			-0.320259	-2.18543	-1.73587
			-1.74381	-2.53911	-1.72914
			-2.41715	-2.84483	-1.71558
			-1.33895	-0.121058	-1.70659
			-3.37892	0.554567	-1.69923
			-2.01905	-1.48337	-1.65574
			-1.71047	-1.59501	-1.65534
			-2.07709	-2.76605	-1.65467
			-1.77291	-2.90401	-1.63707
			-1.68661	-1.1001	-1.63058
			-1.58884	-0.616341	-1.62776
			-1.29919	-0.177229	-1.62281
			-0.878458	-1.82477	-1.61674
			-1.90616	-3.48581	-1.569
			1.23741	-1.28286	-1.55481
			-0.946809	-0.541311	-1.54699
			-3.04864	-1.97489	-1.52946
			-1.99258	-1.99014	-1.52503
			-1.73526	-1.00622	-1.52101
			-2.2169	-3.91657	-1.50663
			-3.0992	-3.17084	-1.48901
			-1.21911	-3.1985	-1.48782
			-1.4737	-0.954246	-1.46979
			-2.53158	-0.457514	-1.46893
			-3.89277	-1.50714	-1.46529
			-0.812009	-1.75831	-1.46252
			-2.44401	-1.0016	-1.43589
			-2.30499	-3.38684	-1.41916
			-3.10405	-1.42916	-1.4173
			-1.90829	-1.23844	-1.41126
			-3.28462	-1.64228	-1.40058
			-1.94483	-1.14099	-1.39711
			-2.48671	-1.95973	-1.37771
			-2.97485	-3.55569	-1.37413
			-1.77708	-1.99665	-1.36172
			-1.26872	-3.50879	-1.34908
			-2.55493	-2.20357	-1.33853
			-4.31926	-2.64436	-1.32744
			-0.655981	-2.22198	-1.32613
			-1.56165	-1.98067	-1.30096
			-2.63485	-1.90268	-1.29916
			-1.99688	-2.02789	-1.29532
			-1.32392	-1.85257	-1.29063
			-1.48863	-2.21244	-1.2801
			-1.25234	-1.67867	-1.26827
			-2.35057	-3.91657	-1.25459
			-2.65618	-1.63652	-1.2371
			-2.44582	-2.56725	-1.23408
			-0.261846	-0.834707	-1.22829
			-0.724057	-1.44011	-1.22487
			-1.40191	-1.2791	-1.20944
			-1.41858	-1.4725	-1.20653
			-1.09773	-1.50977	-1.16748
			-2.3407	-0.31543	-1.16399
			-2.82831	-0.313999	-1.14575
			-1.09667	-1.90071	-1.12654
			-1.14661	-0.79688	-1.09969
			-2.99285	-1.58287	-1.0972
			1.86116	0.69799	-1.08882
			-0.962	-0.864229	-1.08267
			-0.941359	-3.57694	-1.06738
			-2.13221	-0.1525	-1.02764
			1.76465	-0.341728	-0.989891
			-1.10148	-1.73626	-0.967299
			-1.61159	-1.24229	-0.939213
			-0.480977	-2.19102	-0.92318
			-0.558558	-1.0245	-0.896698
			-0.618683	-0.137033	-0.880921
			-4.3601	-3.28509	-0.879916
			-1.33404	-1.98004	-0.843178
			-0.587391	0.218101	-0.842572
			-1.30806	-1.2743	-0.82469
			-1.34637	-1.55294	-0.808242
			-0.516106	-0.207931	-0.795852
			-0.967599	-0.751695	-0.794505
			-2.394	0.0266199	-0.714771
			-4.27351	-2.14962	-0.65411
			-0.753751	-2.41051	-0.636876
			-1.65061	-1.48731	-0.619412
			-0.436922	-1.82248	-0.617946
			-0.332903	-0.780032	-0.617243
			0.956768	-0.0989968	-0.594951
			-1.27158	-0.668539	-0.591591
			-0.741959	-2.82205	-0.578411
			-1.28148	-1.44172	-0.57287
			-1.00264	-1.10499	-0.564346
			-1.17593	-2.03036	-0.55225
			-0.537776	-0.545831	-0.54129
			-0.916225	-0.709343	-0.522976
			-0.695452	-0.95777	-0.496263
			-0.46725	-0.0770058	-0.493116
			-0.765654	-1.4725	-0.491755
			-0.0906697	-0.749872	-0.460419
			-3.48944	-1.39777	-0.390362
			-0.764449	-1.8364	-0.36988
			-3.61152	-0.9429	-0.349528
			-0.947683	-3.06266	-0.334821
			-0.814411	-0.954603	-0.293787
			-0.489122	0.03436	-0.276647
			-0.87277	0.640237	-0.262291
			-2.71556	-1.20162	-0.248031
			-1.86384	-0.533143	-0.235699
			-0.587727	-1.67807	-0.210454
			0.310294	0.258831	-0.167806
			-1.74696	-2.72554	-0.165071
			0.394414	0.236939	-0.162056
			2.29952	0.204134	-0.161431
			-1.95051	-1.07389	-0.117233
			-0.798541	-0.444786	-0.1129
			-2.50741	-0.337757	-0.0842833
			-0.0796361	-2.71283	-0.0541446
			-1.30317	-1.74033	-0.0360441
			-0.342672	-0.522925	-0.0246704
			-3.82588	0.615099	0.00404143
			0.0254151	-1.01994	0.0211695
			-1.38208	-0.852876	0.10673
			-0.127504	-0.649345	0.108938
			-0.137693	-0.364958	0.135015
			-1.34752	-1.42098	0.142785
			0.294898	-0.476201	0.326314
			-0.147054	1.82585	0.376939
			2.08335	1.20535	0.400385
			0.875358	0.839067	0.423948
			-0.176172	-0.853007	0.473065
			-1.78041	-0.459203	0.499167
			-1.64276	1.2694	0.506993
			-1.60885	1.41399	0.509902
			3.74317	2.5008	0.515808
			0.282729	0.233486	0.554735
			0.605764	0.53463	0.640093
			0.89901	0.959941	0.665255
			0.0612023	0.595175	0.668777
			-0.633195	1.8645	0.852098
			0.616916	0.815482	0.872362
			0.434666	1.24374	0.880684
			0.476306	0.551512	0.926368
			0.899148	0.847764	0.947014
			-0.672808	1.75369	0.953261
			1.31504	1.56711	0.977093
			0.69995	0.796458	1.01811
			1.0463	0.92545	1.12103
			1.38873	0.762367	1.26871
			0.643294	0.825508	1.32949
			1.27191	1.44118	1.35567
			0.377218	0.92781	1.36984
			2.56714	1.17261	1.37254
			2.371	1.45386	1.37562
			0.682216	1.48845	1.39322
			1.94793	2.32497	1.57128
			-1.96676	1.87793	1.57412
			1.80738	1.8122	1.79987
			2.39288	1.26424	1.87746
			-2.28996	2.47242	1.89673
			1.93136	2.16926	1.98588
			1.62547	1.91265	2.02261
			1.80867	2.13398	2.24999
			2.79014	2.55794	2.29342
			1.61642	2.22389	2.40637
			1.83048	2.73122	2.43148
			2.7253	2.59759	2.52577
			2.29848	2.275	2.56567
			0.909207	3.16821	2.7064
			2.73677	2.79833	2.7342
			2.45658	1.95315	2.74412
			2.55868	2.34932	2.90912
			3.2039	2.93027	3.08117
			4.22578	3.75218	3.08662
			3.16733	3.63925	3.16423
			3.52364	3.34412	3.2854
			3.15524	3.05839	3.29185
			5.20818	4.02619	3.30398
			2.92284	3.41027	3.33531
			4.2356	3.70079	3.36841
			2.13516	3.79608	3.67647
			4.04886	3.86476	3.82929
			3.91015	3.67329	3.90995
			3.85812	4.29166	3.95145
			4.10473	4.02538	3.96077
			4.4966	4.36589	4.05362
			4.33054	4.16858	4.07825
			5.01251	4.05398	4.13899
			4.27008	4.44379	4.31969
			4.33632	4.2909	4.33889
			4.18519	4.34918	4.36176
			5.7265	4.12891	4.43957
			4.3538	4.55542	4.47427
			4.78912	4.46403	4.48912
			5.54859	4.99455	4.49245
			4.95686	4.60627	4.68137
			6.05032	4.45056	4.73264
			5.06782	5.32251	4.94335
			4.87766	5.14897	4.9804
			5.12679	5.13144	5.16071
			4.91755	5.12024	5.20409
			5.2515	4.99971	5.23404
			5.48147	5.50272	5.23449
			5.46391	5.63205	5.43901
			5.46591	5.61479	5.4463
			5.21953	5.30576	5.46744
			5.34384	5.45342	5.47095
			5.52817	5.71398	5.47494
			5.48908	5.73502	5.51548
			5.75382	5.44819	5.53414
			5.53926	5.60344	5.5343
			5.59179	5.62901	5.55038
			5.30183	5.55453	5.56188
			3.35395	6.31495	5.62299
			5.43723	5.93289	5.6321
			5.80852	5.72605	5.64671
			5.47852	5.86596	5.66431
			5.88595	6.11833	5.66906
			5.7012	5.6715	5.6711
			5.70334	5.79748	5.73986
			5.85555	5.91489	5.76003
			5.61747	5.60955	5.79268
			5.6612	5.68923	5.79294
			5.80973	5.94702	5.80514
			5.89103	5.91296	5.9119
			5.86664	5.88038	5.9144
			5.82991	6.07098	5.92571
			5.81755	5.95097	5.92695
			5.71152	5.90739	5.967
			5.85427	5.86227	6.07202
			5.96651	5.95931	6.13488
			5.09138	5.93635	6.13557
			6.29223	5.69675	6.1552
			6.10636	6.28984	6.2018
			6.33869	6.43259	6.26674
			6.2306	6.43792	6.29752
			5.9052	6.25132	6.33048
			6.39593	6.61846	6.33884
			6.50196	6.58437	6.37166
			6.37182	6.60957	6.39993
			6.42872	6.32107	6.40631
			6.46296	6.39696	6.42717
			6.52522	6.58295	6.44576
			5.65883	5.68073	6.44781
			6.68268	6.48308	6.48381
			6.48435	6.5129	6.56053
			6.71834	6.88193	6.64375
			6.63914	6.73227	6.70612
			6.83	6.90822	6.76978
			6.69272	6.76117	6.90109
			6.74959	6.81473	6.90207
			6.95548	7.0566	6.95498
			6.85107	7.15415	7.00062
			7.14019	7.2756	7.09006
			7.34014	7.49391	7.27227
			7.28013	7.39362	7.31444
			7.64617	7.38195	7.41935
			6.62564	7.57706	7.69098
			7.82342	8.04928	7.96372
			7.88558	8.09848	8.09251
			8.13176	8.15273	8.16097
			8.3625	8.23545	8.5137

## Sheet: Fig6A
rp49	EGFP RNAi-1	0.00915817
		0.00761461
		0.0728155
	enok RNAi-1	0.00774617
		0.00823376
		0.0063149
cl1-A	EGFP RNAi-1	1.18125
		0.965679
		1.26548
	enok RNAi-1	0.20131
		0.147165
		0.173822
cl1-32	EGFP RNAi-1	0.454304
		0.340235
		0.507187
	enok RNAi-1	0.130884
		0.0874511
		0.0978535

## Sheet: Fig6C
ED-SL		EI-SL		RI-SL
GFP_KD	enok_KD	GFP_KD	enok_KD	GFP_KD	enok_KD
1.4053	-0.547296	2.19885	-0.547296	1.08337	0.452704
2.66833	0.452704	1.95784	-1.13226	2.66833	0.452704
-0.653594	-1.86922	2.4053	0.452704	-0.916629	0.452704
1.47569	-1.13226	1.4053	-2.13226	0.668334	-0.547296
1.89073	-1.5473	0.0833714	0.452704	3.4053	1.4527
1.4053	0.452704	1.08337	-2.13226	1.5428	0.452704
-0.916629	0.452704	0.0833714	-0.547296	0.0833714	0.452704
0.498409	0.452704	2.08337	0.452704	-1.91663	-0.547296
0.498409	-0.869224	2.89073	-0.547296	-0.916629	-0.547296
0.445942	-0.284262	0.0833714	0.452704	1.30576	2.03767
1.82034	2.03767	1.08337	0.452704	1.08337	0.452704
1.08337	-1.13226	1.08337	0.452704	-0.916629	0.452704
1.08337	0.452704	-0.653594	-1.86922	0.0833714	-0.547296
0.568798	-0.547296	-0.916629	0.452704	1.66833	-1.86922
1.89073	0.452704	1.08337	0.452704	1.08337	0.452704
1.66833	-0.132259	-1.33167	-2.71722	0.0833714	0.452704
2.08337	0.452704	0.0833714	-1.13226	1.08337	0.452704
0.498409	0.452704	-1.50159	0.452704	-1.23856	-0.547296
1.66833	0.452704	0.0833714	0.452704	2.4053	0.452704
0.931368	0.452704	-0.238557	-2.13226	2.08337	0.0376661
1.2533	2.77463	0.0833714	-2.86922	0.668334	-0.769689
2.99026	-0.717221	-0.402055	-0.547296	4.08337	2.03767
1.5688	-0.547296	1.08337	-0.547296	1.08337	0.452704
1.08337	1.77463	0.820337	1.4527	0.0833714	0.452704
0.346406	0.189669	2.19885	-0.547296	0.276017	0.130776
-0.617068	-0.547296	2.08337	-0.547296	2.19885	2.4527
2.08337	1.4527	0.4053	-0.869224	1.66833	-0.547296
1.66833	0.452704	2.08337	-0.132259	-0.139021	-1.42177
1.08337	0.452704	1.66833	-0.132259	1.66833	1.4527
-0.238557	-1.5473	1.66833	0.452704	0.372878	-0.869224
2.4053	-0.132259	-0.916629	-0.547296	-1.72398	1.77463
1.5428	2.4527	2.66833	-0.132259	0.957841	2.03767
-0.916629	1.4527	1.66833	-0.547296	1.5428	2.77463
1.49841	1.03767	2.4053	0.452704	3.08337	1.77463
1.19885	0.230311	-1.23856	-0.547296	-0.501591	-0.547296
1.93137	3.03767	1.49841	-1.5473	-0.916629	-0.0327232
1.89073	0.130776	-0.653594	-1.13226	0.498409	0.452704
1.66833	1.4527	-0.916629	-1.13226	-0.331666	-1.5473
-0.139021	-0.869224	1.66833	0.452704	-1.50159	1.4527
1.66833	0.774632	1.08337	0.452704	3.2533	0.867741
-1.50159	2.03767	0.668334	0.452704	0.0833714	0.452704
1.76144	1.03767	-2.23856	-2.5473	0.0833714	2.03767
0.783811	-0.547296	-0.916629	0.452704	-0.916629	0.452704
1.4053	0.452704	-0.331666	-0.547296	1.66833	0.867741
2.4053	1.18967	1.2533	-0.547296	0.0833714	-2.35465
-0.331666	0.452704	1.08337	-0.547296	0.0833714	1.4527
0.0833714	0.452704	-0.916629	-1.5473	0.0833714	0.452704
3.2533	0.230311	2.66833	0.452704	0.4053	-0.769689
1.66833	1.03767	0.931368	-1.71722	-1.91663	2.03767
1.66833	2.77463	0.0833714	-2.35465	1.78381	0.715738
3.83826	1.26006	0.0833714	0.452704	-1.50159	1.4527
1.55286	-0.440381	-1.13902	-1.13226	0.820337	1.4527
2.66833	2.4527	0.498409	0.452704	1.66833	2.03767
1.89073	0.675096	0.276017	-1.86922	1.08337	2.4527
1.4053	-0.132259	1.84891	-0.869224	1.66833	1.4527
0.597945	-0.869224	1.66833	1.4527	2.08337	0.0376661
1.08337	0.93813	0.761443	0.452704	1.30576	-0.962334
-0.331666	2.03767	1.52394	2.03767	1.08337	2.4527
0.913446	-0.324904	0.0833714	0.452704	-0.331666	0.452704
0.668334	1.4527	0.498409	-0.869224	0.0833714	-0.132259
0.761443	1.18967	1.66833	0.452704	0.931368	1.6751
-1.13902	0.867741	1.08337	0.452704	1.08337	2.26006
-0.809713	0.230311	0.957841	-0.547296	0.0833714	2.4527
-1.72398	-0.284262	0.820337	-1.13226	-1.50159	-1.86922
0.0833714	2.4527	2.08337	1.03767	1.08337	-0.0327232
-0.501591	-0.869224	0.761443	0.452704	1.95784	2.03767
1.91987	0.867741	1.08337	-1.5473	1.18291	0.260059
1.43129	0.452704	-0.109274	-0.547296	3.5428	1.77463
1.08337	1.4527	1.08337	1.4527	0.0833714	2.77463
0.761443	1.4527	1.66833	0.452704	1.08337	-0.547296
0.711403	-0.646832	0.346406	-1.13226	0.0833714	-0.00672798
-0.916629	1.4527	-0.916629	1.4527	0.957841	0.3152
1.22087	1.4527	1.66833	1.03767	0.253296	0.675096
1.08337	1.4527	2.66833	-0.547296	1.3313	-0.284262
0.62394	0.0901336	-0.916629	0.452704	-0.501591	-1.71722
1.08337	-0.00672798	0.890726	0.452704	3.5428	0.452704
1.66833	-0.132259	1.89073	-0.132259	0.890726	0.0376661
3.08337	0.675096	0.820337	2.03767	0.668334	2.4527
0.668334	0.130776	2.4053	0.452704	2.08337	3.03767
-0.501591	0.452704	0.498409	-0.547296	-1.12308	-1.02123
4.3313	0.452704	-0.0865536	-0.769689	1.08337	1.4527
0.668334	-0.225368	0.668334	-1.5473	2.47569	0.715738
-0.0686317	-0.827404	-0.501591	-0.132259	1.66833	-0.395293
0.53083	0.0376661	2.08337	-0.547296	0.597945	-0.0327232
-0.238557	-0.199373	1.49841	1.4527	-0.0321058	-1.13226
-0.916629	0.452704	1.66833	0.452704	1.08337	2.03767
1.51633	0.452704	3.4053	-0.769689	-0.402055	0.0376661
2.4053	2.03767	-1.50159	-1.35465	0.45534	-0.0778111
0.372878	0.867741	-0.109274	-0.132259	1.47569	1.32717
0.820337	0.867741	0.0833714	0.452704	0.890726	0.867741
0.799578	0.282779	0.0833714	-0.547296	0.860979	0.10478
3.17083	0.867741	0.0833714	0.452704	2.4053	0.867741
1.08337	-0.769689	1.22087	-0.284262	1.66833	-0.440381
1.08337	2.03767	2.30576	-0.717221	1.4053	-0.132259
2.99026	0.0376661	0.668334	-0.284262	1.4053	1.18967
1.66833	1.3007	1.08337	-0.284262	2.08337	2.03767
1.00937	0.774632	-0.331666	0.452704	1.66833	0.452704
0.890726	0.452704	1.49841	1.03767	-0.0865536	-0.0618695
1.66833	-0.132259	-1.33167	-0.132259	1.08337	3.03767
0.461883	0.452704	-0.402055	1.03767	0.890726	3.4527
3.63796	1.4527	-1.50159	-0.547296	1.30576	0.93813
1.08337	-0.0778111	2.66833	-0.547296	2.15376	2.77463
1.08337	3.26006	1.4053	-0.284262	1.89073	1.18967
0.346406	1.4527	0.668334	-0.132259	1.89073	1.4527
-0.501591	-0.869224	2.08337	0.452704	-1.50159	0.0376661
1.4053	3.77463	2.19885	-0.547296	2.82034	1.62263
0.445942	0.3152	0.931368	1.4527	0.346406	-0.284262
1.82034	0.0376661	0.542803	1.03767	-0.916629	1.4527
2.08337	2.62263	3.2533	-0.132259	1.08337	1.4527
1.4053	0.452704	0.735448	0.0376661	1.66833	0.452704
1.89073	1.91214	-0.653594	1.4527	0.0833714	-0.132259
1.5428	0.867741	2.08337	0.867741	1.1475	-0.184726
0.860979	1.91214	1.66833	0.452704	-0.0541321	-0.284262
2.4053	2.26006	2.66833	1.4527	1.2678	-0.0327232
2.2533	0.590207	0.0833714	0.452704	0.182907	-0.132259
1.2678	0.590207	-0.139021	-0.284262	-0.501591	0.0376661
1.5573	0.260059	0.0833714	0.452704	1.46188	2.18967
2.08337	0.93813	2.89073	0.0376661	1.82034	0.774632
2.08337	1.86774	1.66833	-1.13226	1.4053	0.230311
1.36348	1.62263	2.08337	1.4527	1.66833	1.3007
-0.331666	-0.132259	-0.653594	-0.547296	1.08337	0.675096
0.668334	0.967277	0.498409	-0.547296	2.4053	3.77463
1.57814	0.604707	-0.238557	-0.132259	0.860979	0.130776
0.0833714	0.590207	1.08337	0.452704	1.22087	0.604707
2.08337	0.130776	0.4053	-0.869224	1.66833	0.452704
0.0833714	0.130776	1.89073	-0.547296	0.498409	-0.421765
4.62769	0.452704	0.0833714	-0.284262	0.523944	0.604707
1.51633	0.337226	1.08337	1.03767	0.445942	1.86774
0.597945	0.211696	1.08337	0.867741	0.976456	0.815274
0.890726	0.189669	0.820337	2.03767	1.08337	1.4527
1.30576	0.645349	-1.23856	0.452704	3.4053	2.4527
2.4053	1.32717	-0.501591	2.03767	0.0833714	-0.704838
3.14227	2.4527	1.30576	-2.71722	1.89073	1.03767
0.220875	0.10478	0.346406	0.452704	1.08337	1.13078
1.82034	0.867741	0.0833714	0.452704	1.82034	0.300701
1.94135	1.4527	3.02197	0.130776	2.2533	2.4527
2.78381	0.452704	0.523944	-0.869224	0.668334	1.26006
-0.0161642	0.867741	-2.50159	0.452704	0.0833714	-0.284262
5.50964	0.867741	0.931368	-1.45419	0.761443	0.0376661
0.820337	1.18967	0.931368	-1.45419	0.263944	-1.19937
0.668334	-0.0327232	1.08337	1.03767	1.08337	2.03767
1.89073	0.774632	1.66833	2.03767	1.134	0.172596
0.0833714	-0.0947842	0.668334	-1.13226	2.66833	1.4527
0.346406	0.189669	0.668334	1.03767	0.4053	-1.13226
0.967894	0.452704	-0.402055	0.452704	1.2533	0.337226
1.66833	0.912135	1.95784	0.0376661	1.27602	1.18967
0.498409	0.74221	1.66833	-0.547296	0.820337	1.62263
1.86764	1.23031	2.66833	2.03767	1.91987	0.111667
1.08337	1.18967	1.89073	-0.869224	1.35639	2.35959
1.85596	0.831215	0.668334	-0.547296	1.76144	2.18967
1.30576	0.130776	0.0833714	-1.86922	2.08337	0.774632
1.01626	0.230311	0.4053	-1.86922	1.66833	0.452704
0.498409	1.4527	3.78381	1.03767	0.85389	1.03767
0.761443	2.56818	1.08337	1.4527	-1.91663	-0.547296
0.190287	-0.199373	1.66833	0.452704	0.890726	0.93813
1.93137	0.622629	0.668334	-1.13226	1.66833	0.774632
1.28501	0.983218	-1.91663	-1.5473	0.0833714	0.452704
2.66833	1.93813	3.2533	1.4527	1.78381	3.26006
1.76144	0.867741	-0.501591	1.4527	-0.352728	0.345788
0.668334	0.452704	0.0833714	-1.13226	0.693425	1.86774
0.820337	-0.210261	1.89073	0.452704	3.08337	2.03767
-0.916629	0.452704	1.84891	0.452704	0.4053	-0.395293
-0.279199	-0.0878647	-0.331666	-0.769689	2.4053	0.452704
1.4053	1.26006	0.597945	-0.284262	0.253296	2.4527
1.19885	1.93813	1.08337	-1.13226	0.913446	0.752264
0.668334	1.4527	1.30576	-0.284262	0.182907	-0.284262
1.4053	0.452704	0.860979	1.4527	2.19885	-0.454187
1.84891	0.0901336	1.14227	-0.0327232	0.431295	0.3152
-0.0686317	1.09013	2.08337	0.452704	0.198849	0.130776
0.431295	0.800627	0.0833714	1.4527	0.147502	0.130776
1.17853	0.272131	0.0833714	-0.547296	0.431295	0.0376661
1.2089	0.900163	0.276017	-0.354651	0.793865	0.0901336
0.761443	0.867741	0.568798	-0.547296	1.08337	1.03767
1.19029	0.345788	-0.653594	0.452704	-0.331666	0.715738
-1.2792	0.012131	0.0833714	0.452704	0.0833714	-0.354651
1.66833	3.26006	-0.238557	1.03767	1.5428	1.18967
1.82034	0.645349	1.4053	0.452704	-0.501591	0.452704
0.552857	0.912135	2.08337	1.4527	0.498409	1.62263
3.66833	1.10478	2.4053	1.4527	1.89073	2.77463
2.134	1.4527	3.4053	1.03767	1.4053	-0.547296
0.761443	1.6751	2.17083	-0.717221	-0.501591	1.4527
1.16137	1.56818	-0.916629	-1.35465	2.03757	2.21824
0.820337	0.189669	1.30576	0.867741	1.00937	0.752264
0.0833714	-0.0778111	1.08337	-0.547296	0.761443	1.77463
1.74634	0.559619	3.78381	0.130776	-0.916629	0.0376661
0.165834	-1.13226	4.66833	2.4527	-1.13902	3.26006
2.17083	3.62263	0.498409	-0.547296	0.668334	1.56818
3.66833	1.71574	3.2533	0.452704	0.0833714	0.189669
3.08337	1.03767	0.542803	-0.132259	-0.37606	0.715738
0.346406	0.645349	0.0833714	0.452704	0.552857	-0.440381
1.27602	0.568181	0.346406	2.03767	0.931368	3.77463
0.931368	2.4527	1.08337	2.77463	-0.196736	2.26006
1.76144	0.715738	2.2533	0.0376661	0.580871	0.815274
-0.238557	0.0376661	1.66833	0.452704	1.5688	1.4527
1.22087	2.21824	0.820337	1.4527	0.0833714	-0.0778111
-0.447143	0.74221	-0.501591	-0.132259	0.820337	0.590207
2.08337	2.21824	0.820337	-0.547296	2.08337	1.26006
4.02197	0.774632	1.08337	-0.869224	1.86098	2.03767
2.15376	1.37024	-0.916629	1.03767	0.53083	0.74221
2.00394	0.452704	0.668334	-0.547296	1.134	0.189669
3.2533	2.03767	1.08337	1.4527	1.08337	1.4527
0.85389	0.732812	1.89073	1.77463	2.08337	1.03767
0.668334	1.4527	1.78381	1.18967	1.4053	-0.354651
1.08337	1.86774	-0.916629	2.03767	1.69808	0.967277
0.668334	0.912135	-0.331666	-0.547296	1.28501	1.71574
2.21265	-0.810331	1.08337	0.452704	0.735448	1.71574
3.58587	1.4527	2.08337	0.452704	-0.723983	0.260059
2.45261	1.3007	2.82034	0.452704	1.28982	1.03767
0.263944	-0.0212276	1.49841	1.4527	0.0833714	0.452704
0.761443	1.71574	-0.916629	1.4527	1.4053	1.4527
1.84891	0.983218	1.95784	-1.13226	-0.67562	-0.0327232
4.17083	2.03767	0.0833714	2.4527	1.34641	0.74221
1.2533	1.1632	2.28501	0.230311	-0.419129	-0.498387
1.36348	0.337226	-0.139021	-0.132259	0.945868	2.91214
2.36348	2.21824	1.08337	2.03767	-0.402055	2.26006
4.12777	1.62263	3.78381	2.77463	-0.00973797	2.13078
0.0833714	0.983218	0.0833714	-1.24774	0.871867	1.4527
0.902799	0.282779	2.89073	1.03767	1.1475	-0.691686
-0.54466	-0.160273	0.0833714	0.452704	0.220875	-0.640406
1.30576	0.0376661	2.30576	-0.547296	1.33713	2.03767
0.990262	1.13078	1.08337	-0.547296	0.0162572	0.327173
1.49841	-0.199373	-0.238557	2.03767	2.08337	1.4527
1.91987	1.62263	1.4053	0.130776	0.931368	0.452704
3.02197	1.32717	0.668334	-0.132259	0.735448	0.25107
0.267796	0.893276	-0.916629	0.867741	-0.270266	0.115669
4.66833	2.26006	1.5428	1.4527	1.86098	1.9552
2.55286	0.230311	0.820337	0.452704	-0.0421595	-0.247736
1.35346	1.00019	1.08337	1.4527	-0.114568	-0.364432
1.134	1.08073	0.542803	3.03767	0.835444	0.0376661
0.85389	-0.210261	0.597945	-0.132259	0.190287	0.900163
2.00937	2.9552	2.4053	0.867741	1.13068	0.700631
0.346406	1.13078	0.498409	-0.810331	1.97646	-0.00672798
0.668334	1.4527	1.08337	1.4527	0.890726	0.645349
1.19885	-0.646832	3.99026	0.452704	2.78381	1.86774
1.79958	1.89328	0.276017	2.03767	1.53083	0.452704
0.890726	1.77463	1.66833	2.03767	1.49841	0.774632
4.2533	2.03767	1.89073	0.452704	3.5428	0.774632
4.5428	3.4527	0.0833714	0.0376661	1.66833	0.327173
0.372878	-0.354651	-0.501591	0.0376661	1.83826	1.07419
1.94135	2.4527	2.66833	2.77463	1.0403	0.189669
1.95784	0.912135	2.4053	0.452704	2.99026	0.867741
0.876921	0.700631	1.4053	1.77463	-0.186718	-0.381286
2.74634	1.37024	2.08337	0.774632	1.5428	0.774632
0.445942	1.3152	0.0833714	0.867741	0.24687	0.545813
1.30576	0.922189	2.66833	2.03767	0.976456	0.675096
3.14227	1.3007	0.0833714	-0.547296	-0.331666	0.831215
1.91987	0.752264	0.182907	1.03767	1.08337	0.675096
1.16137	2.26006	-0.916629	-1.13226	0.0833714	0.452704
0.0833714	2.03767	2.2533	0.452704	0.879838	0.687169
0.639765	0.359594	1.99026	-0.717221	0.568798	1.32717
1.28501	1.3152	-0.0865536	0.452704	-0.501591	0.130776
0.150486	0.3152	1.08337	0.0376661	2.61942	1.77463
0.281311	0.0901336	-0.501591	0.867741	-2.23856	1.03767
1.08337	0.578235	-0.501591	0.230311	-0.179663	-0.634759
0.337128	-0.395293	-0.331666	1.03767	0.848906	-0.836803
1.30576	0.530706	0.668334	0.452704	3.08337	1.4527
1.00937	3.18967	2.08337	2.4527	0.0833714	0.867741
1.79386	0.545813	1.08337	0.130776	0.431295	0.633276
1.49841	0.559619	2.4053	-1.86922	3.08337	0.93813
-0.482226	0.074192	0.346406	0.774632	1.36877	1.16891
0.461883	0.824672	1.4053	0.452704	2.08337	0.452704
1.81272	0.157248	2.2533	-1.5473	1.37288	0.831215
0.976456	1.34579	1.08337	-1.4733	1.0449	-0.0420611
0.770214	-0.547296	0.0833714	2.03767	0.498409	-0.312831
2.15376	1.91214	-1.50159	1.03767	0.902799	0.378703
0.860979	1.28278	1.46188	3.03767	1.7208	0.353168
1.36348	1.74221	2.74634	0.452704	0.769263	0.604707
0.613886	-0.395293	-0.179663	0.452704	2.08337	0.815274
0.890726	1.18967	-1.37606	1.4527	0.890726	-0.939614
0.871867	0.345788	1.49841	1.03767	0.542803	1.3007
1.23537	1.55224	-0.109274	-0.769689	1.0449	0.25107
2.4053	0.74221	1.08337	-0.132259	0.4053	0.260059
2.0309	1.84502	1.27602	0.0376661	-0.402055	0.260059
0.668334	0.282779	1.08337	2.03767	1.17083	1.2892
0.783811	0.391303	0.235375	0.715738	0.809196	1.18967
0.820337	1.10478	1.08337	0.452704	0.346406	-0.377371
1.82034	3.70063	2.89073	2.03767	0.838259	0.867741
4.52078	0.578235	2.2533	0.0376661	0.305764	0.300701
0.0389773	-0.210261	-0.279199	-0.869224	0.0438431	-0.225368
6.14946	1.03767	0.820337	2.4527	-0.151094	1.2412
1.0502	1.51683	1.08337	-0.132259	2.08337	1.71574
4.95784	2.91214	1.66833	0.452704	0.848906	1.4527
1.00091	0.452704	4.4053	1.26006	0.938982	1.5116
-0.783362	-0.667591	0.668334	0.93813	0.483909	0.700631
0.445942	-0.242442	1.49841	0.230311	0.990262	1.4527
1.59239	1.03767	0.820337	0.452704	0.53083	1.03767
1.02679	0.637128	1.66833	-0.0327232	0.512215	-0.0327232
1.08337	3.03767	-0.501591	1.4527	0.549035	0.163197
0.913446	-0.488403	1.08337	0.452704	0.913446	1.5116
1.08337	0.654337	1.27602	1.18967	0.604204	0.341672
1.38593	0.545813	0.0833714	1.4527	0.53083	0.211696
0.727228	1.53071	0.0833714	0.130776	1.66833	0.831215
3.82753	0.967277	-1.91663	-1.35465	3.17083	0.659155
0.771427	0.391303	4.08337	0.93813	0.0833714	-0.0778111
1.46188	1.71574	0.957841	-0.440381	1.74048	2.83122
0.783811	1.18967	4.60693	1.26006	1.57814	0.687169
0.809196	0.715738	0.0833714	0.452704	1.4053	1.3007
5.47569	4.15314	1.22087	0.867741	0.470395	-0.739941
0.945868	1.4527	-1.13902	-0.132259	0.314697	0.0901336
1.66833	1.34579	1.08337	0.452704	0.182907	0.157248
1.86098	0.905216	1.66833	0.452704	1.17083	1.26006
0.739417	0.0238603	1.4053	-0.547296	1.18291	1.3787
0.842363	0.604707	1.08337	-1.35465	1.00091	2.34579
1.66833	1.56818	2.66833	-0.547296	1.4053	2.13078
0.720801	0.848632	3.08337	2.03767	1.72723	0.967277
0.683764	0.345788	0.820337	1.77463	2.2533	1.74816
0.440923	0.0376661	2.2533	0.452704	1.27602	1.50715
0.820337	0.831215	2.08337	0.0376661	2.08337	2.62263
1.19885	1.77463	2.30576	0.675096	-0.627122	-0.247736
1.28501	0.659155	2.4053	1.4527	-1.65359	0.774632
2.66833	0.867741	-0.457197	-0.925808	0.498409	1.62263
0.957841	0.230311	1.18291	-0.284262	-0.579594	0.757558
1.28131	1.16891	0.820337	0.715738	-0.331666	-0.132259
0.346406	2.3913	0.820337	1.26006	0.783811	0.179685
0.597945	-0.284262	3.4053	2.77463	1.08337	0.578235
0.746336	2.3787	2.66833	0.452704	1.58587	1.83122
5.18891	2.11567	1.08337	2.03767	0.793865	0.147849
0.260249	0.246253	1.08337	0.452704	0.0833714	-0.909866
1.00937	0.728338	1.30576	0.93813	2.08337	0.774632
0.855961	0.332409	1.66833	1.03767	0.4053	0.867741
1.22087	3.26006	0.848906	-0.646832	1.17648	1.55962
1.55286	1.0091	-0.916629	-0.199373	-0.126846	-0.670679
1.39149	0.800627	1.08337	0.452704	1.32041	0.563735
1.83061	1.88566	-0.916629	0.452704	2.04273	1.24625
0.626514	0.295162	2.08337	0.452704	1.27602	0.715738
0.578136	1.15314	1.66833	1.77463	-0.5947	2.56818
2.0309	1.74816	2.89073	2.03767	1.32041	0.505171
0.931368	0.700631	1.66833	1.18967	1.08337	1.03767
0.597945	2.20759	-0.916629	2.03767	1.13782	0.374701
0.86578	0.452704	2.30576	1.4527	1.32438	3.03767
0.617708	0.452704	1.95784	0.189669	1.15049	0.305862
1.69808	0.223222	0.890726	-0.284262	1.08337	2.77463
2.04685	1.01213	-0.157637	-2.13226	1.62394	1.24625
1.28501	0.752264	0.0833714	0.452704	0.0833714	0.282779
0.157372	0.523093	0.890726	-1.24774	1.89073	0.130776
0.4053	-0.0916169	1.30576	1.4527	1.22776	0.282779
1.30576	1.3152	0.53083	1.26006	1.2533	1.51683
2.11312	1.15314	1.08337	-0.547296	1.08337	3.15314
1.32041	1.83122	0.568798	0.0376661	1.74634	1.73281
1.30576	2.59021	1.84891	-0.284262	1.2533	1.77463
0.810353	1.14076	0.208902	-0.925808	0.668334	-0.0618695
1.52394	2.10478	2.5428	1.77463	-0.411393	-0.571958
1.38593	0.684029	-1.23856	1.4527	2.2533	1.10478
1.51947	1.90016	1.2533	2.77463	0.585872	-0.218674
1.58587	1.4527	-0.238557	0.130776	0.0833714	1.4527
1.35346	0.505171	1.08337	1.4527	0.941352	1.13078
2.08337	2.35959	0.585872	1.4527	-1.91663	0.230311
0.357546	0.074192	1.89073	0.867741	1.47039	0.130776
1.82034	1.6751	1.66833	1.6751	0.32438	0.211696
1.49055	0.356488	0.783811	0.715738	0.05095	-0.345663
1.30576	0.715738	1.95784	3.03767	1.02197	1.50715
0.388226	-0.377371	2.4053	2.03767	0.783811	2.13078
1.08337	0.988757	0.0833714	-0.284262	1.13782	1.80634
2.0309	1.56818	0.4053	0.452704	0.190287	0.793741
4.47569	2.35959	0.820337	0.230311	3.66833	1.15314
1.5688	1.4527	2.30576	1.03767	1.2533	1.5116
0.820337	0.715738	2.2533	0.452704	0.642799	0.559619
1.7558	1.77463	3.2533	0.867741	1.95784	2.77463
1.44092	2.82194	1.52394	1.86774	0.617708	0.300701
1.08337	1.59955	-0.916629	1.4527	1.72723	1.00019
1.63796	1.08497	0.967894	-0.662774	0.597945	1.4527
1.69635	0.821937	-2.50159	0.774632	-0.916629	-0.395293
5.91626	1.71574	0.498409	1.18967	1.38293	1.77463
1.96789	0.93813	2.89073	1.18967	-0.288597	-0.498387
1.4793	0.599545	1.89073	3.03767	0.542803	0.0521657
2.66833	1.94747	3.08337	2.03767	1.4053	2.40024
1.45534	1.4069	0.761443	0.867741	3.08337	0.867741
0.619424	1.31068	0.346406	0.0901336	0.517774	0.0541543
1.53403	1.55224	2.17083	0.867741	0.931368	2.32717
1.28982	0.774632	1.2533	0.0376661	-0.238557	0.824672
0.923893	0.3152	0.372878	-0.0327232	0.276017	0.452704
0.289822	1.03767	0.711403	0.452704	1.22087	0.452704
0.301552	-0.841028	2.08337	2.77463	-0.777652	-0.993096
4.5428	1.93813	-0.501591	1.77463	1.91987	2.09656
0.32438	0.988757	1.2533	1.18967	1.86098	1.3007
1.46188	1.4527	1.27602	0.189669	1.28501	1.03767
0.627692	1.06039	0.276017	-0.662774	0.523944	0.633276
0.864731	0.130776	1.08337	0.867741	0.668334	1.10478
1.70396	0.0951516	-0.139021	0.0376661	0.45534	0.583948
0.617708	-0.00672798	3.4053	1.18967	2.66833	2.18967
0.451103	0.452704	-0.501591	1.6751	0.957841	0.659155
0.973189	0.130776	1.4053	0.452704	0.498409	1.2892
2.62769	2.11567	1.79958	-0.247736	1.5573	1.4069
1.56142	1.14076	0.0833714	2.03767	-0.164556	0.70646
-0.114568	-0.304025	1.66833	-0.132259	-0.0128439	-0.171787
1.08337	0.130776	1.66833	-0.354651	0.576411	0.405398
0.842363	0.282779	2.66833	0.715738	0.803264	1.3007
1.08337	1.03767	1.46188	0.715738	1.66833	0.452704
1.73705	0.327173	0.4053	2.03767	0.691054	0.260059
0.805837	-0.175328	0.253296	-0.962334	1.32438	2.55224
1.13782	0.452704	0.0833714	2.03767	1.33491	0.947468
0.766181	0.0376661	0.890726	-0.547296	0.990262	0.774632
0.651655	0.10478	1.66833	2.26006	0.691054	0.583948
1.49841	0.74221	-1.91663	-0.547296	1.34641	1.70063
2.08337	2.18967	0.668334	0.452704	1.053	0.883338
1.28268	-0.146758	1.08337	-0.547296	1.08337	1.70063
1.59033	0.367815	1.73545	0.0376661	2.08337	2.70063
0.650412	0.287644	0.957841	-0.440381	1.89073	1.36524
1.00742	0.0483134	-1.50159	1.4527	1.98149	1.50001
0.208902	0.58597	1.66833	1.4527	-0.431202	-0.0497967
0.0833714	0.497098	2.89073	0.452704	1.03757	1.1726
0.795569	-0.390571	1.66833	0.867741	0.000909269	0.362506
1.12085	2.28278	0.957841	-0.247736	0.552857	0.452704
2.56645	0.787123	0.820337	-0.132259	0.900507	0.752264
0.931368	1.99327	2.08337	1.03767	-0.216189	0.00204222
0.276017	1.4527	0.0833714	0.0376661	0.498409	0.0783081
0.393712	0.300701	0.668334	-0.132259	0.31164	-0.225368
1.96789	2.08497	-0.206135	-0.199373	0.871867	1.09656
1.08337	0.93813	1.5688	0.452704	0.4053	0.815274
0.464462	-0.0618695	1.66833	0.93813	0.0833714	0.523093
1.83339	1.86774	1.66833	-0.0618695	-0.604685	-0.925808
1.99764	2.37024	1.08337	0.452704	0.601839	0.403794
0.111941	0.0376661	-0.238557	0.452704	1.0309	0.983218
0.70486	0.955204	-0.501591	1.03767	0.943194	1.77463
1.79958	1.18967	2.5428	0.189669	0.150486	1.40024
0.498409	0.277617	-0.764625	-2.24774	0.398245	0.497098
-1.08655	0.922189	-0.331666	1.18967	0.617708	0.367815
0.23147	0.155722	0.253296	-0.6848	-0.723983	1.18967
0.35639	-0.184726	1.4053	1.03767	-0.292138	-1.44776
1.01924	0.495772	2.58587	0.675096	1.66833	2.03767
0.482979	0.0990667	0.0833714	0.774632	1.4053	2.2892
1.4053	0.254764	-1.13902	0.189669	-0.104256	-0.0391495
1.17959	0.535166	0.668334	0.867741	0.931368	0.552239
3.50484	2.77463	0.668334	-0.132259	1.22087	2.28278
0.983836	1.03767	1.49841	1.4527	1.36348	0.452704
1.44092	2.21824	0.931368	-0.962334	0.457767	0.215664
0.838259	0.804176	-1.13902	-0.547296	0.879838	0.693712
0.54804	-0.0102683	-1.69424	-0.909866	0.723829	0.211696
0.185733	-0.170733	0.957841	-0.225368	-0.109274	0.111667
1.35186	1.1632	1.08337	2.4527	0.354673	0.452704
1.93137	1.79666	0.498409	1.4527	1.77525	2.08073
0.0833714	0.707961	1.16137	1.3007	0.838259	1.0166
0.310142	-0.118453	1.08337	-0.547296	-0.143399	-0.568358
0.750796	0.492232	2.66833	0.452704	-0.29514	-0.817386
0.169101	-0.37221	-0.501591	0.452704	0.650412	0.253395
1.55544	0.755266	1.4053	0.93813	0.514006	-0.0681285
-0.0128439	-0.220486	1.66833	0.815274	0.230213	0.452704
3.4053	2.49223	1.4053	2.03767	1.39003	0.167301
4.08337	2.62263	0.437008	0.130776	1.1475	1.03767
3.02197	1.05677	0.0833714	1.4527	0.552857	1.28278
0.372878	-0.206259	0.220875	-0.324904	0.475689	1.10478
1.77369	1.03767	1.08337	1.4527	1.99026	1.39612
0.871867	0.912135	0.761443	0.867741	-0.357201	0.254764
0.117319	0.774632	1.89073	0.282779	1.08337	0.760826
1.30576	0.452704	-1.91663	0.452704	1.34641	1.18967
2.12777	1.14785	1.30576	0.452704	1.28773	1.88155
1.34117	1.4527	-0.179663	-0.739941	0.367164	0.0273978
0.620399	0.202725	0.305764	-0.547296	-0.410443	-0.172901
-0.431202	-0.0382827	-0.331666	3.03767	-0.510636	-0.275994
1.01182	1.00019	1.2089	-0.827404	-0.040011	-0.348751
1.32438	0.415229	-0.139021	-0.247736	0.687443	1.99702
0.506583	-0.869224	-0.331666	-0.547296	0.557303	0.179685
1.08337	2.12256	1.27602	0.452704	0.227761	0.542901
2.60693	1.88566	-1.23856	1.4527	0.76787	0.40831
1.3313	1.4527	-0.916629	0.867741	0.534033	0.282779
1.78381	0.831215	0.761443	0.452704	1.45261	0.633276
0.375552	0.693712	-0.723983	3.26006	1.7208	0.824672
0.644086	-0.0692491	1.66833	2.4527	-0.60252	-0.525923
0.305764	0.568181	-0.179663	-0.199373	0.820337	1.62263
1.81272	1.66216	1.08337	1.4527	0.0833714	-0.154979
2.2089	1.31944	0.498409	0.130776	-0.579594	0.912135
2.06609	0.738106	-0.5947	0.230311	0.668334	1.24625
0.305764	0.738106	0.0833714	-0.962334	0.860979	1.21824
3.08337	3.62263	2.08337	2.77463	0.4053	0.00791879
1.47823	1.41618	0.0833714	0.774632	-0.0515582	-0.184726
1.08337	2.27867	1.95784	0.93813	1.50787	1.4527
2.7114	2.37024	2.4053	1.13078	0.263944	0.793741
0.547319	1.25107	-1.33167	-1.35465	1.66833	2.26006
0.711403	0.955204	-0.431202	0.452704	0.198849	2.65434
0.431295	0.3152	0.820337	2.03767	0.105739	-0.547296
0.239491	0.282779	2.66833	0.675096	1.22087	1.06276
0.490547	0.220043	-0.916629	-0.132259	1.5428	1.3787
0.573177	-0.0833493	1.89073	0.130776	1.90934	2.03767
-0.159485	-0.269762	0.848906	-0.00672798	1.82034	0.365241
0.735448	-0.291457	0.0833714	1.4527	0.70486	0.604707
1.80584	1.34579	-0.809713	-1.45419	-0.46917	-0.370419
0.230213	0.599545	0.835444	-0.284262	1.93137	1.52309
1.31784	1.00019	3.89073	3.4527	0.431295	0.337226
0.588607	0.617763	-0.331666	2.03767	1.02197	0.774632
0.931368	0.730238	1.5688	-0.547296	1.24384	1.3747
0.948442	0.880125	-0.139021	2.77463	1.69481	1.75527
0.418974	0.494524	1.30576	1.26006	0.125192	0.069375
1.23865	1.3007	0.498409	2.03767	0.689092	0.785279
-0.29514	0.238579	0.4053	0.452704	0.498409	0.978772
3.2533	2.21824	1.08337	-0.199373	1.75322	0.839727
0.922907	1.0029	0.0833714	0.230311	0.810353	1.3787
4.5591	2.4527	1.66833	0.0376661	1.29282	1.00019
1.54495	-0.298269	1.08337	0.645349	-0.299957	-0.0272893
0.871867	0.10478	1.5688	0.645349	-0.464116	-1.16973
0.867643	0.867741	1.82034	0.93813	1.89073	2.03767
1.94587	1.23697	1.08337	1.4527	0.568798	0.854802
0.379764	-0.0226344	1.66833	-0.547296	0.05095	-0.528188
0.540229	0.452704	0.0192411	-1.06187	0.276017	1.14785
-0.151094	-0.119875	2.08337	-0.132259	1.13782	0.0656805
1.60693	0.488328	1.08337	1.77463	-0.87356	-0.361741
0.52589	0.568181	1.66833	3.4527	-0.253664	0.000191429
0.605324	0.230311	2.4053	-1.5473	0.32438	-0.0878647
1.63697	0.290432	-0.916629	1.4527	2.2533	4.4527
-0.201358	0.172596	0.0833714	1.03767	-0.331666	-0.247736
0.273196	-0.132259	2.74634	1.4527	0.0833714	1.77463
0.240913	0.0901336	0.820337	0.260059	0.120846	0.224435
0.867643	1.27867	0.0833714	0.452704	-0.33984	0.138595
-0.916629	0.452704	-0.179663	0.282779	1.52394	2.15314
0.945868	0.559619	1.89073	0.130776	0.913446	1.34579
2.50484	1.49018	-0.501591	-0.869224	0.336137	0.123396
1.73545	0.856059	1.95784	1.03767	0.105067	-0.370419
2.02979	-0.349357	1.08337	-1.45419	-0.75743	-0.876604
1.77525	1.63104	1.08337	-0.547296	1.20267	0.115669
0.696348	0.972078	-0.916629	-1.35465	0.557303	0.760826
1.91053	0.486651	-0.501591	1.77463	0.931368	1.11567
0.0516626	0.294006	2.08337	2.77463	0.367164	1.20273
0.45534	0.151048	2.89073	0.867741	2.79609	2.27867
0.109844	0.0460784	1.15376	0.774632	0.742335	1.57823
1.45777	-0.34985	0.346406	0.282779	0.305764	0.800627
1.52394	1.4527	-0.501591	1.03767	0.276017	0.707961
0.568798	0.78391	2.66833	0.604707	0.983836	0.452704
0.661908	-0.229556	1.27602	0.130776	0.0833714	0.545813
0.205362	0.0483134	2.08337	1.03767	0.4793	0.725722
4.76987	2.9552	0.445942	-0.0778111	-0.447143	-0.284262
1.15049	0.952275	1.4053	-0.132259	1.59239	1.54581
-0.0994926	-0.425306	0.696348	-0.0327232	0.909342	1.65064
1.29148	1.00524	2.4053	3.03767	0.906494	0.400236
-0.120162	0.912135	-0.473022	-0.869224	1.4053	1.3152
1.27602	0.912135	0.0833714	1.4527	0.689092	0.820435
0.363479	0.0294922	0.568798	1.4527	0.331299	0.730238
3.7686	0.955204	0.0833714	2.03767	0.534033	0.645349
1.2678	1.3007	1.08337	-1.13226	0.242069	0.0197442
-0.194163	0.337226	1.86098	2.62263	0.613886	-0.00672798
0.481921	0.184215	1.08337	1.18967	-0.492489	-0.6848
0.680016	1.03767	1.66833	2.4527	-0.673357	-1.07086
0.4793	0.418756	1.59794	0.815274	-0.80217	-0.717221
1.26557	0.554583	1.5428	0.3152	0.396529	0.736497
0.351305	-0.0857163	2.66833	2.26006	1.08337	0.959664
0.357546	0.201165	0.0833714	0.189669	0.580871	1.33723
1.66833	2.03767	1.08337	1.77463	0.597945	-0.225368
1.68744	1.08658	0.0833714	-0.547296	0.938982	1.92219
0.457767	0.311841	-0.501591	1.18967	2.73872	1.96728
0.756561	0.157248	1.66833	2.26006	0.28268	-0.275994
0.668334	0.774632	3.17083	2.03767	0.700043	1.09656
0.452605	0.300701	1.66833	0.452704	0.147502	0.535166
0.528156	-0.492849	1.08337	1.18967	1.30576	0.967277
0.597945	1.10478	1.00937	1.18967	0.60944	0.774632
1.24384	1.60471	0.0833714	-0.0327232	0.797067	1.49223
0.547319	0.583948	0.498409	-0.225368	2.97646	1.72279
0.0252685	0.069375	2.4053	2.4527	0.588607	0.524853
0.464462	-0.0237344	0.0833714	1.4527	-0.256115	-0.0723874
6.29282	2.32717	1.66833	0.452704	0.833393	-0.096635
0.382932	0.0455283	0.32438	1.6751	-0.571132	-0.582062
1.32438	2.5116	1.08337	0.867741	-0.196736	-0.582062
0.506583	0.248345	3.12777	1.4527	0.256703	0.600802
1.31784	1.0531	1.18291	0.867741	2.01626	1.6751
0.310782	0.547861	1.08337	-0.421765	1.01924	1.15314
0.617708	0.363436	1.66833	0.867741	0.931368	2.77463
1.11959	0.149311	1.08337	0.867741	-0.218284	-0.508822
0.498409	0.0300126	0.820337	1.86774	1.78381	1.68717
0.86359	-0.0587967	0.890726	1.3007	0.604204	0.945744
0.297496	-0.142455	0.668334	0.452704	0.445942	-0.547296
-0.109274	0.074192	0.0833714	-0.987869	1.51401	1.26006
0.399845	0.837367	1.08337	1.18967	1.05828	0.890825
0.338628	0.172596	1.49841	1.26006	-0.539559	-0.037622
0.718087	0.696629	1.66833	1.03767	1.56336	-0.0618695
0.613886	1.6751	-0.916629	1.26006	-0.529605	-0.344804
1.08337	0.235112	0.542803	-0.0618695	-0.476929	-0.769689
0.656557	0.908383	1.95784	1.62263	1.08337	1.2412
-0.345472	0.337226	2.19885	2.03767	1.00937	1.00019
0.882459	0.309746	2.4053	2.4527	0.169101	0.117101
5.63796	4.03767	-0.916629	0.0376661	0.711403	0.530706
0.668334	0.494524	1.74634	-0.0327232	1.11312	1.23511
1.89073	0.0376661	-0.0235438	0.300701	-0.414128	-0.270779
6.1919	2.68974	-0.653594	-0.395293	-0.364088	-0.34985
0.470395	-0.0420611	2.08337	2.03767	0.00207133	-0.34985
1.0309	0.519818	-0.501591	0.452704	-0.117326	-0.66019
0.828114	0.160523	1.99026	-0.00672798	-0.476716	-1.03989
0.190287	0.113217	0.711403	0.230311	1.03275	1.17853
0.907341	-0.272437	1.30576	-0.421765	1.15376	0.839727
0.217673	-0.341977	0.890726	2.4527	0.771427	0.452704
1.193	0.945744	-0.916629	0.452704	0.424408	0.526704
0.597945	0.155023	0.253296	0.0376661	0.957841	0.604707
5.81129	1.62263	2.19885	0.452704	2.17083	1.03767
0.4053	0.696629	1.78381	0.452704	0.468662	0.420282
1.03446	1.57823	0.0833714	0.452704	0.360212	0.157248
1.08337	0.926635	0.498409	3.26006	-0.245936	0.0294922
0.281311	0.165822	-1.57959	-1.66277	0.0599125	-0.132259
1.31219	0.0304706	-1.13902	1.91214	-0.264552	-0.391645
0.187207	-0.0531873	1.60275	0.00524466	0.549035	0.297425
0.248431	-0.132259	-0.0541321	-0.547296	-0.343443	-0.121032
0.926646	0.613168	1.3313	0.645349	-0.312557	-0.462904
3.6968	1.1004	1.17083	1.32717	-0.596872	-1.15395
0.514006	-0.208494	1.15376	1.62263	0.422173	0.922189
2.64816	0.510419	2.4053	-0.132259	-0.360235	0.142364
0.953736	0.218238	-0.303652	-1.28426	-0.0988319	-0.00367466
0.133124	0.147849	-0.0686317	1.26006	0.520777	0.123396
0.550497	0.618714	1.99026	1.77463	0.943968	0.321459
1.01924	1.73281	1.30576	0.590207	0.62394	0.204776
1.10384	1.23858	1.22087	0.967277	0.0833714	0.947468
-0.434477	-0.753747	1.08337	1.4527	0.498409	0.983218
1.01182	0.877201	0.735448	0.867741	0.761443	-0.454187
0.258943	-0.112894	0.735448	-0.354651	0.380353	0.854802
0.537089	0.732812	1.95784	2.26006	0.41779	0.485125
0.313984	-0.386015	0.668334	3.26006	0.807737	-0.0554433
0.214616	-0.33871	0.793865	1.62263	-0.251048	-0.20519
0.563997	0.332409	1.66833	0.815274	-0.0002865	-0.264897
-0.0579844	-0.354651	-1.91663	0.452704	-0.383755	-0.655356
3.4833	4.22529	1.51633	0.774632	-0.168167	-0.699299
2.03943	2.2892	-0.238557	0.130776	-0.0161642	0.189669
4.73545	2.70063	3.66833	3.26006	0.305764	0.300701
0.206228	0.481273	1.74634	0.93813	0.108033	0.300701
0.680612	1.18062	0.585872	0.967277	-0.126082	0.0771945
1.12085	0.895222	0.346406	-0.869224	-0.694236	0.867741
0.742335	-0.0861625	2.30576	3.03767	0.668334	0.253395
1.41232	0.572998	1.89073	2.03767	0.208902	0.244117
0.919873	1.60157	0.0833714	0.260059	1.5573	1.91214
1.62934	0.607982	1.2533	1.86774	0.385934	-0.0237344
1.66833	0.850039	0.4053	0.130776	-0.256479	-0.111197
0.0833714	0.867741	0.568798	0.0376661	0.427326	-0.213559
0.61175	0.400236	0.890726	-0.473296	-0.139021	-0.363584
0.286188	0.300701	3.4053	2.4527	-0.561534	-0.466678
2.3746	2.35959	0.957841	1.32717	-0.614973	-0.547296
1.37555	0.10478	0.431295	0.74221	0.276017	-0.309137
0.580871	0.959664	1.08337	-0.0327232	2.66833	2.03767
2.02399	-0.268142	0.0833714	2.03767	0.546343	0.297425
0.331299	0.483077	1.66833	2.03767	0.799578	-0.498387
0.925307	0.163197	-0.238557	2.03767	0.470395	0.361556
1.7558	1.06414	1.08337	0.590207	0.668334	-0.0998374
1.57522	1.11167	1.2533	2.03767	1.12085	1.24917
-0.167172	-0.462904	0.890726	-0.0327232	0.647272	0.300701
0.190287	0.282779	1.08337	0.645349	0.642799	0.645349
0.809806	0.237691	-0.916629	1.26006	-0.331666	0.452704
1.08337	0.070234	3.08337	2.03767	1.51633	1.12256
-0.524311	-0.0618695	0.4053	0.622629	-0.0478731	0.452704
1.36348	-0.182885	0.931368	0.452704	-0.192263	0.415229
0.582942	0.256783	-0.501591	2.03767	0.755797	1.85709
1.33614	0.378703	0.235375	0.0376661	1.053	2.1004
0.194403	0.2412	1.44594	2.32717	0.113119	0.614975
0.755797	1.42469	1.16137	0.0901336	0.322158	0.547861
0.935273	0.918367	-0.164556	-1.71722	0.492177	0.252405
0.41352	0.428042	1.2533	0.230311	-0.347263	-0.240635
1.97414	0.403794	1.30576	0.282779	-0.611774	-0.418972
0.896958	0.266291	2.82034	0.93813	-0.373836	-0.484561
0.365771	-0.0391495	-1.50159	3.03767	-0.536025	-0.531866
1.74634	1.70063	0.0833714	-0.0327232	-0.374101	-0.679208
1.28268	-0.0778111	1.66833	2.03767	-0.731073	-0.706953
1.04861	-0.124085	-0.402055	0.282779	1.66833	0.74221
0.232749	0.425737	-2.08655	0.675096	1.08337	1.68536
0.720801	0.553987	1.4053	2.26006	2.0403	2.83737
0.0833714	-0.184726	1.19885	-0.440381	-0.238557	0.260059
1.54042	0.312979	1.30576	2.77463	0.597945	-0.0587967
1.43428	0.237691	0.668334	2.4527	1.10984	0.961717
0.739417	0.150141	0.305764	0.452704	1.94587	2.51683
0.70334	0.00204222	0.597945	1.4527	1.3927	1.57823
1.74947	-0.535224	0.820337	0.590207	0.990262	0.993272
2.01626	2.2412	1.66833	2.03767	0.756561	0.789739
1.13922	0.653002	-0.402055	0.452704	0.0833714	0.483077
0.354673	-0.217989	-0.501591	2.77463	0.361673	-0.152158
0.682833	0.452704	0.890726	1.77463	-0.454285	-0.284262
0.587414	0.602081	2.66833	2.03767	-0.224751	-0.302184
1.04273	0.576086	1.32438	0.337226	-0.470227	-0.501493
0.911891	0.317352	0.0833714	1.03767	-0.713812	-0.59169
0.150486	0.173988	-0.568705	-0.662774	-0.706209	-1.06037
0.210751	-0.0922925	2.5428	1.86774	-0.617068	-1.16201
0.0162572	0.552239	2.60693	3.77463	1.65166	1.2524
1.00091	1.53071	-0.0865536	1.18967	1.11579	0.782852
1.3994	0.62554	0.498409	0.452704	0.0192411	1.03767
0.278387	0.524257	-2.50159	-0.547296	0.931368	1.06568
1.43952	0.340811	0.890726	0.867741	-0.249204	0.568181
0.816433	0.158972	1.23021	0.130776	0.681273	0.545813
0.613886	0.0670499	0.0833714	-0.464834	0.62394	0.365241
0.0833714	-0.100895	0.902799	-0.836803	1.10574	1.57823
0.931368	1.33905	0.613886	-0.454187	1.23537	1.6751
0.996494	0.947468	0.0833714	-0.547296	0.630859	1.02302
0.365771	0.640331	2.3313	1.26006	0.890726	0.209432
-0.00151747	0.500009	3.47569	1.23031	1.0665	0.209432
3.2533	3.07161	-0.994631	0.452704	0.0382835	-0.180514
2.78381	0.867741	2.4053	1.4527	-0.739751	-0.236367
1.64246	0.407616	2.47569	1.32717	-0.637913	-0.576443
0.243836	-0.547296	-0.501591	1.4527	-0.635728	-0.633026
0.987794	1.09515	1.22087	1.23031	-0.51453	-0.646832
-0.271293	-0.489811	2.08337	2.03767	-0.727358	-0.674054
-0.501591	0.499246	3.4053	1.77463	-0.601533	-1.12241
1.23113	0.831215	0.445942	-0.354651	-0.224057	-0.863324
1.6021	0.747151	-1.50159	1.6751	0.235375	-0.22912
1.21422	0.189669	1.89073	3.62263	0.641367	0.194906
1.06545	0.0488067	0.498409	2.03767	0.549035	0.452704
-0.225733	-0.791715	1.46188	-0.0618695	-0.147954	0.581028
2.63357	2.4527	1.12777	0.452704	0.337944	0.452704
0.385934	0.642181	0.372878	-0.547296	-0.183415	-0.207221
1.01728	0.689743	0.276017	1.13078	0.16826	-0.207221
0.750796	0.0541543	2.47569	0.260059	-0.631652	-0.295758
0.973189	0.848632	3.5428	1.03767	-0.0709567	-0.295758
2.09967	2.86774	0.470395	-0.769689	-0.701616	-0.329705
2.33971	3.31068	2.99026	0.912135	-0.845075	-0.532797
1.68541	1.81527	1.5688	1.26006	-0.5207	-0.723619
1.49171	0.292239	1.08337	1.4527	-0.139021	-0.786083
0.994104	0.998138	-2.23856	-0.284262	-0.828401	-0.914667
5.39171	2.8548	0.568798	2.18967	1.19885	1.57823
4.89073	4.15314	1.37288	0.452704	0.390033	1.6751
1.87692	1.3913	1.4053	0.715738	1.35639	3.03767
0.327608	-0.0237344	1.08337	0.0376661	0.157372	0.163197
2.61771	2.26006	0.931368	-1.0498	-0.421101	-0.266115
0.185733	0.675096	1.08337	1.4527	0.613886	1.3913
1.21265	-0.0179262	0.0833714	1.18967	0.157372	-0.112894
1.60992	0.392162	1.8092	-0.473296	2.08337	1.51683
1.66833	0.302957	0.0833714	-0.717221	0.439515	0.248345
0.222348	0.340811	2.66833	3.26006	1.63976	1.27583
2.30221	0.847563	2.4053	1.77463	0.813282	0.803201
1.19526	0.227411	2.89073	0.774632	0.948442	0.767577
0.918312	0.146895	0.820337	0.675096	0.4053	0.601567
0.740979	0.0834698	-0.369141	-0.625299	0.409872	0.0376661
1.59794	0.970103	1.49841	1.86774	0.105067	-0.0246181
1.76297	0.452704	1.08337	0.867741	0.134902	-0.10369
5.61735	1.3913	-2.23856	1.4527	-0.358334	-0.350604
2.25787	1.95859	1.08337	1.4527	-0.516541	-0.474784
2.87345	1.86079	1.46188	2.03767	-0.365387	-0.589117
2.15972	2.3007	2.71564	1.6751	-0.291477	-0.908294
3.46804	2.72119	0.957841	0.715738	-0.862181	-0.94096
4.7652	3.15314	1.08337	1.77463	1.23223	1.9502
3.49276	3.74549	-0.132357	-0.60619	0.838259	0.926635
1.48863	0.433845	2.66833	1.91214	0.0360657	0.189669
3.41727	2.77463	0.4053	2.77463	-0.0443841	0.00132429
[truncated: 2,336 more rows]

## Sheet: Fig6D
ED-SL	EI-SL	RI-SL	het non-SL
[truncated: 36,510 more rows]

## Sheet: Fig7
Fig 7A				Fig 7B				Fig 7C
[truncated: 24 more rows]

[truncated: 6 more sheets: FigS10, FigS12E, FigS13A, FigS14, FigS15, FigS16]
